# Supplementary material for: The ERK MAPK Pathway Is Essential for Skeletal Development and Homeostasis
Source: MDPI journal article supplement (doi:10.3390/ijms20081803), 2019-04-12
Supplement: s1 [file s1]

## Supplementary Materials

### **The ERK MAPK pathway is essential for skeletal development and homeostasis**

Jung-Min Kim<sup>1</sup>, Yeon-Suk Yang<sup>1</sup>, Kwang Hwan Park<sup>3</sup>, Hwanhee Oh<sup>4</sup>, Matthew B. Greenblatt<sup>4</sup>, and Jae-Hyuck Shim<sup>1,2\*</sup>

<sup>1</sup>Department of Medicine, <sup>2</sup>Li Weibo Institute for Rare Diseases Research, University of Massachusetts Medical School, Worcester, MA, USA

<sup>3</sup>Department of Orthopaedic Surgery, Yonsei University College of Medicine, Seoul, South Korea

<sup>4</sup>Department of Pathology and Laboratory Medicine, Weill Cornell Medical College, New York, NY, USA

**Supplementary Table S1: Primer sequences used for RT-PCR.**

| Gene                | Forward                   | Reverse                   |
|---------------------|---------------------------|---------------------------|
| Mouse <i>Alpl</i>   | CACAATATCAAGGATATCGACGTGA | ACATCAGTTCTGTTCTTCGGGTACA |
| Mouse <i>Ibsp</i>   | CAGGGAGGCAGTGACTCTTC      | AGTGTGGAAAGTGTGGCGTT      |
| Mouse <i>Sp7</i>    | ATGGCGTCCTCTCTGCTTGA      | GAAGGGTGGGTAGTCATTTG      |
| Mouse <i>Bglap2</i> | GCAGCACAGGTCCTAAATAG      | GGGCAATAAGGTAGTGAACAG     |
| Mouse <i>Col1a1</i> | ACTGTCCCAACCCCAAAG        | ACGTATTCTTCCGGGCAGAA      |
| Mouse <i>Hprt</i>   | CTGGTGAAAAGGACCTCTCGAAG   | CCAGTTTCACTAATGACACAAACG  |

**Supplementary Table S2: Post Translational Modification (PTM) scan results in WT and  $\Delta$ Mek1/2 COBs**

**Supplementary Figure S1. Enrichment of SCF-KIT signaling pathway in WT and  $\Delta$ Mek1/2 COBs.**

Enrichment plots (left) and signature gene sets (right) in WT and *Mek1/2*-deficient ( $\Delta$ *Mek1/2*) COBs culture. GSEA analysis displays enrichment of genes involved with SCF-KIT signaling pathway.

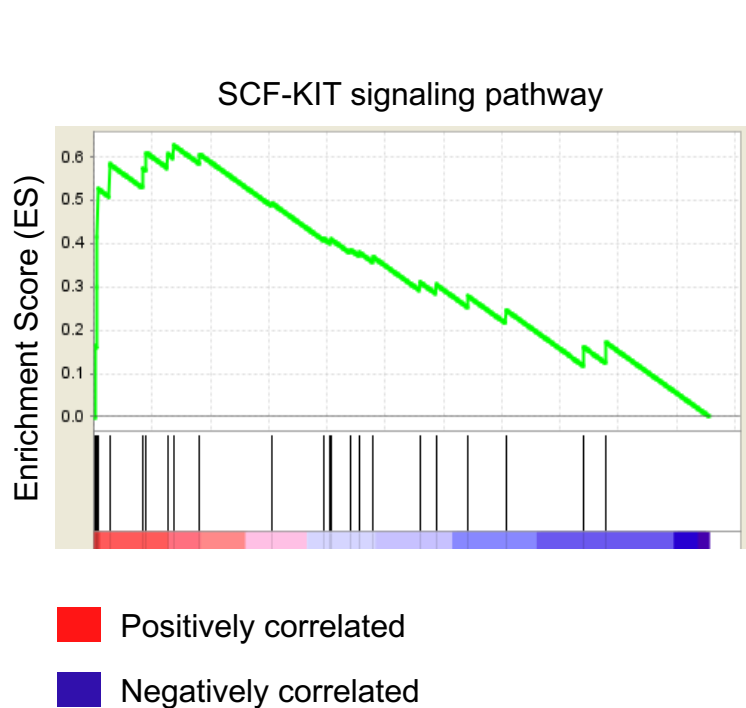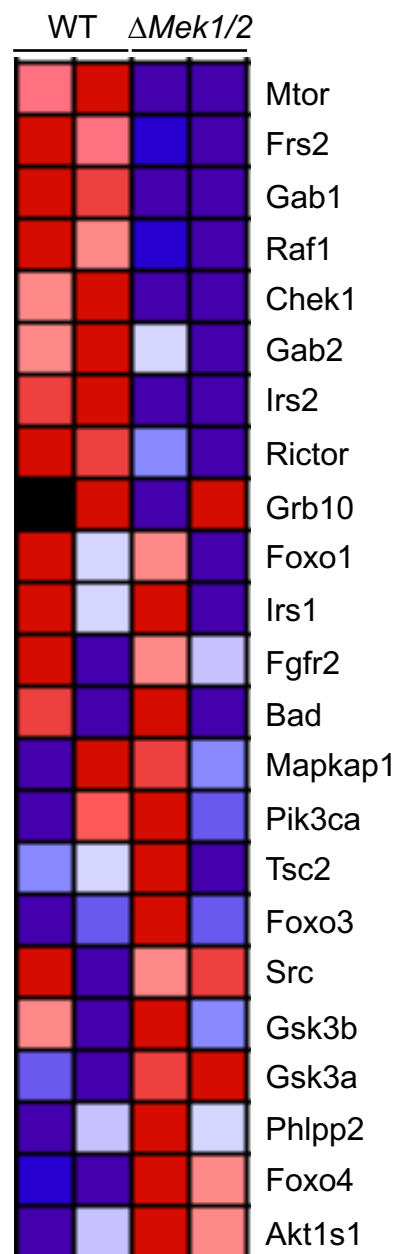

Supplementary Figure S1
