# Supplementary material for: The ERK MAPK Pathway Is Essential for Skeletal Development and Homeostasis
Source: Int J Mol Sci. 2019 Apr 12;20(8):1803. doi: 10.3390/ijms20081803 (PMC6514701; doi:10.3390/ijms20081803)
Supplement: Supplementary file 1 [file ijms-20-01803-s001.zip › ijms-481317 Table S2.xlsx]

## Sheet: Summary
PTMSCAN® RESULTS
Table #1: Mouse Cells; Lys-C/Trypsin Digest; Phospho Akt/AMPK/MAPK-CDK/PKA Substrate Motif Antibody Mix (#9614/#1001/#5759/#2325/#9624)
Samples: WT-D3 = CS 24416, 24417; KO-D3 = CS 24418, 24419																						MEDIAN =	0.131671	0.135273
Legend: * - phosphorylation, # - oxidized methionine, § - published site, Blue Text - CST antibody/siRNA available, Red Intensity = multiple identifications for one m/z.
																	Intensity				Average Intensity		%CV
Index	Index in Detail	Max Intensity	Area (A) or Height (H)	Max %CV	Gene Name	Protein Name	Site	Description	Accession	URL	Peptide	Charge	Calc. m/z	Count In Details	Area (A) or Height (H)	Average RT	WT-D3 (CS24416)	WT-D3 (CS24417)	KO-D3 (CS24418)	KO-D3 (CS24419)	WT-D3	KO-D3	WT-D3	KO-D3	Species
1	Actin-binding
2	1	2.79779e+08	A	0.301101	Fhod1	FHOD1	§502	FH1/FH2 domain-containing protein 1	FHOD1_MOUSE|Q6P9Q4	http://www.phosphosite.org/proteinAction.do?id=5417&showAllSites=true	TPQS*PVSR	2	476.218	4	A	15.9775	2.20211e+08	3.39347e+08	2.36459e+08	2.18489e+08	2.79779e+08	2.27474e+08	0.301101	0.0558621	mouse
3	3	1.69011e+07	A	0.180873	Fhod1	FHOD1	§514	FH1/FH2 domain-containing protein 1	FHOD1_MOUSE|Q6P9Q4	http://www.phosphosite.org/proteinAction.do?id=5417&showAllSites=true	TQRS*LEPEPK	2	632.8	8	A	22.17	1.47396e+07	1.90627e+07	1.1173e+07	9.02274e+06	1.69011e+07	1.00979e+07	0.180873	0.150573	mouse
4	5	5.10408e+07	A	0.182037	Fhod1	FHOD1	§527	FH1/FH2 domain-containing protein 1	FHOD1_MOUSE|Q6P9Q4	http://www.phosphosite.org/proteinAction.do?id=5417&showAllSites=true	KPVSPPS*PK	2	508.762	7	A	17.085	4.44709e+07	5.76107e+07	3.55497e+07	4.15375e+07	5.10408e+07	3.85436e+07	0.182037	0.109851	mouse
5	14	8.22478e+08	A	0.168157	Limch1;Limch1;Limch1	LIMCH1;LIMCH1 iso6 iso 2;LIMCH1 iso6 iso 3	§471; 315; 315	LIM and calponin homology domains-containing protein 1	LIMC1_MOUSE|Q3UH68;LIMC1_MOUSE|Q3UH68-2;LIMC1_MOUSE|Q3UH68-3	http://www.phosphosite.org/proteinAction.do?id=1909604&showAllSites=true	SHS*TEPNVSSFPNDPSPMK	3	713.301	22	A	48.165	3.64368e+08	4.06147e+08	9.20275e+08	7.24682e+08	3.85257e+08	8.22478e+08	0.076681	0.168157	mouse
6	19	4.11745e+08	A	0.101154	Limch1;Limch1;Limch1	LIMCH1;LIMCH1 iso6 iso 2;LIMCH1 iso6 iso 3	§472; 316; 316	LIM and calponin homology domains-containing protein 1	LIMC1_MOUSE|Q3UH68;LIMC1_MOUSE|Q3UH68-2;LIMC1_MOUSE|Q3UH68-3	http://www.phosphosite.org/proteinAction.do?id=1909604&showAllSites=true	SHST*EPNVSSFPNDPSPM#K	3	718.633	18	A	43.1	1.97906e+08	1.71484e+08	4.35199e+08	3.88292e+08	1.84695e+08	4.11745e+08	0.101154	0.0805553	mouse
7	22	9.04192e+06	A	0.234669	Mtss1l	MTSS1L	§271	MTSS1-like protein	MTSSL_MOUSE|Q6P9S0	http://www.phosphosite.org/proteinAction.do?id=6703&showAllSites=true	KSS*M#CSLAQPATTR	3	545.241	4	A	24.7333	6.59392e+06	9.21762e+06	9.4706e+06	8.61324e+06	7.90577e+06	9.04192e+06	0.234669	0.0670486	mouse
8	24	9.04192e+06	A	0.234669	Mtss1l	MTSS1L	§274	MTSS1-like protein	MTSSL_MOUSE|Q6P9S0	http://www.phosphosite.org/proteinAction.do?id=6703&showAllSites=true	KSSM#CS*LAQPATTR	3	545.241	2	A	24.7333	6.59392e+06	9.21762e+06	9.4706e+06	8.61324e+06	7.90577e+06	9.04192e+06	0.234669	0.0670486	mouse
9	28	3.72951e+07	A	0.202053	Mtss1l	MTSS1L	§305	MTSS1-like protein	MTSSL_MOUSE|Q6P9S0	http://www.phosphosite.org/proteinAction.do?id=6703&showAllSites=true	LSSVSSHDSGFVSQDPTYSKPPS*PMPSDITSQK	4	894.158	8	A	53.465	2.55068e+07	3.01404e+07	4.26236e+07	3.19667e+07	2.78236e+07	3.72951e+07	0.117759	0.202053	mouse
10	29	1.37981e+07	A	0.623306	Mtss1l	MTSS1L	§309	MTSS1-like protein	MTSSL_MOUSE|Q6P9S0	http://www.phosphosite.org/proteinAction.do?id=6703&showAllSites=true	LSSVSSHDSGFVSQDPTYSKPPSPM#PS*DITSQK	4	898.157	1	A	50.87	1.88788e+07	7.32821e+06	1.85904e+07	9.00579e+06	1.31035e+07	1.37981e+07	0.623306	0.491179	mouse
11	33	1.2266e+08	A	0.33886	Mtss1l	MTSS1L	§502	MTSS1-like protein	MTSSL_MOUSE|Q6P9S0	http://www.phosphosite.org/proteinAction.do?id=6703&showAllSites=true	RPAST*AGLPTAGLPTAMGLPSGAPPGVATIR	3	989.183	6	A	80.73	7.74721e+07	1.26297e+08	1.22645e+08	1.22675e+08	1.01885e+08	1.2266e+08	0.33886	0.000171209	mouse
12	37	1.66212e+08	A	0.1892	Mtss1l	MTSS1L	§532	MTSS1-like protein	MTSSL_MOUSE|Q6P9S0	http://www.phosphosite.org/proteinAction.do?id=6703&showAllSites=true	TPS*TKPTVR	2	533.768	5	A	14.3325	1.06315e+08	1.39155e+08	1.61588e+08	1.70835e+08	1.22735e+08	1.66212e+08	0.1892	0.0393393	mouse
13	43	2.93908e+08	A	0.088119	Mtss1l	MTSS1L	§542	MTSS1-like protein	MTSSL_MOUSE|Q6P9S0	http://www.phosphosite.org/proteinAction.do?id=6703&showAllSites=true	ALS*SAGPIPIRPPIVPVK	3	631.364	18	A	76.585	2.0809e+08	1.83679e+08	3.10889e+08	2.76926e+08	1.95885e+08	2.93908e+08	0.088119	0.0817125	mouse
14	47	3.41484e+08	A	0.133694	Mtss1l	MTSS1L	§543	MTSS1-like protein	MTSSL_MOUSE|Q6P9S0	http://www.phosphosite.org/proteinAction.do?id=6703&showAllSites=true	RALSS*AGPIPIRPPIVPVK	3	683.398	10	A	71.3825	2.72859e+08	2.67446e+08	3.73766e+08	3.09201e+08	2.70153e+08	3.41484e+08	0.0141672	0.133694	mouse
15	51	1.2266e+08	A	0.33886	Mtss1l	MTSS1L	501	MTSS1-like protein	MTSSL_MOUSE|Q6P9S0	http://www.phosphosite.org/proteinAction.do?id=6703&showAllSites=true	RPAS*TAGLPTAGLPTAMGLPSGAPPGVATIR	3	989.183	7	A	80.73	7.74721e+07	1.26297e+08	1.22645e+08	1.22675e+08	1.01885e+08	1.2266e+08	0.33886	0.000171209	mouse
16	53	1.82868e+07	A	0.287855	Shroom4;Shroom4	SHROOM4;SHROOM4 iso 2	§1010; 894	Protein Shroom4	SHRM4_MOUSE|Q1W617;SHRM4_MOUSE|Q1W617-2	http://www.phosphosite.org/proteinAction.do?id=20901&showAllSites=true	AVS*SLDILGDFK	2	672.826	3	A	99.4033	1.58409e+07	1.27857e+07	2.2009e+07	1.45646e+07	1.43133e+07	1.82868e+07	0.15093	0.287855	mouse
17	Activator protein
18	55	1.23878e+07	A	0.301839	Ppp1r12b	PPP1R12B	§420	Protein phosphatase 1 regulatory subunit 12B	MYPT2_MOUSE|Q8BG95	http://www.phosphosite.org/proteinAction.do?id=4845802&showAllSites=true	RLS*SLFNK	2	522.765	1	A	54.97	1.05681e+07	1.42076e+07	1.36067e+07	8.82009e+06	1.23878e+07	1.12134e+07	0.207744	0.301839	mouse
19	56	4.38772e+07	A	0.156842	Ppp1r12b	PPP1R12B	§833	Protein phosphatase 1 regulatory subunit 12B	MYPT2_MOUSE|Q8BG95	http://www.phosphosite.org/proteinAction.do?id=4845802&showAllSites=true	LES*GGTNPTSSDSYSDR	2	926.865	4	A	31.755	3.04299e+07	3.23175e+07	4.87434e+07	3.9011e+07	3.13737e+07	4.38772e+07	0.0425423	0.156842	mouse
20	64	3.77094e+08	A	0.295306	Ppp1r12b	PPP1R12B	§941	Protein phosphatase 1 regulatory subunit 12B	MYPT2_MOUSE|Q8BG95	http://www.phosphosite.org/proteinAction.do?id=4845802&showAllSites=true	KMS*EMEEEMK	2	676.253	20	A	30.04	1.20862e+08	1.84659e+08	4.07997e+08	3.4619e+08	1.52761e+08	3.77094e+08	0.295306	0.115897	mouse
21	Adaptor/scaffold
22	66	1.36237e+07	A	0.177497	Abi1;Abi1;Abi1;Abi1	Abi-1;Abi-1 iso4 iso 3;Abi-1 iso4 iso 2;Abi-1 iso4 iso 4	§296, §300; 291, 295; 290, 294; 290, 294	Abl interactor 1	ABI1_MOUSE|Q8CBW3;ABI1_MOUSE|Q8CBW3-3;ABI1_MOUSE|Q8CBW3-2;ABI1_MOUSE|Q8CBW3-4	http://www.phosphosite.org/proteinAction.do?id=3348&showAllSites=true	HNS*TTSS*TSSGGYR	2	801.285	1	A	16.34	1.19138e+07	1.53336e+07	1.06547e+07	1.06999e+07	1.36237e+07	1.06773e+07	0.177497	0.00298768	mouse
23	67	2.78816e+08	A	0.17304	Abi1;Abi1;Abi1;Abi1	Abi-1;Abi-1 iso4 iso 3;Abi-1 iso4 iso 2;Abi-1 iso4 iso 4	§296; 291; 290; 290	Abl interactor 1	ABI1_MOUSE|Q8CBW3;ABI1_MOUSE|Q8CBW3-3;ABI1_MOUSE|Q8CBW3-2;ABI1_MOUSE|Q8CBW3-4	http://www.phosphosite.org/proteinAction.do?id=3348&showAllSites=true	HNS*TTSSTSSGGYR	2	761.302	3	A	14.49	2.44701e+08	3.12932e+08	1.87486e+08	1.85823e+08	2.78816e+08	1.86655e+08	0.17304	0.00630118	mouse
24	68	1.36237e+07	A	0.177497	Abi1;Abi1;Abi1;Abi1	Abi-1;Abi-1 iso4 iso 3;Abi-1 iso4 iso 2;Abi-1 iso4 iso 4	§297, 299; 292, 294; 291, 293; 291, 293	Abl interactor 1	ABI1_MOUSE|Q8CBW3;ABI1_MOUSE|Q8CBW3-3;ABI1_MOUSE|Q8CBW3-2;ABI1_MOUSE|Q8CBW3-4	http://www.phosphosite.org/proteinAction.do?id=3348&showAllSites=true	HNST*TS*STSSGGYR	2	801.285	1	A	16.34	1.19138e+07	1.53336e+07	1.06547e+07	1.06999e+07	1.36237e+07	1.06773e+07	0.177497	0.00298768	mouse
25	69	1.40516e+08	A	0.24814	Abi1;Abi1;Abi1;Abi1	Abi-1;Abi-1 iso4 iso 3;Abi-1 iso4 iso 2;Abi-1 iso4 iso 4	§297; 292; 291; 291	Abl interactor 1	ABI1_MOUSE|Q8CBW3;ABI1_MOUSE|Q8CBW3-3;ABI1_MOUSE|Q8CBW3-2;ABI1_MOUSE|Q8CBW3-4	http://www.phosphosite.org/proteinAction.do?id=3348&showAllSites=true	HNST*TSSTSSGGYR	3	507.87	4	A	13.8467	1.26338e+08	1.54695e+08	1.57305e+08	1.10343e+08	1.40516e+08	1.33824e+08	0.142701	0.24814	mouse
26	72	3.72384e+07	A	0.11788	Abi1;Abi1;Abi1;Abi1	Abi-1;Abi-1 iso4 iso 3;Abi-1 iso4 iso 2;Abi-1 iso4 iso 4	§298; 293; 292; 292	Abl interactor 1	ABI1_MOUSE|Q8CBW3;ABI1_MOUSE|Q8CBW3-3;ABI1_MOUSE|Q8CBW3-2;ABI1_MOUSE|Q8CBW3-4	http://www.phosphosite.org/proteinAction.do?id=3348&showAllSites=true	RHNSTT*SSTSSGGYR	3	559.904	4	A	13.6367	3.41344e+07	4.03424e+07	3.70545e+07	3.5151e+07	3.72384e+07	3.61027e+07	0.11788	0.0372818	mouse
27	74	1.8616e+08	A	0.207142	Abi1;Abi1;Abi1;Abi1;Abi1	Abi-1;Abi-1 iso4 iso 3;Abi-1 iso4 iso 2;Abi-1 iso4 iso 4;Abi-1 iso4 iso 5	§183; 178; 178; 178; 178	Abl interactor 1	ABI1_MOUSE|Q8CBW3;ABI1_MOUSE|Q8CBW3-3;ABI1_MOUSE|Q8CBW3-2;ABI1_MOUSE|Q8CBW3-4;ABI1_MOUSE|Q8CBW3-5	http://www.phosphosite.org/proteinAction.do?id=3348&showAllSites=true	TNPPTQKPPS*PPVSGR	3	580.621	7	A	28.8575	1.58893e+08	2.13427e+08	1.51115e+08	1.51628e+08	1.8616e+08	1.51372e+08	0.207142	0.00239614	mouse
28	75	1.17234e+07	A	0.227304	Abi1;Abi1;Abi1;Abi1;Abi1	Abi-1;Abi-1 iso4 iso 3;Abi-1 iso4 iso 2;Abi-1 iso4 iso 4;Abi-1 iso4 iso 5	§196; 191; 191; 191; 191	Abl interactor 1	ABI1_MOUSE|Q8CBW3;ABI1_MOUSE|Q8CBW3-3;ABI1_MOUSE|Q8CBW3-2;ABI1_MOUSE|Q8CBW3-4;ABI1_MOUSE|Q8CBW3-5	http://www.phosphosite.org/proteinAction.do?id=3348&showAllSites=true	NT*PYKTLEPVKPPTVPNDYMTSPAR	3	966.136	1	A	61.36	1.10055e+07	1.24413e+07	1.18677e+07	8.58102e+06	1.17234e+07	1.02244e+07	0.0865988	0.227304	mouse
29	76	7.65408e+06	A	0.646879	Abi1;Abi1;Abi1;Abi1;Abi1	Abi-1;Abi-1 iso4 iso 3;Abi-1 iso4 iso 2;Abi-1 iso4 iso 4;Abi-1 iso4 iso 5	§198, §215; 193, 210; 193, 210; 193, 210; 193, 210	Abl interactor 1	ABI1_MOUSE|Q8CBW3;ABI1_MOUSE|Q8CBW3-3;ABI1_MOUSE|Q8CBW3-2;ABI1_MOUSE|Q8CBW3-4;ABI1_MOUSE|Q8CBW3-5	http://www.phosphosite.org/proteinAction.do?id=3348&showAllSites=true	NTPY*KTLEPVKPPTVPNDYM#T*SPAR	3	998.124	1	A	56.35	1.11551e+07	4.15301e+06	5.55039e+06	3.21043e+06	7.65408e+06	4.38041e+06	0.646879	0.377728	mouse
30	78	2.28323e+07	A	0.217407	Abi1;Abi1;Abi1;Abi1;Abi1	Abi-1;Abi-1 iso4 iso 3;Abi-1 iso4 iso 2;Abi-1 iso4 iso 4;Abi-1 iso4 iso 5	§198; 193; 193; 193; 193	Abl interactor 1	ABI1_MOUSE|Q8CBW3;ABI1_MOUSE|Q8CBW3-3;ABI1_MOUSE|Q8CBW3-2;ABI1_MOUSE|Q8CBW3-4;ABI1_MOUSE|Q8CBW3-5	http://www.phosphosite.org/proteinAction.do?id=3348&showAllSites=true	NTPY*KTLEPVKPPTVPNDYMTSPAR	4	724.854	5	A	57.9325	1.93223e+07	2.63423e+07	2.23945e+07	1.99045e+07	2.28323e+07	2.11495e+07	0.217407	0.0832509	mouse
31	79	7.65408e+06	A	0.646879	Abi1;Abi1;Abi1;Abi1;Abi1	Abi-1;Abi-1 iso4 iso 3;Abi-1 iso4 iso 2;Abi-1 iso4 iso 4;Abi-1 iso4 iso 5	§200, 208; 195, 203; 195, 203; 195, 203; 195, 203	Abl interactor 1	ABI1_MOUSE|Q8CBW3;ABI1_MOUSE|Q8CBW3-3;ABI1_MOUSE|Q8CBW3-2;ABI1_MOUSE|Q8CBW3-4;ABI1_MOUSE|Q8CBW3-5	http://www.phosphosite.org/proteinAction.do?id=3348&showAllSites=true	NTPYKT*LEPVKPPT*VPNDYM#TSPAR	3	998.124	1	A	56.35	1.11551e+07	4.15301e+06	5.55039e+06	3.21043e+06	7.65408e+06	4.38041e+06	0.646879	0.377728	mouse
32	81	2.28323e+07	A	0.217407	Abi1;Abi1;Abi1;Abi1;Abi1	Abi-1;Abi-1 iso4 iso 3;Abi-1 iso4 iso 2;Abi-1 iso4 iso 4;Abi-1 iso4 iso 5	§200; 195; 195; 195; 195	Abl interactor 1	ABI1_MOUSE|Q8CBW3;ABI1_MOUSE|Q8CBW3-3;ABI1_MOUSE|Q8CBW3-2;ABI1_MOUSE|Q8CBW3-4;ABI1_MOUSE|Q8CBW3-5	http://www.phosphosite.org/proteinAction.do?id=3348&showAllSites=true	NTPYKT*LEPVKPPTVPNDYMTSPAR	4	724.854	4	A	57.9325	1.93223e+07	2.63423e+07	2.23945e+07	1.99045e+07	2.28323e+07	2.11495e+07	0.217407	0.0832509	mouse
33	82	2.03413e+08	A	0.326091	Abi1;Abi1;Abi1;Abi1;Abi1	Abi-1;Abi-1 iso4 iso 3;Abi-1 iso4 iso 2;Abi-1 iso4 iso 4;Abi-1 iso4 iso 5	§213; 208; 208; 208; 208	Abl interactor 1	ABI1_MOUSE|Q8CBW3;ABI1_MOUSE|Q8CBW3-3;ABI1_MOUSE|Q8CBW3-2;ABI1_MOUSE|Q8CBW3-4;ABI1_MOUSE|Q8CBW3-5	http://www.phosphosite.org/proteinAction.do?id=3348&showAllSites=true	TLEPVKPPTVPNDY*M#TSPAR	3	770.368	4	A	52.58	2.45864e+08	1.60963e+08	1.63133e+08	1.01999e+08	2.03413e+08	1.32566e+08	0.295132	0.326091	mouse
34	85	2.03413e+08	A	0.326091	Abi1;Abi1;Abi1;Abi1;Abi1	Abi-1;Abi-1 iso4 iso 3;Abi-1 iso4 iso 2;Abi-1 iso4 iso 4;Abi-1 iso4 iso 5	§215; 210; 210; 210; 210	Abl interactor 1	ABI1_MOUSE|Q8CBW3;ABI1_MOUSE|Q8CBW3-3;ABI1_MOUSE|Q8CBW3-2;ABI1_MOUSE|Q8CBW3-4;ABI1_MOUSE|Q8CBW3-5	http://www.phosphosite.org/proteinAction.do?id=3348&showAllSites=true	TLEPVKPPTVPNDYM#T*SPAR	3	770.368	2	A	52.58	2.45864e+08	1.60963e+08	1.63133e+08	1.01999e+08	2.03413e+08	1.32566e+08	0.295132	0.326091	mouse
35	89	3.30016e+08	A	0.148454	Abi1;Abi1;Abi1;Abi1;Abi1	Abi-1;Abi-1 iso4 iso 3;Abi-1 iso4 iso 2;Abi-1 iso4 iso 4;Abi-1 iso4 iso 5	§216; 211; 211; 211; 211	Abl interactor 1	ABI1_MOUSE|Q8CBW3;ABI1_MOUSE|Q8CBW3-3;ABI1_MOUSE|Q8CBW3-2;ABI1_MOUSE|Q8CBW3-4;ABI1_MOUSE|Q8CBW3-5	http://www.phosphosite.org/proteinAction.do?id=3348&showAllSites=true	TLEPVKPPTVPNDYMTS*PAR	3	765.036	13	A	58.6775	2.95373e+08	3.64659e+08	2.7533e+08	2.49322e+08	3.30016e+08	2.62326e+08	0.148454	0.070106	mouse
36	90	1.27798e+08	A	0.109906	Abi1;Abi1;Abi1;Abi1;Abi1	Abi-1;Abi-1 iso4 iso 3;Abi-1 iso4 iso 2;Abi-1 iso4 iso 4;Abi-1 iso4 iso 5	§222; 217; 217; 217; 217	Abl interactor 1	ABI1_MOUSE|Q8CBW3;ABI1_MOUSE|Q8CBW3-3;ABI1_MOUSE|Q8CBW3-2;ABI1_MOUSE|Q8CBW3-4;ABI1_MOUSE|Q8CBW3-5	http://www.phosphosite.org/proteinAction.do?id=3348&showAllSites=true	LGS*QHSPGR	2	509.727	2	A	12.86	1.17866e+08	1.3773e+08	9.9065e+07	9.18466e+07	1.27798e+08	9.54558e+07	0.109906	0.0534717	mouse
37	92	1.27798e+08	A	0.109906	Abi1;Abi1;Abi1;Abi1;Abi1	Abi-1;Abi-1 iso4 iso 3;Abi-1 iso4 iso 2;Abi-1 iso4 iso 4;Abi-1 iso4 iso 5	§225; 220; 220; 220; 220	Abl interactor 1	ABI1_MOUSE|Q8CBW3;ABI1_MOUSE|Q8CBW3-3;ABI1_MOUSE|Q8CBW3-2;ABI1_MOUSE|Q8CBW3-4;ABI1_MOUSE|Q8CBW3-5	http://www.phosphosite.org/proteinAction.do?id=3348&showAllSites=true	LGSQHS*PGR	2	509.727	9	A	12.86	1.17866e+08	1.3773e+08	9.9065e+07	9.18466e+07	1.27798e+08	9.54558e+07	0.109906	0.0534717	mouse
38	95	1.76976e+08	A	0.343372	Abi1;Abi1;Abi1;Abi1;Abi1	Abi-1;Abi-1 iso4 iso 3;Abi-1 iso4 iso 2;Abi-1 iso4 iso 4;Abi-1 iso4 iso 5	§231; 226; 226; 226; 226	Abl interactor 1	ABI1_MOUSE|Q8CBW3;ABI1_MOUSE|Q8CBW3-3;ABI1_MOUSE|Q8CBW3-2;ABI1_MOUSE|Q8CBW3-4;ABI1_MOUSE|Q8CBW3-5	http://www.phosphosite.org/proteinAction.do?id=3348&showAllSites=true	TAS*LNQRPR	3	374.852	4	A	16.9125	1.29493e+08	1.32727e+08	2.19946e+08	1.34006e+08	1.3111e+08	1.76976e+08	0.0174456	0.343372	mouse
39	97	39916698	A	0.0759051	Abi2	Abi-2	§210	Abl interactor 2	ABI2_MOUSE|P62484	http://www.phosphosite.org/proteinAction.do?id=6880&showAllSites=true	TLEPVRPPVVPNDYVPS*PTR	3	771.726	1	A	64.86	41535520	38297876	26549136	23844364	39916698	25196750	0.0573534	0.0759051	mouse
40	98	1.05304e+06	A	0.64193	Abi2	Abi-2	§218	Abl interactor 2	ABI2_MOUSE|P62484	http://www.phosphosite.org/proteinAction.do?id=6880&showAllSites=true	NM#APS*QQSPVR	2	655.782	2	A	21.13	741154	1364935	531954	1416284	1.05304e+06	974119	0.418861	0.64193	mouse
41	100	3.39693e+07	A	0.292907	Abi2	Abi-2	§221	Abl interactor 2	ABI2_MOUSE|P62484	http://www.phosphosite.org/proteinAction.do?id=6880&showAllSites=true	NMAPSQQS*PVR	2	647.784	3	A	23.4233	2.69337e+07	4.10049e+07	2.21555e+07	2.0529e+07	3.39693e+07	2.13423e+07	0.292907	0.0538882	mouse
42	102	7.92239e+06	A	0.03708	Abi2	Abi-2	§236	Abl interactor 2	ABI2_MOUSE|P62484	http://www.phosphosite.org/proteinAction.do?id=6880&showAllSites=true	TYS*SSGSSGGSHPSSR	3	540.881	7	A	13.4925	6.12618e+06	6.39302e+06	8.13011e+06	7.71467e+06	6.2596e+06	7.92239e+06	0.0301433	0.03708	mouse
43	103	1.54711e+08	A	0.111187	Afap1	AFAP	§665	Actin filament-associated protein 1	AFAP1_MOUSE|Q80YS6	http://www.phosphosite.org/proteinAction.do?id=10327&showAllSites=true	SGTS*SPQSPVFR	2	665.295	3	A	37.8275	1.20566e+08	1.02989e+08	1.65241e+08	1.44181e+08	1.11778e+08	1.54711e+08	0.111187	0.0962575	mouse
44	105	6.65251e+08	A	0.16855	Afap1	AFAP	§665, §669	Actin filament-associated protein 1	AFAP1_MOUSE|Q80YS6	http://www.phosphosite.org/proteinAction.do?id=10327&showAllSites=true	SGTS*SPQS*PVFR	2	705.279	6	A	43.06	4.14945e+08	5.16755e+08	7.44537e+08	5.85964e+08	4.6585e+08	6.65251e+08	0.154536	0.16855	mouse
45	106	1.54711e+08	A	0.111187	Afap1	AFAP	§666	Actin filament-associated protein 1	AFAP1_MOUSE|Q80YS6	http://www.phosphosite.org/proteinAction.do?id=10327&showAllSites=true	SGTSS*PQSPVFR	2	665.295	2	A	37.8275	1.20566e+08	1.02989e+08	1.65241e+08	1.44181e+08	1.11778e+08	1.54711e+08	0.111187	0.0962575	mouse
46	109	6.65251e+08	A	0.16855	Afap1	AFAP	§666, §669	Actin filament-associated protein 1	AFAP1_MOUSE|Q80YS6	http://www.phosphosite.org/proteinAction.do?id=10327&showAllSites=true	SGTSS*PQS*PVFR	2	705.279	12	A	43.06	4.14945e+08	5.16755e+08	7.44537e+08	5.85964e+08	4.6585e+08	6.65251e+08	0.154536	0.16855	mouse
47	112	1.54711e+08	A	0.111187	Afap1	AFAP	§669	Actin filament-associated protein 1	AFAP1_MOUSE|Q80YS6	http://www.phosphosite.org/proteinAction.do?id=10327&showAllSites=true	SGTSSPQS*PVFR	2	665.295	12	A	37.8275	1.20566e+08	1.02989e+08	1.65241e+08	1.44181e+08	1.11778e+08	1.54711e+08	0.111187	0.0962575	mouse
48	114	6.27609e+07	A	0.240609	Akap12;Akap12	AKAP12;AKAP12 iso 2	§613, §615; 508, 510	A-kinase anchor protein 12	AKA12_MOUSE|Q9WTQ5;AKA12_MOUSE|Q9WTQ5-2	http://www.phosphosite.org/proteinAction.do?id=6741&showAllSites=true	RPS*ES*DKEEELDK	3	574.56	7	A	21.1475	5.42993e+07	5.95556e+07	7.34388e+07	5.2083e+07	5.69275e+07	6.27609e+07	0.0652895	0.240609	mouse
49	123	7.37831e+07	A	0.0991834	Akap12;Akap12	AKAP12;AKAP12 iso 2	§613; 508	A-kinase anchor protein 12	AKA12_MOUSE|Q9WTQ5;AKA12_MOUSE|Q9WTQ5-2	http://www.phosphosite.org/proteinAction.do?id=6741&showAllSites=true	VRRPS*ESDKEEELDK	3	632.962	27	A	18.825	6.86084e+07	7.89577e+07	6.97307e+07	7.47823e+07	7.37831e+07	7.22565e+07	0.0991834	0.0494358	mouse
50	127	7.37831e+07	A	0.0991834	Akap12;Akap12	AKAP12;AKAP12 iso 2	§615; 510	A-kinase anchor protein 12	AKA12_MOUSE|Q9WTQ5;AKA12_MOUSE|Q9WTQ5-2	http://www.phosphosite.org/proteinAction.do?id=6741&showAllSites=true	VRRPSES*DKEEELDK	3	632.962	9	A	18.825	6.86084e+07	7.89577e+07	6.97307e+07	7.47823e+07	7.37831e+07	7.22565e+07	0.0991834	0.0494358	mouse
51	128	1.01237e+08	A	0.0897174	Akap12;Akap12	AKAP12;AKAP12 iso 2	§682; 577	A-kinase anchor protein 12	AKA12_MOUSE|Q9WTQ5;AKA12_MOUSE|Q9WTQ5-2	http://www.phosphosite.org/proteinAction.do?id=6741&showAllSites=true	KAS*SSDDEGGPR	2	643.256	4	A	12.3125	9.48143e+07	1.07659e+08	8.05262e+07	8.236e+07	1.01237e+08	8.14431e+07	0.0897174	0.0159211	mouse
52	129	1.34958e+07	A	0.44096	Akap12;Akap12	AKAP12;AKAP12 iso 2	§684; 579	A-kinase anchor protein 12	AKA12_MOUSE|Q9WTQ5;AKA12_MOUSE|Q9WTQ5-2	http://www.phosphosite.org/proteinAction.do?id=6741&showAllSites=true	KASSS*DDEGGPR	3	429.173	4	A	12.42	1.19913e+07	9.69714e+06	1.77039e+07	9.28774e+06	1.08442e+07	1.34958e+07	0.149594	0.44096	mouse
53	131	6.60136e+08	A	0.178095	Akap1;Akap1;Akap1;Akap1;Akap1;Akap1	AKAP1;AKAP1 iso 2;AKAP1 iso 3;AKAP1 iso 4;AKAP1 iso 5;AKAP1 iso 6	§101; §101; 134; 134; §101; §101	A-kinase anchor protein 1, mitochondrial	AKAP1_MOUSE|O08715;AKAP1_MOUSE|O08715-2;AKAP1_MOUSE|O08715-3;AKAP1_MOUSE|O08715-4;AKAP1_MOUSE|O08715-5;AKAP1_MOUSE|O08715-6	http://www.phosphosite.org/proteinAction.do?id=7076&showAllSites=true	RRS*ESSGNLPSVADTR	3	604.618	6	A	29.91	3.80733e+08	4.90442e+08	7.06371e+08	6.139e+08	4.35587e+08	6.60136e+08	0.178095	0.0990509	mouse
54	132	3.13774e+07	A	0.1266	Akap1;Akap1;Akap1;Akap1;Akap1;Akap1	AKAP1;AKAP1 iso 2;AKAP1 iso 3;AKAP1 iso 4;AKAP1 iso 5;AKAP1 iso 6	§103; §103; 136; 136; §103; §103	A-kinase anchor protein 1, mitochondrial	AKAP1_MOUSE|O08715;AKAP1_MOUSE|O08715-2;AKAP1_MOUSE|O08715-3;AKAP1_MOUSE|O08715-4;AKAP1_MOUSE|O08715-5;AKAP1_MOUSE|O08715-6	http://www.phosphosite.org/proteinAction.do?id=7076&showAllSites=true	SES*SGNLPSVADTR	2	750.322	3	A	42.99	1.33552e+07	1.59815e+07	3.30484e+07	2.97064e+07	1.46683e+07	3.13774e+07	0.1266	0.0753148	mouse
55	133	3.13774e+07	A	0.1266	Akap1;Akap1;Akap1;Akap1;Akap1;Akap1	AKAP1;AKAP1 iso 2;AKAP1 iso 3;AKAP1 iso 4;AKAP1 iso 5;AKAP1 iso 6	§104; §104; 137; 137; §104; §104	A-kinase anchor protein 1, mitochondrial	AKAP1_MOUSE|O08715;AKAP1_MOUSE|O08715-2;AKAP1_MOUSE|O08715-3;AKAP1_MOUSE|O08715-4;AKAP1_MOUSE|O08715-5;AKAP1_MOUSE|O08715-6	http://www.phosphosite.org/proteinAction.do?id=7076&showAllSites=true	SESS*GNLPSVADTR	2	750.322	1	A	42.99	1.33552e+07	1.59815e+07	3.30484e+07	2.97064e+07	1.46683e+07	3.13774e+07	0.1266	0.0753148	mouse
56	139	3.32222e+08	A	0.064307	Akap1;Akap1;Akap1;Akap1;Akap1;Akap1	AKAP1;AKAP1 iso 2;AKAP1 iso 3;AKAP1 iso 4;AKAP1 iso 5;AKAP1 iso 6	§55; §55; 88; 88; §55; §55	A-kinase anchor protein 1, mitochondrial	AKAP1_MOUSE|O08715;AKAP1_MOUSE|O08715-2;AKAP1_MOUSE|O08715-3;AKAP1_MOUSE|O08715-4;AKAP1_MOUSE|O08715-5;AKAP1_MOUSE|O08715-6	http://www.phosphosite.org/proteinAction.do?id=7076&showAllSites=true	RLS*EEACPGVLSVAPTVTQPPGR	3	834.412	23	A	61.2525	2.55502e+08	2.47821e+08	3.47329e+08	3.17115e+08	2.51661e+08	3.32222e+08	0.0215823	0.064307	mouse
57	142	3.93718e+07	A	0.180408	Akap2;Akap2;Akap2;Akap2;Akap2	AKAP2;AKAP2 iso6 iso 2;AKAP2 iso3 iso 3;AKAP2 iso6 iso 4;AKAP2 iso6 iso 5	§152; 152; 152; 28; 28	A-kinase anchor protein 2	AKAP2_MOUSE|O54931;AKAP2_MOUSE|O54931-2;AKAP2_MOUSE|O54931-3;AKAP2_MOUSE|O54931-4;AKAP2_MOUSE|O54931-5	http://www.phosphosite.org/proteinAction.do?id=4359&showAllSites=true	ANGHSTDQPQDLLGNSLQAPAS*PSSSTSSHCSSR	4	891.138	2	A	51.2	3.69215e+07	4.18221e+07	3.92188e+07	3.03448e+07	3.93718e+07	3.47818e+07	0.0880142	0.180408	mouse
58	143	1.83283e+07	A	0.192244	Amotl1;Amotl1	AMOTL1;AMOTL1 iso 2	§913; 827	Angiomotin-like protein 1	AMOL1_MOUSE|Q9D4H4;AMOL1_MOUSE|Q9D4H4-2	http://www.phosphosite.org/proteinAction.do?id=6999&showAllSites=true	LST*APSNSPILK	2	654.334	2	A	44.695	9.69225e+06	1.27419e+07	1.76844e+07	1.89721e+07	1.12171e+07	1.83283e+07	0.192244	0.0496811	mouse
59	144	6.81061e+07	A	0.0915712	Ank3;Ank3;Ank3;Ank3;Ank3;Ank3	ANK3;ANK3 iso2 iso 2;ANK3 iso10 iso 3;ANK3 iso10 iso 4;ANK3 iso10 iso 5;ANK3 iso6 iso 6	§1451; 1412; 1412; 584; 584; 584	Ankyrin-3	ANK3_MOUSE|G5E8K5;ANK3_MOUSE|G5E8K5-2;ANK3_MOUSE|G5E8K5-3;ANK3_MOUSE|G5E8K5-4;ANK3_MOUSE|G5E8K5-5;ANK3_MOUSE|G5E8K5-6	http://www.phosphosite.org/proteinAction.do?id=5260&showAllSites=true	RQS*FASLALR	2	614.813	3	A	53.9333	6.36962e+07	7.2516e+07	6.51173e+07	5.90681e+07	6.81061e+07	6.20927e+07	0.0915712	0.0688876	mouse
60	146	1.87025e+07	A	0.179055	Apba1;Apba1	APBA1;APBA1 iso 3	§309, §317; §309, §317	Amyloid beta A4 precursor protein-binding family A member 1	APBA1_MOUSE|B2RUJ5;APBA1_MOUSE|B2RUJ5-3	http://www.phosphosite.org/proteinAction.do?id=18185&showAllSites=true	APT*PGGGHPDS*PGLPAPAGQQQR	3	785.009	5	A	39.25	1.97934e+07	1.53445e+07	1.72654e+07	2.01395e+07	1.75689e+07	1.87025e+07	0.179055	0.108664	mouse
61	147	2.33865e+06	A	0.795248	Apba1;Apba1	APBA1;APBA1 iso 3	§85; §85	Amyloid beta A4 precursor protein-binding family A member 1	APBA1_MOUSE|B2RUJ5;APBA1_MOUSE|B2RUJ5-3	http://www.phosphosite.org/proteinAction.do?id=18185&showAllSites=true	SAST*ESGFHNHTDTAEGDVLAAAR	3	842.029	1	A	49.02	700512	2500552	3090802	1586499	1600532	2.33865e+06	0.795248	0.454836	mouse
62	148	4.2389e+08	A	0.222096	Apbb1ip	RIAM	§531	Amyloid beta A4 precursor protein-binding family B member 1-interacting protein	AB1IP_MOUSE|Q8R5A3	http://www.phosphosite.org/proteinAction.do?id=8963&showAllSites=true	RS*SDTCGSPALPSK	2	771.835	1	A	23.28	3.5732e+08	4.90461e+08	3.41194e+08	4.19752e+08	4.2389e+08	3.80473e+08	0.222096	0.146	mouse
63	149	4.65592e+07	A	0.0280763	Apbb1ip	RIAM	§531, §537	Amyloid beta A4 precursor protein-binding family B member 1-interacting protein	AB1IP_MOUSE|Q8R5A3	http://www.phosphosite.org/proteinAction.do?id=8963&showAllSites=true	S*SDTCGS*PALPSK	2	733.767	2	A	31.605	4.56348e+07	4.74835e+07	3.52875e+07	3.45959e+07	4.65592e+07	3.49417e+07	0.0280763	0.0139951	mouse
64	153	4.54595e+08	A	0.141341	Apbb1ip	RIAM	§532	Amyloid beta A4 precursor protein-binding family B member 1-interacting protein	AB1IP_MOUSE|Q8R5A3	http://www.phosphosite.org/proteinAction.do?id=8963&showAllSites=true	RSS*DTCGSPALPSK	3	514.892	16	A	26.6775	3.04201e+08	3.57523e+08	5.00029e+08	4.09161e+08	3.30862e+08	4.54595e+08	0.113957	0.141341	mouse
65	156	1.88432e+08	A	0.156075	Apbb1ip	RIAM	§532, §534	Amyloid beta A4 precursor protein-binding family B member 1-interacting protein	AB1IP_MOUSE|Q8R5A3	http://www.phosphosite.org/proteinAction.do?id=8963&showAllSites=true	RSS*DT*CGSPALPSK	2	811.818	1	A	26.19	1.67636e+08	2.09228e+08	1.18677e+08	1.2712e+08	1.88432e+08	1.22899e+08	0.156075	0.0485787	mouse
66	159	1.053e+08	A	0.170978	Apbb1ip	RIAM	§532, §537	Amyloid beta A4 precursor protein-binding family B member 1-interacting protein	AB1IP_MOUSE|Q8R5A3	http://www.phosphosite.org/proteinAction.do?id=8963&showAllSites=true	RSS*DTCGS*PALPSK	3	541.548	10	A	26.2	9.42284e+07	1.10298e+08	1.18031e+08	9.25692e+07	1.02263e+08	1.053e+08	0.111115	0.170978	mouse
67	161	2.37368e+08	A	0.0659402	Apbb1ip	RIAM	§534	Amyloid beta A4 precursor protein-binding family B member 1-interacting protein	AB1IP_MOUSE|Q8R5A3	http://www.phosphosite.org/proteinAction.do?id=8963&showAllSites=true	SSDT*CGSPALPSK	2	693.784	2	A	30.38	2.29702e+08	2.45035e+08	1.93453e+08	2.12375e+08	2.37368e+08	2.02914e+08	0.0456774	0.0659402	mouse
68	162	21942040	A	0.820492	Apbb1ip	RIAM	519	Amyloid beta A4 precursor protein-binding family B member 1-interacting protein	AB1IP_MOUSE|Q8R5A3	http://www.phosphosite.org/proteinAction.do?id=8963&showAllSites=true	S*SLPPPPPPVR	2	612.313	1	A	41.22	16201268	15479336	34672280	9211800	15840302	21942040	0.0322268	0.820492	mouse
69	163	21942040	A	0.820492	Apbb1ip	RIAM	520	Amyloid beta A4 precursor protein-binding family B member 1-interacting protein	AB1IP_MOUSE|Q8R5A3	http://www.phosphosite.org/proteinAction.do?id=8963&showAllSites=true	SS*LPPPPPPVR	2	612.313	1	A	41.22	16201268	15479336	34672280	9211800	15840302	21942040	0.0322268	0.820492	mouse
70	164	2.66969e+08	A	0.186658	Baiap2l1	IRTKS	§421	Brain-specific angiogenesis inhibitor 1-associated protein 2-like protein 1	BI2L1_MOUSE|Q9DBJ3	http://www.phosphosite.org/proteinAction.do?id=7019&showAllSites=true	SIS*TVDLTEK	2	586.776	4	A	48.2825	1.96376e+08	1.91858e+08	3.02206e+08	2.31733e+08	1.94117e+08	2.66969e+08	0.0164597	0.186658	mouse
71	165	16787302	A	0.331934	Bcar3;Bcar3	BCAR3;BCAR3 iso 2	§365; 245	Breast cancer anti-estrogen resistance protein 3	BCAR3_MOUSE|Q9QZK2;BCAR3_MOUSE|Q9QZK2-2	http://www.phosphosite.org/proteinAction.do?id=7189&showAllSites=true	TGS*EPTLSPALVR	2	704.348	2	A	60.205	15258312	9457256	18802698	14771906	12357784	16787302	0.331934	0.169783	mouse
72	166	8.769e+06	A	0.161131	Bcar3;Bcar3	BCAR3;BCAR3 iso 2	§378; 258	Breast cancer anti-estrogen resistance protein 3	BCAR3_MOUSE|Q9QZK2;BCAR3_MOUSE|Q9QZK2-2	http://www.phosphosite.org/proteinAction.do?id=7189&showAllSites=true	RFS*SDAR	2	459.695	2	A	15.8	5.82116e+06	7.31822e+06	9.0497e+06	8.4883e+06	6.56969e+06	8.769e+06	0.161131	0.04527	mouse
73	167	8.769e+06	A	0.161131	Bcar3;Bcar3	BCAR3;BCAR3 iso 2	379; 259	Breast cancer anti-estrogen resistance protein 3	BCAR3_MOUSE|Q9QZK2;BCAR3_MOUSE|Q9QZK2-2	http://www.phosphosite.org/proteinAction.do?id=7189&showAllSites=true	RFSS*DAR	2	459.695	1	A	15.8	5.82116e+06	7.31822e+06	9.0497e+06	8.4883e+06	6.56969e+06	8.769e+06	0.161131	0.04527	mouse
74	170	5.07175e+07	A	0.180518	Cables1	CABLES1	§350	CDK5 and ABL1 enzyme substrate 1	CABL1_MOUSE|Q9ESJ1	http://www.phosphosite.org/proteinAction.do?id=23561&showAllSites=true	RNT*IDSTASFSQFR	3	570.593	8	A	60.6625	3.43234e+07	3.56825e+07	5.71914e+07	4.42437e+07	3.5003e+07	5.07175e+07	0.0274554	0.180518	mouse
75	172	1.50178e+08	A	0.162208	Ccm2;Ccm2	CCM2;CCM2 iso 2	§393; 378	Malcavernin	CCM2_MOUSE|Q8K2Y9;CCM2_MOUSE|Q8K2Y9-2	http://www.phosphosite.org/proteinAction.do?id=15832&showAllSites=true	GIITDS*FGR	2	523.239	6	A	57.7225	1.47209e+08	1.53146e+08	1.49688e+08	1.18883e+08	1.50178e+08	1.34285e+08	0.0279569	0.162208	mouse
76	173	4.59614e+07	A	0.0599847	Ccm2;Ccm2	CCM2;CCM2 iso 2	§402, §405; 387, 390	Malcavernin	CCM2_MOUSE|Q8K2Y9;CCM2_MOUSE|Q8K2Y9-2	http://www.phosphosite.org/proteinAction.do?id=15832&showAllSites=true	ALS*TTS*TSTINGNR	2	791.829	2	A	34.12	4.26138e+07	3.91459e+07	4.58293e+07	4.60936e+07	4.08799e+07	4.59614e+07	0.0599847	0.00406543	mouse
77	174	1.96708e+08	A	0.183074	Ccm2;Ccm2	CCM2;CCM2 iso 2	§402; 387	Malcavernin	CCM2_MOUSE|Q8K2Y9;CCM2_MOUSE|Q8K2Y9-2	http://www.phosphosite.org/proteinAction.do?id=15832&showAllSites=true	ALS*TTSTSTINGNR	2	751.846	4	A	33.3	1.71244e+08	2.22173e+08	1.60985e+08	1.7545e+08	1.96708e+08	1.68217e+08	0.183074	0.0608028	mouse
78	175	4.59614e+07	A	0.0599847	Ccm2;Ccm2	CCM2;CCM2 iso 2	§404, §405; 389, 390	Malcavernin	CCM2_MOUSE|Q8K2Y9;CCM2_MOUSE|Q8K2Y9-2	http://www.phosphosite.org/proteinAction.do?id=15832&showAllSites=true	ALSTT*S*TSTINGNR	2	791.829	2	A	34.12	4.26138e+07	3.91459e+07	4.58293e+07	4.60936e+07	4.08799e+07	4.59614e+07	0.0599847	0.00406543	mouse
79	178	3.15146e+08	A	0.182297	Cd2bp2	CD2BP2	§196	CD2 antigen cytoplasmic tail-binding protein 2	CD2B2_MOUSE|Q9CWK3	http://www.phosphosite.org/proteinAction.do?id=14938&showAllSites=true	GTGRPNS*PQRLDR	3	511.914	7	A	13.0375	2.46224e+08	3.06589e+08	3.55769e+08	2.74523e+08	2.76406e+08	3.15146e+08	0.154427	0.182297	mouse
80	181	2.14537e+08	A	0.154536	Ctnnd1;Ctnnd1;Ctnnd1	CTNND1;CTNND1 iso3 iso 2;CTNND1 iso3 iso 3	§201; 201; 201	Catenin delta-1	CTND1_MOUSE|P30999;CTND1_MOUSE|P30999-2;CTND1_MOUSE|P30999-3	http://www.phosphosite.org/proteinAction.do?id=3337&showAllSites=true	NGNGGPGPYVGQAGTAT*LPR	3	655.306	10	A	50.6625	2.28251e+08	2.00823e+08	1.68599e+08	1.35382e+08	2.14537e+08	1.5199e+08	0.0903999	0.154536	mouse
81	183	3.28949e+08	A	0.112868	Ctnnd1;Ctnnd1;Ctnnd1	CTNND1;CTNND1 iso3 iso 2;CTNND1 iso3 iso 3	§225; §225; §225	Catenin delta-1	CTND1_MOUSE|P30999;CTND1_MOUSE|P30999-2;CTND1_MOUSE|P30999-3	http://www.phosphosite.org/proteinAction.do?id=3337&showAllSites=true	HYEDGYPGGS*DNYGSLSR	2	1027.4	2	A	42.86	3.34417e+08	3.2348e+08	3.1107e+08	2.65087e+08	3.28949e+08	2.88078e+08	0.0235094	0.112868	mouse
82	185	3.28949e+08	A	0.112868	Ctnnd1;Ctnnd1;Ctnnd1	CTNND1;CTNND1 iso3 iso 2;CTNND1 iso3 iso 3	§228; §228; §228	Catenin delta-1	CTND1_MOUSE|P30999;CTND1_MOUSE|P30999-2;CTND1_MOUSE|P30999-3	http://www.phosphosite.org/proteinAction.do?id=3337&showAllSites=true	HYEDGYPGGSDNY*GSLSR	2	1027.4	6	A	42.86	3.34417e+08	3.2348e+08	3.1107e+08	2.65087e+08	3.28949e+08	2.88078e+08	0.0235094	0.112868	mouse
83	189	1.21823e+09	A	0.211122	Ctnnd1;Ctnnd1;Ctnnd1	CTNND1;CTNND1 iso3 iso 2;CTNND1 iso3 iso 3	§230; §230; §230	Catenin delta-1	CTND1_MOUSE|P30999;CTND1_MOUSE|P30999-2;CTND1_MOUSE|P30999-3	http://www.phosphosite.org/proteinAction.do?id=3337&showAllSites=true	HYEDGYPGGSDNYGS*LSR	3	685.269	10	A	43.23	1.15332e+09	1.17688e+09	1.4001e+09	1.03637e+09	1.1651e+09	1.21823e+09	0.0142943	0.211122	mouse
84	197	3.34199e+09	A	0.107613	Ctnnd1;Ctnnd1;Ctnnd1	CTNND1;CTNND1 iso3 iso 2;CTNND1 iso3 iso 3	§252; §252; §252	Catenin delta-1	CTND1_MOUSE|P30999;CTND1_MOUSE|P30999-2;CTND1_MOUSE|P30999-3	http://www.phosphosite.org/proteinAction.do?id=3337&showAllSites=true	APS*RQDVYGPQPQVR	3	593.284	24	A	34.605	3.08769e+09	3.5963e+09	3.20976e+09	2.78962e+09	3.34199e+09	2.99969e+09	0.107613	0.0990382	mouse
85	198	5.76388e+07	A	0.091619	Ctnnd1;Ctnnd1;Ctnnd1	CTNND1;CTNND1 iso3 iso 2;CTNND1 iso3 iso 3	§268, §269; §268, §269; §268, §269	Catenin delta-1	CTND1_MOUSE|P30999;CTND1_MOUSE|P30999-2;CTND1_MOUSE|P30999-3	http://www.phosphosite.org/proteinAction.do?id=3337&showAllSites=true	VGGS*S*VDLHR	2	593.736	3	A	28.6067	5.32813e+07	6.06631e+07	5.84193e+07	5.68583e+07	5.69722e+07	5.76388e+07	0.091619	0.0191501	mouse
86	201	4.87132e+08	A	0.487321	Ctnnd1;Ctnnd1;Ctnnd1	CTNND1;CTNND1 iso3 iso 2;CTNND1 iso3 iso 3	§268; §268; §268	Catenin delta-1	CTND1_MOUSE|P30999;CTND1_MOUSE|P30999-2;CTND1_MOUSE|P30999-3	http://www.phosphosite.org/proteinAction.do?id=3337&showAllSites=true	VGGS*SVDLHR	3	369.505	10	A	26.88	2.45865e+08	3.08939e+08	6.54992e+08	3.19272e+08	2.77402e+08	4.87132e+08	0.160778	0.487321	mouse
87	217	1.45141e+07	A	0.279459	Ctnnd1;Ctnnd1;Ctnnd1	CTNND1;CTNND1 iso3 iso 2;CTNND1 iso3 iso 3	§291; §291; §291	Catenin delta-1	CTND1_MOUSE|P30999;CTND1_MOUSE|P30999-2;CTND1_MOUSE|P30999-3	http://www.phosphosite.org/proteinAction.do?id=3337&showAllSites=true	SM#GY*DDLDYGMMSDYGTAR	2	1122.4	14	A	69.9225	1.34564e+07	1.43035e+07	1.73821e+07	1.1646e+07	1.38799e+07	1.45141e+07	0.0431519	0.279459	mouse
88	219	1.45141e+07	A	0.279459	Ctnnd1;Ctnnd1;Ctnnd1	CTNND1;CTNND1 iso3 iso 2;CTNND1 iso3 iso 3	§296; §296; §296	Catenin delta-1	CTND1_MOUSE|P30999;CTND1_MOUSE|P30999-2;CTND1_MOUSE|P30999-3	http://www.phosphosite.org/proteinAction.do?id=3337&showAllSites=true	SMGYDDLDY*GMM#SDYGTAR	2	1122.4	1	A	69.9225	1.34564e+07	1.43035e+07	1.73821e+07	1.1646e+07	1.38799e+07	1.45141e+07	0.0431519	0.279459	mouse
89	220	1.51526e+08	A	0.162262	Ctnnd1;Ctnnd1;Ctnnd1	CTNND1;CTNND1 iso3 iso 2;CTNND1 iso3 iso 3	§310; 310; 310	Catenin delta-1	CTND1_MOUSE|P30999;CTND1_MOUSE|P30999-2;CTND1_MOUSE|P30999-3	http://www.phosphosite.org/proteinAction.do?id=3337&showAllSites=true	RTGT*PSDPR	2	533.737	11	A	13.6475	1.3342e+08	1.68004e+08	1.40951e+08	1.62101e+08	1.50712e+08	1.51526e+08	0.162262	0.0986981	mouse
90	246	1.58393e+08	A	0.102074	Ctnnd1;Ctnnd1;Ctnnd1	CTNND1;CTNND1 iso3 iso 2;CTNND1 iso3 iso 3	§320; §320; §320	Catenin delta-1	CTND1_MOUSE|P30999;CTND1_MOUSE|P30999-2;CTND1_MOUSE|P30999-3	http://www.phosphosite.org/proteinAction.do?id=3337&showAllSites=true	LRS*YEDMIGEEVPPDQYYWAPLAQHER	4	843.881	77	A	83.5025	1.5746e+08	1.50507e+08	1.69826e+08	1.46961e+08	1.53984e+08	1.58393e+08	0.0319293	0.102074	mouse
91	251	1.58393e+08	A	0.102074	Ctnnd1;Ctnnd1;Ctnnd1	CTNND1;CTNND1 iso3 iso 2;CTNND1 iso3 iso 3	§321; §321; §321	Catenin delta-1	CTND1_MOUSE|P30999;CTND1_MOUSE|P30999-2;CTND1_MOUSE|P30999-3	http://www.phosphosite.org/proteinAction.do?id=3337&showAllSites=true	LRSY*EDMIGEEVPPDQYYWAPLAQHER	4	843.881	4	A	83.5025	1.5746e+08	1.50507e+08	1.69826e+08	1.46961e+08	1.53984e+08	1.58393e+08	0.0319293	0.102074	mouse
92	252	8.34504e+07	A	0.354061	Ctnnd1;Ctnnd1;Ctnnd1	CTNND1;CTNND1 iso3 iso 2;CTNND1 iso3 iso 3	§346, §349; §346, §349; §346, §349	Catenin delta-1	CTND1_MOUSE|P30999;CTND1_MOUSE|P30999-2;CTND1_MOUSE|P30999-3	http://www.phosphosite.org/proteinAction.do?id=3337&showAllSites=true	GS*LAS*LDSLRK	2	653.794	1	A	56.05	4.02503e+07	4.50739e+07	1.04343e+08	6.25579e+07	4.26621e+07	8.34504e+07	0.079949	0.354061	mouse
93	253	1.59867e+08	A	0.0710959	Ctnnd1;Ctnnd1;Ctnnd1	CTNND1;CTNND1 iso3 iso 2;CTNND1 iso3 iso 3	§346; §346; §346	Catenin delta-1	CTND1_MOUSE|P30999;CTND1_MOUSE|P30999-2;CTND1_MOUSE|P30999-3	http://www.phosphosite.org/proteinAction.do?id=3337&showAllSites=true	GS*LASLDSLRK	2	613.811	2	A	48.48	1.438e+08	1.59023e+08	1.60133e+08	1.59602e+08	1.51411e+08	1.59867e+08	0.0710959	0.00234908	mouse
94	255	1.59867e+08	A	0.0710959	Ctnnd1;Ctnnd1;Ctnnd1	CTNND1;CTNND1 iso3 iso 2;CTNND1 iso3 iso 3	§349; §349; §349	Catenin delta-1	CTND1_MOUSE|P30999;CTND1_MOUSE|P30999-2;CTND1_MOUSE|P30999-3	http://www.phosphosite.org/proteinAction.do?id=3337&showAllSites=true	GSLAS*LDSLRK	2	613.811	11	A	48.48	1.438e+08	1.59023e+08	1.60133e+08	1.59602e+08	1.51411e+08	1.59867e+08	0.0710959	0.00234908	mouse
95	257	1.59867e+08	A	0.0710959	Ctnnd1;Ctnnd1;Ctnnd1	CTNND1;CTNND1 iso3 iso 2;CTNND1 iso3 iso 3	§352; §352; §352	Catenin delta-1	CTND1_MOUSE|P30999;CTND1_MOUSE|P30999-2;CTND1_MOUSE|P30999-3	http://www.phosphosite.org/proteinAction.do?id=3337&showAllSites=true	GSLASLDS*LRK	2	613.811	2	A	48.48	1.438e+08	1.59023e+08	1.60133e+08	1.59602e+08	1.51411e+08	1.59867e+08	0.0710959	0.00234908	mouse
96	258	6.59396e+07	A	0.594517	Dlg1;Dlg1;Dlg1	DLG1;DLG1 iso2 iso 2;DLG1 iso3 iso 3	§440; 407; 440	Disks large homolog 1	DLG1_MOUSE|Q811D0;DLG1_MOUSE|Q811D0-2;DLG1_MOUSE|Q811D0-3	http://www.phosphosite.org/proteinAction.do?id=5282&showAllSites=true	VAKPTSM#YINDGYAPPDITNSSSQSVDNHVSPSSCLGQT*PTSPAR	4	1208.3	2	A	59.275	9.36598e+07	3.82195e+07	7.58455e+07	4.66944e+07	6.59396e+07	6.12699e+07	0.594517	0.336428	mouse
97	259	9997541	A	0.233946	Dlg1;Dlg1;Dlg1	DLG1;DLG1 iso2 iso 2;DLG1 iso3 iso 3	§442, §447; 409, 414; 442, 447	Disks large homolog 1	DLG1_MOUSE|Q811D0;DLG1_MOUSE|Q811D0-2;DLG1_MOUSE|Q811D0-3	http://www.phosphosite.org/proteinAction.do?id=5282&showAllSites=true	VAKPTSMYINDGYAPPDITNSSSQSVDNHVSPSSCLGQTPT*SPARY*SPISK	4	1393.13	1	A	67.02	8244323	11512615	10305196	9689886	9878469	9997541	0.233946	0.0435197	mouse
98	263	1.47712e+08	A	0.055524	Dlg1;Dlg1;Dlg1	DLG1;DLG1 iso2 iso 2;DLG1 iso3 iso 3	§442; 409; 442	Disks large homolog 1	DLG1_MOUSE|Q811D0;DLG1_MOUSE|Q811D0-2;DLG1_MOUSE|Q811D0-3	http://www.phosphosite.org/proteinAction.do?id=5282&showAllSites=true	VAKPTSMYINDGYAPPDITNSSSQSVDNHVSPSSCLGQTPT*SPAR	4	1204.3	7	A	39.8367	1.23685e+08	1.1434e+08	1.46117e+08	1.49306e+08	1.19013e+08	1.47712e+08	0.055524	0.0152679	mouse
99	265	1.47712e+08	A	0.055524	Dlg1;Dlg1;Dlg1	DLG1;DLG1 iso2 iso 2;DLG1 iso3 iso 3	443; 410; 443	Disks large homolog 1	DLG1_MOUSE|Q811D0;DLG1_MOUSE|Q811D0-2;DLG1_MOUSE|Q811D0-3	http://www.phosphosite.org/proteinAction.do?id=5282&showAllSites=true	VAKPTSMYINDGYAPPDITNSSSQSVDNHVSPSSCLGQTPTS*PAR	4	1204.3	4	A	39.8367	1.23685e+08	1.1434e+08	1.46117e+08	1.49306e+08	1.19013e+08	1.47712e+08	0.055524	0.0152679	mouse
100	267	3.90801e+06	A	0.387181	Dlgap4;Dlgap4	SAPAP4;SAPAP4 iso2 iso 2	§421; 421	Disks large-associated protein 4	DLGP4_MOUSE|B1AZP2;DLGP4_MOUSE|B1AZP2-2	http://www.phosphosite.org/proteinAction.do?id=6708&showAllSites=true	SLDRLDS*VDMLLPSK	3	590.29	2	A	77.99	1.40008e+06	2.45571e+06	4.60163e+06	3.21439e+06	1.9279e+06	3.90801e+06	0.387181	0.251005	mouse
101	268	2.93666e+07	A	0.307208	Dlgap4;Dlgap4;Dlgap1;Dlgap2;Dlgap3;Dlgap1;Dlgap1;Dlgap1;Dlgap1;Dlgap1;Dlgap2	SAPAP4;SAPAP4 iso2 iso 2;SAPAP1;SAPAP2;SAPAP3;SAPAP1 iso2 iso 2;SAPAP1 iso4 iso 3;SAPAP1 iso4 iso 4;SAPAP1 iso4 iso 5;SAPAP1 iso4 iso 6;SAPAP2 iso 2	§367; 367; §352; §440; §394; 352; 352; 352; 352; 352; §440	Disks large-associated protein 4	DLGP4_MOUSE|B1AZP2;DLGP4_MOUSE|B1AZP2-2;DLGP1_MOUSE|Q9D415;DLGP2_MOUSE|Q8BJ42;DLGP3_MOUSE|Q6PFD5;DLGP1_MOUSE|Q9D415-2;DLGP1_MOUSE|Q9D415-3;DLGP1_MOUSE|Q9D415-4;DLGP1_MOUSE|Q9D415-5;DLGP1_MOUSE|Q9D415-6;DLGP2_MOUSE|Q8BJ42-2	http://www.phosphosite.org/proteinAction.do?id=6708&showAllSites=true	SGS*YIK	2	367.66	1	A	22.18	2.54708e+07	3.32623e+07	2.82202e+07	1.81477e+07	2.93666e+07	2.3184e+07	0.187608	0.307208	mouse
102	269	2.93666e+07	A	0.307208	Dlgap4;Dlgap4;Dlgap1;Dlgap2;Dlgap3;Dlgap1;Dlgap1;Dlgap1;Dlgap1;Dlgap1;Dlgap2	SAPAP4;SAPAP4 iso2 iso 2;SAPAP1;SAPAP2;SAPAP3;SAPAP1 iso2 iso 2;SAPAP1 iso4 iso 3;SAPAP1 iso4 iso 4;SAPAP1 iso4 iso 5;SAPAP1 iso4 iso 6;SAPAP2 iso 2	368; 368; 353; 441; 395; 353; 353; 353; 353; 353; 441	Disks large-associated protein 4	DLGP4_MOUSE|B1AZP2;DLGP4_MOUSE|B1AZP2-2;DLGP1_MOUSE|Q9D415;DLGP2_MOUSE|Q8BJ42;DLGP3_MOUSE|Q6PFD5;DLGP1_MOUSE|Q9D415-2;DLGP1_MOUSE|Q9D415-3;DLGP1_MOUSE|Q9D415-4;DLGP1_MOUSE|Q9D415-5;DLGP1_MOUSE|Q9D415-6;DLGP2_MOUSE|Q8BJ42-2	http://www.phosphosite.org/proteinAction.do?id=6708&showAllSites=true	SGSY*IK	2	367.66	1	A	22.18	2.54708e+07	3.32623e+07	2.82202e+07	1.81477e+07	2.93666e+07	2.3184e+07	0.187608	0.307208	mouse
103	271	2.22265e+07	A	0.182643	Dlgap4;Dlgap4;Dlgap4	SAPAP4;SAPAP4 iso2 iso 2;SAPAP4 iso2 iso 3	§714; 711; 175	Disks large-associated protein 4	DLGP4_MOUSE|B1AZP2;DLGP4_MOUSE|B1AZP2-2;DLGP4_MOUSE|B1AZP2-3	http://www.phosphosite.org/proteinAction.do?id=6708&showAllSites=true	RDT*DSDTQDANDSSCK	3	632.23	7	A	12.9325	1.93367e+07	2.5072e+07	2.33966e+07	2.10564e+07	2.22044e+07	2.22265e+07	0.182643	0.0744506	mouse
104	272	10079693	A	0.215397	Dock1	DOCK1	§1637	Dedicator of cytokinesis protein 1	DOCK1_MOUSE|Q8BUR4	http://www.phosphosite.org/proteinAction.do?id=10967&showAllSites=true	SFT*M#PSSSR	2	548.212	1	A	26.34	6386415	6448346	8544470	11614916	6.41738e+06	10079693	0.00682394	0.215397	mouse
105	273	3.15131e+07	A	0.0588201	Dock1	DOCK1	§1756	Dedicator of cytokinesis protein 1	DOCK1_MOUSE|Q8BUR4	http://www.phosphosite.org/proteinAction.do?id=10967&showAllSites=true	RFS*VSPASPSSQQTPPPVTPR	3	768.378	3	A	46.5133	3.03548e+07	3.26713e+07	2.81402e+07	2.58929e+07	3.15131e+07	2.70166e+07	0.0519769	0.0588201	mouse
106	274	3.15131e+07	A	0.0588201	Dock1	DOCK1	§1758	Dedicator of cytokinesis protein 1	DOCK1_MOUSE|Q8BUR4	http://www.phosphosite.org/proteinAction.do?id=10967&showAllSites=true	RFSVS*PASPSSQQTPPPVTPR	3	768.378	2	A	46.5133	3.03548e+07	3.26713e+07	2.81402e+07	2.58929e+07	3.15131e+07	2.70166e+07	0.0519769	0.0588201	mouse
107	277	3.66479e+07	A	0.33736	Dock2	DOCK2	§1643	Dedicator of cytokinesis protein 2	DOCK2_MOUSE|Q8C3J5	http://www.phosphosite.org/proteinAction.do?id=2749&showAllSites=true	QMS*VISLASMHSDCSTPSK	3	715.972	6	A	61.9125	2.79056e+07	4.53902e+07	3.58482e+07	3.08846e+07	3.66479e+07	3.33664e+07	0.33736	0.105189	mouse
108	278	9.55433e+06	A	0.223342	Dok1	DOK1	33	Docking protein 1	DOK1_MOUSE|P97465	http://www.phosphosite.org/proteinAction.do?id=1526&showAllSites=true	TWAVLYPAS*PHGVAR	3	568.947	3	A	67.0433	9.98014e+06	9.12852e+06	1.00226e+07	7.28871e+06	9.55433e+06	8.65567e+06	0.0630277	0.223342	mouse
109	279	5.79852e+06	A	0.211773	Dok3	DOK3	§274	Docking protein 3	DOK3_MOUSE|Q9QZK7	http://www.phosphosite.org/proteinAction.do?id=7965&showAllSites=true	ALS*LPSLEPPGELR	2	779.898	1	A	88.13	6.66683e+06	4.93022e+06	5.48651e+06	4.24518e+06	5.79852e+06	4.86585e+06	0.211773	0.180391	mouse
110	280	6.72036e+07	A	0.175446	Dtl	RAMP	§716	Denticleless protein homolog	DTL_MOUSE|Q3TLR7	http://www.phosphosite.org/proteinAction.do?id=11512&showAllSites=true	RKT*QDDFCSPEHSTEL	3	677.282	2	A	39.8	5.88664e+07	7.55409e+07	5.82356e+07	5.43019e+07	6.72036e+07	5.62687e+07	0.175446	0.0494334	mouse
111	281	9.14628e+06	A	0.230109	Dtl;Dtl	RAMP;RAMP iso 2	§556; §556	Denticleless protein homolog	DTL_MOUSE|Q3TLR7;DTL_MOUSE|Q3TLR7-2	http://www.phosphosite.org/proteinAction.do?id=11512&showAllSites=true	RLDS*SCLESVK	2	687.31	1	A	37.79	8.63715e+06	9.6554e+06	8.42685e+06	6.06832e+06	9.14628e+06	7.24759e+06	0.0787218	0.230109	mouse
112	282	9.7141e+06	A	0.480351	Dvl2	DVL2	§169	Segment polarity protein dishevelled homolog DVL-2	DVL2_MOUSE|Q60838	http://www.phosphosite.org/proteinAction.do?id=8551&showAllSites=true	RRDS*SEHGAGGHRPGGPSR	4	513.986	3	A	11.59	8.20828e+06	4.046e+06	1.11733e+07	8.25491e+06	6.12714e+06	9.7141e+06	0.480351	0.212434	mouse
113	284	9.7141e+06	A	0.480351	Dvl2	DVL2	§170	Segment polarity protein dishevelled homolog DVL-2	DVL2_MOUSE|Q60838	http://www.phosphosite.org/proteinAction.do?id=8551&showAllSites=true	RRDSS*EHGAGGHRPGGPSR	4	513.986	2	A	11.59	8.20828e+06	4.046e+06	1.11733e+07	8.25491e+06	6.12714e+06	9.7141e+06	0.480351	0.212434	mouse
114	287	2.70425e+07	A	0.190484	Efs	EFS	§227	Embryonal Fyn-associated substrate	EFS_MOUSE|Q64355	http://www.phosphosite.org/proteinAction.do?id=5225&showAllSites=true	RAS*ALLNLYEAPEELLANGESR	3	832.742	8	A	103.545	2.44681e+07	2.50474e+07	3.0685e+07	2.34001e+07	2.47577e+07	2.70425e+07	0.0165459	0.190484	mouse
115	289	3.91773e+08	A	0.188649	Efs	EFS	§297	Embryonal Fyn-associated substrate	EFS_MOUSE|Q64355	http://www.phosphosite.org/proteinAction.do?id=5225&showAllSites=true	LPS*TESLSR	2	535.25	8	A	39.185	2.58334e+08	3.37864e+08	3.87016e+08	3.96531e+08	2.98099e+08	3.91773e+08	0.188649	0.0171736	mouse
116	291	1.25979e+08	A	0.0721216	Efs	EFS	§318	Embryonal Fyn-associated substrate	EFS_MOUSE|Q64355	http://www.phosphosite.org/proteinAction.do?id=5225&showAllSites=true	RPLPALPVSEAPAPS*PAPSPAPGR	3	804.753	9	A	56.35	1.13148e+08	1.09048e+08	1.32403e+08	1.19554e+08	1.11098e+08	1.25979e+08	0.026094	0.0721216	mouse
117	294	2.28545e+07	A	0.233829	Efs	EFS	§322	Embryonal Fyn-associated substrate	EFS_MOUSE|Q64355	http://www.phosphosite.org/proteinAction.do?id=5225&showAllSites=true	RPLPALPVSEAPAPSPAPS*PAPGRK	3	847.451	3	A	51.565	2.24243e+07	2.10676e+07	1.90756e+07	2.66333e+07	2.1746e+07	2.28545e+07	0.0441169	0.233829	mouse
118	295	119909916	A	0.012043	Efs	EFS	287	Embryonal Fyn-associated substrate	EFS_MOUSE|Q64355	http://www.phosphosite.org/proteinAction.do?id=5225&showAllSites=true	SS*PPQHRPR	3	381.18	1	A	11.79	89661008		120931032	118888800	89661008	119909916		0.012043	mouse
119	296	2.76458e+06	A	0.32169	Enah;Enah;Enah	Mena;Mena iso4 iso 4;Mena iso 5	§355; 336; 340	Protein enabled homolog	ENAH_MOUSE|Q03173;ENAH_MOUSE|Q03173-4;ENAH_MOUSE|Q03173-5	http://www.phosphosite.org/proteinAction.do?id=2818&showAllSites=true	PSS*PVNTPSSQPPAAK	2	822.885	3	A	24.44	1.73056e+06	1.84511e+06	2.13572e+06	3.39343e+06	1.78783e+06	2.76458e+06	0.0453057	0.32169	mouse
120	297	8.08383e+06	A	0.18484	Enah;Enah;Enah;Enah;Enah	Mena;Mena iso3 iso 3;Mena iso4 iso 4;Mena iso 5;Mena iso 6	§144; §125; §125; 129; 125	Protein enabled homolog	ENAH_MOUSE|Q03173;ENAH_MOUSE|Q03173-3;ENAH_MOUSE|Q03173-4;ENAH_MOUSE|Q03173-5;ENAH_MOUSE|Q03173-6	http://www.phosphosite.org/proteinAction.do?id=2818&showAllSites=true	QNS*QLPAQVQNGPSQEELEIQR	3	858.405	2	A	60.055	2987666	3886077	7942393	8225276	3.43687e+06	8.08383e+06	0.18484	0.0247443	mouse
121	298	2.23748e+08	A	0.207786	Enah;Enah;Enah;Enah;Enah;Enah	Mena;Mena iso 2;Mena iso3 iso 3;Mena iso4 iso 4;Mena iso 5;Mena iso 6	§720; 308; 459; 701; 705; 425	Protein enabled homolog	ENAH_MOUSE|Q03173;ENAH_MOUSE|Q03173-2;ENAH_MOUSE|Q03173-3;ENAH_MOUSE|Q03173-4;ENAH_MOUSE|Q03173-5;ENAH_MOUSE|Q03173-6	http://www.phosphosite.org/proteinAction.do?id=2818&showAllSites=true	APSTS*TPEPTR	2	612.269	1	A	16.63	1.25757e+08	1.69076e+08	2.27111e+08	2.20384e+08	1.47416e+08	2.23748e+08	0.207786	0.0212589	mouse
122	301	2.23748e+08	A	0.207786	Enah;Enah;Enah;Enah;Enah;Enah	Mena;Mena iso 2;Mena iso3 iso 3;Mena iso4 iso 4;Mena iso 5;Mena iso 6	§721; 309; §460; §702; 706; 426	Protein enabled homolog	ENAH_MOUSE|Q03173;ENAH_MOUSE|Q03173-2;ENAH_MOUSE|Q03173-3;ENAH_MOUSE|Q03173-4;ENAH_MOUSE|Q03173-5;ENAH_MOUSE|Q03173-6	http://www.phosphosite.org/proteinAction.do?id=2818&showAllSites=true	APSTST*PEPTR	2	612.269	8	A	16.63	1.25757e+08	1.69076e+08	2.27111e+08	2.20384e+08	1.47416e+08	2.23748e+08	0.207786	0.0212589	mouse
123	302	7.75226e+07	A	0.292229	Enah;Enah;Enah;Enah;Enah;Enah	Mena;Mena iso 2;Mena iso3 iso 3;Mena iso4 iso 4;Mena iso 5;Mena iso 6	§734, §738; 322, 326; §473, §477; §715, §719; §719, 723; 439, 443	Protein enabled homolog	ENAH_MOUSE|Q03173;ENAH_MOUSE|Q03173-2;ENAH_MOUSE|Q03173-3;ENAH_MOUSE|Q03173-4;ENAH_MOUSE|Q03173-5;ENAH_MOUSE|Q03173-6	http://www.phosphosite.org/proteinAction.do?id=2818&showAllSites=true	TNT*MNGS*KSPVISRPK	3	626.284	4	A	26.1	4.18498e+07	6.365e+07	7.93824e+07	7.56628e+07	5.27499e+07	7.75226e+07	0.292229	0.0339278	mouse
124	305	5.37142e+07	A	0.0292008	Epb41l1;Epb41l1;Epb41l1	EPB41L1;EPB41L1 iso4 iso 2;EPB41L1 iso4 iso 3	§540, §541; 528, 529; 528, 529	Band 4.1-like protein 1	E41L1_MOUSE|Q9Z2H5;E41L1_MOUSE|Q9Z2H5-2;E41L1_MOUSE|Q9Z2H5-3	http://www.phosphosite.org/proteinAction.do?id=6633&showAllSites=true	RLPS*S*PASPSPK	2	692.307	6	A	28.6575	5.32777e+07	5.41508e+07	4.8173e+07	5.02043e+07	5.37142e+07	4.91887e+07	0.0114939	0.0292008	mouse
125	306	5.37142e+07	A	0.0292008	Epb41l1;Epb41l1;Epb41l1	EPB41L1;EPB41L1 iso4 iso 2;EPB41L1 iso4 iso 3	§540, §544; 528, 532; 528, 532	Band 4.1-like protein 1	E41L1_MOUSE|Q9Z2H5;E41L1_MOUSE|Q9Z2H5-2;E41L1_MOUSE|Q9Z2H5-3	http://www.phosphosite.org/proteinAction.do?id=6633&showAllSites=true	RLPS*SPAS*PSPK	2	692.307	1	A	28.6575	5.32777e+07	5.41508e+07	4.8173e+07	5.02043e+07	5.37142e+07	4.91887e+07	0.0114939	0.0292008	mouse
126	308	1.05959e+07	A	0.0688901	Epb41l1;Epb41l1;Epb41l1	EPB41L1;EPB41L1 iso4 iso 2;EPB41L1 iso4 iso 3	§540; 528; 528	Band 4.1-like protein 1	E41L1_MOUSE|Q9Z2H5;E41L1_MOUSE|Q9Z2H5-2;E41L1_MOUSE|Q9Z2H5-3	http://www.phosphosite.org/proteinAction.do?id=6633&showAllSites=true	RLPS*SPASPSPK	3	435.218	2	A	22.955	4093963	4513243	10636577	10555246	4303603	1.05959e+07	0.0688901	0.00542754	mouse
127	311	1.10028e+08	A	0.154575	Epb41l1;Epb41l1;Epb41l1	EPB41L1;EPB41L1 iso4 iso 2;EPB41L1 iso4 iso 3	§541; 529; 529	Band 4.1-like protein 1	E41L1_MOUSE|Q9Z2H5;E41L1_MOUSE|Q9Z2H5-2;E41L1_MOUSE|Q9Z2H5-3	http://www.phosphosite.org/proteinAction.do?id=6633&showAllSites=true	RLPSS*PASPSPK	2	652.324	9	A	23.585	6.65073e+07	8.28301e+07	1.08141e+08	1.11916e+08	7.46687e+07	1.10028e+08	0.154575	0.0242618	mouse
128	313	4.30822e+07	A	0.149665	Eps15l1;Pla2g4a;Pdlim5;Eps15l1;Akap9;Akap9;Akap9;Pdlim5;Pdlim5;Arl5b;Cep112;Clec4g;Dpyd;Gen1;Rabgap1;Rcbtb2;Cep112;Eps15l1;Eps15l1;Gen1	EPS15R;cPLA2;LIM;EPS15R iso 2;AKAP9;AKAP9 iso 2;AKAP9 iso 3;LIM iso3 iso 2;LIM iso3 iso 3;ARL5B;CCDC46;CLEC4G;DPYD;GEN1;RABGAP1;RCBTB2;Cep112 iso 2;EPS15R iso 3;EPS15R iso 4;GEN1 iso 2	476; 313; 31; 476; 2889; 2871; 2889; 31; 31; 145; 828; 82; 269; 185; §1050; 21; 47; 476; 476; 120	Epidermal growth factor receptor substrate 15-like 1	EP15R_MOUSE|Q60902;PA24A_MOUSE|P47713;PDLI5_MOUSE|Q8CI51;EP15R_MOUSE|Q60902-2;AKAP9_MOUSE|Q70FJ1;AKAP9_MOUSE|Q70FJ1-2;AKAP9_MOUSE|Q70FJ1-3;PDLI5_MOUSE|Q8CI51-2;PDLI5_MOUSE|Q8CI51-3;ARL5B_MOUSE|Q9D4P0;CE112_MOUSE|Q5PR68;CLC4G_MOUSE|Q8BNX1;DPYD_MOUSE|Q8CHR6;GEN_MOUSE|Q8BMI4;RBGP1_MOUSE|A2AWA9;RCBT2_MOUSE|Q99LJ7;CE112_MOUSE|Q5PR68-2;EP15R_MOUSE|Q60902-3;EP15R_MOUSE|Q60902-4;GEN_MOUSE|Q8BMI4-2	http://www.phosphosite.org/proteinAction.do?id=3028&showAllSites=true	TIS*SLK	2	364.683	1	A	33.37	2.14471e+07	2.65238e+07	4.51942e+07	4.09702e+07	2.39855e+07	4.30822e+07	0.149665	0.069329	mouse
129	314	1.09034e+07	A	0.495518	Eps8	EPS8	§658	Epidermal growth factor receptor kinase substrate 8	EPS8_MOUSE|Q08509	http://www.phosphosite.org/proteinAction.do?id=4382&showAllSites=true	QNS*SSSDSGGSIVR	2	730.804	3	A	24.02	8975102	12831641	3641274	7569266	1.09034e+07	5605270	0.250105	0.495518	mouse
130	315	8.17091e+08	A	0.25043	Erc1;Erc1	ERC1;ERC1 iso2 iso 2	§15, §21; 15, 21	ELKS/Rab6-interacting/CAST family member 1	RB6I2_MOUSE|Q99MI1;RB6I2_MOUSE|Q99MI1-2	http://www.phosphosite.org/proteinAction.do?id=12141&showAllSites=true	VEPSS*QSPGRS*PR	3	515.215	3	A	16.03	4.20314e+08	6.01205e+08	8.7984e+08	7.54342e+08	5.1076e+08	8.17091e+08	0.25043	0.108606	mouse
131	317	1.83759e+08	A	0.0995548	Erc1;Erc1	ERC1;ERC1 iso2 iso 2	§15; 15	ELKS/Rab6-interacting/CAST family member 1	RB6I2_MOUSE|Q99MI1;RB6I2_MOUSE|Q99MI1-2	http://www.phosphosite.org/proteinAction.do?id=12141&showAllSites=true	VEPSS*QSPGR	2	562.243	4	A	14.5133	1.30629e+08	1.50414e+08	1.89434e+08	1.78084e+08	1.40522e+08	1.83759e+08	0.0995548	0.0436742	mouse
132	320	8.17091e+08	A	0.25043	Erc1;Erc1	ERC1;ERC1 iso2 iso 2	§17, §21; 17, 21	ELKS/Rab6-interacting/CAST family member 1	RB6I2_MOUSE|Q99MI1;RB6I2_MOUSE|Q99MI1-2	http://www.phosphosite.org/proteinAction.do?id=12141&showAllSites=true	VEPSSQS*PGRS*PR	3	515.215	7	A	16.03	4.20314e+08	6.01205e+08	8.7984e+08	7.54342e+08	5.1076e+08	8.17091e+08	0.25043	0.108606	mouse
133	321	1.83759e+08	A	0.0995548	Erc1;Erc1	ERC1;ERC1 iso2 iso 2	§17; 17	ELKS/Rab6-interacting/CAST family member 1	RB6I2_MOUSE|Q99MI1;RB6I2_MOUSE|Q99MI1-2	http://www.phosphosite.org/proteinAction.do?id=12141&showAllSites=true	VEPSSQS*PGR	2	562.243	3	A	14.5133	1.30629e+08	1.50414e+08	1.89434e+08	1.78084e+08	1.40522e+08	1.83759e+08	0.0995548	0.0436742	mouse
134	322	5.02105e+08	A	0.210992	Erc1;Erc1	ERC1;ERC1 iso2 iso 2	§21; 21	ELKS/Rab6-interacting/CAST family member 1	RB6I2_MOUSE|Q99MI1;RB6I2_MOUSE|Q99MI1-2	http://www.phosphosite.org/proteinAction.do?id=12141&showAllSites=true	VEPSSQSPGRS*PR	2	732.336	6	A	15.25	4.27194e+08	5.77016e+08	4.6939e+08	4.42458e+08	5.02105e+08	4.55924e+08	0.210992	0.0417708	mouse
135	328	1.71312e+08	A	0.038331	Erc1;Erc1	ERC1;ERC1 iso2 iso 2	§38; 38	ELKS/Rab6-interacting/CAST family member 1	RB6I2_MOUSE|Q99MI1;RB6I2_MOUSE|Q99MI1-2	http://www.phosphosite.org/proteinAction.do?id=12141&showAllSites=true	TNST*GGSSGNSVGGGSGK	2	795.823	1	A	12.85	1.59193e+08	1.68063e+08	1.72931e+08	1.69693e+08	1.63628e+08	1.71312e+08	0.038331	0.0133648	mouse
136	329	1.58033e+07	A	0.257473	Erc1;Erc1	ERC1;ERC1 iso2 iso 2	§7, §15; 7, 15	ELKS/Rab6-interacting/CAST family member 1	RB6I2_MOUSE|Q99MI1;RB6I2_MOUSE|Q99MI1-2	http://www.phosphosite.org/proteinAction.do?id=12141&showAllSites=true	S*VGKVEPSS*QSPGR	2	787.834	2	A	21.455	1.19298e+07	1.72406e+07	1.63929e+07	1.52138e+07	1.45852e+07	1.58033e+07	0.257473	0.0527558	mouse
137	330	1.58033e+07	A	0.257473	Erc1;Erc1	ERC1;ERC1 iso2 iso 2	§7, §17; 7, 17	ELKS/Rab6-interacting/CAST family member 1	RB6I2_MOUSE|Q99MI1;RB6I2_MOUSE|Q99MI1-2	http://www.phosphosite.org/proteinAction.do?id=12141&showAllSites=true	S*VGKVEPSSQS*PGR	2	787.834	1	A	21.455	1.19298e+07	1.72406e+07	1.63929e+07	1.52138e+07	1.45852e+07	1.58033e+07	0.257473	0.0527558	mouse
138	332	1.09048e+07	A	0.253804	Erc1;Erc1	ERC1;ERC1 iso2 iso 2	§7; 7	ELKS/Rab6-interacting/CAST family member 1	RB6I2_MOUSE|Q99MI1;RB6I2_MOUSE|Q99MI1-2	http://www.phosphosite.org/proteinAction.do?id=12141&showAllSites=true	S*VGKVEPSSQSPGR	3	498.903	7	A	20.495	6888103	9901223	12647341	9162228	8394663	1.09048e+07	0.253804	0.225988	mouse
139	333	3.44671e+07	A	0.183343	Fchsd2;Fchsd2;Fchsd2	FCHSD2;FCHSD2 iso2 iso 2;FCHSD2 iso2 iso 3	§675; 699; 661	F-BAR and double SH3 domains protein 2	FCSD2_MOUSE|Q3USJ8;FCSD2_MOUSE|Q3USJ8-2;FCSD2_MOUSE|Q3USJ8-3	http://www.phosphosite.org/proteinAction.do?id=11298&showAllSites=true	RSS*QFFPR	2	552.753	3	A	40.9933	2.5284e+07	2.61596e+07	3.89355e+07	2.99987e+07	2.57218e+07	3.44671e+07	0.0240716	0.183343	mouse
140	337	39243268	A	0.136524	Fchsd2;Fchsd2;Fchsd2	FCHSD2;FCHSD2 iso2 iso 2;FCHSD2 iso2 iso 3	§681; 705; 667	F-BAR and double SH3 domains protein 2	FCSD2_MOUSE|Q3USJ8;FCSD2_MOUSE|Q3USJ8-2;FCSD2_MOUSE|Q3USJ8-3	http://www.phosphosite.org/proteinAction.do?id=11298&showAllSites=true	SSQFFPRS*PSANENSLHAESPGFSQASR	4	776.348	13	A	47.0175	42232272	36254264	39912564	32884932	39243268	36398748	0.107715	0.136524	mouse
141	338	1.68495e+07	A	0.212926	Fchsd2;Fchsd2;Fchsd2	FCHSD2;FCHSD2 iso2 iso 2;FCHSD2 iso2 iso 3	§683; 707; 669	F-BAR and double SH3 domains protein 2	FCSD2_MOUSE|Q3USJ8;FCSD2_MOUSE|Q3USJ8-2;FCSD2_MOUSE|Q3USJ8-3	http://www.phosphosite.org/proteinAction.do?id=11298&showAllSites=true	SPS*ANENSLHAESPGFSQASR	2	1126.98	1	A	41.53	1.45836e+07	1.91153e+07	1.84382e+07	1.36126e+07	1.68495e+07	1.60254e+07	0.190177	0.212926	mouse
142	339	39243268	A	0.136524	Fchsd2;Fchsd2;Fchsd2	FCHSD2;FCHSD2 iso2 iso 2;FCHSD2 iso2 iso 3	688; 712; 674	F-BAR and double SH3 domains protein 2	FCSD2_MOUSE|Q3USJ8;FCSD2_MOUSE|Q3USJ8-2;FCSD2_MOUSE|Q3USJ8-3	http://www.phosphosite.org/proteinAction.do?id=11298&showAllSites=true	SSQFFPRSPSANENS*LHAESPGFSQASR	4	776.348	1	A	47.0175	42232272	36254264	39912564	32884932	39243268	36398748	0.107715	0.136524	mouse
143	342	1.84894e+07	A	0.308371	Frs2	FRS2	§177	Fibroblast growth factor receptor substrate 2	FRS2_MOUSE|Q8C180	http://www.phosphosite.org/proteinAction.do?id=1636&showAllSites=true	LPS*VGEESTHPLLVAEEQVHTYVNTTGVQEER	4	907.935	4	A	88.46	2.0857e+07	1.61218e+07	5.92789e+06	3.80551e+06	1.84894e+07	4.8667e+06	0.181091	0.308371	mouse
144	343	5.88954e+07	A	0.0118169	Frs2	FRS2	§327	Fibroblast growth factor receptor substrate 2	FRS2_MOUSE|Q8C180	http://www.phosphosite.org/proteinAction.do?id=1636&showAllSites=true	LTS*TSTSDTQNINNSAQR	2	1009.44	7	A	27.78	5.85871e+07	5.92037e+07	5.43042e+07	5.52193e+07	5.88954e+07	5.47618e+07	0.0074028	0.0118169	mouse
145	345	5.88954e+07	A	0.0118169	Frs2	FRS2	§328	Fibroblast growth factor receptor substrate 2	FRS2_MOUSE|Q8C180	http://www.phosphosite.org/proteinAction.do?id=1636&showAllSites=true	LTST*STSDTQNINNSAQR	2	1009.44	1	A	27.78	5.85871e+07	5.92037e+07	5.43042e+07	5.52193e+07	5.88954e+07	5.47618e+07	0.0074028	0.0118169	mouse
146	346	2.8402e+06	A	0.0729377	Frs2	FRS2	§354	Fibroblast growth factor receptor substrate 2	FRS2_MOUSE|Q8C180	http://www.phosphosite.org/proteinAction.do?id=1636&showAllSites=true	RPALLNYENLPS*LPPVWEAR	3	805.745	2	A	97.875	2986679	2693714		89426	2.8402e+06	89426	0.0729377		mouse
147	347	2.24572e+07	A	0.127142	Frs2	FRS2	§365	Fibroblast growth factor receptor substrate 2	FRS2_MOUSE|Q8C180	http://www.phosphosite.org/proteinAction.do?id=1636&showAllSites=true	KLS*RDEDDNLGPK	3	522.91	2	A	22.69	2.04382e+07	2.44762e+07	1.6691e+07	1.70665e+07	2.24572e+07	1.68787e+07	0.127142	0.0157298	mouse
148	349	9.0165e+07	A	0.211107	Frs2	FRS2	§428	Fibroblast growth factor receptor substrate 2	FRS2_MOUSE|Q8C180	http://www.phosphosite.org/proteinAction.do?id=1636&showAllSites=true	RPS*LEHR	3	325.49	4	A	14.88	6.31769e+07	6.6043e+07	1.03624e+08	7.67056e+07	6.461e+07	9.0165e+07	0.0313671	0.211107	mouse
149	350	1.84894e+07	A	0.308371	Frs2	FRS2	183	Fibroblast growth factor receptor substrate 2	FRS2_MOUSE|Q8C180	http://www.phosphosite.org/proteinAction.do?id=1636&showAllSites=true	LPSVGEEST*HPLLVAEEQVHTYVNTTGVQEER	4	907.935	2	A	88.46	2.0857e+07	1.61218e+07	5.92789e+06	3.80551e+06	1.84894e+07	4.8667e+06	0.181091	0.308371	mouse
150	351	1.52202e+08	A	0.0769313	Gab1	GAB1	§552	GRB2-associated-binding protein 1	GAB1_MOUSE|Q9QYY0	http://www.phosphosite.org/proteinAction.do?id=1645&showAllSites=true	VKPAPLDIKPLSEWEELQAPVRS*PITR	4	788.174	2	A	81.95	1.60482e+08	1.43923e+08	6.04864e+07	5.75179e+07	1.52202e+08	5.90022e+07	0.0769313	0.0355757	mouse
151	355	3.68689e+07	A	0.309061	Gab2	GAB2	§388	GRB2-associated-binding protein 2	GAB2_MOUSE|Q9Z1S8	http://www.phosphosite.org/proteinAction.do?id=1650&showAllSites=true	RNT*LPAMDNSR	3	452.203	6	A	32.0667	1.82897e+07	1.82293e+07	4.49261e+07	2.88116e+07	1.82595e+07	3.68689e+07	0.00234151	0.309061	mouse
152	356	4.42056e+07	A	0.132826	Gab2	GAB2	§402	GRB2-associated-binding protein 2	GAB2_MOUSE|Q9Z1S8	http://www.phosphosite.org/proteinAction.do?id=1650&showAllSites=true	ASS*CETYEYPAR	2	757.287	4	A	36.5	3.1344e+07	3.78421e+07	4.77689e+07	4.06422e+07	3.45931e+07	4.42056e+07	0.132826	0.113997	mouse
153	361	1.50674e+08	A	0.141699	Gab2	GAB2	§612	GRB2-associated-binding protein 2	GAB2_MOUSE|Q9Z1S8	http://www.phosphosite.org/proteinAction.do?id=1650&showAllSites=true	STGSVDYLALDFQPGS*PSPHR	3	771.018	9	A	78.9975	1.60689e+08	1.40659e+08	1.19147e+08	9.74453e+07	1.50674e+08	1.08296e+08	0.0940015	0.141699	mouse
154	362	2.24124e+07	A	0.174312	Gab2	GAB2	§620	GRB2-associated-binding protein 2	GAB2_MOUSE|Q9Z1S8	http://www.phosphosite.org/proteinAction.do?id=1650&showAllSites=true	KPS*TSSVTSDEK	2	673.298	4	A	15.6875	1.71173e+07	2.19302e+07	2.1137e+07	2.36878e+07	1.95237e+07	2.24124e+07	0.174312	0.0804745	mouse
155	363	8.23455e+06	A	0.331607	Gab2	GAB2	622, 625	GRB2-associated-binding protein 2	GAB2_MOUSE|Q9Z1S8	http://www.phosphosite.org/proteinAction.do?id=1650&showAllSites=true	KPSTS*SVT*SDEKVDYVQVDK	3	791.348	1	A	44.83	7.49077e+06	8.97833e+06	6.66284e+06	4.13171e+06	8.23455e+06	5.39727e+06	0.127738	0.331607	mouse
156	364	1.61322e+06	A	0.84418	Grb10;Grb10;Grb10	GRB10;GRB10 iso 2;GRB10 iso 3	§503; 478; 423	Growth factor receptor-bound protein 10	GRB10_MOUSE|Q60760;GRB10_MOUSE|Q60760-2;GRB10_MOUSE|Q60760-3	http://www.phosphosite.org/proteinAction.do?id=1670&showAllSites=true	M#NILSSQS*PLHPSTLNAVIHR	3	804.402	1	A	66.76		1.61322e+06	394352	1.56237e+06	1.61322e+06	978359		0.84418	mouse
157	365	2.98247e+07	A	0.254688	Grip1;Grip1;Grip1;Grip1	GRIP1;GRIP1 iso2 iso 2;GRIP1 iso3 iso 3;LGALS12 iso 4	§952; 859; 858; 457	Glutamate receptor-interacting protein 1	GRIP1_MOUSE|Q925T6;GRIP1_MOUSE|Q925T6-2;GRIP1_MOUSE|Q925T6-3;GRIP1_MOUSE|Q925T6-4	http://www.phosphosite.org/proteinAction.do?id=17435&showAllSites=true	QAS*FQER	2	473.195	2	A	21.365	1.16711e+07	1.4999e+07	3.51959e+07	2.44536e+07	1.33351e+07	2.98247e+07	0.176465	0.254688	mouse
158	366	7.76505e+07	A	0.0743153	Grip1;Grip1;Grip1;Grip1	GRIP1;GRIP1 iso2 iso 2;GRIP1 iso3 iso 3;LGALS12 iso 4	§971; 878; 877; 476	Glutamate receptor-interacting protein 1	GRIP1_MOUSE|Q925T6;GRIP1_MOUSE|Q925T6-2;GRIP1_MOUSE|Q925T6-3;GRIP1_MOUSE|Q925T6-4	http://www.phosphosite.org/proteinAction.do?id=17435&showAllSites=true	SNT*LPSDVGR	2	563.25	4	A	34.3675	4.72131e+07	5.24503e+07	7.74427e+07	7.78583e+07	4.98317e+07	7.76505e+07	0.0743153	0.00378418	mouse
159	368	1.09766e+09	A	0.138636	Irs1	IRS1	§1096	Insulin receptor substrate 1	IRS1_MOUSE|P35569	http://www.phosphosite.org/proteinAction.do?id=854&showAllSites=true	RHS*SETFSAPTR	3	485.884	4	A	20.8433	8.71317e+08	1.05522e+09	1.20527e+09	9.90059e+08	9.63269e+08	1.09766e+09	0.134997	0.138636	mouse
160	372	2.54479e+07	A	0.127496	Irs1	IRS1	§1096, §1097	Insulin receptor substrate 1	IRS1_MOUSE|P35569	http://www.phosphosite.org/proteinAction.do?id=854&showAllSites=true	RHS*S*ETFSAPTR	3	512.539	10	A	25.02	2.33305e+07	2.75654e+07	2.66127e+07	2.22111e+07	2.54479e+07	2.44119e+07	0.117674	0.127496	mouse
161	376	1.09766e+09	A	0.138636	Irs1	IRS1	§1097	Insulin receptor substrate 1	IRS1_MOUSE|P35569	http://www.phosphosite.org/proteinAction.do?id=854&showAllSites=true	RHSS*ETFSAPTR	3	485.884	14	A	20.8433	8.71317e+08	1.05522e+09	1.20527e+09	9.90059e+08	9.63269e+08	1.09766e+09	0.134997	0.138636	mouse
162	379	5.06344e+07	A	0.18234	Irs1	IRS1	§1097, §1099	Insulin receptor substrate 1	IRS1_MOUSE|P35569	http://www.phosphosite.org/proteinAction.do?id=854&showAllSites=true	RRHSS*ET*FSAPTR	3	564.573	1	A	20.08	5.33598e+07	4.7909e+07	4.80622e+07	3.7084e+07	5.06344e+07	4.25731e+07	0.0761198	0.18234	mouse
163	380	3.33643e+08	A	0.304758	Irs1	IRS1	§1099	Insulin receptor substrate 1	IRS1_MOUSE|P35569	http://www.phosphosite.org/proteinAction.do?id=854&showAllSites=true	RRHSSET*FSAPTR	4	403.69	3	A	18.91	3.95948e+08	2.55552e+08	3.72782e+08	2.94504e+08	3.2575e+08	3.33643e+08	0.304758	0.165897	mouse
164	381	60882006	A	0.109039	Irs1	IRS1	§1214	Insulin receptor substrate 1	IRS1_MOUSE|P35569	http://www.phosphosite.org/proteinAction.do?id=854&showAllSites=true	RSS*EDLSNYASISFQK	2	956.428	1	A	62.98	58762476	63001536	57231868	49038200	60882006	53135034	0.0492341	0.109039	mouse
165	383	4.98086e+08	A	0.0695779	Irs1	IRS1	§265	Insulin receptor substrate 1	IRS1_MOUSE|P35569	http://www.phosphosite.org/proteinAction.do?id=854&showAllSites=true	S*QSSSSCSNPISVPLR	2	893.395	19	A	52.5325	4.73581e+08	5.22592e+08	4.63974e+08	4.97112e+08	4.98086e+08	4.80543e+08	0.0695779	0.0487624	mouse
166	388	4.97658e+07	A	0.131755	Irs1	IRS1	§272	Insulin receptor substrate 1	IRS1_MOUSE|P35569	http://www.phosphosite.org/proteinAction.do?id=854&showAllSites=true	SQSSSSCS*NPISVPLR	3	595.933	1	A	57.89	5.24517e+07	4.35113e+07	4.57132e+07	5.38184e+07	4.79815e+07	4.97658e+07	0.131755	0.115165	mouse
167	389	2.38927e+07	A	0.217545	Irs1	IRS1	§302	Insulin receptor substrate 1	IRS1_MOUSE|P35569	http://www.phosphosite.org/proteinAction.do?id=854&showAllSites=true	TES*ITATSPASM#VGGKPGSFR	3	726.336	1	A	47.51	2.75681e+07	2.02173e+07	2.18005e+07	1.85487e+07	2.38927e+07	2.01746e+07	0.217545	0.113974	mouse
168	392	1.00038e+08	A	0.153778	Irs1	IRS1	§302, §306	Insulin receptor substrate 1	IRS1_MOUSE|P35569	http://www.phosphosite.org/proteinAction.do?id=854&showAllSites=true	TES*ITAT*SPASMVGGKPGSFR	3	747.66	4	A	57.2267	7.46966e+07	9.29232e+07	1.07329e+08	9.2746e+07	8.38099e+07	1.00038e+08	0.153778	0.10308	mouse
169	393	1.47536e+07	A	0.0728029	Irs1	IRS1	§302, §307	Insulin receptor substrate 1	IRS1_MOUSE|P35569	http://www.phosphosite.org/proteinAction.do?id=854&showAllSites=true	TES*ITATS*PASM#VGGKPGSFR	3	752.992	2	A	48.215	1.32522e+07	1.28415e+07	1.55131e+07	1.39941e+07	1.30469e+07	1.47536e+07	0.0222566	0.0728029	mouse
170	395	1.00038e+08	A	0.153778	Irs1	IRS1	§302, 304	Insulin receptor substrate 1	IRS1_MOUSE|P35569	http://www.phosphosite.org/proteinAction.do?id=854&showAllSites=true	TES*IT*ATSPASMVGGKPGSFR	3	747.66	3	A	57.2267	7.46966e+07	9.29232e+07	1.07329e+08	9.2746e+07	8.38099e+07	1.00038e+08	0.153778	0.10308	mouse
171	400	4.81842e+08	A	0.12036	Irs1	IRS1	§306	Insulin receptor substrate 1	IRS1_MOUSE|P35569	http://www.phosphosite.org/proteinAction.do?id=854&showAllSites=true	TESITAT*SPASMVGGKPGSFR	3	721.005	11	A	49	4.40834e+08	5.22851e+08	4.85978e+08	4.22163e+08	4.81842e+08	4.5407e+08	0.12036	0.0993763	mouse
172	405	1.80759e+08	A	0.123754	Irs1	IRS1	§306, §307	Insulin receptor substrate 1	IRS1_MOUSE|P35569	http://www.phosphosite.org/proteinAction.do?id=854&showAllSites=true	SRTESITAT*S*PASMVGGKPGSFR	3	828.705	9	A	53.395	1.64942e+08	1.96577e+08	1.51977e+08	1.37289e+08	1.80759e+08	1.44633e+08	0.123754	0.0718053	mouse
173	415	4.81842e+08	A	0.12036	Irs1	IRS1	§307	Insulin receptor substrate 1	IRS1_MOUSE|P35569	http://www.phosphosite.org/proteinAction.do?id=854&showAllSites=true	TESITATS*PASMVGGKPGSFR	3	721.005	25	A	49	4.40834e+08	5.22851e+08	4.85978e+08	4.22163e+08	4.81842e+08	4.5407e+08	0.12036	0.0993763	mouse
174	416	1.00038e+08	A	0.153778	Irs1	IRS1	§307, §318	Insulin receptor substrate 1	IRS1_MOUSE|P35569	http://www.phosphosite.org/proteinAction.do?id=854&showAllSites=true	TESITATS*PASMVGGKPGS*FR	3	747.66	1	A	57.2267	7.46966e+07	9.29232e+07	1.07329e+08	9.2746e+07	8.38099e+07	1.00038e+08	0.153778	0.10308	mouse
175	418	9.05078e+07	A	0.121974	Irs1	IRS1	§324	Insulin receptor substrate 1	IRS1_MOUSE|P35569	http://www.phosphosite.org/proteinAction.do?id=854&showAllSites=true	AS*SDGEGTMSRPASVDGSPVSPSTNR	3	877.045	3	A	24.165	8.27017e+07	9.8314e+07	8.67921e+07	7.81194e+07	9.05078e+07	8.24557e+07	0.121974	0.0743731	mouse
176	419	2.1177e+08	A	0.043986	Irs1	IRS1	§324, §325	Insulin receptor substrate 1	IRS1_MOUSE|P35569	http://www.phosphosite.org/proteinAction.do?id=854&showAllSites=true	AS*S*DGEGTMSRPASVDGSPVSPSTNR	3	903.7	3	A	36.285	2.05183e+08	2.18356e+08	1.94038e+08	1.85246e+08	2.1177e+08	1.89642e+08	0.043986	0.032781	mouse
177	420	2.1177e+08	A	0.043986	Irs1	IRS1	§324, §343	Insulin receptor substrate 1	IRS1_MOUSE|P35569	http://www.phosphosite.org/proteinAction.do?id=854&showAllSites=true	AS*SDGEGTMSRPASVDGSPVS*PSTNR	3	903.7	1	A	36.285	2.05183e+08	2.18356e+08	1.94038e+08	1.85246e+08	2.1177e+08	1.89642e+08	0.043986	0.032781	mouse
178	421	2.1177e+08	A	0.043986	Irs1	IRS1	§324, 330	Insulin receptor substrate 1	IRS1_MOUSE|P35569	http://www.phosphosite.org/proteinAction.do?id=854&showAllSites=true	AS*SDGEGT*MSRPASVDGSPVSPSTNR	3	903.7	1	A	36.285	2.05183e+08	2.18356e+08	1.94038e+08	1.85246e+08	2.1177e+08	1.89642e+08	0.043986	0.032781	mouse
179	424	9.05078e+07	A	0.121974	Irs1	IRS1	§325	Insulin receptor substrate 1	IRS1_MOUSE|P35569	http://www.phosphosite.org/proteinAction.do?id=854&showAllSites=true	ASS*DGEGTMSRPASVDGSPVSPSTNR	3	877.045	7	A	24.165	8.27017e+07	9.8314e+07	8.67921e+07	7.81194e+07	9.05078e+07	8.24557e+07	0.121974	0.0743731	mouse
180	425	2.1177e+08	A	0.043986	Irs1	IRS1	§325, §336	Insulin receptor substrate 1	IRS1_MOUSE|P35569	http://www.phosphosite.org/proteinAction.do?id=854&showAllSites=true	ASS*DGEGTMSRPAS*VDGSPVSPSTNR	3	903.7	1	A	36.285	2.05183e+08	2.18356e+08	1.94038e+08	1.85246e+08	2.1177e+08	1.89642e+08	0.043986	0.032781	mouse
181	428	2.1177e+08	A	0.043986	Irs1	IRS1	§325, §343	Insulin receptor substrate 1	IRS1_MOUSE|P35569	http://www.phosphosite.org/proteinAction.do?id=854&showAllSites=true	ASS*DGEGTMSRPASVDGSPVS*PSTNR	3	903.7	8	A	36.285	2.05183e+08	2.18356e+08	1.94038e+08	1.85246e+08	2.1177e+08	1.89642e+08	0.043986	0.032781	mouse
182	430	8.48399e+08	A	0.259682	Irs1	IRS1	§336	Insulin receptor substrate 1	IRS1_MOUSE|P35569	http://www.phosphosite.org/proteinAction.do?id=854&showAllSites=true	PAS*VDGSPVSPSTNR	2	775.846	2	A	27.97	7.87625e+08	9.09173e+08	5.21504e+08	7.56101e+08	8.48399e+08	6.38802e+08	0.101305	0.259682	mouse
183	432	5.63071e+07	A	0.208994	Irs1	IRS1	§336, §343	Insulin receptor substrate 1	IRS1_MOUSE|P35569	http://www.phosphosite.org/proteinAction.do?id=854&showAllSites=true	PAS*VDGSPVS*PSTNR	2	815.829	5	A	28.5425	5.04866e+07	6.21276e+07	4.13633e+07	5.57087e+07	5.63071e+07	4.8536e+07	0.146188	0.208994	mouse
184	434	8.48399e+08	A	0.259682	Irs1	IRS1	§340	Insulin receptor substrate 1	IRS1_MOUSE|P35569	http://www.phosphosite.org/proteinAction.do?id=854&showAllSites=true	PASVDGS*PVSPSTNR	2	775.846	5	A	27.97	7.87625e+08	9.09173e+08	5.21504e+08	7.56101e+08	8.48399e+08	6.38802e+08	0.101305	0.259682	mouse
185	436	5.63071e+07	A	0.208994	Irs1	IRS1	§340, §343	Insulin receptor substrate 1	IRS1_MOUSE|P35569	http://www.phosphosite.org/proteinAction.do?id=854&showAllSites=true	PASVDGS*PVS*PSTNR	2	815.829	8	A	28.5425	5.04866e+07	6.21276e+07	4.13633e+07	5.57087e+07	5.63071e+07	4.8536e+07	0.146188	0.208994	mouse
186	440	8.48399e+08	A	0.259682	Irs1	IRS1	§343	Insulin receptor substrate 1	IRS1_MOUSE|P35569	http://www.phosphosite.org/proteinAction.do?id=854&showAllSites=true	PASVDGSPVS*PSTNR	2	775.846	14	A	27.97	7.87625e+08	9.09173e+08	5.21504e+08	7.56101e+08	8.48399e+08	6.38802e+08	0.101305	0.259682	mouse
187	444	3.6831e+08	A	0.19325	Irs1	IRS1	§369	Insulin receptor substrate 1	IRS1_MOUSE|P35569	http://www.phosphosite.org/proteinAction.do?id=854&showAllSites=true	S*IPMPSSR	2	477.709	13	A	35.8975	3.03533e+08	3.56518e+08	4.18639e+08	3.17981e+08	3.30025e+08	3.6831e+08	0.113525	0.19325	mouse
188	447	5.30798e+08	A	0.103332	Irs1	IRS1	§378	Insulin receptor substrate 1	IRS1_MOUSE|P35569	http://www.phosphosite.org/proteinAction.do?id=854&showAllSites=true	CS*PSATSPVSLSSSSTSGHGSTSDCLFPR	3	1012.76	9	A	61.66	5.42897e+08	5.18699e+08	5.44085e+08	4.69989e+08	5.30798e+08	5.07037e+08	0.0322348	0.103332	mouse
189	448	3.64259e+07	A	0.269611	Irs1	IRS1	§378, §383	Insulin receptor substrate 1	IRS1_MOUSE|P35569	http://www.phosphosite.org/proteinAction.do?id=854&showAllSites=true	CS*PSATS*PVSLSSSSTSGHGSTSDCLFPR	3	1039.42	4	A	66.63	3.83586e+07	2.86298e+07	4.33702e+07	2.94815e+07	3.34942e+07	3.64259e+07	0.205387	0.269611	mouse
190	450	3.64259e+07	A	0.269611	Irs1	IRS1	§378, 382	Insulin receptor substrate 1	IRS1_MOUSE|P35569	http://www.phosphosite.org/proteinAction.do?id=854&showAllSites=true	CS*PSAT*SPVSLSSSSTSGHGSTSDCLFPR	3	1039.42	3	A	66.63	3.83586e+07	2.86298e+07	4.33702e+07	2.94815e+07	3.34942e+07	3.64259e+07	0.205387	0.269611	mouse
191	452	3.64259e+07	A	0.269611	Irs1	IRS1	§378, 386	Insulin receptor substrate 1	IRS1_MOUSE|P35569	http://www.phosphosite.org/proteinAction.do?id=854&showAllSites=true	CS*PSATSPVS*LSSSSTSGHGSTSDCLFPR	3	1039.42	4	A	66.63	3.83586e+07	2.86298e+07	4.33702e+07	2.94815e+07	3.34942e+07	3.64259e+07	0.205387	0.269611	mouse
192	453	3.64259e+07	A	0.269611	Irs1	IRS1	§378, 388	Insulin receptor substrate 1	IRS1_MOUSE|P35569	http://www.phosphosite.org/proteinAction.do?id=854&showAllSites=true	CS*PSATSPVSLS*SSSTSGHGSTSDCLFPR	3	1039.42	1	A	66.63	3.83586e+07	2.86298e+07	4.33702e+07	2.94815e+07	3.34942e+07	3.64259e+07	0.205387	0.269611	mouse
193	454	3.64259e+07	A	0.269611	Irs1	IRS1	§378, 391	Insulin receptor substrate 1	IRS1_MOUSE|P35569	http://www.phosphosite.org/proteinAction.do?id=854&showAllSites=true	CS*PSATSPVSLSSSS*TSGHGSTSDCLFPR	3	1039.42	1	A	66.63	3.83586e+07	2.86298e+07	4.33702e+07	2.94815e+07	3.34942e+07	3.64259e+07	0.205387	0.269611	mouse
194	456	5.30798e+08	A	0.103332	Irs1	IRS1	§383	Insulin receptor substrate 1	IRS1_MOUSE|P35569	http://www.phosphosite.org/proteinAction.do?id=854&showAllSites=true	CSPSATS*PVSLSSSSTSGHGSTSDCLFPR	3	1012.76	5	A	61.66	5.42897e+08	5.18699e+08	5.44085e+08	4.69989e+08	5.30798e+08	5.07037e+08	0.0322348	0.103332	mouse
195	459	6.8866e+07	A	0.190101	Irs1	IRS1	§439, §444	Insulin receptor substrate 1	IRS1_MOUSE|P35569	http://www.phosphosite.org/proteinAction.do?id=854&showAllSites=true	S*VTPDS*LGHTPPARGEEELSNYICMGGK	4	791.338	5	A	73.5133	5.10107e+07	6.01873e+07	7.81231e+07	5.9609e+07	5.5599e+07	6.8866e+07	0.116708	0.190101	mouse
196	460	5.32142e+07	A	0.255047	Irs1	IRS1	§439, §448	Insulin receptor substrate 1	IRS1_MOUSE|P35569	http://www.phosphosite.org/proteinAction.do?id=854&showAllSites=true	S*VTPDSLGHT*PPARGEEELSNYICMGGK	3	1054.78	1	A	73.87	4.11138e+07	5.92059e+07	5.65669e+07	4.98614e+07	5.01599e+07	5.32142e+07	0.255047	0.0891017	mouse
197	461	9.4584e+07	A	0.390213	Irs1	IRS1	§439, §458	Insulin receptor substrate 1	IRS1_MOUSE|P35569	http://www.phosphosite.org/proteinAction.do?id=854&showAllSites=true	S*VTPDSLGHTPPARGEEELS*NYICM#GGK	4	795.337	1	A	48.135	1.20682e+08	6.84861e+07	1.04764e+08	6.44912e+07	9.4584e+07	8.46277e+07	0.390213	0.336501	mouse
198	462	4.66739e+07	A	0.560349	Irs1	IRS1	§439, §460	Insulin receptor substrate 1	IRS1_MOUSE|P35569	http://www.phosphosite.org/proteinAction.do?id=854&showAllSites=true	S*VTPDSLGHTPPARGEEELSNY*ICM#GGK	3	1060.11	1	A	70.17	6.51674e+07	2.81805e+07	4.8276e+07	2.44236e+07	4.66739e+07	3.63498e+07	0.560349	0.463996	mouse
199	466	1.76845e+08	A	0.0892823	Irs1	IRS1	§441	Insulin receptor substrate 1	IRS1_MOUSE|P35569	http://www.phosphosite.org/proteinAction.do?id=854&showAllSites=true	SVT*PDSLGHTPPAR	3	505.572	16	A	34.47	1.65681e+08	1.8801e+08	1.31634e+08	1.34849e+08	1.76845e+08	1.33241e+08	0.0892823	0.0170616	mouse
200	469	9.4584e+07	A	0.390213	Irs1	IRS1	§441, §444	Insulin receptor substrate 1	IRS1_MOUSE|P35569	http://www.phosphosite.org/proteinAction.do?id=854&showAllSites=true	SVT*PDS*LGHTPPARGEEELSNYICM#GGK	4	795.337	4	A	48.135	1.20682e+08	6.84861e+07	1.04764e+08	6.44912e+07	9.4584e+07	8.46277e+07	0.390213	0.336501	mouse
201	475	9.4584e+07	A	0.390213	Irs1	IRS1	§441, §448	Insulin receptor substrate 1	IRS1_MOUSE|P35569	http://www.phosphosite.org/proteinAction.do?id=854&showAllSites=true	SVT*PDSLGHT*PPARGEEELSNYICM#GGK	4	795.337	19	A	48.135	1.20682e+08	6.84861e+07	1.04764e+08	6.44912e+07	9.4584e+07	8.46277e+07	0.390213	0.336501	mouse
202	480	8.23926e+07	A	0.36473	Irs1	IRS1	§444	Insulin receptor substrate 1	IRS1_MOUSE|P35569	http://www.phosphosite.org/proteinAction.do?id=854&showAllSites=true	SVTPDS*LGHTPPARGEEELSNYICMGGK	4	771.347	7	A	59.4967	6.11433e+07	1.03642e+08	7.97079e+07	7.36638e+07	8.23926e+07	7.66859e+07	0.36473	0.055732	mouse
203	485	8.23926e+07	A	0.36473	Irs1	IRS1	§448	Insulin receptor substrate 1	IRS1_MOUSE|P35569	http://www.phosphosite.org/proteinAction.do?id=854&showAllSites=true	SVTPDSLGHT*PPARGEEELSNYICMGGK	4	771.347	9	A	59.4967	6.11433e+07	1.03642e+08	7.97079e+07	7.36638e+07	8.23926e+07	7.66859e+07	0.36473	0.055732	mouse
204	486	4.62037e+07	A	0.151826	Irs1	IRS1	298, §300	Insulin receptor substrate 1	IRS1_MOUSE|P35569	http://www.phosphosite.org/proteinAction.do?id=854&showAllSites=true	S*RT*ESITATSPASM#VGGKPGSFR	3	834.036	2	A	42.24	5.03045e+07	4.21029e+07	4.20534e+07	3.38993e+07	4.62037e+07	3.79764e+07	0.125519	0.151826	mouse
205	487	1.80759e+08	A	0.123754	Irs1	IRS1	298, §306	Insulin receptor substrate 1	IRS1_MOUSE|P35569	http://www.phosphosite.org/proteinAction.do?id=854&showAllSites=true	S*RTESITAT*SPASMVGGKPGSFR	3	828.705	1	A	53.395	1.64942e+08	1.96577e+08	1.51977e+08	1.37289e+08	1.80759e+08	1.44633e+08	0.123754	0.0718053	mouse
206	494	1561880832	A	0.248911	Irs1	IRS1	304	Insulin receptor substrate 1	IRS1_MOUSE|P35569	http://www.phosphosite.org/proteinAction.do?id=854&showAllSites=true	TESIT*ATSPASMVGGK	2	808.865	10	A	45.74	990990464	1414344704	1744781568	1378980096	1202667584	1561880832	0.248911	0.165608	mouse
207	495	1.80759e+08	A	0.123754	Irs1	IRS1	304, §306	Insulin receptor substrate 1	IRS1_MOUSE|P35569	http://www.phosphosite.org/proteinAction.do?id=854&showAllSites=true	SRTESIT*AT*SPASMVGGKPGSFR	3	828.705	2	A	53.395	1.64942e+08	1.96577e+08	1.51977e+08	1.37289e+08	1.80759e+08	1.44633e+08	0.123754	0.0718053	mouse
208	497	4.62037e+07	A	0.151826	Irs1	IRS1	304, §307	Insulin receptor substrate 1	IRS1_MOUSE|P35569	http://www.phosphosite.org/proteinAction.do?id=854&showAllSites=true	SRTESIT*ATS*PASM#VGGKPGSFR	3	834.036	5	A	42.24	5.03045e+07	4.21029e+07	4.20534e+07	3.38993e+07	4.62037e+07	3.79764e+07	0.125519	0.151826	mouse
209	499	1.00038e+08	A	0.153778	Irs1	IRS1	304, §318	Insulin receptor substrate 1	IRS1_MOUSE|P35569	http://www.phosphosite.org/proteinAction.do?id=854&showAllSites=true	TESIT*ATSPASMVGGKPGS*FR	3	747.66	1	A	57.2267	7.46966e+07	9.29232e+07	1.07329e+08	9.2746e+07	8.38099e+07	1.00038e+08	0.153778	0.10308	mouse
210	500	7.09433e+06	A	0.192949	Irs1	IRS1	330, §332	Insulin receptor substrate 1	IRS1_MOUSE|P35569	http://www.phosphosite.org/proteinAction.do?id=854&showAllSites=true	ASSDGEGT*M#S*RPASVDGSPVSPSTNR	3	909.032	2	A	35.16	6.20606e+06	7.9826e+06	5.52707e+06	4.19996e+06	7.09433e+06	4.86352e+06	0.177072	0.192949	mouse
211	501	5.30798e+08	A	0.103332	Irs1	IRS1	380	Insulin receptor substrate 1	IRS1_MOUSE|P35569	http://www.phosphosite.org/proteinAction.do?id=854&showAllSites=true	CSPS*ATSPVSLSSSSTSGHGSTSDCLFPR	3	1012.76	3	A	61.66	5.42897e+08	5.18699e+08	5.44085e+08	4.69989e+08	5.30798e+08	5.07037e+08	0.0322348	0.103332	mouse
212	502	3.64259e+07	A	0.269611	Irs1	IRS1	380, 382	Insulin receptor substrate 1	IRS1_MOUSE|P35569	http://www.phosphosite.org/proteinAction.do?id=854&showAllSites=true	CSPS*AT*SPVSLSSSSTSGHGSTSDCLFPR	3	1039.42	2	A	66.63	3.83586e+07	2.86298e+07	4.33702e+07	2.94815e+07	3.34942e+07	3.64259e+07	0.205387	0.269611	mouse
213	503	3.64259e+07	A	0.269611	Irs1	IRS1	380, 388	Insulin receptor substrate 1	IRS1_MOUSE|P35569	http://www.phosphosite.org/proteinAction.do?id=854&showAllSites=true	CSPS*ATSPVSLS*SSSTSGHGSTSDCLFPR	3	1039.42	1	A	66.63	3.83586e+07	2.86298e+07	4.33702e+07	2.94815e+07	3.34942e+07	3.64259e+07	0.205387	0.269611	mouse
214	506	5.30798e+08	A	0.103332	Irs1	IRS1	382	Insulin receptor substrate 1	IRS1_MOUSE|P35569	http://www.phosphosite.org/proteinAction.do?id=854&showAllSites=true	CSPSAT*SPVSLSSSSTSGHGSTSDCLFPR	3	1012.76	5	A	61.66	5.42897e+08	5.18699e+08	5.44085e+08	4.69989e+08	5.30798e+08	5.07037e+08	0.0322348	0.103332	mouse
215	507	8.96941e+06	A	0.289586	Irs2	IRS2	§1137	Insulin receptor substrate 2	IRS2_MOUSE|P81122	http://www.phosphosite.org/proteinAction.do?id=6132&showAllSites=true	RHS*SETFSSTTTVTPVSPSFAHNSK	4	693.821	1	A	42.87	8.34094e+06	8.75311e+06	1.08061e+07	7.13276e+06	8.54702e+06	8.96941e+06	0.0341001	0.289586	mouse
216	508	4.20099e+07	A	0.0787858	Irs2	IRS2	§1138, §1151	Insulin receptor substrate 2	IRS2_MOUSE|P81122	http://www.phosphosite.org/proteinAction.do?id=6132&showAllSites=true	HSS*ETFSSTTTVTPVS*PSFAHNSK	3	899.381	2	A	52.07	4.30724e+07	4.09474e+07	3.45462e+07	3.09002e+07	4.20099e+07	3.27232e+07	0.0357683	0.0787858	mouse
217	510	8.96941e+06	A	0.289586	Irs2	IRS2	§1140	Insulin receptor substrate 2	IRS2_MOUSE|P81122	http://www.phosphosite.org/proteinAction.do?id=6132&showAllSites=true	RHSSET*FSSTTTVTPVSPSFAHNSK	4	693.821	4	A	42.87	8.34094e+06	8.75311e+06	1.08061e+07	7.13276e+06	8.54702e+06	8.96941e+06	0.0341001	0.289586	mouse
218	511	4.20099e+07	A	0.0787858	Irs2	IRS2	§1140, §1151	Insulin receptor substrate 2	IRS2_MOUSE|P81122	http://www.phosphosite.org/proteinAction.do?id=6132&showAllSites=true	HSSET*FSSTTTVTPVS*PSFAHNSK	3	899.381	3	A	52.07	4.30724e+07	4.09474e+07	3.45462e+07	3.09002e+07	4.20099e+07	3.27232e+07	0.0357683	0.0787858	mouse
219	512	9.84839e+06	A	0.106685	Irs2	IRS2	§360, §381	Insulin receptor substrate 2	IRS2_MOUSE|P81122	http://www.phosphosite.org/proteinAction.do?id=6132&showAllSites=true	T*ASEGDGGAAGGAGTAGGRPMS*VAGSPLSPGPVR	3	1038.12	1	A	58.215	9.10545e+06	1.05913e+07	7.92819e+06	8.39611e+06	9.84839e+06	8.16215e+06	0.106685	0.040537	mouse
220	513	9.84839e+06	A	0.106685	Irs2	IRS2	§360, §388	Insulin receptor substrate 2	IRS2_MOUSE|P81122	http://www.phosphosite.org/proteinAction.do?id=6132&showAllSites=true	T*ASEGDGGAAGGAGTAGGRPMSVAGSPLS*PGPVR	3	1038.12	2	A	58.215	9.10545e+06	1.05913e+07	7.92819e+06	8.39611e+06	9.84839e+06	8.16215e+06	0.106685	0.040537	mouse
221	514	1.81744e+07	A	0.0867554	Irs2	IRS2	§362	Insulin receptor substrate 2	IRS2_MOUSE|P81122	http://www.phosphosite.org/proteinAction.do?id=6132&showAllSites=true	TAS*EGDGGAAGGAGTAGGR	2	800.323	4	A	16.7375	1.77943e+07	1.85545e+07	1.45524e+07	1.64545e+07	1.81744e+07	1.55034e+07	0.0295782	0.0867554	mouse
222	515	9.84839e+06	A	0.106685	Irs2	IRS2	§362, §388	Insulin receptor substrate 2	IRS2_MOUSE|P81122	http://www.phosphosite.org/proteinAction.do?id=6132&showAllSites=true	TAS*EGDGGAAGGAGTAGGRPMSVAGSPLS*PGPVR	3	1038.12	1	A	58.215	9.10545e+06	1.05913e+07	7.92819e+06	8.39611e+06	9.84839e+06	8.16215e+06	0.106685	0.040537	mouse
223	518	1.061e+07	A	0.397444	Irs2	IRS2	§388	Insulin receptor substrate 2	IRS2_MOUSE|P81122	http://www.phosphosite.org/proteinAction.do?id=6132&showAllSites=true	SVAGSPLS*PGPVR	2	652.324	3	A	49.995	7.62823e+06	1.35918e+07	6.82381e+06	9.27248e+06	1.061e+07	8.04815e+06	0.397444	0.215139	mouse
224	519	9.17364e+06	A	0.0629582	Irs2	IRS2	§401	Insulin receptor substrate 2	IRS2_MOUSE|P81122	http://www.phosphosite.org/proteinAction.do?id=6132&showAllSites=true	SHT*LSAGCGGR	2	591.74	2	A	16.335	8.76524e+06	9.58203e+06	4.96771e+06	4.68392e+06	9.17364e+06	4.82582e+06	0.0629582	0.0415828	mouse
225	520	1.30186e+07	A	0.0288327	Irs2	IRS2	§556	Insulin receptor substrate 2	IRS2_MOUSE|P81122	http://www.phosphosite.org/proteinAction.do?id=6132&showAllSites=true	RVS*GDGAQDLDR	2	684.799	2	A	22.2	1.27532e+07	1.3284e+07	9.409e+06	9.50717e+06	1.30186e+07	9.45808e+06	0.0288327	0.00733965	mouse
226	521	1.21357e+07	A	0.228935	Itsn1;Itsn1	ITSN1;ITSN1 iso 2	§313; §313	Intersectin-1	ITSN1_MOUSE|Q9Z0R4;ITSN1_MOUSE|Q9Z0R4-2	http://www.phosphosite.org/proteinAction.do?id=6575&showAllSites=true	S*GSGM#SVISSSSVDQR	2	840.351	2	A	36.96	8.91172e+06	1.07608e+07	1.01711e+07	1.41002e+07	9.83627e+06	1.21357e+07	0.132927	0.228935	mouse
227	522	1.21357e+07	A	0.228935	Itsn1;Itsn1	ITSN1;ITSN1 iso 2	§315; §315	Intersectin-1	ITSN1_MOUSE|Q9Z0R4;ITSN1_MOUSE|Q9Z0R4-2	http://www.phosphosite.org/proteinAction.do?id=6575&showAllSites=true	SGS*GM#SVISSSSVDQR	2	840.351	1	A	36.96	8.91172e+06	1.07608e+07	1.01711e+07	1.41002e+07	9.83627e+06	1.21357e+07	0.132927	0.228935	mouse
228	523	1.21357e+07	A	0.228935	Itsn1;Itsn1	ITSN1;ITSN1 iso 2	§318; §318	Intersectin-1	ITSN1_MOUSE|Q9Z0R4;ITSN1_MOUSE|Q9Z0R4-2	http://www.phosphosite.org/proteinAction.do?id=6575&showAllSites=true	SGSGM#S*VISSSSVDQR	2	840.351	1	A	36.96	8.91172e+06	1.07608e+07	1.01711e+07	1.41002e+07	9.83627e+06	1.21357e+07	0.132927	0.228935	mouse
229	527	1.41276e+07	A	0.0474959	Itsn1;Itsn1	ITSN1;ITSN1 iso 2	§476; §476	Intersectin-1	ITSN1_MOUSE|Q9Z0R4;ITSN1_MOUSE|Q9Z0R4-2	http://www.phosphosite.org/proteinAction.do?id=6575&showAllSites=true	RKT*LEFELEALNDKK	4	479.249	11	A	59.3175	1.12655e+07	1.19277e+07	1.36532e+07	1.46021e+07	1.15966e+07	1.41276e+07	0.040376	0.0474959	mouse
230	532	3.46808e+08	A	0.126296	Maged1	NRAGE	§166	Melanoma-associated antigen D1	MAGD1_MOUSE|Q9QYH6	http://www.phosphosite.org/proteinAction.do?id=2804&showAllSites=true	AGPGTTYNFPQS*PSANEMTNNQPK	3	877.711	20	A	52.33	2.98829e+08	3.57437e+08	3.54223e+08	3.39392e+08	3.28133e+08	3.46808e+08	0.126296	0.0302391	mouse
231	533	6.36834e+08	A	0.214844	Mapkap1;Mapkap1;Mapkap1	Sin1;Sin1 iso 2;Sin1 iso 3	§510; 474; 318	Target of rapamycin complex 2 subunit MAPKAP1	SIN1_MOUSE|Q8BKH7;SIN1_MOUSE|Q8BKH7-2;SIN1_MOUSE|Q8BKH7-3	http://www.phosphosite.org/proteinAction.do?id=24662&showAllSites=true	RTS*FSFQK	2	540.747	2	A	37.28	5.22477e+08	7.0966e+08	6.91314e+08	5.82354e+08	6.16069e+08	6.36834e+08	0.214844	0.120983	mouse
232	536	6.36834e+08	A	0.214844	Mapkap1;Mapkap1;Mapkap1	Sin1;Sin1 iso 2;Sin1 iso 3	§512; 476; 320	Target of rapamycin complex 2 subunit MAPKAP1	SIN1_MOUSE|Q8BKH7;SIN1_MOUSE|Q8BKH7-2;SIN1_MOUSE|Q8BKH7-3	http://www.phosphosite.org/proteinAction.do?id=24662&showAllSites=true	RTSFS*FQK	2	540.747	4	A	37.28	5.22477e+08	7.0966e+08	6.91314e+08	5.82354e+08	6.16069e+08	6.36834e+08	0.214844	0.120983	mouse
233	538	1.25104e+08	A	0.0586878	Mical1;Mical1;Mical1	MICAL1;MICAL1 iso 2;MICAL1 iso 3	§777, §781; 704, 708; §777, §781	Protein-methionine sulfoxide oxidase MICAL1	MICA1_MOUSE|Q8VDP3;MICA1_MOUSE|Q8VDP3-2;MICA1_MOUSE|Q8VDP3-3	http://www.phosphosite.org/proteinAction.do?id=12039&showAllSites=true	VS*PVPS*PSQPAR	2	691.299	8	A	33.4675	9.97081e+07	1.08342e+08	1.22557e+08	1.27652e+08	1.04025e+08	1.25104e+08	0.0586878	0.0288021	mouse
234	541	9.31034e+08	A	0.247074	Mical1;Mical1;Mical1	MICAL1;MICAL1 iso 2;MICAL1 iso 3	§777; 704; §777	Protein-methionine sulfoxide oxidase MICAL1	MICA1_MOUSE|Q8VDP3;MICA1_MOUSE|Q8VDP3-2;MICA1_MOUSE|Q8VDP3-3	http://www.phosphosite.org/proteinAction.do?id=12039&showAllSites=true	VS*PVPSPSQPAR	2	651.316	9	A	33.695	5.76035e+08	8.19918e+08	9.07627e+08	9.5444e+08	6.97976e+08	9.31034e+08	0.247074	0.035554	mouse
235	542	9.31034e+08	A	0.247074	Mical1;Mical1;Mical1	MICAL1;MICAL1 iso 2;MICAL1 iso 3	§781; 708; §781	Protein-methionine sulfoxide oxidase MICAL1	MICA1_MOUSE|Q8VDP3;MICA1_MOUSE|Q8VDP3-2;MICA1_MOUSE|Q8VDP3-3	http://www.phosphosite.org/proteinAction.do?id=12039&showAllSites=true	VSPVPS*PSQPAR	2	651.316	2	A	33.695	5.76035e+08	8.19918e+08	9.07627e+08	9.5444e+08	6.97976e+08	9.31034e+08	0.247074	0.035554	mouse
236	544	1.0368e+07	A	0.590021	Mical1;Mical1;Mical1	MICAL1;MICAL1 iso 2;MICAL1 iso 3	§793; 720; §793	Protein-methionine sulfoxide oxidase MICAL1	MICA1_MOUSE|Q8VDP3;MICA1_MOUSE|Q8VDP3-2;MICA1_MOUSE|Q8VDP3-3	http://www.phosphosite.org/proteinAction.do?id=12039&showAllSites=true	LIRLS*SLERLRLSSLNIIPDSGAEPPPKPPR	5	701.192	3	A	85.645	1.33973e+07	7.33877e+06	6.1495e+06	2.52883e+06	1.0368e+07	4.33917e+06	0.413197	0.590021	mouse
237	545	1.0368e+07	A	0.590021	Mical1;Mical1;Mical1	MICAL1;MICAL1 iso 2;MICAL1 iso 3	§794; 721; §794	Protein-methionine sulfoxide oxidase MICAL1	MICA1_MOUSE|Q8VDP3;MICA1_MOUSE|Q8VDP3-2;MICA1_MOUSE|Q8VDP3-3	http://www.phosphosite.org/proteinAction.do?id=12039&showAllSites=true	LIRLSS*LERLRLSSLNIIPDSGAEPPPKPPR	5	701.192	2	A	85.645	1.33973e+07	7.33877e+06	6.1495e+06	2.52883e+06	1.0368e+07	4.33917e+06	0.413197	0.590021	mouse
238	549	1.75178e+08	A	0.278649	Mical1;Mical1;Mical1	MICAL1;MICAL1 iso 2;MICAL1 iso 3	774; 701; 774	Protein-methionine sulfoxide oxidase MICAL1	MICA1_MOUSE|Q8VDP3;MICA1_MOUSE|Q8VDP3-2;MICA1_MOUSE|Q8VDP3-3	http://www.phosphosite.org/proteinAction.do?id=12039&showAllSites=true	EADNNGSLESQELPTPGDSNMQPDPSSPPVT*RVSPVPSPSQPAR	4	1163.03	13	A	60.655	9.50108e+07	1.41639e+08	1.69337e+08	1.8102e+08	1.18325e+08	1.75178e+08	0.278649	0.0471585	mouse
239	550	1.44982e+08	A	0.199027	Mical2;Mical2;Mical2	MICAL2;MICAL2 iso2 iso 2;MICAL2 iso2 iso 3	§515; 515; 515	Protein-methionine sulfoxide oxidase MICAL2	MICA2_MOUSE|Q8BML1;MICA2_MOUSE|Q8BML1-2;MICA2_MOUSE|Q8BML1-3	http://www.phosphosite.org/proteinAction.do?id=8728&showAllSites=true	RES*DIRPNK	2	597.785	8	A	13.585	1.46953e+08	1.39382e+08	1.24578e+08	1.65386e+08	1.43168e+08	1.44982e+08	0.0373886	0.199027	mouse
240	553	6.51759e+06	A	0.267446	Mpdz	MPDZ	1238	Multiple PDZ domain protein	MPDZ_MOUSE|Q8VBX6-2	http://www.phosphosite.org/proteinAction.do?id=10659&showAllSites=true	APS*QSESETEK	2	636.753	5	A	13.79	6.94041e+06	6.09477e+06	2.88189e+06	4.2261e+06	6.51759e+06	3.554e+06	0.0917446	0.267446	mouse
241	556	2.22994e+08	A	0.202126	Mpdz;Mpdz;Mpdz;Mpdz	MPDZ iso 2;MPDZ;MPDZ iso 3;MPDZ iso 4	1770; §1803; §1803; §1805	Multiple PDZ domain protein	MPDZ_MOUSE|Q8VBX6-2;MPDZ_MOUSE|Q8VBX6;MPDZ_MOUSE|Q8VBX6-3;MPDZ_MOUSE|Q8VBX6-4	http://www.phosphosite.org/proteinAction.do?id=10659&showAllSites=true	RPS*QSSQVSESSLSSFTPPLSGINTSESLESNSK	3	1212.23	8	A	75.23	2.41782e+08	2.04206e+08	2.1017e+08	1.57605e+08	2.22994e+08	1.83888e+08	0.119152	0.202126	mouse
242	559	2.22994e+08	A	0.202126	Mpdz;Mpdz;Mpdz;Mpdz	MPDZ iso 2;MPDZ;MPDZ iso 3;MPDZ iso 4	1772; §1805; §1805; 1807	Multiple PDZ domain protein	MPDZ_MOUSE|Q8VBX6-2;MPDZ_MOUSE|Q8VBX6;MPDZ_MOUSE|Q8VBX6-3;MPDZ_MOUSE|Q8VBX6-4	http://www.phosphosite.org/proteinAction.do?id=10659&showAllSites=true	RPSQS*SQVSESSLSSFTPPLSGINTSESLESNSK	3	1212.23	5	A	75.23	2.41782e+08	2.04206e+08	2.1017e+08	1.57605e+08	2.22994e+08	1.83888e+08	0.119152	0.202126	mouse
243	562	2.22994e+08	A	0.202126	Mpdz;Mpdz;Mpdz;Mpdz	MPDZ iso 2;MPDZ;MPDZ iso 3;MPDZ iso 4	1773; §1806; §1806; 1808	Multiple PDZ domain protein	MPDZ_MOUSE|Q8VBX6-2;MPDZ_MOUSE|Q8VBX6;MPDZ_MOUSE|Q8VBX6-3;MPDZ_MOUSE|Q8VBX6-4	http://www.phosphosite.org/proteinAction.do?id=10659&showAllSites=true	RPSQSS*QVSESSLSSFTPPLSGINTSESLESNSK	3	1212.23	5	A	75.23	2.41782e+08	2.04206e+08	2.1017e+08	1.57605e+08	2.22994e+08	1.83888e+08	0.119152	0.202126	mouse
244	565	6.38851e+07	A	0.0733372	Mpdz;Mpdz;Mpdz;Mpdz	MPDZ iso 2;MPDZ;MPDZ iso 3;MPDZ iso 4	230; 230; 230; 230	Multiple PDZ domain protein	MPDZ_MOUSE|Q8VBX6-2;MPDZ_MOUSE|Q8VBX6;MPDZ_MOUSE|Q8VBX6-3;MPDZ_MOUSE|Q8VBX6-4	http://www.phosphosite.org/proteinAction.do?id=10659&showAllSites=true	GSLPPVS*SPR	2	538.76	2	A	33.83	5.41416e+07	6.0064e+07	6.38404e+07	6.39298e+07	5.71028e+07	6.38851e+07	0.0733372	0.00098916	mouse
245	566	4586187	A	0.352582	Mrvi1;Mrvi1	MRVI1;MRVI1 iso 2	§382; 339	Protein MRVI1	MRVI1_MOUSE|Q9WUX5;MRVI1_MOUSE|Q9WUX5-2	http://www.phosphosite.org/proteinAction.do?id=11447&showAllSites=true	GVS*WDSSPEEPGPLLQK	2	953.435	1	A	72.07	381896	386549	5729583	3442791	384222	4586187	0.00856318	0.352582	mouse
246	568	3.4359e+07	A	0.203259	Mrvi1;Mrvi1	MRVI1;MRVI1 iso 2	§683; 640	Protein MRVI1	MRVI1_MOUSE|Q9WUX5;MRVI1_MOUSE|Q9WUX5-2	http://www.phosphosite.org/proteinAction.do?id=11447&showAllSites=true	RVS*VAVVPK	2	517.792	6	A	32.6975	1.39986e+07	1.86979e+07	3.15378e+07	3.71801e+07	1.63482e+07	3.4359e+07	0.203259	0.11612	mouse
247	571	1.26246e+08	A	0.294694	Mtss1;Mtss1	MTSS1;MTSS1 iso4 iso 2	§276; 276	Metastasis suppressor protein 1	MTSS1_MOUSE|Q8R1S4;MTSS1_MOUSE|Q8R1S4-2	http://www.phosphosite.org/proteinAction.do?id=13507&showAllSites=true	KSS*VCSSLNSVNSSDSR	3	631.938	8	A	30.7675	8.50663e+07	7.33759e+07	1.52553e+08	9.9939e+07	7.92211e+07	1.26246e+08	0.104345	0.294694	mouse
248	573	56563140	A	0.14215	Mtss1;Mtss1	MTSS1;MTSS1 iso4 iso 2	§298; 298	Metastasis suppressor protein 1	MTSS1_MOUSE|Q8R1S4;MTSS1_MOUSE|Q8R1S4-2	http://www.phosphosite.org/proteinAction.do?id=13507&showAllSites=true	SSGSHSHS*PSSHYR	3	531.546	10	A	11.925	49936516	58850820	62248600	50877680	54393668	56563140	0.115884	0.14215	mouse
249	576	8.65384e+07	A	0.471203	Mtss1;Mtss1	MTSS1;MTSS1 iso4 iso 2	§573; 573	Metastasis suppressor protein 1	MTSS1_MOUSE|Q8R1S4;MTSS1_MOUSE|Q8R1S4-2	http://www.phosphosite.org/proteinAction.do?id=13507&showAllSites=true	RPAS*TAGLPTTLGPAM#VTPGVATIR	3	844.44	7	A	72.46	1.15372e+08	5.77046e+07	8.81232e+07	6.41862e+07	8.65384e+07	7.61547e+07	0.471203	0.222258	mouse
250	581	1.19986e+08	A	0.200104	Mtss1;Mtss1	MTSS1;MTSS1 iso4 iso 2	§574; 574	Metastasis suppressor protein 1	MTSS1_MOUSE|Q8R1S4;MTSS1_MOUSE|Q8R1S4-2	http://www.phosphosite.org/proteinAction.do?id=13507&showAllSites=true	RPAST*AGLPTTLGPAMVTPGVATIR	3	839.108	8	A	78.26	8.71597e+07	1.1589e+08	1.27277e+08	1.12695e+08	1.01525e+08	1.19986e+08	0.200104	0.0859353	mouse
251	582	1.19986e+08	A	0.200104	Mtss1;Mtss1	MTSS1;MTSS1 iso4 iso 2	§579; 579	Metastasis suppressor protein 1	MTSS1_MOUSE|Q8R1S4;MTSS1_MOUSE|Q8R1S4-2	http://www.phosphosite.org/proteinAction.do?id=13507&showAllSites=true	RPASTAGLPT*TLGPAMVTPGVATIR	3	839.108	1	A	78.26	8.71597e+07	1.1589e+08	1.27277e+08	1.12695e+08	1.01525e+08	1.19986e+08	0.200104	0.0859353	mouse
252	584	4.29806e+07	A	0.238258	Mtss1;Mtss1	MTSS1;MTSS1 iso4 iso 2	§598; 598	Metastasis suppressor protein 1	MTSS1_MOUSE|Q8R1S4;MTSS1_MOUSE|Q8R1S4-2	http://www.phosphosite.org/proteinAction.do?id=13507&showAllSites=true	TPS*TKPSVR	2	526.76	5	A	14.14	3.22771e+07	4.53563e+07	4.41782e+07	4.17831e+07	3.88167e+07	4.29806e+07	0.238258	0.0394038	mouse
253	585	2.51721e+08	A	0.0932603	Mtss1;Mtss1	MTSS1;MTSS1 iso4 iso 2	§599; 599	Metastasis suppressor protein 1	MTSS1_MOUSE|Q8R1S4;MTSS1_MOUSE|Q8R1S4-2	http://www.phosphosite.org/proteinAction.do?id=13507&showAllSites=true	RTPST*KPSVR	3	403.543	2	A	13.845	1.86337e+08	1.9664e+08	2.6832e+08	2.35121e+08	1.91489e+08	2.51721e+08	0.0380448	0.0932603	mouse
254	586	2.14217e+07	A	0.171433	Mtss1;Mtss1	MTSS1;MTSS1 iso4 iso 2	§607; 607	Metastasis suppressor protein 1	MTSS1_MOUSE|Q8R1S4;MTSS1_MOUSE|Q8R1S4-2	http://www.phosphosite.org/proteinAction.do?id=13507&showAllSites=true	RGT*IGAGPIPIK	2	630.347	3	A	48.5767	1.8825e+07	2.40185e+07	1.49234e+07	1.65558e+07	2.14217e+07	1.57396e+07	0.171433	0.0733355	mouse
255	587	1.51976e+07	A	0.399509	Mvb12a	FAM125A	§198	Multivesicular body subunit 12A	MB12A_MOUSE|Q78HU3	http://www.phosphosite.org/proteinAction.do?id=16535&showAllSites=true	RT*DSIYEASSLYGISAMDGVPFTLHPR	3	1021.81	1	A	89.2	1.55992e+07	1.4796e+07	1.44079e+07	8.06063e+06	1.51976e+07	1.12343e+07	0.037375	0.399509	mouse
256	589	1.51976e+07	A	0.399509	Mvb12a	FAM125A	§200	Multivesicular body subunit 12A	MB12A_MOUSE|Q78HU3	http://www.phosphosite.org/proteinAction.do?id=16535&showAllSites=true	RTDS*IYEASSLYGISAMDGVPFTLHPR	3	1021.81	2	A	89.2	1.55992e+07	1.4796e+07	1.44079e+07	8.06063e+06	1.51976e+07	1.12343e+07	0.037375	0.399509	mouse
257	591	1.51976e+07	A	0.399509	Mvb12a	FAM125A	§202	Multivesicular body subunit 12A	MB12A_MOUSE|Q78HU3	http://www.phosphosite.org/proteinAction.do?id=16535&showAllSites=true	RTDSIY*EASSLYGISAMDGVPFTLHPR	3	1021.81	3	A	89.2	1.55992e+07	1.4796e+07	1.44079e+07	8.06063e+06	1.51976e+07	1.12343e+07	0.037375	0.399509	mouse
258	596	5.22066e+07	A	0.337381	Nbeal2;Nbeal2	NBEAL2;NBEAL2 iso 2	§2727; 2728	Neurobeachin-like protein 2	NBEL2_MOUSE|Q6ZQA0;NBEL2_MOUSE|Q6ZQA0-2	http://www.phosphosite.org/proteinAction.do?id=15666&showAllSites=true	RIS*QVSSGETEYNPGEAR	3	687.308	8	A	38.1575	5.24124e+07	5.20008e+07	5.2051e+07	3.19995e+07	5.22066e+07	4.20253e+07	0.0055751	0.337381	mouse
259	597	3.24714e+06	A	0.321168	Nck1	NCK1	§348	Cytoplasmic protein NCK1	NCK1_MOUSE|Q99M51	http://www.phosphosite.org/proteinAction.do?id=2726&showAllSites=true	KFST*MEELVEHYK	3	574.26	4	A	75.12	2.47545e+06	3.93016e+06	3.80557e+06	2.6887e+06	3.2028e+06	3.24714e+06	0.321168	0.243215	mouse
260	598	2.37497e+07	A	0.114027	Pacs1	PACS-1	§317	Phosphofurin acidic cluster sorting protein 1	PACS1_MOUSE|Q8K212	http://www.phosphosite.org/proteinAction.do?id=11116&showAllSites=true	KLT*STSAITR	2	579.3	1	A	23.81	1.31059e+07	1.54047e+07	2.23461e+07	2.51533e+07	1.42553e+07	2.37497e+07	0.114027	0.0835805	mouse
261	604	1.53709e+08	A	0.142256	Pag1	PAG	§379	Phosphoprotein associated with glycosphingolipid-enriched microdomains 1	PHAG1_MOUSE|Q3U1F9	http://www.phosphosite.org/proteinAction.do?id=2806&showAllSites=true	RPS*EEPEPDYEAIQTLNREDEK	3	909.071	18	A	57.93	1.51599e+08	1.55819e+08	1.11063e+08	9.07616e+07	1.53709e+08	1.00912e+08	0.0194118	0.142256	mouse
262	610	8.27303e+07	A	0.0971842	Pard3	PAR3-alpha	§1312	Partitioning defective 3 homolog	PARD3_MOUSE|Q99NH2	http://www.phosphosite.org/proteinAction.do?id=2771&showAllSites=true	QDVPPS*PSQVAR	2	680.817	14	A	37.0225	6.62402e+07	7.6016e+07	8.54009e+07	8.00597e+07	7.11281e+07	8.27303e+07	0.0971842	0.0456521	mouse
263	614	2.36709e+08	A	0.18433	Pard3b	PAR3-beta	§141	Partitioning defective 3 homolog B	PAR3L_MOUSE|Q9CSB4	http://www.phosphosite.org/proteinAction.do?id=7517&showAllSites=true	RSS*DPAPGPHADAQPSTASLSGQSLKPVVLDSTQNVENK	5	813.996	11	A	56.085	1.83863e+08	1.4146e+08	2.5742e+08	2.15998e+08	1.62661e+08	2.36709e+08	0.18433	0.123737	mouse
264	615	2.36709e+08	A	0.18433	Pard3b	PAR3-beta	140	Partitioning defective 3 homolog B	PAR3L_MOUSE|Q9CSB4	http://www.phosphosite.org/proteinAction.do?id=7517&showAllSites=true	RS*SDPAPGPHADAQPSTASLSGQSLKPVVLDSTQNVENK	5	813.996	2	A	56.085	1.83863e+08	1.4146e+08	2.5742e+08	2.15998e+08	1.62661e+08	2.36709e+08	0.18433	0.123737	mouse
265	620	2.49576e+08	A	0.0857823	Pard3b;Pard3b	PAR3-beta;PAR3-beta iso 2	§133; §133	Partitioning defective 3 homolog B	PAR3L_MOUSE|Q9CSB4;PAR3L_MOUSE|Q9CSB4-2	http://www.phosphosite.org/proteinAction.do?id=7517&showAllSites=true	LGT*PLLVR	2	474.767	17	A	65.045	2.20253e+08	2.42911e+08	2.64714e+08	2.34437e+08	2.31582e+08	2.49576e+08	0.069184	0.0857823	mouse
266	621	1.30251e+07	A	0.182079	Pard3b;Pard3b	PAR3-beta;PAR3-beta iso 2	§363; §363	Partitioning defective 3 homolog B	PAR3L_MOUSE|Q9CSB4;PAR3L_MOUSE|Q9CSB4-2	http://www.phosphosite.org/proteinAction.do?id=7517&showAllSites=true	KPS*SPSLSPLMGFGSK	3	567.276	1	A	70.68	8.12786e+06	9.4779e+06	1.4702e+07	1.13481e+07	8.80288e+06	1.30251e+07	0.108444	0.182079	mouse
267	622	1.30251e+07	A	0.182079	Pard3b;Pard3b	PAR3-beta;PAR3-beta iso 2	§364; §364	Partitioning defective 3 homolog B	PAR3L_MOUSE|Q9CSB4;PAR3L_MOUSE|Q9CSB4-2	http://www.phosphosite.org/proteinAction.do?id=7517&showAllSites=true	KPSS*PSLSPLMGFGSK	3	567.276	2	A	70.68	8.12786e+06	9.4779e+06	1.4702e+07	1.13481e+07	8.80288e+06	1.30251e+07	0.108444	0.182079	mouse
268	623	1.30251e+07	A	0.182079	Pard3b;Pard3b	PAR3-beta;PAR3-beta iso 2	§366; §366	Partitioning defective 3 homolog B	PAR3L_MOUSE|Q9CSB4;PAR3L_MOUSE|Q9CSB4-2	http://www.phosphosite.org/proteinAction.do?id=7517&showAllSites=true	KPSSPS*LSPLMGFGSK	3	567.276	1	A	70.68	8.12786e+06	9.4779e+06	1.4702e+07	1.13481e+07	8.80288e+06	1.30251e+07	0.108444	0.182079	mouse
269	624	7.63038e+07	A	0.176596	Pard3b;Pard3b	PAR3-beta;PAR3-beta iso 2	§990; §990	Partitioning defective 3 homolog B	PAR3L_MOUSE|Q9CSB4;PAR3L_MOUSE|Q9CSB4-2	http://www.phosphosite.org/proteinAction.do?id=7517&showAllSites=true	DGRPLS*PDHLEGLYAK	3	616.628	4	A	58.1	6.29096e+07	7.08944e+07	8.58321e+07	6.67756e+07	6.6902e+07	7.63038e+07	0.0843943	0.176596	mouse
270	625	1.29511e+07	A	0.379914	Pard3b;Pard3b	PAR3-beta;PAR3-beta iso 2	140; 140	Partitioning defective 3 homolog B	PAR3L_MOUSE|Q9CSB4;PAR3L_MOUSE|Q9CSB4-2	http://www.phosphosite.org/proteinAction.do?id=7517&showAllSites=true	RS*SDPAPGPHADAQPSTASLSGQSLK	3	881.412	1	A	39.23	5722038	9925620	10691152	15211081	7823829	1.29511e+07	0.379914	0.24678	mouse
271	626	4.18127e+07	A	0.178227	Pdlim5;Nmt2;Pdlim5;Pdlim5	LIM;NMT2;LIM iso3 iso 2;LIM iso3 iso 3	§80; 352; 80; 80	PDZ and LIM domain protein 5	PDLI5_MOUSE|Q8CI51;NMT2_MOUSE|O70311;PDLI5_MOUSE|Q8CI51-2;PDLI5_MOUSE|Q8CI51-3	http://www.phosphosite.org/proteinAction.do?id=3425&showAllSites=true	NMT*LQR	2	421.683	1	A	26.94	4.40749e+07	3.95505e+07	3.95962e+07	3.07329e+07	4.18127e+07	3.51646e+07	0.0765143	0.178227	mouse
272	628	9.06847e+07	A	0.137875	Pdlim5;Pdlim5	LIM;LIM iso3 iso 2	208; 208	PDZ and LIM domain protein 5	PDLI5_MOUSE|Q8CI51;PDLI5_MOUSE|Q8CI51-2	http://www.phosphosite.org/proteinAction.do?id=3425&showAllSites=true	QPT*VTSVCSESAQELAEGQR	3	752.998	2	A	57.215	6.68096e+07	5.49399e+07	9.17038e+07	8.96656e+07	6.08748e+07	9.06847e+07	0.137875	0.0158925	mouse
273	645	1.13995e+09	A	0.0771928	Pex14	PEX14	§232	Peroxisomal membrane protein PEX14	PEX14_MOUSE|Q9R0A0	http://www.phosphosite.org/proteinAction.do?id=6953&showAllSites=true	QFPPS*PSAPK	2	568.263	85	A	40.8975	9.10545e+08	1.01569e+09	1.18374e+09	1.09616e+09	9.63115e+08	1.13995e+09	0.0771928	0.0543297	mouse
274	655	3.15602e+07	A	0.41299	Pik3ap1;Pik3ap1	BCAP;BCAP iso 2	§591; 412	Phosphoinositide 3-kinase adapter protein 1	BCAP_MOUSE|Q9EQ32;BCAP_MOUSE|Q9EQ32-2	http://www.phosphosite.org/proteinAction.do?id=1112&showAllSites=true	DRPPS*SIYDPFAGM#K	3	592.927	2	A	73.055	4.01395e+07	2.29809e+07	2.9766e+07	1.63104e+07	3.15602e+07	2.30382e+07	0.384438	0.41299	mouse
275	659	4.58249e+07	A	0.176541	Pik3ap1;Pik3ap1	BCAP;BCAP iso 2	§592; 413	Phosphoinositide 3-kinase adapter protein 1	BCAP_MOUSE|Q9EQ32;BCAP_MOUSE|Q9EQ32-2	http://www.phosphosite.org/proteinAction.do?id=1112&showAllSites=true	DRPPSS*IYDPFAGMK	3	587.595	11	A	75.705	3.70528e+07	4.76231e+07	5.01357e+07	4.1514e+07	4.2338e+07	4.58249e+07	0.176541	0.133037	mouse
276	661	1.45615e+07	A	0.436394	Pik3ap1;Pik3ap1	BCAP;BCAP iso 2	594; 415	Phosphoinositide 3-kinase adapter protein 1	BCAP_MOUSE|Q9EQ32;BCAP_MOUSE|Q9EQ32-2	http://www.phosphosite.org/proteinAction.do?id=1112&showAllSites=true	DRPPSSIY*DPFAGMK	2	880.889	4	A	78.7333	9.82154e+06	1.85881e+07	1.55782e+07	1.35449e+07	1.42048e+07	1.45615e+07	0.436394	0.0987362	mouse
277	662	7.49603e+06	A	0.0873612	Plekho1	PLEKHO1	§226	Pleckstrin homology domain-containing family O member 1	PKHO1_MOUSE|Q9JIY0	http://www.phosphosite.org/proteinAction.do?id=21219&showAllSites=true	ADS*DRIQPSSQR	3	480.547	1	A	17.5	2.40263e+06	2.71901e+06	7.21294e+06	7.77912e+06	2.56082e+06	7.49603e+06	0.0873612	0.053408	mouse
278	663	3.02844e+07	A	0.26673	Ppfibp1;Ppfibp1;Ppfibp1	liprin beta 1;liprin beta 1 iso4 iso 2;liprin beta 1 iso4 iso 3	§560; 284; 571	Liprin-beta-1	LIPB1_MOUSE|Q8C8U0;LIPB1_MOUSE|Q8C8U0-2;LIPB1_MOUSE|Q8C8U0-3	http://www.phosphosite.org/proteinAction.do?id=11208&showAllSites=true	SQS*TTFNPDDMSEPEFK	2	1020.4	1	A	63.87	1.9429e+07	2.84615e+07	3.33726e+07	2.71961e+07	2.39452e+07	3.02844e+07	0.26673	0.144214	mouse
279	665	3.02844e+07	A	0.26673	Ppfibp1;Ppfibp1;Ppfibp1	liprin beta 1;liprin beta 1 iso4 iso 2;liprin beta 1 iso4 iso 3	§562; 286; 573	Liprin-beta-1	LIPB1_MOUSE|Q8C8U0;LIPB1_MOUSE|Q8C8U0-2;LIPB1_MOUSE|Q8C8U0-3	http://www.phosphosite.org/proteinAction.do?id=11208&showAllSites=true	SQSTT*FNPDDMSEPEFK	2	1020.4	3	A	63.87	1.9429e+07	2.84615e+07	3.33726e+07	2.71961e+07	2.39452e+07	3.02844e+07	0.26673	0.144214	mouse
280	671	452320496	A	0.25583	Ppfibp1;Ppfibp1;Ppfibp1	liprin beta 1;liprin beta 1 iso4 iso 2;liprin beta 1 iso4 iso 3	§753; 477; 764	Liprin-beta-1	LIPB1_MOUSE|Q8C8U0;LIPB1_MOUSE|Q8C8U0-2;LIPB1_MOUSE|Q8C8U0-3	http://www.phosphosite.org/proteinAction.do?id=11208&showAllSites=true	RRPS*DENSITPSEVQQWTNHR	4	655.053	14	A	54.69	449498720	455142272	287160896	199182032	452320496	243171464	0.00882249	0.25583	mouse
281	674	3.10066e+07	A	0.21116	Ppfibp1;Ppfibp1;Ppfibp1	liprin beta 1;liprin beta 1 iso4 iso 2;liprin beta 1 iso4 iso 3	§757; 481; 768	Liprin-beta-1	LIPB1_MOUSE|Q8C8U0;LIPB1_MOUSE|Q8C8U0-2;LIPB1_MOUSE|Q8C8U0-3	http://www.phosphosite.org/proteinAction.do?id=11208&showAllSites=true	RRPSDENS*ITPSEVQQWTNHR	3	873.068	5	A	54.6667	3.56362e+07	2.63769e+07	7.64818e+06	6.83904e+06	3.10066e+07	7.24361e+06	0.21116	0.0789866	mouse
282	676	4.71895e+07	A	0.173595	Ppfibp1;Ppfibp1;Ppfibp1	liprin beta 1;liprin beta 1 iso4 iso 2;liprin beta 1 iso4 iso 3	§957; 681; 968	Liprin-beta-1	LIPB1_MOUSE|Q8C8U0;LIPB1_MOUSE|Q8C8U0-2;LIPB1_MOUSE|Q8C8U0-3	http://www.phosphosite.org/proteinAction.do?id=11208&showAllSites=true	S*PSASITDEDSNV	2	701.274	1	A	47.83	3.82931e+07	4.90095e+07	4.49937e+07	4.93854e+07	4.36513e+07	4.71895e+07	0.173595	0.0658065	mouse
283	677	4.71895e+07	A	0.173595	Ppfibp1;Ppfibp1;Ppfibp1	liprin beta 1;liprin beta 1 iso4 iso 2;liprin beta 1 iso4 iso 3	§961; 685; 972	Liprin-beta-1	LIPB1_MOUSE|Q8C8U0;LIPB1_MOUSE|Q8C8U0-2;LIPB1_MOUSE|Q8C8U0-3	http://www.phosphosite.org/proteinAction.do?id=11208&showAllSites=true	SPSAS*ITDEDSNV	2	701.274	1	A	47.83	3.82931e+07	4.90095e+07	4.49937e+07	4.93854e+07	4.36513e+07	4.71895e+07	0.173595	0.0658065	mouse
284	678	5.91987e+08	A	0.100034	Ranbp3	RANBP3	§58	Ran-binding protein 3	RANB3_MOUSE|Q9CT10	http://www.phosphosite.org/proteinAction.do?id=16581&showAllSites=true	TSS*LTHSEEK	2	599.753	8	A	14.7225	4.32386e+08	4.27648e+08	6.3386e+08	5.50113e+08	4.30017e+08	5.91987e+08	0.00779024	0.100034	mouse
285	680	2.18705e+07	A	0.786308	Ranbp9;Ranbp9	RANBP9;RANBP9 iso 2	§402, §407, §410; 295, 300, 303	Ran-binding protein 9	RANB9_MOUSE|P69566;RANB9_MOUSE|P69566-2	http://www.phosphosite.org/proteinAction.do?id=9789&showAllSites=true	SQDSYPVS*PRPFS*SPS*M#SPSHGMSIHSLAPGK	4	903.625	1	A	63.82	2.35043e+07	6.70682e+06	2.99535e+07	1.37876e+07	1.51056e+07	2.18705e+07	0.786308	0.522667	mouse
286	681	1.24931e+08	A	0.280108	Ranbp9;Ranbp9	RANBP9;RANBP9 iso 2	§402, §407; 295, 300	Ran-binding protein 9	RANB9_MOUSE|P69566;RANB9_MOUSE|P69566-2	http://www.phosphosite.org/proteinAction.do?id=9789&showAllSites=true	SQDSYPVS*PRPFS*SPSMSPSHGMSIHSLAPGK	4	879.635	1	A	59.495	8.7494e+07	1.30714e+08	1.30613e+08	1.1925e+08	1.09104e+08	1.24931e+08	0.280108	0.0643121	mouse
287	684	1.24931e+08	A	0.280108	Ranbp9;Ranbp9	RANBP9;RANBP9 iso 2	§402, §408; 295, 301	Ran-binding protein 9	RANB9_MOUSE|P69566;RANB9_MOUSE|P69566-2	http://www.phosphosite.org/proteinAction.do?id=9789&showAllSites=true	SQDSYPVS*PRPFSS*PSMSPSHGMSIHSLAPGK	4	879.635	3	A	59.495	8.7494e+07	1.30714e+08	1.30613e+08	1.1925e+08	1.09104e+08	1.24931e+08	0.280108	0.0643121	mouse
288	686	1.24931e+08	A	0.280108	Ranbp9;Ranbp9	RANBP9;RANBP9 iso 2	§402, §410; 295, 303	Ran-binding protein 9	RANB9_MOUSE|P69566;RANB9_MOUSE|P69566-2	http://www.phosphosite.org/proteinAction.do?id=9789&showAllSites=true	SQDSYPVS*PRPFSSPS*MSPSHGMSIHSLAPGK	4	879.635	2	A	59.495	8.7494e+07	1.30714e+08	1.30613e+08	1.1925e+08	1.09104e+08	1.24931e+08	0.280108	0.0643121	mouse
289	688	1.24931e+08	A	0.280108	Ranbp9;Ranbp9	RANBP9;RANBP9 iso 2	§402, §412; 295, 305	Ran-binding protein 9	RANB9_MOUSE|P69566;RANB9_MOUSE|P69566-2	http://www.phosphosite.org/proteinAction.do?id=9789&showAllSites=true	SQDSYPVS*PRPFSSPSMS*PSHGMSIHSLAPGK	4	879.635	3	A	59.495	8.7494e+07	1.30714e+08	1.30613e+08	1.1925e+08	1.09104e+08	1.24931e+08	0.280108	0.0643121	mouse
290	693	5.93144e+07	A	0.395421	Ranbp9;Ranbp9	RANBP9;RANBP9 iso 2	§402; 295	Ran-binding protein 9	RANB9_MOUSE|P69566;RANB9_MOUSE|P69566-2	http://www.phosphosite.org/proteinAction.do?id=9789&showAllSites=true	SQDSYPVS*PRPFSSPSMSPSHGMSIHSLAPGK	4	859.643	17	A	56.79	3.84451e+07	6.82882e+07	6.49864e+07	5.36424e+07	5.33666e+07	5.93144e+07	0.395421	0.135235	mouse
291	694	26137074	A	0.413028	Ranbp9;Ranbp9	RANBP9;RANBP9 iso 2	§407, §408, §410; 300, 301, 303	Ran-binding protein 9	RANB9_MOUSE|P69566;RANB9_MOUSE|P69566-2	http://www.phosphosite.org/proteinAction.do?id=9789&showAllSites=true	SQDSYPVSPRPFS*S*PS*MSPSHGMSIHSLAPGK	4	899.626	1	A	69.59	12424020	6807395	33358624	18915524	9.61571e+06	26137074	0.413028	0.390741	mouse
292	695	4.79011e+07	A	0.439012	Ranbp9;Ranbp9	RANBP9;RANBP9 iso 2	§407, §408; 300, 301	Ran-binding protein 9	RANB9_MOUSE|P69566;RANB9_MOUSE|P69566-2	http://www.phosphosite.org/proteinAction.do?id=9789&showAllSites=true	SQDSYPVSPRPFS*S*PSMSPSHGM#SIHSLAPGK	4	883.633	1	A	56.02	6.2771e+07	3.30313e+07	3.81624e+07	3.02205e+07	4.79011e+07	3.41914e+07	0.439012	0.164247	mouse
293	696	4.79011e+07	A	0.439012	Ranbp9;Ranbp9	RANBP9;RANBP9 iso 2	§407, §410; 300, 303	Ran-binding protein 9	RANB9_MOUSE|P69566;RANB9_MOUSE|P69566-2	http://www.phosphosite.org/proteinAction.do?id=9789&showAllSites=true	SQDSYPVSPRPFS*SPS*MSPSHGM#SIHSLAPGK	4	883.633	1	A	56.02	6.2771e+07	3.30313e+07	3.81624e+07	3.02205e+07	4.79011e+07	3.41914e+07	0.439012	0.164247	mouse
294	697	2.65997e+07	A	0.115644	Ranbp9;Ranbp9	RANBP9;RANBP9 iso 2	§410; 303	Ran-binding protein 9	RANB9_MOUSE|P69566;RANB9_MOUSE|P69566-2	http://www.phosphosite.org/proteinAction.do?id=9789&showAllSites=true	SSPS*M#SPSHGMSIHSLAPGK	3	697.639	2	A	39.02	2.87453e+07	2.44542e+07	2.72122e+07	2.30982e+07	2.65997e+07	2.51552e+07	0.114071	0.115644	mouse
295	700	1.18074e+08	A	0.292187	Ranbp9;Ranbp9	RANBP9;RANBP9 iso 2	§412; 305	Ran-binding protein 9	RANB9_MOUSE|P69566;RANB9_MOUSE|P69566-2	http://www.phosphosite.org/proteinAction.do?id=9789&showAllSites=true	SSPSMS*PSHGMSIHSLAPGK	3	692.308	6	A	45.4425	8.83017e+07	1.34291e+08	1.22299e+08	1.13848e+08	1.11296e+08	1.18074e+08	0.292187	0.0506115	mouse
296	701	2.65997e+07	A	0.115644	Ranbp9;Ranbp9	RANBP9;RANBP9 iso 2	§414; 307	Ran-binding protein 9	RANB9_MOUSE|P69566;RANB9_MOUSE|P69566-2	http://www.phosphosite.org/proteinAction.do?id=9789&showAllSites=true	SSPSM#SPS*HGMSIHSLAPGK	3	697.639	1	A	39.02	2.87453e+07	2.44542e+07	2.72122e+07	2.30982e+07	2.65997e+07	2.51552e+07	0.114071	0.115644	mouse
297	702	4.79011e+07	A	0.439012	Ranbp9;Ranbp9	RANBP9;RANBP9 iso 2	§418, §421; 311, 314	Ran-binding protein 9	RANB9_MOUSE|P69566;RANB9_MOUSE|P69566-2	http://www.phosphosite.org/proteinAction.do?id=9789&showAllSites=true	SQDSYPVSPRPFSSPSMSPSHGM#S*IHS*LAPGK	4	883.633	1	A	56.02	6.2771e+07	3.30313e+07	3.81624e+07	3.02205e+07	4.79011e+07	3.41914e+07	0.439012	0.164247	mouse
298	703	2.18705e+07	A	0.786308	Ranbp9;Ranbp9	RANBP9;RANBP9 iso 2	399, §407, §421; 292, 300, 314	Ran-binding protein 9	RANB9_MOUSE|P69566;RANB9_MOUSE|P69566-2	http://www.phosphosite.org/proteinAction.do?id=9789&showAllSites=true	SQDSY*PVSPRPFS*SPSMSPSHGM#SIHS*LAPGK	4	903.625	1	A	63.82	2.35043e+07	6.70682e+06	2.99535e+07	1.37876e+07	1.51056e+07	2.18705e+07	0.786308	0.522667	mouse
299	704	5.93144e+07	A	0.395421	Ranbp9;Ranbp9	RANBP9;RANBP9 iso 2	399; 292	Ran-binding protein 9	RANB9_MOUSE|P69566;RANB9_MOUSE|P69566-2	http://www.phosphosite.org/proteinAction.do?id=9789&showAllSites=true	SQDSY*PVSPRPFSSPSMSPSHGMSIHSLAPGK	4	859.643	1	A	56.79	3.84451e+07	6.82882e+07	6.49864e+07	5.36424e+07	5.33666e+07	5.93144e+07	0.395421	0.135235	mouse
300	705	7.55058e+07	A	0.256589	Reps2	REPS2	119	RalBP1-associated Eps domain-containing protein 2	REPS2_MOUSE|Q80XA6	http://www.phosphosite.org/proteinAction.do?id=20883&showAllSites=true	SFS*VEREPQENNSNYPDEPWR	3	887.373	4	A	61.455	5.25714e+07	5.04519e+07	8.92052e+07	6.18063e+07	5.15116e+07	7.55058e+07	0.0290947	0.256589	mouse
301	706	1.03418e+08	A	0.194871	Reps2	REPS2	405	RalBP1-associated Eps domain-containing protein 2	REPS2_MOUSE|Q80XA6	http://www.phosphosite.org/proteinAction.do?id=20883&showAllSites=true	APS*QAAESSPTK	2	627.274	3	A	15.7867	6.18562e+07	8.16274e+07	9.61413e+07	1.10694e+08	7.17418e+07	1.03418e+08	0.194871	0.0995041	mouse
302	709	2.26763e+07	A	0.115601	Rictor;Rictor	RICTOR;RICTOR iso 2	§1135, §1138; 983, 986	Rapamycin-insensitive companion of mTOR	RICTR_MOUSE|Q6QI06;RICTR_MOUSE|Q6QI06-2	http://www.phosphosite.org/proteinAction.do?id=10422&showAllSites=true	TLT*EPS*VDLNHSEDFTSSSAQK	3	851.686	10	A	59.37	1.80692e+07	2.12862e+07	2.29922e+07	2.23604e+07	1.96777e+07	2.26763e+07	0.115601	0.0197009	mouse
303	710	2.26763e+07	A	0.115601	Rictor;Rictor	RICTOR;RICTOR iso 2	§1135, 1144; 983, 992	Rapamycin-insensitive companion of mTOR	RICTR_MOUSE|Q6QI06;RICTR_MOUSE|Q6QI06-2	http://www.phosphosite.org/proteinAction.do?id=10422&showAllSites=true	TLT*EPSVDLNHS*EDFTSSSAQK	3	851.686	1	A	59.37	1.80692e+07	2.12862e+07	2.29922e+07	2.23604e+07	1.96777e+07	2.26763e+07	0.115601	0.0197009	mouse
304	714	1.93139e+09	A	0.133172	Rictor;Rictor	RICTOR;RICTOR iso 2	§1135; 983	Rapamycin-insensitive companion of mTOR	RICTR_MOUSE|Q6QI06;RICTR_MOUSE|Q6QI06-2	http://www.phosphosite.org/proteinAction.do?id=10422&showAllSites=true	TLT*EPSVDLNHSEDFTSSSAQK	3	825.03	13	A	56.9725	1.83262e+09	2.03015e+09	1.81324e+09	1.50114e+09	1.93139e+09	1.65719e+09	0.0723183	0.133172	mouse
305	715	8.48521e+07	A	0.446651	Rictor;Rictor	RICTOR;RICTOR iso 2	§1138; 986	Rapamycin-insensitive companion of mTOR	RICTR_MOUSE|Q6QI06;RICTR_MOUSE|Q6QI06-2	http://www.phosphosite.org/proteinAction.do?id=10422&showAllSites=true	TLTEPS*VDLNHSEDFTSSSAQK	2	1237.04	3	A	56.6167	5.80533e+07	1.11651e+08	7.33657e+07	4.25301e+07	8.48521e+07	5.79479e+07	0.446651	0.37627	mouse
306	716	3.22268e+07	A	0.066832	Rictor;Rictor	RICTOR;RICTOR iso 2	§1385; 1233	Rapamycin-insensitive companion of mTOR	RICTR_MOUSE|Q6QI06;RICTR_MOUSE|Q6QI06-2	http://www.phosphosite.org/proteinAction.do?id=10422&showAllSites=true	ALSY*ASLDKEDLLSPINHNTLQR	3	893.444	6	A	75.0075	3.27526e+07	3.17009e+07	2.63839e+07	2.40028e+07	3.22268e+07	2.51933e+07	0.0230774	0.066832	mouse
307	718	5.54264e+07	A	0.0507715	Rusc2;Rusc2	RUSC2;RUSC2 iso 2	§517; §517	Iporin	RUSC2_MOUSE|Q80U22;RUSC2_MOUSE|Q80U22-2	http://www.phosphosite.org/proteinAction.do?id=15828&showAllSites=true	MLS*CPVR	2	471.7	3	A	40.8633	3.77874e+07	3.95823e+07	5.74162e+07	5.34365e+07	3.86849e+07	5.54264e+07	0.0328081	0.0507715	mouse
308	720	5.3297e+07	A	0.128644	Rusc2;Rusc2	RUSC2;RUSC2 iso 2	§534; §534	Iporin	RUSC2_MOUSE|Q80U22;RUSC2_MOUSE|Q80U22-2	http://www.phosphosite.org/proteinAction.do?id=15828&showAllSites=true	LSEGPAALAGPAS*PPR	2	785.885	7	A	52.12	4.00345e+07	4.80469e+07	5.24347e+07	5.41593e+07	4.40407e+07	5.3297e+07	0.128644	0.0228819	mouse
309	721	8.48018e+06	A	0.132082	Sash3	SLY	§145	SAM and SH3 domain-containing protein 3	SASH3_MOUSE|Q8K352	http://www.phosphosite.org/proteinAction.do?id=9945&showAllSites=true	QT*STGSELCSPGPGSGSFLEESPAPQYTGPFCGR	3	1209.18	1	A	84.32	7.3495e+06	6.63289e+06	9.27219e+06	7.68816e+06	6.9912e+06	8.48018e+06	0.0724801	0.132082	mouse
310	724	437493072	A	0.120769	Sash3	SLY	§7	SAM and SH3 domain-containing protein 3	SASH3_MOUSE|Q8K352	http://www.phosphosite.org/proteinAction.do?id=9945&showAllSites=true	RKPS*NASDKEPTQK	3	555.937	10	A	11.6575	350883840	416408064	450125856	424860288	383645952	437493072	0.120769	0.040836	mouse
311	725	16795119	A	0.0542095	Sash3	SLY	§7, §10	SAM and SH3 domain-containing protein 3	SASH3_MOUSE|Q8K352	http://www.phosphosite.org/proteinAction.do?id=9945&showAllSites=true	RKPS*NAS*DKEPTQK	3	582.592	1	A	11.95	12691739	12714276	16151330	17438908	1.2703e+07	16795119	0.00125451	0.0542095	mouse
312	726	8.48018e+06	A	0.132082	Sash3	SLY	160	SAM and SH3 domain-containing protein 3	SASH3_MOUSE|Q8K352	http://www.phosphosite.org/proteinAction.do?id=9945&showAllSites=true	QTSTGSELCSPGPGSGS*FLEESPAPQYTGPFCGR	3	1209.18	1	A	84.32	7.3495e+06	6.63289e+06	9.27219e+06	7.68816e+06	6.9912e+06	8.48018e+06	0.0724801	0.132082	mouse
313	728	5.30411e+07	A	0.129959	Sh3bp1	SH3BP1	§553	SH3 domain-binding protein 1	3BP1_MOUSE|P55194	http://www.phosphosite.org/proteinAction.do?id=9582&showAllSites=true	RLPAS*PVISNMPAQVDQGVATEDR	3	877.758	5	A	64.665	4.94022e+07	5.668e+07	4.32915e+07	3.60046e+07	5.30411e+07	3.96481e+07	0.097022	0.129959	mouse
314	731	8.69835e+07	A	0.21531	Sh3pxd2a	Tks5	§256	SH3 and PX domain-containing protein 2A	SPD2A_MOUSE|O89032	http://www.phosphosite.org/proteinAction.do?id=7345&showAllSites=true	RWT*LGGMVNR	3	423.869	17	A	58.8875	6.24915e+07	7.78004e+07	1.00226e+08	7.37405e+07	7.0146e+07	8.69835e+07	0.154322	0.21531	mouse
315	734	8.79894e+07	A	0.237214	Sh3pxd2a;Sh3pxd2a;Sh3pxd2a	Tks5;Tks5 iso 2;Tks5 iso 3	§1007, §1008; 979, 980; 964, 965	SH3 and PX domain-containing protein 2A	SPD2A_MOUSE|O89032;SPD2A_MOUSE|O89032-2;SPD2A_MOUSE|O89032-3	http://www.phosphosite.org/proteinAction.do?id=7345&showAllSites=true	RNS*S*FSTAR	2	593.226	3	A	19.9133	3.47472e+07	4.37136e+07	1.02748e+08	7.32305e+07	3.92304e+07	8.79894e+07	0.161615	0.237214	mouse
316	735	1.6263e+08	A	0.201241	Sh3pxd2a;Sh3pxd2a;Sh3pxd2a	Tks5;Tks5 iso 2;Tks5 iso 3	§1007; 979; 964	SH3 and PX domain-containing protein 2A	SPD2A_MOUSE|O89032;SPD2A_MOUSE|O89032-2;SPD2A_MOUSE|O89032-3	http://www.phosphosite.org/proteinAction.do?id=7345&showAllSites=true	RNS*SFSTAR	2	553.243	3	A	17.7733	1.0124e+08	1.34833e+08	1.63713e+08	1.61547e+08	1.18037e+08	1.6263e+08	0.201241	0.00941851	mouse
317	736	8.68569e+07	A	0.122524	Sh3pxd2a;Sh3pxd2a;Sh3pxd2a	Tks5;Tks5 iso 2;Tks5 iso 3	§1008; 980; 965	SH3 and PX domain-containing protein 2A	SPD2A_MOUSE|O89032;SPD2A_MOUSE|O89032-2;SPD2A_MOUSE|O89032-3	http://www.phosphosite.org/proteinAction.do?id=7345&showAllSites=true	NSS*FSTAR	2	475.192	6	A	19.8575	6.27182e+07	7.2039e+07	9.4382e+07	7.93319e+07	6.73786e+07	8.68569e+07	0.0978176	0.122524	mouse
318	739	5.85323e+07	A	0.280444	Sh3pxd2a;Sh3pxd2a;Sh3pxd2a	Tks5;Tks5 iso 2;Tks5 iso 3	§405; 377; 362	SH3 and PX domain-containing protein 2A	SPD2A_MOUSE|O89032;SPD2A_MOUSE|O89032-2;SPD2A_MOUSE|O89032-3	http://www.phosphosite.org/proteinAction.do?id=7345&showAllSites=true	LAQGS*PAVAR	2	525.261	4	A	22.3633	3.40756e+07	5.09331e+07	5.82827e+07	5.87819e+07	4.25044e+07	5.85323e+07	0.280444	0.00602997	mouse
319	740	1.69933e+08	A	0.117683	Sh3pxd2a;Sh3pxd2a;Sh3pxd2a	Tks5;Tks5 iso 2;Tks5 iso 3	§419; 391; 376	SH3 and PX domain-containing protein 2A	SPD2A_MOUSE|O89032;SPD2A_MOUSE|O89032-2;SPD2A_MOUSE|O89032-3	http://www.phosphosite.org/proteinAction.do?id=7345&showAllSites=true	AQIS*SPNLR	2	533.258	1	A	33.22	1.19223e+08	1.40867e+08	1.67918e+08	1.71949e+08	1.30045e+08	1.69933e+08	0.117683	0.0167725	mouse
320	741	1.69933e+08	A	0.117683	Sh3pxd2a;Sh3pxd2a;Sh3pxd2a	Tks5;Tks5 iso 2;Tks5 iso 3	§420; 392; 377	SH3 and PX domain-containing protein 2A	SPD2A_MOUSE|O89032;SPD2A_MOUSE|O89032-2;SPD2A_MOUSE|O89032-3	http://www.phosphosite.org/proteinAction.do?id=7345&showAllSites=true	AQISS*PNLR	2	533.258	3	A	33.22	1.19223e+08	1.40867e+08	1.67918e+08	1.71949e+08	1.30045e+08	1.69933e+08	0.117683	0.0167725	mouse
321	743	8.71067e+07	A	0.355212	Sh3pxd2a;Sh3pxd2a;Sh3pxd2a	Tks5;Tks5 iso 2;Tks5 iso 3	§514, §515; 486, 487; 471, 472	SH3 and PX domain-containing protein 2A	SPD2A_MOUSE|O89032;SPD2A_MOUSE|O89032-2;SPD2A_MOUSE|O89032-3	http://www.phosphosite.org/proteinAction.do?id=7345&showAllSites=true	RTS*T*LTRPK	3	407.191	4	A	16.485	2.98125e+07	4.98119e+07	1.04888e+08	6.93254e+07	3.98122e+07	8.71067e+07	0.355212	0.288686	mouse
322	744	1.40141e+08	A	0.0601103	Sh3pxd2a;Sh3pxd2a;Sh3pxd2a	Tks5;Tks5 iso 2;Tks5 iso 3	§514; 486; 471	SH3 and PX domain-containing protein 2A	SPD2A_MOUSE|O89032;SPD2A_MOUSE|O89032-2;SPD2A_MOUSE|O89032-3	http://www.phosphosite.org/proteinAction.do?id=7345&showAllSites=true	RTS*TLTRPK	2	570.3	2	A	14.725	1.33417e+08	1.22538e+08	1.35595e+08	1.44687e+08	1.27978e+08	1.40141e+08	0.0601103	0.0458742	mouse
323	746	6.47925e+08	A	0.107893	Sh3pxd2a;Sh3pxd2a;Sh3pxd2a	Tks5;Tks5 iso 2;Tks5 iso 3	§515; 487; 472	SH3 and PX domain-containing protein 2A	SPD2A_MOUSE|O89032;SPD2A_MOUSE|O89032-2;SPD2A_MOUSE|O89032-3	http://www.phosphosite.org/proteinAction.do?id=7345&showAllSites=true	RTST*LTRPK	3	380.536	6	A	14.7867	4.67331e+08	4.35559e+08	6.97356e+08	5.98494e+08	4.51445e+08	6.47925e+08	0.0497655	0.107893	mouse
324	749	6.68812e+07	A	0.431125	Sh3pxd2a;Sh3pxd2a;Sh3pxd2a	Tks5;Tks5 iso 2;Tks5 iso 3	§592; 564; 549	SH3 and PX domain-containing protein 2A	SPD2A_MOUSE|O89032;SPD2A_MOUSE|O89032-2;SPD2A_MOUSE|O89032-3	http://www.phosphosite.org/proteinAction.do?id=7345&showAllSites=true	RIS*PASSLQR	3	398.871	4	A	30.4167	2.60749e+07	3.04593e+07	8.727e+07	4.64923e+07	2.82671e+07	6.68812e+07	0.109677	0.431125	mouse
325	751	2.58101e+08	A	0.124487	Sh3pxd2a;Sh3pxd2a;Sh3pxd2a	Tks5;Tks5 iso 2;Tks5 iso 3	§993; 965; 950	SH3 and PX domain-containing protein 2A	SPD2A_MOUSE|O89032;SPD2A_MOUSE|O89032-2;SPD2A_MOUSE|O89032-3	http://www.phosphosite.org/proteinAction.do?id=7345&showAllSites=true	RNES*LTATDSLR	2	721.835	9	A	39.465	1.73343e+08	2.06806e+08	2.61461e+08	2.54742e+08	1.90074e+08	2.58101e+08	0.124487	0.0184083	mouse
326	753	1.55277e+08	A	0.155439	Sh3pxd2a;Sh3pxd2a;Sh3pxd2a	Tks5;Tks5 iso 2;Tks5 iso 3	§995; 967; 952	SH3 and PX domain-containing protein 2A	SPD2A_MOUSE|O89032;SPD2A_MOUSE|O89032-2;SPD2A_MOUSE|O89032-3	http://www.phosphosite.org/proteinAction.do?id=7345&showAllSites=true	RNESLT*ATDSLR	3	481.559	2	A	34.99	7.51054e+07	8.77585e+07	1.72344e+08	1.38211e+08	8.14319e+07	1.55277e+08	0.109873	0.155439	mouse
327	755	1.88426e+08	A	0.11387	Slc9a3r1	NHERF	§285	Na(+)/H(+) exchange regulatory cofactor NHE-RF1	NHRF1_MOUSE|P70441	http://www.phosphosite.org/proteinAction.do?id=5588&showAllSites=true	SAS*SDTSEELNSQDSPK	2	931.37	3	A	30.3867	1.03769e+08	1.21943e+08	1.81283e+08	1.95569e+08	1.12856e+08	1.88426e+08	0.11387	0.0536125	mouse
328	756	1.55454e+08	A	0.148364	Snta1	SNTA1	§178	Alpha-1-syntrophin	SNTA1_MOUSE|Q61234	http://www.phosphosite.org/proteinAction.do?id=16617&showAllSites=true	NSAGGTS*VGWDSPPASPLQR	3	688.644	1	A	62.92	1.00575e+08	8.14759e+07	1.64259e+08	1.46648e+08	9.10252e+07	1.55454e+08	0.148364	0.080107	mouse
329	759	1.81058e+08	A	0.165094	Snta1	SNTA1	§183	Alpha-1-syntrophin	SNTA1_MOUSE|Q61234	http://www.phosphosite.org/proteinAction.do?id=16617&showAllSites=true	NSAGGTSVGWDS*PPASPLQR	2	1032.46	19	A	62.97	1.23587e+08	1.36703e+08	2.02194e+08	1.59921e+08	1.30145e+08	1.81058e+08	0.0712619	0.165094	mouse
330	766	8.857e+08	A	0.0823917	Snta1	SNTA1	§194	Alpha-1-syntrophin	SNTA1_MOUSE|Q61234	http://www.phosphosite.org/proteinAction.do?id=16617&showAllSites=true	QPS*SPGPQPR	2	565.753	16	A	18.4925	4.5266e+08	5.08666e+08	9.03067e+08	8.68334e+08	4.80663e+08	8.857e+08	0.0823917	0.0277293	mouse
331	769	1.01128e+08	A	0.0538717	Snta1	SNTA1	§194, §195	Alpha-1-syntrophin	SNTA1_MOUSE|Q61234	http://www.phosphosite.org/proteinAction.do?id=16617&showAllSites=true	QPS*S*PGPQPR	2	605.736	10	A	17.7275	4.98391e+07	5.37865e+07	1.00128e+08	1.02128e+08	5.18128e+07	1.01128e+08	0.0538717	0.0139825	mouse
332	770	8.857e+08	A	0.0823917	Snta1	SNTA1	§195	Alpha-1-syntrophin	SNTA1_MOUSE|Q61234	http://www.phosphosite.org/proteinAction.do?id=16617&showAllSites=true	QPSS*PGPQPR	2	565.753	1	A	18.4925	4.5266e+08	5.08666e+08	9.03067e+08	8.68334e+08	4.80663e+08	8.857e+08	0.0823917	0.0277293	mouse
333	771	1.55454e+08	A	0.148364	Snta1	SNTA1	177	Alpha-1-syntrophin	SNTA1_MOUSE|Q61234	http://www.phosphosite.org/proteinAction.do?id=16617&showAllSites=true	NSAGGT*SVGWDSPPASPLQR	3	688.644	1	A	62.92	1.00575e+08	8.14759e+07	1.64259e+08	1.46648e+08	9.10252e+07	1.55454e+08	0.148364	0.080107	mouse
334	772	1.07186e+08	A	0.286485	Sorbs2;Sorbs2;Sorbs2;Sorbs2;Sorbs2	ArgBP2 iso1 iso 3;ArgBP2 iso1 iso 4;ArgBP2 iso5 iso 5;ArgBP2 iso1;ArgBP2 iso 2	362, 365; 347, 350; §442, 445; 378, 381; §493, §496	Sorbin and SH3 domain-containing protein 2	SRBS2_MOUSE|Q3UTJ2-3;SRBS2_MOUSE|Q3UTJ2-4;SRBS2_MOUSE|Q3UTJ2-5;SRBS2_MOUSE|Q3UTJ2;SRBS2_MOUSE|Q3UTJ2-2	http://www.phosphosite.org/proteinAction.do?id=7157716&showAllSites=true	SFISS*SPS*SPSR	2	699.771	1	A	44.59	3.95687e+07	5.40041e+07	1.28899e+08	8.54729e+07	4.67864e+07	1.07186e+08	0.21817	0.286485	mouse
335	774	1.07186e+08	A	0.286485	Sorbs2;Sorbs2;Sorbs2;Sorbs2;Sorbs2	ArgBP2 iso1 iso 3;ArgBP2 iso1 iso 4;ArgBP2 iso5 iso 5;ArgBP2 iso1;ArgBP2 iso 2	362, 366; 347, 351; §442, §446; 378, 382; §493, §497	Sorbin and SH3 domain-containing protein 2	SRBS2_MOUSE|Q3UTJ2-3;SRBS2_MOUSE|Q3UTJ2-4;SRBS2_MOUSE|Q3UTJ2-5;SRBS2_MOUSE|Q3UTJ2;SRBS2_MOUSE|Q3UTJ2-2	http://www.phosphosite.org/proteinAction.do?id=7157716&showAllSites=true	SFISS*SPSS*PSR	2	699.771	5	A	44.59	3.95687e+07	5.40041e+07	1.28899e+08	8.54729e+07	4.67864e+07	1.07186e+08	0.21817	0.286485	mouse
336	775	5.98875e+08	A	0.0799464	Sorbs2;Sorbs2;Sorbs2;Sorbs2;Sorbs2	ArgBP2 iso1 iso 3;ArgBP2 iso1 iso 4;ArgBP2 iso5 iso 5;ArgBP2 iso1;ArgBP2 iso 2	366; 351; §446; 382; §497	Sorbin and SH3 domain-containing protein 2	SRBS2_MOUSE|Q3UTJ2-3;SRBS2_MOUSE|Q3UTJ2-4;SRBS2_MOUSE|Q3UTJ2-5;SRBS2_MOUSE|Q3UTJ2;SRBS2_MOUSE|Q3UTJ2-2	http://www.phosphosite.org/proteinAction.do?id=7157716&showAllSites=true	SFISSSPSS*PSR	2	659.787	4	A	39.48	3.16394e+08	3.52657e+08	6.3273e+08	5.6502e+08	3.34526e+08	5.98875e+08	0.0766509	0.0799464	mouse
337	776	3.86607e+06	A	0.221617	Sorbs2;Sorbs2;Sorbs2;Sorbs2;Sorbs2;Sorbs2;Sorbs2	ArgBP2 iso1 iso 3;ArgBP2 iso1 iso 4;ArgBP2 iso5 iso 5;ArgBP2 iso1;ArgBP2 iso 2;ArgBP2 iso1 iso 6;ArgBP2 iso1 iso 7	102; 102; 110; 133; §133; 110; 133	Sorbin and SH3 domain-containing protein 2	SRBS2_MOUSE|Q3UTJ2-3;SRBS2_MOUSE|Q3UTJ2-4;SRBS2_MOUSE|Q3UTJ2-5;SRBS2_MOUSE|Q3UTJ2;SRBS2_MOUSE|Q3UTJ2-2;SRBS2_MOUSE|Q3UTJ2-6;SRBS2_MOUSE|Q3UTJ2-7	http://www.phosphosite.org/proteinAction.do?id=7157716&showAllSites=true	SLDS*AETYSQHAQ	2	758.801	1	A	37.05	1.54241e+06	2.11565e+06	4.30496e+06	3.42717e+06	1.82903e+06	3.86607e+06	0.221617	0.160548	mouse
338	777	43306534	A	0.203556	Sorbs2;Sorbs2;Sorbs2;Sorbs2;Sorbs2;Sorbs2;Sorbs2	ArgBP2 iso1 iso 3;ArgBP2 iso1 iso 4;ArgBP2 iso5 iso 5;ArgBP2 iso1;ArgBP2 iso 2;ArgBP2 iso1 iso 6;ArgBP2 iso1 iso 7	107; 107; 115; 138; §138; 115; 138	Sorbin and SH3 domain-containing protein 2	SRBS2_MOUSE|Q3UTJ2-3;SRBS2_MOUSE|Q3UTJ2-4;SRBS2_MOUSE|Q3UTJ2-5;SRBS2_MOUSE|Q3UTJ2;SRBS2_MOUSE|Q3UTJ2-2;SRBS2_MOUSE|Q3UTJ2-6;SRBS2_MOUSE|Q3UTJ2-7	http://www.phosphosite.org/proteinAction.do?id=7157716&showAllSites=true	SLDSAETYS*QHAQSLDGTMGSSIPLYR	3	998.778	1	A	77.04	24569484	32831572	43241816	43371252	28700528	43306534	0.203556	0.00211342	mouse
339	778	1.33231e+07	A	0.676633	Sorbs2;Sorbs2;Sorbs2;Sorbs2;Sorbs2;Sorbs2;Sorbs2	ArgBP2 iso1 iso 3;ArgBP2 iso1 iso 4;ArgBP2 iso5 iso 5;ArgBP2 iso1;ArgBP2 iso 2;ArgBP2 iso1 iso 6;ArgBP2 iso1 iso 7	112; 112; 120; 143; §143; 120; 143	Sorbin and SH3 domain-containing protein 2	SRBS2_MOUSE|Q3UTJ2-3;SRBS2_MOUSE|Q3UTJ2-4;SRBS2_MOUSE|Q3UTJ2-5;SRBS2_MOUSE|Q3UTJ2;SRBS2_MOUSE|Q3UTJ2-2;SRBS2_MOUSE|Q3UTJ2-6;SRBS2_MOUSE|Q3UTJ2-7	http://www.phosphosite.org/proteinAction.do?id=7157716&showAllSites=true	SLDSAETYSQHAQS*LDGTM#GSSIPLYR	3	1004.11	2	A	66.1	1.46865e+07	5.18092e+06	1.67503e+07	9.89595e+06	9.93372e+06	1.33231e+07	0.676633	0.363787	mouse
340	779	1.33231e+07	A	0.676633	Sorbs2;Sorbs2;Sorbs2;Sorbs2;Sorbs2;Sorbs2;Sorbs2	ArgBP2 iso1 iso 3;ArgBP2 iso1 iso 4;ArgBP2 iso5 iso 5;ArgBP2 iso1;ArgBP2 iso 2;ArgBP2 iso1 iso 6;ArgBP2 iso1 iso 7	116; 116; 124; 147; 147; 124; 147	Sorbin and SH3 domain-containing protein 2	SRBS2_MOUSE|Q3UTJ2-3;SRBS2_MOUSE|Q3UTJ2-4;SRBS2_MOUSE|Q3UTJ2-5;SRBS2_MOUSE|Q3UTJ2;SRBS2_MOUSE|Q3UTJ2-2;SRBS2_MOUSE|Q3UTJ2-6;SRBS2_MOUSE|Q3UTJ2-7	http://www.phosphosite.org/proteinAction.do?id=7157716&showAllSites=true	SLDSAETYSQHAQSLDGT*M#GSSIPLYR	3	1004.11	2	A	66.1	1.46865e+07	5.18092e+06	1.67503e+07	9.89595e+06	9.93372e+06	1.33231e+07	0.676633	0.363787	mouse
341	780	3.27945e+07	A	0.325861	Sorbs2;Sorbs2;Sorbs2;Sorbs2;Sorbs2;Sorbs2;Sorbs2	ArgBP2 iso1 iso 3;ArgBP2 iso1 iso 4;ArgBP2 iso5 iso 5;ArgBP2 iso1;ArgBP2 iso 2;ArgBP2 iso1 iso 6;ArgBP2 iso1 iso 7	51, 68; 51, 68; 59, 76; 82, 99; 82, §99; 59, 76; 82, 99	Sorbin and SH3 domain-containing protein 2	SRBS2_MOUSE|Q3UTJ2-3;SRBS2_MOUSE|Q3UTJ2-4;SRBS2_MOUSE|Q3UTJ2-5;SRBS2_MOUSE|Q3UTJ2;SRBS2_MOUSE|Q3UTJ2-2;SRBS2_MOUSE|Q3UTJ2-6;SRBS2_MOUSE|Q3UTJ2-7	http://www.phosphosite.org/proteinAction.do?id=7157716&showAllSites=true	S*PTQSQITINGNSGGAVS*PVSYYQR	3	924.407	2	A	64.98	1.23243e+07	9.2347e+06	4.0351e+07	2.52381e+07	1.07795e+07	3.27945e+07	0.202668	0.325861	mouse
342	782	1.71642e+07	A	0.146763	Sorbs2;Sorbs2;Sorbs2;Sorbs2;Sorbs2;Sorbs2;Sorbs2	ArgBP2 iso1 iso 3;ArgBP2 iso1 iso 4;ArgBP2 iso5 iso 5;ArgBP2 iso1;ArgBP2 iso 2;ArgBP2 iso1 iso 6;ArgBP2 iso1 iso 7	51; 51; 59; 82; 82; 59; 82	Sorbin and SH3 domain-containing protein 2	SRBS2_MOUSE|Q3UTJ2-3;SRBS2_MOUSE|Q3UTJ2-4;SRBS2_MOUSE|Q3UTJ2-5;SRBS2_MOUSE|Q3UTJ2;SRBS2_MOUSE|Q3UTJ2-2;SRBS2_MOUSE|Q3UTJ2-6;SRBS2_MOUSE|Q3UTJ2-7	http://www.phosphosite.org/proteinAction.do?id=7157716&showAllSites=true	S*PTQSQITINGNSGGAVSPVSYYQR	3	897.752	2	A	54.06	7.16905e+06	6.20003e+06	1.89455e+07	1.5383e+07	6.68454e+06	1.71642e+07	0.102505	0.146763	mouse
343	783	3.27945e+07	A	0.325861	Sorbs2;Sorbs2;Sorbs2;Sorbs2;Sorbs2;Sorbs2;Sorbs2	ArgBP2 iso1 iso 3;ArgBP2 iso1 iso 4;ArgBP2 iso5 iso 5;ArgBP2 iso1;ArgBP2 iso 2;ArgBP2 iso1 iso 6;ArgBP2 iso1 iso 7	53, 68; 53, 68; 61, 76; 84, 99; 84, §99; 61, 76; 84, 99	Sorbin and SH3 domain-containing protein 2	SRBS2_MOUSE|Q3UTJ2-3;SRBS2_MOUSE|Q3UTJ2-4;SRBS2_MOUSE|Q3UTJ2-5;SRBS2_MOUSE|Q3UTJ2;SRBS2_MOUSE|Q3UTJ2-2;SRBS2_MOUSE|Q3UTJ2-6;SRBS2_MOUSE|Q3UTJ2-7	http://www.phosphosite.org/proteinAction.do?id=7157716&showAllSites=true	SPT*QSQITINGNSGGAVS*PVSYYQR	3	924.407	3	A	64.98	1.23243e+07	9.2347e+06	4.0351e+07	2.52381e+07	1.07795e+07	3.27945e+07	0.202668	0.325861	mouse
344	784	1.06493e+08	A	0.0951241	Sorbs2;Sorbs2;Sorbs2;Sorbs2;Sorbs2;Sorbs2;Sorbs2	ArgBP2 iso1 iso 3;ArgBP2 iso1 iso 4;ArgBP2 iso5 iso 5;ArgBP2 iso1;ArgBP2 iso 2;ArgBP2 iso1 iso 6;ArgBP2 iso1 iso 7	53; 53; 61; 84; 84; 61; 84	Sorbin and SH3 domain-containing protein 2	SRBS2_MOUSE|Q3UTJ2-3;SRBS2_MOUSE|Q3UTJ2-4;SRBS2_MOUSE|Q3UTJ2-5;SRBS2_MOUSE|Q3UTJ2;SRBS2_MOUSE|Q3UTJ2-2;SRBS2_MOUSE|Q3UTJ2-6;SRBS2_MOUSE|Q3UTJ2-7	http://www.phosphosite.org/proteinAction.do?id=7157716&showAllSites=true	SPT*QSQITINGN	2	670.298	1	A	42.6	6.16847e+07	7.05813e+07	1.08005e+08	1.04981e+08	6.6133e+07	1.06493e+08	0.0951241	0.0200796	mouse
345	785	1.06493e+08	A	0.0951241	Sorbs2;Sorbs2;Sorbs2;Sorbs2;Sorbs2;Sorbs2;Sorbs2	ArgBP2 iso1 iso 3;ArgBP2 iso1 iso 4;ArgBP2 iso5 iso 5;ArgBP2 iso1;ArgBP2 iso 2;ArgBP2 iso1 iso 6;ArgBP2 iso1 iso 7	55; 55; 63; 86; 86; 63; 86	Sorbin and SH3 domain-containing protein 2	SRBS2_MOUSE|Q3UTJ2-3;SRBS2_MOUSE|Q3UTJ2-4;SRBS2_MOUSE|Q3UTJ2-5;SRBS2_MOUSE|Q3UTJ2;SRBS2_MOUSE|Q3UTJ2-2;SRBS2_MOUSE|Q3UTJ2-6;SRBS2_MOUSE|Q3UTJ2-7	http://www.phosphosite.org/proteinAction.do?id=7157716&showAllSites=true	SPTQS*QITINGN	2	670.298	1	A	42.6	6.16847e+07	7.05813e+07	1.08005e+08	1.04981e+08	6.6133e+07	1.06493e+08	0.0951241	0.0200796	mouse
346	786	1.71642e+07	A	0.146763	Sorbs2;Sorbs2;Sorbs2;Sorbs2;Sorbs2;Sorbs2;Sorbs2	ArgBP2 iso1 iso 3;ArgBP2 iso1 iso 4;ArgBP2 iso5 iso 5;ArgBP2 iso1;ArgBP2 iso 2;ArgBP2 iso1 iso 6;ArgBP2 iso1 iso 7	58; 58; 66; 89; 89; 66; 89	Sorbin and SH3 domain-containing protein 2	SRBS2_MOUSE|Q3UTJ2-3;SRBS2_MOUSE|Q3UTJ2-4;SRBS2_MOUSE|Q3UTJ2-5;SRBS2_MOUSE|Q3UTJ2;SRBS2_MOUSE|Q3UTJ2-2;SRBS2_MOUSE|Q3UTJ2-6;SRBS2_MOUSE|Q3UTJ2-7	http://www.phosphosite.org/proteinAction.do?id=7157716&showAllSites=true	SPTQSQIT*INGNSGGAVSPVSYYQR	3	897.752	1	A	54.06	7.16905e+06	6.20003e+06	1.89455e+07	1.5383e+07	6.68454e+06	1.71642e+07	0.102505	0.146763	mouse
347	787	3.27945e+07	A	0.325861	Sorbs2;Sorbs2;Sorbs2;Sorbs2;Sorbs2;Sorbs2;Sorbs2	ArgBP2 iso1 iso 3;ArgBP2 iso1 iso 4;ArgBP2 iso5 iso 5;ArgBP2 iso1;ArgBP2 iso 2;ArgBP2 iso1 iso 6;ArgBP2 iso1 iso 7	63, 68; 63, 68; 71, 76; 94, 99; 94, §99; 71, 76; 94, 99	Sorbin and SH3 domain-containing protein 2	SRBS2_MOUSE|Q3UTJ2-3;SRBS2_MOUSE|Q3UTJ2-4;SRBS2_MOUSE|Q3UTJ2-5;SRBS2_MOUSE|Q3UTJ2;SRBS2_MOUSE|Q3UTJ2-2;SRBS2_MOUSE|Q3UTJ2-6;SRBS2_MOUSE|Q3UTJ2-7	http://www.phosphosite.org/proteinAction.do?id=7157716&showAllSites=true	SPTQSQITINGNS*GGAVS*PVSYYQR	3	924.407	1	A	64.98	1.23243e+07	9.2347e+06	4.0351e+07	2.52381e+07	1.07795e+07	3.27945e+07	0.202668	0.325861	mouse
348	790	1.71642e+07	A	0.146763	Sorbs2;Sorbs2;Sorbs2;Sorbs2;Sorbs2;Sorbs2;Sorbs2	ArgBP2 iso1 iso 3;ArgBP2 iso1 iso 4;ArgBP2 iso5 iso 5;ArgBP2 iso1;ArgBP2 iso 2;ArgBP2 iso1 iso 6;ArgBP2 iso1 iso 7	68; 68; 76; 99; §99; 76; 99	Sorbin and SH3 domain-containing protein 2	SRBS2_MOUSE|Q3UTJ2-3;SRBS2_MOUSE|Q3UTJ2-4;SRBS2_MOUSE|Q3UTJ2-5;SRBS2_MOUSE|Q3UTJ2;SRBS2_MOUSE|Q3UTJ2-2;SRBS2_MOUSE|Q3UTJ2-6;SRBS2_MOUSE|Q3UTJ2-7	http://www.phosphosite.org/proteinAction.do?id=7157716&showAllSites=true	SPTQSQITINGNSGGAVS*PVSYYQR	3	897.752	8	A	54.06	7.16905e+06	6.20003e+06	1.89455e+07	1.5383e+07	6.68454e+06	1.71642e+07	0.102505	0.146763	mouse
349	791	1.4586e+08	A	0.23766	Sorbs2;Sorbs2;Sorbs2;Sorbs2;Sorbs2;Sorbs2;Sorbs2	ArgBP2 iso1 iso 3;ArgBP2 iso1 iso 4;ArgBP2 iso5 iso 5;ArgBP2 iso1;ArgBP2 iso 2;ArgBP2 iso1 iso 6;ArgBP2 iso1 iso 7	78; 78; 86; 109; §109; 86; 109	Sorbin and SH3 domain-containing protein 2	SRBS2_MOUSE|Q3UTJ2-3;SRBS2_MOUSE|Q3UTJ2-4;SRBS2_MOUSE|Q3UTJ2-5;SRBS2_MOUSE|Q3UTJ2;SRBS2_MOUSE|Q3UTJ2-2;SRBS2_MOUSE|Q3UTJ2-6;SRBS2_MOUSE|Q3UTJ2-7	http://www.phosphosite.org/proteinAction.do?id=7157716&showAllSites=true	PFS*PSAYSLPASLNSSIIMQHGR	3	847.405	3	A	88.5133	7.26176e+07	1.01955e+08	1.55712e+08	1.36007e+08	8.72861e+07	1.4586e+08	0.23766	0.0955241	mouse
350	793	3.86607e+06	A	0.221617	Sorbs2;Sorbs2;Sorbs2;Sorbs2;Sorbs2;Sorbs2;Sorbs2	ArgBP2 iso1 iso 3;ArgBP2 iso1 iso 4;ArgBP2 iso5 iso 5;ArgBP2 iso1;ArgBP2 iso 2;ArgBP2 iso1 iso 6;ArgBP2 iso1 iso 7	99; 99; 107; 130; §130; 107; 130	Sorbin and SH3 domain-containing protein 2	SRBS2_MOUSE|Q3UTJ2-3;SRBS2_MOUSE|Q3UTJ2-4;SRBS2_MOUSE|Q3UTJ2-5;SRBS2_MOUSE|Q3UTJ2;SRBS2_MOUSE|Q3UTJ2-2;SRBS2_MOUSE|Q3UTJ2-6;SRBS2_MOUSE|Q3UTJ2-7	http://www.phosphosite.org/proteinAction.do?id=7157716&showAllSites=true	S*LDSAETYSQHAQ	2	758.801	1	A	37.05	1.54241e+06	2.11565e+06	4.30496e+06	3.42717e+06	1.82903e+06	3.86607e+06	0.221617	0.160548	mouse
351	795	4.40759e+07	A	0.477736	Sorbs3	vinexin	§389	Vinexin	VINEX_MOUSE|Q9R1Z8	http://www.phosphosite.org/proteinAction.do?id=6063&showAllSites=true	LSSAWRPNS*PHAPYFSSSR	4	557.508	6	A	53.125	2.13454e+07	2.37018e+07	5.89652e+07	2.91866e+07	2.25236e+07	4.40759e+07	0.0739767	0.477736	mouse
352	796	3.06743e+08	A	0.251684	Sorbs3	vinexin	§389, §402	Vinexin	VINEX_MOUSE|Q9R1Z8	http://www.phosphosite.org/proteinAction.do?id=6063&showAllSites=true	LSSAWRPNS*PHAPYFSSSRPLS*PHR	4	749.345	4	A	53.705	1.87354e+08	1.73627e+08	3.61333e+08	2.52153e+08	1.8049e+08	3.06743e+08	0.0537756	0.251684	mouse
353	797	2.36824e+07	A	0.24662	Sorbs3	vinexin	§402	Vinexin	VINEX_MOUSE|Q9R1Z8	http://www.phosphosite.org/proteinAction.do?id=6063&showAllSites=true	LSSAWRPNSPHAPYFSSSRPLS*PHR	4	729.353	1	A	49.68	1.33339e+07	1.4676e+07	2.78123e+07	1.95525e+07	1.40049e+07	2.36824e+07	0.0677602	0.24662	mouse
354	801	2.65561e+08	A	0.186263	Sorbs3	vinexin	§412	Vinexin	VINEX_MOUSE|Q9R1Z8	http://www.phosphosite.org/proteinAction.do?id=6063&showAllSites=true	MADGGGS*PFLGR	2	622.76	13	A	48.22	1.49768e+08	1.74443e+08	3.00538e+08	2.30585e+08	1.62105e+08	2.65561e+08	0.107635	0.186263	mouse
355	802	1.39993e+07	A	0.0918067	Sorbs3	vinexin	§594	Vinexin	VINEX_MOUSE|Q9R1Z8	http://www.phosphosite.org/proteinAction.do?id=6063&showAllSites=true	LCDDGPQLPAS*PNPTTTAHLSSHSHPSSIPVDPTDWGGR	4	1046.97	2	A	65.215	1.30905e+07	1.49081e+07	7.8019e+06	7.71482e+06	1.39993e+07	7.75836e+06	0.0918067	0.00793697	mouse
356	805	9.56223e+06	A	0.257562	Sorbs3	vinexin	§668	Vinexin	VINEX_MOUSE|Q9R1Z8	http://www.phosphosite.org/proteinAction.do?id=6063&showAllSites=true	PINLGPS*SPNTEIHWTPYR	3	753.691	5	A	72.4433	1.06065e+07	8.51795e+06	5.52758e+06	3.82437e+06	9.56223e+06	4.67597e+06	0.154445	0.257562	mouse
357	806	9.56223e+06	A	0.257562	Sorbs3	vinexin	§669	Vinexin	VINEX_MOUSE|Q9R1Z8	http://www.phosphosite.org/proteinAction.do?id=6063&showAllSites=true	PINLGPSS*PNTEIHWTPYR	3	753.691	1	A	72.4433	1.06065e+07	8.51795e+06	5.52758e+06	3.82437e+06	9.56223e+06	4.67597e+06	0.154445	0.257562	mouse
358	807	1.51425e+07	A	0.183374	Ston2	STON2	§279	Stonin-2	STON2_MOUSE|Q8BZ60	http://www.phosphosite.org/proteinAction.do?id=17143&showAllSites=true	ST*LMNLPK	2	492.235	3	A	56.43	1.00355e+07	9.80295e+06	1.71059e+07	1.3179e+07	9.91921e+06	1.51425e+07	0.0165757	0.183374	mouse
359	808	1.38049e+07	A	0.101575	Ston2	STON2	267	Stonin-2	STON2_MOUSE|Q8BZ60	http://www.phosphosite.org/proteinAction.do?id=17143&showAllSites=true	KPNTPSAATAAPDVPFNS*TGSFKR	3	847.743	1	A	50.25	1.00824e+07	1.16428e+07	1.41056e+07	1.35043e+07	1.08626e+07	1.38049e+07	0.101575	0.0307961	mouse
360	809	1.38049e+07	A	0.101575	Ston2	STON2	268	Stonin-2	STON2_MOUSE|Q8BZ60	http://www.phosphosite.org/proteinAction.do?id=17143&showAllSites=true	KPNTPSAATAAPDVPFNST*GSFKR	3	847.743	1	A	50.25	1.00824e+07	1.16428e+07	1.41056e+07	1.35043e+07	1.08626e+07	1.38049e+07	0.101575	0.0307961	mouse
361	810	1.51425e+07	A	0.183374	Ston2	STON2	278	Stonin-2	STON2_MOUSE|Q8BZ60	http://www.phosphosite.org/proteinAction.do?id=17143&showAllSites=true	S*TLMNLPK	2	492.235	1	A	56.43	1.00355e+07	9.80295e+06	1.71059e+07	1.3179e+07	9.91921e+06	1.51425e+07	0.0165757	0.183374	mouse
362	811	1.16799e+07	A	0.0453513	Sufu;Sufu;Sufu;Sufu	SUFU;SUFU iso 2;SUFU iso 3;SUFU iso 4	§346; 302; 347; 347	Suppressor of fused homolog	SUFU_MOUSE|Q9Z0P7;SUFU_MOUSE|Q9Z0P7-2;SUFU_MOUSE|Q9Z0P7-3;SUFU_MOUSE|Q9Z0P7-4	http://www.phosphosite.org/proteinAction.do?id=13058&showAllSites=true	KDS*LGSDSSTAIIPHELIR	3	707.019	2	A	63.87	1.06488e+07	1.13544e+07	1.18616e+07	1.14982e+07	1.10016e+07	1.16799e+07	0.0453513	0.021999	mouse
363	812	1.16799e+07	A	0.0453513	Sufu;Sufu;Sufu;Sufu	SUFU;SUFU iso 2;SUFU iso 3;SUFU iso 4	§351; 307; §352; §352	Suppressor of fused homolog	SUFU_MOUSE|Q9Z0P7;SUFU_MOUSE|Q9Z0P7-2;SUFU_MOUSE|Q9Z0P7-3;SUFU_MOUSE|Q9Z0P7-4	http://www.phosphosite.org/proteinAction.do?id=13058&showAllSites=true	KDSLGSDS*STAIIPHELIR	3	707.019	1	A	63.87	1.06488e+07	1.13544e+07	1.18616e+07	1.14982e+07	1.10016e+07	1.16799e+07	0.0453513	0.021999	mouse
364	813	6.79736e+06	A	0.259397	Syne2	SYNE2	§4096	Nesprin-2	SYNE2_MOUSE|Q6ZWQ0	http://www.phosphosite.org/proteinAction.do?id=11316&showAllSites=true	TNS*MSFLPVVK	2	651.812	3	A	80.43	4.91378e+06	7.12126e+06	7.61434e+06	5.98038e+06	6.01752e+06	6.79736e+06	0.259397	0.169976	mouse
365	814	9.05152e+06	A	0.188832	Synrg;Synrg	synergin, gamma;synergin, gamma iso2 iso 2	§1077; 921	Synergin gamma	SYNRG_MOUSE|Q5SV85;SYNRG_MOUSE|Q5SV85-2	http://www.phosphosite.org/proteinAction.do?id=9911&showAllSites=true	SS*PSPALEQPFR	2	698.319	1	A	56.0067	6.27454e+06	8.20836e+06	9.01294e+06	9.09011e+06	7.24145e+06	9.05152e+06	0.188832	0.00602847	mouse
366	815	9.05152e+06	A	0.188832	Synrg;Synrg	synergin, gamma;synergin, gamma iso2 iso 2	§1079; 923	Synergin gamma	SYNRG_MOUSE|Q5SV85;SYNRG_MOUSE|Q5SV85-2	http://www.phosphosite.org/proteinAction.do?id=9911&showAllSites=true	SSPS*PALEQPFR	2	698.319	3	A	56.0067	6.27454e+06	8.20836e+06	9.01294e+06	9.09011e+06	7.24145e+06	9.05152e+06	0.188832	0.00602847	mouse
367	816	1.43799e+07	A	0.177078	Synrg;Synrg;Alox5	synergin, gamma;synergin, gamma iso2 iso 2;5-LO	§1092; 936; §218	Synergin gamma	SYNRG_MOUSE|Q5SV85;SYNRG_MOUSE|Q5SV85-2;LOX5_MOUSE|P48999	http://www.phosphosite.org/proteinAction.do?id=9911&showAllSites=true	SNT*ISER	2	443.687	1	A	18.64	1.33671e+07	1.53927e+07	1.09757e+07	8.533e+06	1.43799e+07	9.75437e+06	0.0996088	0.177078	mouse
368	818	1.5093e+08	A	0.500841	Tns3	tensin 3	§332	Tensin-3	TENS3_MOUSE|Q5SSZ5	http://www.phosphosite.org/proteinAction.do?id=10323&showAllSites=true	WDS*YENM#SADGEVLHTQGPVDGSLYAK	3	1022.43	8	A	67.13	2.04382e+08	9.74786e+07	1.38699e+08	7.71645e+07	1.5093e+08	1.07932e+08	0.500841	0.403139	mouse
369	824	1.6712e+08	A	0.250123	Tns3	tensin 3	§333	Tensin-3	TENS3_MOUSE|Q5SSZ5	http://www.phosphosite.org/proteinAction.do?id=10323&showAllSites=true	WDSY*ENMSADGEVLHTQGPVDGSLYAK	3	1017.1	11	A	70.7525	1.36291e+08	1.94859e+08	1.88739e+08	1.45501e+08	1.65575e+08	1.6712e+08	0.250123	0.182944	mouse
370	826	7.33302e+07	A	0.154526	Tns3	tensin 3	§571	Tensin-3	TENS3_MOUSE|Q5SSZ5	http://www.phosphosite.org/proteinAction.do?id=10323&showAllSites=true	KPS*APTPVQAYGQSNYSTQTWVR	3	882.75	2	A	60.89	7.50536e+07	7.16067e+07	7.9128e+07	6.35393e+07	7.33302e+07	7.13336e+07	0.0332369	0.154526	mouse
371	828	7.33302e+07	A	0.154526	Tns3	tensin 3	§574	Tensin-3	TENS3_MOUSE|Q5SSZ5	http://www.phosphosite.org/proteinAction.do?id=10323&showAllSites=true	KPSAPT*PVQAYGQSNYSTQTWVR	3	882.75	6	A	60.89	7.50536e+07	7.16067e+07	7.9128e+07	6.35393e+07	7.33302e+07	7.13336e+07	0.0332369	0.154526	mouse
372	829	4.83832e+07	A	0.100818	Tns3	tensin 3	§745	Tensin-3	TENS3_MOUSE|Q5SSZ5	http://www.phosphosite.org/proteinAction.do?id=10323&showAllSites=true	LDS*VDGPGR	2	498.213	2	A	24.155	4.49341e+07	5.18324e+07	3.03223e+07	3.27726e+07	4.83832e+07	3.15475e+07	0.100818	0.0549228	mouse
373	831	4.38801e+07	A	0.289244	Tns3	tensin 3	§752	Tensin-3	TENS3_MOUSE|Q5SSZ5	http://www.phosphosite.org/proteinAction.do?id=10323&showAllSites=true	LDSVDGPGRS*PGR	3	464.88	6	A	22.615	3.19656e+07	4.84031e+07	4.78151e+07	3.99451e+07	4.01843e+07	4.38801e+07	0.289244	0.126821	mouse
374	834	1.05754e+08	A	0.21277	Tns3	tensin 3	§769	Tensin-3	TENS3_MOUSE|Q5SSZ5	http://www.phosphosite.org/proteinAction.do?id=10323&showAllSites=true	KLS*IGQYDNDAASQVTFSK	3	718.004	8	A	63.025	1.143e+08	9.72085e+07	9.98982e+07	7.37697e+07	1.05754e+08	8.68339e+07	0.114281	0.21277	mouse
375	841	5.02118e+07	A	0.186196	Tns3	tensin 3	§844	Tensin-3	TENS3_MOUSE|Q5SSZ5	http://www.phosphosite.org/proteinAction.do?id=10323&showAllSites=true	ESSMCLTPSFPVS*PETPYVK	3	779.346	22	A	81.0225	3.66441e+07	4.77563e+07	5.032e+07	5.01036e+07	4.22002e+07	5.02118e+07	0.186196	0.00304839	mouse
376	842	1.5093e+08	A	0.500841	Tns3	tensin 3	337	Tensin-3	TENS3_MOUSE|Q5SSZ5	http://www.phosphosite.org/proteinAction.do?id=10323&showAllSites=true	WDSYENM#S*ADGEVLHTQGPVDGSLYAK	3	1022.43	1	A	67.13	2.04382e+08	9.74786e+07	1.38699e+08	7.71645e+07	1.5093e+08	1.07932e+08	0.500841	0.403139	mouse
377	843	1.61281e+08	A	0.190659	Ubxn1	UBXN1	§182	UBX domain-containing protein 1	UBXN1_MOUSE|Q922Y1	http://www.phosphosite.org/proteinAction.do?id=11115&showAllSites=true	YGGS*VGSR	2	431.676	3	A	23.1667	1.22424e+08	1.10302e+08	1.83024e+08	1.39538e+08	1.16363e+08	1.61281e+08	0.0736621	0.190659	mouse
378	844	2.47056e+07	A	0.117616	Vangl1	VANGL1	§340	Vang-like protein 1	VANG1_MOUSE|Q80Z96	http://www.phosphosite.org/proteinAction.do?id=10386&showAllSites=true	RRDS*SHNELYYEEAEHER	4	600.755	2	A	30.205	1.82724e+07	2.15874e+07	2.49627e+07	2.44486e+07	1.99299e+07	2.47056e+07	0.117616	0.0147153	mouse
379	845	2.47056e+07	A	0.117616	Vangl1	VANGL1	§341	Vang-like protein 1	VANG1_MOUSE|Q80Z96	http://www.phosphosite.org/proteinAction.do?id=10386&showAllSites=true	RRDSS*HNELYYEEAEHER	4	600.755	1	A	30.205	1.82724e+07	2.15874e+07	2.49627e+07	2.44486e+07	1.99299e+07	2.47056e+07	0.117616	0.0147153	mouse
380	Adhesion or extracellular matrix protein
381	849	1.71758e+08	A	0.197711	Arfgap1;Arfgap1	ARF GAP1;ARF GAP 3 iso 2	§342; 320	ADP-ribosylation factor GTPase-activating protein 1	ARFG1_MOUSE|Q9EPJ9;ARFG1_MOUSE|Q9EPJ9-2	http://www.phosphosite.org/proteinAction.do?id=11136&showAllSites=true	AKS*PSSDSWTCADASTGR	3	655.267	13	A	37.045	1.47746e+08	1.9577e+08	1.47883e+08	1.51287e+08	1.71758e+08	1.49585e+08	0.197711	0.0160895	mouse
382	851	8.73415e+06	A	0.363303	Arfgap1;Arfgap1	ARF GAP1;ARF GAP 3 iso 2	§344, §347; 322, 325	ADP-ribosylation factor GTPase-activating protein 1	ARFG1_MOUSE|Q9EPJ9;ARFG1_MOUSE|Q9EPJ9-2	http://www.phosphosite.org/proteinAction.do?id=11136&showAllSites=true	AKSPS*SDS*WTCADASTGR	3	681.922	1	A	38.27	7.57919e+06	9.88912e+06	8.45985e+06	5.00166e+06	8.73415e+06	6.73076e+06	0.187008	0.363303	mouse
383	852	2.21609e+08	A	0.158414	Arfgap1;Arfgap1	ARF GAP1;ARF GAP 3 iso 2	§359; 337	ADP-ribosylation factor GTPase-activating protein 1	ARFG1_MOUSE|Q9EPJ9;ARFG1_MOUSE|Q9EPJ9-2	http://www.phosphosite.org/proteinAction.do?id=11136&showAllSites=true	S*SDSWDVWGSGSASNNK	2	932.363	2	A	62.9575	2.17292e+08	2.25926e+08	2.37326e+08	1.89513e+08	2.21609e+08	2.1342e+08	0.0275486	0.158414	mouse
384	857	2.21609e+08	A	0.158414	Arfgap1;Arfgap1	ARF GAP1;ARF GAP 3 iso 2	§360; 338	ADP-ribosylation factor GTPase-activating protein 1	ARFG1_MOUSE|Q9EPJ9;ARFG1_MOUSE|Q9EPJ9-2	http://www.phosphosite.org/proteinAction.do?id=11136&showAllSites=true	SS*DSWDVWGSGSASNNK	2	932.363	9	A	62.9575	2.17292e+08	2.25926e+08	2.37326e+08	1.89513e+08	2.21609e+08	2.1342e+08	0.0275486	0.158414	mouse
385	860	2.21609e+08	A	0.158414	Arfgap1;Arfgap1	ARF GAP1;ARF GAP 3 iso 2	§362; 340	ADP-ribosylation factor GTPase-activating protein 1	ARFG1_MOUSE|Q9EPJ9;ARFG1_MOUSE|Q9EPJ9-2	http://www.phosphosite.org/proteinAction.do?id=11136&showAllSites=true	SSDS*WDVWGSGSASNNK	2	932.363	12	A	62.9575	2.17292e+08	2.25926e+08	2.37326e+08	1.89513e+08	2.21609e+08	2.1342e+08	0.0275486	0.158414	mouse
386	862	7.80643e+07	A	0.164764	Arhgap24;Arhgap24;Arhgap24	ARHGAP24;ARHGAP24 iso 2;ARHGAP24 iso 3	§368; 277; 275	Rho GTPase-activating protein 24	RHG24_MOUSE|Q8C4V1;RHG24_MOUSE|Q8C4V1-2;RHG24_MOUSE|Q8C4V1-3	http://www.phosphosite.org/proteinAction.do?id=20691&showAllSites=true	ENNNTKES*PVR	2	684.301	11	A	12.825	7.00957e+07	7.78004e+07	6.89694e+07	8.71592e+07	7.3948e+07	7.80643e+07	0.0736742	0.164764	mouse
387	872	1.56793e+09	A	0.198575	Arhgap24;Arhgap24;Arhgap24	ARHGAP24;ARHGAP24 iso 2;ARHGAP24 iso 3	§374, §380; 283, 289; 281, 287	Rho GTPase-activating protein 24	RHG24_MOUSE|Q8C4V1;RHG24_MOUSE|Q8C4V1-2;RHG24_MOUSE|Q8C4V1-3	http://www.phosphosite.org/proteinAction.do?id=20691&showAllSites=true	RCS*WDKPES*PQR	3	569.223	21	A	29.535	1.01718e+09	1.29177e+09	1.78809e+09	1.34777e+09	1.15448e+09	1.56793e+09	0.168189	0.198575	mouse
388	873	5.79721e+07	A	0.2372	Arhgap24;Arhgap24;Arhgap24	ARHGAP24;ARHGAP24 iso 2;ARHGAP24 iso 3	§374; 283; 281	Rho GTPase-activating protein 24	RHG24_MOUSE|Q8C4V1;RHG24_MOUSE|Q8C4V1-2;RHG24_MOUSE|Q8C4V1-3	http://www.phosphosite.org/proteinAction.do?id=20691&showAllSites=true	RCS*WDKPESPQR	3	542.568	4	A	24.945	3.424e+07	4.80406e+07	6.45517e+07	5.13925e+07	4.11403e+07	5.79721e+07	0.2372	0.160507	mouse
389	878	1.37746e+09	A	0.0874931	Arhgap24;Arhgap24;Arhgap24	ARHGAP24;ARHGAP24 iso 2;ARHGAP24 iso 3	§390, §395; 299, 304; 297, 302	Rho GTPase-activating protein 24	RHG24_MOUSE|Q8C4V1;RHG24_MOUSE|Q8C4V1-2;RHG24_MOUSE|Q8C4V1-3	http://www.phosphosite.org/proteinAction.do?id=20691&showAllSites=true	SSVDNGS*PTALS*GSK	2	783.808	10	A	29.61	8.5917e+08	8.769e+08	1.46268e+09	1.29224e+09	8.68035e+08	1.37746e+09	0.0144437	0.0874931	mouse
390	882	1.37746e+09	A	0.0874931	Arhgap24;Arhgap24;Arhgap24	ARHGAP24;ARHGAP24 iso 2;ARHGAP24 iso 3	§390, §397; 299, 306; 297, 304	Rho GTPase-activating protein 24	RHG24_MOUSE|Q8C4V1;RHG24_MOUSE|Q8C4V1-2;RHG24_MOUSE|Q8C4V1-3	http://www.phosphosite.org/proteinAction.do?id=20691&showAllSites=true	SSVDNGS*PTALSGS*K	2	783.808	9	A	29.61	8.5917e+08	8.769e+08	1.46268e+09	1.29224e+09	8.68035e+08	1.37746e+09	0.0144437	0.0874931	mouse
391	886	7.27118e+08	A	0.0284244	Arhgap24;Arhgap24;Arhgap24	ARHGAP24;ARHGAP24 iso 2;ARHGAP24 iso 3	§390; 299; 297	Rho GTPase-activating protein 24	RHG24_MOUSE|Q8C4V1;RHG24_MOUSE|Q8C4V1-2;RHG24_MOUSE|Q8C4V1-3	http://www.phosphosite.org/proteinAction.do?id=20691&showAllSites=true	SSVDNGS*PTALSGSK	2	743.825	12	A	29.5625	5.65266e+08	5.88454e+08	7.3105e+08	7.23185e+08	5.7686e+08	7.27118e+08	0.0284244	0.00764827	mouse
392	888	2.64047e+07	A	0.140212	Arhgef12	ARHGEF12	§608	Rho guanine nucleotide exchange factor 12	ARHGC_MOUSE|Q8R4H2	http://www.phosphosite.org/proteinAction.do?id=6616&showAllSites=true	RPS*RHDNSAIGR	4	362.174	8	A	12.81	2.02673e+07	1.71846e+07	2.90226e+07	2.37868e+07	1.8726e+07	2.64047e+07	0.116404	0.140212	mouse
393	889	8.44363e+06	A	0.115266	Arhgef18;Arhgef18	ARHGEF18;ARHGEF18 iso 2	§568; §568	Rho guanine nucleotide exchange factor 18	ARHGI_MOUSE|Q6P9R4;ARHGI_MOUSE|Q6P9R4-2	http://www.phosphosite.org/proteinAction.do?id=13378&showAllSites=true	RAET*FGGYDSVGSPSK	3	579.921	2	A	40.96	7.78404e+06	6.78045e+06	7.75542e+06	9.13183e+06	7.28224e+06	8.44363e+06	0.0974486	0.115266	mouse
394	890	8.44363e+06	A	0.115266	Arhgef18;Arhgef18	ARHGEF18;ARHGEF18 iso 2	§572; §572	Rho guanine nucleotide exchange factor 18	ARHGI_MOUSE|Q6P9R4;ARHGI_MOUSE|Q6P9R4-2	http://www.phosphosite.org/proteinAction.do?id=13378&showAllSites=true	RAETFGGY*DSVGSPSK	3	579.921	1	A	40.96	7.78404e+06	6.78045e+06	7.75542e+06	9.13183e+06	7.28224e+06	8.44363e+06	0.0974486	0.115266	mouse
395	892	4.10328e+08	A	0.13671	Arhgef2;Arhgef2;Arhgef2	ARHGEF2;ARHGEF2 iso 4;ARHGEF2 iso 5	§646; 619; 617	Rho guanine nucleotide exchange factor 2	ARHG2_MOUSE|Q60875;ARHG2_MOUSE|Q60875-4;ARHG2_MOUSE|Q60875-5	http://www.phosphosite.org/proteinAction.do?id=5030&showAllSites=true	LES*FESLR	2	530.739	10	A	57.5975	3.04405e+08	3.41505e+08	4.49994e+08	3.70662e+08	3.22955e+08	4.10328e+08	0.0812297	0.13671	mouse
396	894	1.32938e+07	A	0.225278	Arhgef2;Arhgef2;Arhgef2	ARHGEF2;ARHGEF2 iso 4;ARHGEF2 iso 5	§811; 784; 782	Rho guanine nucleotide exchange factor 2	ARHG2_MOUSE|Q60875;ARHG2_MOUSE|Q60875-4;ARHG2_MOUSE|Q60875-5	http://www.phosphosite.org/proteinAction.do?id=5030&showAllSites=true	QHT*LLQEELRR	3	501.587	1	A	40.28	8.9938e+06	1.24021e+07	1.51823e+07	1.14054e+07	1.06979e+07	1.32938e+07	0.225278	0.200896	mouse
397	895	2.39497e+07	A	0.172109	Arhgef2;Arhgef2;Arhgef2;Arhgef2;Arhgef2	ARHGEF2;ARHGEF2 iso 4;ARHGEF2 iso 5;ARHGEF2 iso 2;ARHGEF2 iso 3	§103; 76; 76; §103; 95	Rho guanine nucleotide exchange factor 2	ARHG2_MOUSE|Q60875;ARHG2_MOUSE|Q60875-4;ARHG2_MOUSE|Q60875-5;ARHG2_MOUSE|Q60875-2;ARHG2_MOUSE|Q60875-3	http://www.phosphosite.org/proteinAction.do?id=5030&showAllSites=true	NNT*ALQSVSLR	2	641.811	4	A	50.6875	1.86361e+07	2.38007e+07	2.36366e+07	2.42628e+07	2.12184e+07	2.39497e+07	0.172109	0.0184884	mouse
398	898	2.6517e+08	A	0.242181	Arhgef2;Arhgef2;Arhgef2;Arhgef2;Arhgef2	ARHGEF2;ARHGEF2 iso 4;ARHGEF2 iso 5;ARHGEF2 iso 2;ARHGEF2 iso 3	§121; 94; 92; §121; 113	Rho guanine nucleotide exchange factor 2	ARHG2_MOUSE|Q60875;ARHG2_MOUSE|Q60875-4;ARHG2_MOUSE|Q60875-5;ARHG2_MOUSE|Q60875-2;ARHG2_MOUSE|Q60875-3	http://www.phosphosite.org/proteinAction.do?id=5030&showAllSites=true	ERPT*SAIYPSDSFR	3	569.258	7	A	53.7225	1.76619e+08	2.03547e+08	3.1058e+08	2.1976e+08	1.90083e+08	2.6517e+08	0.10017	0.242181	mouse
399	901	2.6517e+08	A	0.242181	Arhgef2;Arhgef2;Arhgef2;Arhgef2;Arhgef2	ARHGEF2;ARHGEF2 iso 4;ARHGEF2 iso 5;ARHGEF2 iso 2;ARHGEF2 iso 3	§122; 95; 93; §122; §114	Rho guanine nucleotide exchange factor 2	ARHG2_MOUSE|Q60875;ARHG2_MOUSE|Q60875-4;ARHG2_MOUSE|Q60875-5;ARHG2_MOUSE|Q60875-2;ARHG2_MOUSE|Q60875-3	http://www.phosphosite.org/proteinAction.do?id=5030&showAllSites=true	ERPTS*AIYPSDSFR	3	569.258	8	A	53.7225	1.76619e+08	2.03547e+08	3.1058e+08	2.1976e+08	1.90083e+08	2.6517e+08	0.10017	0.242181	mouse
400	903	1.26529e+08	A	0.185021	Arhgef2;Arhgef2;Arhgef2;Arhgef2;Arhgef2	ARHGEF2;ARHGEF2 iso 4;ARHGEF2 iso 5;ARHGEF2 iso 2;ARHGEF2 iso 3	§142; 115; 113; §142; 134	Rho guanine nucleotide exchange factor 2	ARHG2_MOUSE|Q60875;ARHG2_MOUSE|Q60875-4;ARHG2_MOUSE|Q60875-5;ARHG2_MOUSE|Q60875-2;ARHG2_MOUSE|Q60875-3	http://www.phosphosite.org/proteinAction.do?id=5030&showAllSites=true	RGLS*SLSLAK	2	556.297	8	A	59.9375	9.51465e+07	1.01759e+08	1.43083e+08	1.09975e+08	9.84526e+07	1.26529e+08	0.0474895	0.185021	mouse
401	904	1.84668e+07	A	0.0231933	Arhgef6	ARHGEF6	§639	Rho guanine nucleotide exchange factor 6	ARHG6_MOUSE|Q8K4I3	http://www.phosphosite.org/proteinAction.do?id=9864&showAllSites=true	KAS*EEEYVIR	2	652.3	2	A	37.29	1.32027e+07	1.36429e+07	1.83039e+07	1.86298e+07	1.34228e+07	1.84668e+07	0.0231933	0.0124762	mouse
402	906	4.17113e+07	A	0.121463	Arhgef7;Arhgef7;Arhgef7;Arhgef7;Arhgef7;Arhgef7;Arhgef7;Arhgef7	ARHGEF7;ARHGEF7 iso2 iso 2;ARHGEF7 iso3 iso 3;ARHGEF7 iso2 iso 4;ARHGEF7 iso2 iso 5;ARHGEF7 iso2 iso 6;ARHGEF7 iso2 iso 7;ARHGEF7 iso2 iso 8	§673; 673; 598; 621; 673; 621; 621; 516	Rho guanine nucleotide exchange factor 7	ARHG7_MOUSE|Q9ES28;ARHG7_MOUSE|Q9ES28-2;ARHG7_MOUSE|Q9ES28-3;ARHG7_MOUSE|Q9ES28-4;ARHG7_MOUSE|Q9ES28-5;ARHG7_MOUSE|Q9ES28-6;ARHG7_MOUSE|Q9ES28-7;ARHG7_MOUSE|Q9ES28-8	http://www.phosphosite.org/proteinAction.do?id=6574&showAllSites=true	KPS*DEEFAVR	2	629.279	6	A	35.07	3.70584e+07	4.22375e+07	3.81289e+07	4.52938e+07	3.9648e+07	4.17113e+07	0.0923682	0.121463	mouse
403	907	2.85515e+06	A	0.103647	Asap3	DDEFL1	§286	Arf-GAP with SH3 domain, ANK repeat and PH domain-containing protein 3	ASAP3_MOUSE|Q5U464	http://www.phosphosite.org/proteinAction.do?id=12790&showAllSites=true	KNS*GGGYSIHQHQGNK	3	597.936	2	A	14.12	2.6459e+06	3.0644e+06	2.70869e+06	2.91746e+06	2.85515e+06	2.81307e+06	0.103647	0.0524763	mouse
404	909	1.63505e+08	A	0.207708	Baiap2;Baiap2;Baiap2;Baiap2	IRSp53;IRSp53 iso2 iso 2;IRSp53 iso2 iso 3;IRSp53 iso2 iso 4	§367; §367; §367; 327	Brain-specific angiogenesis inhibitor 1-associated protein 2	BAIP2_MOUSE|Q8BKX1;BAIP2_MOUSE|Q8BKX1-2;BAIP2_MOUSE|Q8BKX1-3;BAIP2_MOUSE|Q8BKX1-4	http://www.phosphosite.org/proteinAction.do?id=4416&showAllSites=true	SSS*MAAGLER	2	544.726	8	A	29.505	1.16858e+08	1.3382e+08	1.87519e+08	1.39491e+08	1.25339e+08	1.63505e+08	0.0956887	0.207708	mouse
405	910	2.18858e+07	A	0.115081	Capg	CAPG	259	Macrophage-capping protein	CAPG_MOUSE|P24452	http://www.phosphosite.org/proteinAction.do?id=4846932&showAllSites=true	VS*DATGQM#NLTK	2	680.794	1	A	33.09	2.36667e+07	2.01048e+07	1.56564e+07	1.6128e+07	2.18858e+07	1.58922e+07	0.115081	0.0209819	mouse
406	912	4.06304e+07	A	0.147635	Col5a1	COL5A1	§68	Collagen alpha-1(V) chain	CO5A1_MOUSE|O88207	http://www.phosphosite.org/proteinAction.do?id=20230&showAllSites=true	RSS*SEPDVAYR	2	673.79	2	A	26.49	3.63888e+07	4.48719e+07	2.45901e+07	2.5967e+07	4.06304e+07	2.52786e+07	0.147635	0.038514	mouse
407	913	8.09756e+06	A	0.303536	Col5a1	COL5A1	69	Collagen alpha-1(V) chain	CO5A1_MOUSE|O88207	http://www.phosphosite.org/proteinAction.do?id=20230&showAllSites=true	RSSS*EPDVAYR	3	449.529	1	A	25.79	4.31982e+06	6.39947e+06	9.83556e+06	6.35956e+06	5.35964e+06	8.09756e+06	0.274372	0.303536	mouse
408	915	7.31028e+07	A	0.177909	Dbnl;Dbnl;Dbnl	DBNL;DBNL iso 2;DBNL iso 3	§277; 274; 273	Drebrin-like protein	DBNL_MOUSE|Q62418;DBNL_MOUSE|Q62418-2;DBNL_MOUSE|Q62418-3	http://www.phosphosite.org/proteinAction.do?id=2802&showAllSites=true	AMS*TTSVTSSQPGK	2	731.318	3	A	29.1533	6.39064e+07	8.22992e+07	7.98268e+07	6.25799e+07	7.31028e+07	7.12034e+07	0.177909	0.171276	mouse
409	916	5.63517e+06	A	0.599599	Dbnl;Dbnl;Dbnl	DBNL;DBNL iso 2;DBNL iso 3	§278; 275; 274	Drebrin-like protein	DBNL_MOUSE|Q62418;DBNL_MOUSE|Q62418-2;DBNL_MOUSE|Q62418-3	http://www.phosphosite.org/proteinAction.do?id=2802&showAllSites=true	AM#ST*TSVTSSQPGK	2	739.316	2	A	20.295	2.20617e+06	5.45388e+06	4.77056e+06	6.49977e+06	3.83003e+06	5.63517e+06	0.599599	0.216983	mouse
410	918	8.39101e+07	A	0.216075	Dock4	DOCK4	§1733	Dedicator of cytokinesis protein 4	DOCK4_MOUSE|P59764	http://www.phosphosite.org/proteinAction.do?id=8423&showAllSites=true	DRPCS*AIYPTPVEPSQR	3	684.979	4	A	49.76	7.42384e+07	7.32466e+07	9.67306e+07	7.10897e+07	7.37425e+07	8.39101e+07	0.00950931	0.216075	mouse
411	920	1.03447e+08	A	0.105056	Dock5	DOCK5	§1832	Dedicator of cytokinesis protein 5	DOCK5_MOUSE|B2RY04	http://www.phosphosite.org/proteinAction.do?id=23642&showAllSites=true	SKPYESSQRNS*AEIAPPLPVR	3	802.732	3	A	48.835	1.05922e+08	1.00971e+08	7.77581e+07	6.70044e+07	1.03447e+08	7.23812e+07	0.0338424	0.105056	mouse
412	921	1.11073e+07	A	0.0572921	Dock5	DOCK5	1671	Dedicator of cytokinesis protein 5	DOCK5_MOUSE|B2RY04	http://www.phosphosite.org/proteinAction.do?id=23642&showAllSites=true	RLS*VTSVASSVISTSSNSSDNASSR	3	860.403	1	A	68.54	10760972	11453659	2154071	2335970	1.11073e+07	2.24502e+06	0.0440974	0.0572921	mouse
413	922	1.11073e+07	A	0.0572921	Dock5	DOCK5	1674	Dedicator of cytokinesis protein 5	DOCK5_MOUSE|B2RY04	http://www.phosphosite.org/proteinAction.do?id=23642&showAllSites=true	RLSVTS*VASSVISTSSNSSDNASSR	3	860.403	1	A	68.54	10760972	11453659	2154071	2335970	1.11073e+07	2.24502e+06	0.0440974	0.0572921	mouse
414	923	1.03447e+08	A	0.105056	Dock5	DOCK5	1828	Dedicator of cytokinesis protein 5	DOCK5_MOUSE|B2RY04	http://www.phosphosite.org/proteinAction.do?id=23642&showAllSites=true	SKPYESS*QRNSAEIAPPLPVR	3	802.732	2	A	48.835	1.05922e+08	1.00971e+08	7.77581e+07	6.70044e+07	1.03447e+08	7.23812e+07	0.0338424	0.105056	mouse
415	924	8.27689e+07	A	0.16333	Git1	GIT1	§580	ARF GTPase-activating protein GIT1	GIT1_MOUSE|Q68FF6	http://www.phosphosite.org/proteinAction.do?id=3413&showAllSites=true	GVSASSVPFTPSS*PLLSCSQEGSR	3	839.716	3	A	71.78	7.49961e+07	5.94668e+07	8.63805e+07	7.91573e+07	6.72315e+07	8.27689e+07	0.16333	0.0617092	mouse
416	925	1.483e+07	A	0.521823	Git1	GIT1	§601	ARF GTPase-activating protein GIT1	GIT1_MOUSE|Q68FF6	http://www.phosphosite.org/proteinAction.do?id=3413&showAllSites=true	HGS*GADSDYENTQSGDPLLGLEGK	3	843.025	3	A	65.54	1.65803e+07	1.30796e+07	1.85656e+07	8.55755e+06	1.483e+07	1.35615e+07	0.166917	0.521823	mouse
417	926	1.483e+07	A	0.521823	Git1	GIT1	§605	ARF GTPase-activating protein GIT1	GIT1_MOUSE|Q68FF6	http://www.phosphosite.org/proteinAction.do?id=3413&showAllSites=true	HGSGADS*DYENTQSGDPLLGLEGK	3	843.025	1	A	65.54	1.65803e+07	1.30796e+07	1.85656e+07	8.55755e+06	1.483e+07	1.35615e+07	0.166917	0.521823	mouse
418	927	9.83028e+06	A	0.10515	Git1	GIT1	577	ARF GTPase-activating protein GIT1	GIT1_MOUSE|Q68FF6	http://www.phosphosite.org/proteinAction.do?id=3413&showAllSites=true	GVSASSVPFT*PSSPLLSCSQEGSR	2	1259.07	1	A	71.4	8.25302e+06	8.98517e+06	1.05612e+07	9.09937e+06	8.61909e+06	9.83028e+06	0.0600648	0.10515	mouse
419	930	8.27689e+07	A	0.16333	Git1	GIT1	579	ARF GTPase-activating protein GIT1	GIT1_MOUSE|Q68FF6	http://www.phosphosite.org/proteinAction.do?id=3413&showAllSites=true	GVSASSVPFTPS*SPLLSCSQEGSR	3	839.716	6	A	71.78	7.49961e+07	5.94668e+07	8.63805e+07	7.91573e+07	6.72315e+07	8.27689e+07	0.16333	0.0617092	mouse
420	932	4.12124e+07	A	0.58215	Git2	GIT2	§463	ARF GTPase-activating protein GIT2	GIT2_MOUSE|Q9JLQ2	http://www.phosphosite.org/proteinAction.do?id=2762&showAllSites=true	GSRPMS*MYETGSGQKPYLPMGEASHPEESR	4	844.866	5	A	53.965	1.2433e+07	2.98304e+07	4.01036e+07	4.23213e+07	2.11317e+07	4.12124e+07	0.58215	0.0380509	mouse
421	933	17654275	A	0.129206	Git2	GIT2	§506	ARF GTPase-activating protein GIT2	GIT2_MOUSE|Q9JLQ2	http://www.phosphosite.org/proteinAction.do?id=2762&showAllSites=true	SALVTSS*SSLPSFPSTLSWSR	2	1139.04	1	A	95.39	14764909	15848380	16041338	19267212	1.53066e+07	17654275	0.0500521	0.129206	mouse
422	934	27293984	A	0.221612	Git2	GIT2	§508	ARF GTPase-activating protein GIT2	GIT2_MOUSE|Q9JLQ2	http://www.phosphosite.org/proteinAction.do?id=2762&showAllSites=true	SALVTSSSS*LPSFPSTLSWSR	3	759.698	1	A	95.44	21829116	15914548	30157532	24430436	18871832	27293984	0.221612	0.148372	mouse
423	935	1.2856e+07	A	0.502969	Git2	GIT2	429	ARF GTPase-activating protein GIT2	GIT2_MOUSE|Q9JLQ2	http://www.phosphosite.org/proteinAction.do?id=2762&showAllSites=true	QAT*ASACQVQTGSDHK	3	590.249	3	A	16.42	5.15372e+06	1.0843e+07	1.39789e+07	1.17332e+07	7.99836e+06	1.2856e+07	0.502969	0.123519	mouse
424	936	16671852	A	0.184142	Git2	GIT2	469	ARF GTPase-activating protein GIT2	GIT2_MOUSE|Q9JLQ2	http://www.phosphosite.org/proteinAction.do?id=2762&showAllSites=true	GSRPMSM#YETGS*GQKPYLPMGEASHPEESR	4	848.865	3	A	49.34	17524500	15389141	18842660	14501044	1.64568e+07	16671852	0.0917508	0.184142	mouse
425	939	17654275	A	0.129206	Git2	GIT2	514	ARF GTPase-activating protein GIT2	GIT2_MOUSE|Q9JLQ2	http://www.phosphosite.org/proteinAction.do?id=2762&showAllSites=true	SALVTSSSSLPSFPS*TLSWSR	2	1139.04	1	A	95.39	14764909	15848380	16041338	19267212	1.53066e+07	17654275	0.0500521	0.129206	mouse
426	940	5.03396e+07	A	0.262327	Itgb1bp1	ICAP1	§34	Integrin beta-1-binding protein 1	ITBP1_MOUSE|O35671	http://www.phosphosite.org/proteinAction.do?id=5569&showAllSites=true	SVDSSLGGLS*R	2	579.264	4	A	44.565	3.16648e+07	4.27238e+07	5.96773e+07	4.1002e+07	3.71943e+07	5.03396e+07	0.210245	0.262327	mouse
427	944	8.39626e+07	A	0.226665	Lrrfip1;Lrrfip1	LRRFIP1;LRRFIP1 iso2 iso 2	§88; 236	Leucine-rich repeat flightless-interacting protein 1	LRRF1_MOUSE|Q3UZ39;LRRF1_MOUSE|Q3UZ39-2	http://www.phosphosite.org/proteinAction.do?id=1905803&showAllSites=true	RGS*GDTSISMDTEASIR	3	621.603	9	A	42.0625	6.53894e+07	9.01954e+07	9.74198e+07	7.05054e+07	7.77924e+07	8.39626e+07	0.225478	0.226665	mouse
428	945	4.66587e+06	A	0.727153	Lrrfip1;Lrrfip1	LRRFIP1;LRRFIP1 iso2 iso 2	§94; 242	Leucine-rich repeat flightless-interacting protein 1	LRRF1_MOUSE|Q3UZ39;LRRF1_MOUSE|Q3UZ39-2	http://www.phosphosite.org/proteinAction.do?id=1905803&showAllSites=true	RGSGDTSIS*M#DTEASIR	2	939.899	1	A	35.87	4.24956e+06	5.08218e+06	2.02984e+06	6.32642e+06	4.66587e+06	4.17813e+06	0.126181	0.727153	mouse
429	999	3.99176e+08	A	0.0934752	Lsp1;Lsp1	LSP1;LSP1 iso3 iso 2	§243; 241	Lymphocyte-specific protein 1	LSP1_MOUSE|P19973;LSP1_MOUSE|P19973-2	http://www.phosphosite.org/proteinAction.do?id=7689&showAllSites=true	QPS*IELPSMAVASTK	3	546.932	182	A	70.1575	4.06246e+08	3.92107e+08	3.85161e+08	3.37402e+08	3.99176e+08	3.61282e+08	0.025045	0.0934752	mouse
430	1000	4.87959e+07	A	0.0328399	Lyst	LYST	§2097	Lysosomal-trafficking regulator	LYST_MOUSE|P97412	http://www.phosphosite.org/proteinAction.do?id=12542&showAllSites=true	S*RSLPAFPTYLPLIR	3	604.325	1	A	97.74	4.82112e+07	4.93805e+07	4.54314e+07	4.33693e+07	4.87959e+07	4.44004e+07	0.0169444	0.0328399	mouse
431	1004	4.87959e+07	A	0.0328399	Lyst	LYST	§2099	Lysosomal-trafficking regulator	LYST_MOUSE|P97412	http://www.phosphosite.org/proteinAction.do?id=12542&showAllSites=true	SRS*LPAFPTYLPLIR	3	604.325	7	A	97.74	4.82112e+07	4.93805e+07	4.54314e+07	4.33693e+07	4.87959e+07	4.44004e+07	0.0169444	0.0328399	mouse
432	1007	1.17606e+07	A	0.213704	Magi1;Magi1	MAGI1;MAGI1 iso4 iso 3	1053; 1053	Membrane-associated guanylate kinase, WW and PDZ domain-containing protein 1	MAGI1_MOUSE|Q6RHR9;MAGI1_MOUSE|Q6RHR9-3	http://www.phosphosite.org/proteinAction.do?id=13297&showAllSites=true	KSHS*DIVNLIK	2	667.347	3	A	62.5867	7.94631e+06	9.13043e+06	1.35377e+07	9.98342e+06	8.53837e+06	1.17606e+07	0.0980631	0.213704	mouse
433	1009	25519056	A	0.284046	Magi1;Magi1;Magi1	MAGI1;MAGI1 iso2 iso 2;MAGI1 iso4 iso 3	§733; 721; 733	Membrane-associated guanylate kinase, WW and PDZ domain-containing protein 1	MAGI1_MOUSE|Q6RHR9;MAGI1_MOUSE|Q6RHR9-2;MAGI1_MOUSE|Q6RHR9-3	http://www.phosphosite.org/proteinAction.do?id=13297&showAllSites=true	KDS*QNSSQHSVSSHR	4	441.692	8	A	11.4725	18365522	14803512	30644588	20393524	16584517	25519056	0.151872	0.284046	mouse
434	1010	1666016	A	0.408873	Magi1;Magi1;Magi1	MAGI1;MAGI1 iso2 iso 2;MAGI1 iso4 iso 3	§736, §737; 724, 725; 736, 737	Membrane-associated guanylate kinase, WW and PDZ domain-containing protein 1	MAGI1_MOUSE|Q6RHR9;MAGI1_MOUSE|Q6RHR9-2;MAGI1_MOUSE|Q6RHR9-3	http://www.phosphosite.org/proteinAction.do?id=13297&showAllSites=true	KDSQNS*S*QHSVSSHR	3	615.242	1	A	12.09	1184343	2147689	1359927	1532349	1666016	1446138	0.408873	0.0843078	mouse
435	1012	5.96593e+07	A	0.208136	Magi1;Magi1;Magi1	MAGI1;MAGI1 iso2 iso 2;MAGI1 iso4 iso 3	§746; 734; 746	Membrane-associated guanylate kinase, WW and PDZ domain-containing protein 1	MAGI1_MOUSE|Q6RHR9;MAGI1_MOUSE|Q6RHR9-2;MAGI1_MOUSE|Q6RHR9-3	http://www.phosphosite.org/proteinAction.do?id=13297&showAllSites=true	S*LHTASPSHGIQVLPEYLPADAPAPDQTDSSGQK	4	899.424	3	A	68.28	4.39557e+07	4.69775e+07	6.84397e+07	5.0879e+07	4.54666e+07	5.96593e+07	0.0469967	0.208136	mouse
436	1013	5.96593e+07	A	0.208136	Magi1;Magi1;Magi1	MAGI1;MAGI1 iso2 iso 2;MAGI1 iso4 iso 3	§749; 737; 749	Membrane-associated guanylate kinase, WW and PDZ domain-containing protein 1	MAGI1_MOUSE|Q6RHR9;MAGI1_MOUSE|Q6RHR9-2;MAGI1_MOUSE|Q6RHR9-3	http://www.phosphosite.org/proteinAction.do?id=13297&showAllSites=true	SLHT*ASPSHGIQVLPEYLPADAPAPDQTDSSGQK	4	899.424	1	A	68.28	4.39557e+07	4.69775e+07	6.84397e+07	5.0879e+07	4.54666e+07	5.96593e+07	0.0469967	0.208136	mouse
437	1014	5.96593e+07	A	0.208136	Magi1;Magi1;Magi1	MAGI1;MAGI1 iso2 iso 2;MAGI1 iso4 iso 3	§751; 739; 751	Membrane-associated guanylate kinase, WW and PDZ domain-containing protein 1	MAGI1_MOUSE|Q6RHR9;MAGI1_MOUSE|Q6RHR9-2;MAGI1_MOUSE|Q6RHR9-3	http://www.phosphosite.org/proteinAction.do?id=13297&showAllSites=true	SLHTAS*PSHGIQVLPEYLPADAPAPDQTDSSGQK	4	899.424	1	A	68.28	4.39557e+07	4.69775e+07	6.84397e+07	5.0879e+07	4.54666e+07	5.96593e+07	0.0469967	0.208136	mouse
438	1016	5.96593e+07	A	0.208136	Magi1;Magi1;Magi1	MAGI1;MAGI1 iso2 iso 2;MAGI1 iso4 iso 3	§753; 741; 753	Membrane-associated guanylate kinase, WW and PDZ domain-containing protein 1	MAGI1_MOUSE|Q6RHR9;MAGI1_MOUSE|Q6RHR9-2;MAGI1_MOUSE|Q6RHR9-3	http://www.phosphosite.org/proteinAction.do?id=13297&showAllSites=true	SLHTASPS*HGIQVLPEYLPADAPAPDQTDSSGQK	4	899.424	3	A	68.28	4.39557e+07	4.69775e+07	6.84397e+07	5.0879e+07	4.54666e+07	5.96593e+07	0.0469967	0.208136	mouse
439	1017	9.88815e+06	A	0.12772	Magi1;Yap1;Yap1;Magi1;Magi1;Wwc2;Wwc1;Magi2;Magi2;Magi2	MAGI1;YAP1;YAP1 iso 2;MAGI1 iso2 iso 2;MAGI1 iso4 iso 3;WWC2;KIBRA;AIP1;AIP1 iso4 iso 2;AIP1 iso4 iso 4	327; 242; 242; 327; 327; §37; 33; 328; 165; 165	Membrane-associated guanylate kinase, WW and PDZ domain-containing protein 1	MAGI1_MOUSE|Q6RHR9;YAP1_MOUSE|P46938;YAP1_MOUSE|P46938-2;MAGI1_MOUSE|Q6RHR9-2;MAGI1_MOUSE|Q6RHR9-3;WWC2_MOUSE|Q6NXJ0;KIBRA_MOUSE|Q5SXA9;MAGI2_MOUSE|Q9WVQ1;MAGI2_MOUSE|Q9WVQ1-2;MAGI2_MOUSE|Q9WVQ1-4	http://www.phosphosite.org/proteinAction.do?id=13297&showAllSites=true	TS*WIDPR	2	477.708	3	A	50.1033	9.31901e+06	1.04573e+07	1.06823e+07	8.91269e+06	9.88815e+06	9.79752e+06	0.0813983	0.12772	mouse
440	1018	5.40403e+06	A	0.0872928	Mllt4;Mllt4	Afadin;Afadin iso2 iso 2	§1083; 1068	Afadin	AFAD_MOUSE|Q9QZQ1;AFAD_MOUSE|Q9QZQ1-2	http://www.phosphosite.org/proteinAction.do?id=4440&showAllSites=true	TSS*VVTLEVAK	2	607.307	2	A	51.11	4.33803e+06	4.90879e+06	5.10899e+06	5.69907e+06	4.62341e+06	5.40403e+06	0.0872928	0.0772118	mouse
441	1023	3.74376e+07	A	0.656346	Mllt4;Mllt4	Afadin;Afadin iso2 iso 2	§1107; 1092	Afadin	AFAD_MOUSE|Q9QZQ1;AFAD_MOUSE|Q9QZQ1-2	http://www.phosphosite.org/proteinAction.do?id=4440&showAllSites=true	QGAIYHGLATLLNQPS*PMMQR	3	802.72	12	A	81.485	2.00626e+07	5.48127e+07	2.92113e+07	3.24291e+07	3.74376e+07	3.08202e+07	0.656346	0.0738266	mouse
442	1024	2.92763e+07	A	0.328841	Mllt4;Mllt4	Afadin;Afadin iso2 iso 2	§1126; 1111	Afadin	AFAD_MOUSE|Q9QZQ1;AFAD_MOUSE|Q9QZQ1-2	http://www.phosphosite.org/proteinAction.do?id=4440&showAllSites=true	PKS*EGFELYNNSAQNGSPESPQMPWTEYSEPK	3	1236.87	3	A	80.8	1.72291e+07	2.7669e+07	3.05882e+07	2.79643e+07	2.24491e+07	2.92763e+07	0.328841	0.0633758	mouse
443	1025	2.92763e+07	A	0.328841	Mllt4;Mllt4	Afadin;Afadin iso2 iso 2	§1132; 1117	Afadin	AFAD_MOUSE|Q9QZQ1;AFAD_MOUSE|Q9QZQ1-2	http://www.phosphosite.org/proteinAction.do?id=4440&showAllSites=true	PKSEGFELY*NNSAQNGSPESPQMPWTEYSEPK	3	1236.87	2	A	80.8	1.72291e+07	2.7669e+07	3.05882e+07	2.79643e+07	2.24491e+07	2.92763e+07	0.328841	0.0633758	mouse
444	1026	2.75661e+07	A	0.20088	Mllt4;Mllt4	Afadin;Afadin iso2 iso 2	§1795; 1780	Afadin	AFAD_MOUSE|Q9QZQ1;AFAD_MOUSE|Q9QZQ1-2	http://www.phosphosite.org/proteinAction.do?id=4440&showAllSites=true	LFS*QGQDVSDK	2	652.282	1	A	48.9	2.47656e+07	1.86051e+07	2.7737e+07	2.73953e+07	2.16854e+07	2.75661e+07	0.20088	0.00876311	mouse
445	1027	1.24116e+07	A	0.0668602	Mllt4;Mllt4	Afadin;Afadin iso2 iso 2	§1811; 1796	Afadin	AFAD_MOUSE|Q9QZQ1;AFAD_MOUSE|Q9QZQ1-2	http://www.phosphosite.org/proteinAction.do?id=4440&showAllSites=true	KLT*ELENELNTK	2	756.371	4	A	59.78	1.01669e+07	1.1176e+07	1.22131e+07	1.261e+07	1.06714e+07	1.24116e+07	0.0668602	0.0226099	mouse
446	1028	1.85453e+07	A	0.315758	NA	NAV1 iso5	36	Uncharacterized protein ENSP00000471857 homolog	YA044_MOUSE|E9Q7Y3	http://www.phosphosite.org/proteinAction.do?id=12610600&showAllSites=true	IHTPGAS*PQLRPR	3	503.928	2	A	29.225	1.08945e+07	1.71579e+07	1.90758e+07	1.80148e+07	1.40262e+07	1.85453e+07	0.315758	0.0404522	mouse
447	1029	736656	A	0.76967	Nav1;Nav1;Nav1	NAV1;NAV1 iso5 iso 3;NAV1 iso5 iso 4	§1000, 1008, 1033; 1000, 1008, 1033; 606, 614, 639	Neuron navigator 1	NAV1_MOUSE|Q8CH77;NAV1_MOUSE|Q8CH77-3;NAV1_MOUSE|Q8CH77-4	http://www.phosphosite.org/proteinAction.do?id=6723&showAllSites=true	VSPT*AATTPRIT*RSNSIPTHEAAFELYSGSQM#GSTLS*LAERPK	6	803.541	1	A	62.57	986212	291067	413991	1059322	638640	736656	0.76967	0.619445	mouse
448	1030	4.0443e+07	A	0.148347	Pik3r5	PIK3R5	§451	Phosphoinositide 3-kinase regulatory subunit 5	PI3R5_MOUSE|Q5SW28	http://www.phosphosite.org/proteinAction.do?id=23282&showAllSites=true	AGS*LCSPLDCPAQLPSR	2	954.921	4	A	64.235	3.62006e+07	4.46853e+07	3.59724e+07	3.01032e+07	4.0443e+07	3.30378e+07	0.148347	0.125619	mouse
449	1031	1.15593e+07	A	0.342228	Pik3r5	PIK3R5	§454	Phosphoinositide 3-kinase regulatory subunit 5	PI3R5_MOUSE|Q5SW28	http://www.phosphosite.org/proteinAction.do?id=23282&showAllSites=true	AGSLCS*PLDCPAQLPSR	3	636.95	4	A	62.8933	1.43565e+07	8.76203e+06	1.22295e+07	8.61072e+06	1.15593e+07	1.04201e+07	0.342228	0.245569	mouse
450	1036	3.30236e+07	A	0.318874	Rap1gap	RAP1GAP iso4	17	Rap1 GTPase-activating protein 1	RPGP1_MOUSE|A2ALS5-3	http://www.phosphosite.org/proteinAction.do?id=14791900&showAllSites=true	RGS*LPAGAGWQNTDLFEMIEK	3	800.707	8	A	94.89	2.373e+07	3.75465e+07	3.18523e+07	3.41948e+07	3.06383e+07	3.30236e+07	0.318874	0.0501585	mouse
451	1038	4.07544e+07	A	0.131526	Rap1gap;Rap1gap;Rap1gap;Rap1gap	RAP1GAP iso4 iso 3;RAP1GAP;RAP1GAP iso 2;RAP1GAP iso4 iso 4	530; §499; 563; 499	Rap1 GTPase-activating protein 1	RPGP1_MOUSE|A2ALS5-3;RPGP1_MOUSE|A2ALS5;RPGP1_MOUSE|A2ALS5-2;RPGP1_MOUSE|A2ALS5-4	http://www.phosphosite.org/proteinAction.do?id=14791900&showAllSites=true	RSS*AIGIENIQEVQEK	3	627.642	8	A	53.66	3.14372e+07	3.78843e+07	4.33857e+07	3.81231e+07	3.46607e+07	4.07544e+07	0.131526	0.091309	mouse
452	1039	5.18137e+07	A	0.187643	Rapgef2	RAPGEF2	§960	Rap guanine nucleotide exchange factor 2	RPGF2_MOUSE|Q8CHG7	http://www.phosphosite.org/proteinAction.do?id=19927&showAllSites=true	SS*FLNAK	2	423.692	2	A	36.575	3.14389e+07	4.05285e+07	5.86885e+07	4.49388e+07	3.59837e+07	5.18137e+07	0.178618	0.187643	mouse
453	1040	13569762	A	0.607963	Rhoj	RHOJ	§10	Rho-related GTP-binding protein RhoJ	RHOJ_MOUSE|Q9ER71	http://www.phosphosite.org/proteinAction.do?id=1237536&showAllSites=true	ERTDSS*CGCNGHEENR	4	497.681	4	A	12.2133	7678927	4972087	19403336	7736188	6325507	13569762	0.302588	0.607963	mouse
454	1043	2.51521e+08	A	0.753058	Rhoj	RHOJ	§9	Rho-related GTP-binding protein RhoJ	RHOJ_MOUSE|Q9ER71	http://www.phosphosite.org/proteinAction.do?id=1237536&showAllSites=true	ERTDS*SCGCNGHEENR	3	663.239	14	A	12.3275	2.11401e+08	6.44907e+07	2.69819e+08	2.33223e+08	1.37946e+08	2.51521e+08	0.753058	0.102883	mouse
455	1046	984142	A	0.567465	Sbf1;Sbf1	MTMR5;MTMR5 iso2 iso 2	1113, 1117; 1113, 1117	Myotubularin-related protein 5	MTMR5_MOUSE|Q6ZPE2;MTMR5_MOUSE|Q6ZPE2-2	http://www.phosphosite.org/proteinAction.do?id=13789&showAllSites=true	TPSSALKPS*DRMT*M#SSLVER	3	790.347	1	A	107.45	691505	413855	1379037	589247	552680	984142	0.355229	0.567465	mouse
456	1048	8.97803e+08	A	0.159925	Scrib;Scrib;Scrib;Scrib	Scribble;Scribble iso 2;Scribble iso3 iso 3;Scribble iso 4	§475; §475; 475; §475	Protein scribble homolog	SCRIB_MOUSE|Q80U72;SCRIB_MOUSE|Q80U72-2;SCRIB_MOUSE|Q80U72-3;SCRIB_MOUSE|Q80U72-4	http://www.phosphosite.org/proteinAction.do?id=5612&showAllSites=true	RAT*PHPSELK	3	405.868	8	A	16.7425	6.03208e+08	7.57029e+08	9.5763e+08	8.37976e+08	6.80118e+08	8.97803e+08	0.159925	0.0942391	mouse
457	1049	28916248	A	0.321897	Scrib;Scrib;Scrib;Scrib	Scribble;Scribble iso 2;Scribble iso3 iso 3;Scribble iso 4	§606; §606; 606; §606	Protein scribble homolog	SCRIB_MOUSE|Q80U72;SCRIB_MOUSE|Q80U72-2;SCRIB_MOUSE|Q80U72-3;SCRIB_MOUSE|Q80U72-4	http://www.phosphosite.org/proteinAction.do?id=5612&showAllSites=true	KDT*PHYKK	3	366.178	2	A	11.58	23359366	23686000	35498040	22334456	23522683	28916248	0.00981883	0.321897	mouse
458	1050	1.67449e+07	A	0.241423	Synm;Synm	DMN;NARS2 iso 2	§1049; 1049	Synemin	SYNEM_MOUSE|Q70IV5;SYNEM_MOUSE|Q70IV5-2	http://www.phosphosite.org/proteinAction.do?id=14329&showAllSites=true	S*PDREDGEEVPAGGILFK	3	665.973	2	A	67.595	1.10859e+07	1.06073e+07	1.96035e+07	1.38864e+07	1.08466e+07	1.67449e+07	0.0311972	0.241423	mouse
459	1051	3.02639e+07	A	0.163128	Tiam1	TIAM1	§319	T-lymphoma invasion and metastasis-inducing protein 1	TIAM1_MOUSE|Q60610	http://www.phosphosite.org/proteinAction.do?id=4383&showAllSites=true	AKT*TQDVNTGEGSEFADSGIEGATTDTDLLSR	3	1122.83	1	A	72.005	3.37548e+07	2.6773e+07	2.50997e+07	2.42277e+07	3.02639e+07	2.46637e+07	0.163128	0.0249999	mouse
460	1052	2.04517e+06	A	0.296544	Tiam1	TIAM1	§358	T-lymphoma invasion and metastasis-inducing protein 1	TIAM1_MOUSE|Q60610	http://www.phosphosite.org/proteinAction.do?id=4383&showAllSites=true	RSNATNSSYS*PPTGR	3	558.913	1	A	23.84	1.28271e+06	1.96338e+06	2.07634e+06	2.014e+06	1.62304e+06	2.04517e+06	0.296544	0.0215532	mouse
461	1053	1.14993e+07	A	0.204278	Tiam1	TIAM1	§695	T-lymphoma invasion and metastasis-inducing protein 1	TIAM1_MOUSE|Q60610	http://www.phosphosite.org/proteinAction.do?id=4383&showAllSites=true	FSS*LWGLDTTSK	2	711.321	3	A	82.2433	1.07523e+07	1.22462e+07	1.18501e+07	8.8588e+06	1.14993e+07	1.03545e+07	0.0918596	0.204278	mouse
462	1054	3.02639e+07	A	0.163128	Tiam1	TIAM1	320	T-lymphoma invasion and metastasis-inducing protein 1	TIAM1_MOUSE|Q60610	http://www.phosphosite.org/proteinAction.do?id=4383&showAllSites=true	AKTT*QDVNTGEGSEFADSGIEGATTDTDLLSR	3	1122.83	1	A	72.005	3.37548e+07	2.6773e+07	2.50997e+07	2.42277e+07	3.02639e+07	2.46637e+07	0.163128	0.0249999	mouse
463	1055	3.02639e+07	A	0.163128	Tiam1	TIAM1	329	T-lymphoma invasion and metastasis-inducing protein 1	TIAM1_MOUSE|Q60610	http://www.phosphosite.org/proteinAction.do?id=4383&showAllSites=true	AKTTQDVNTGEGS*EFADSGIEGATTDTDLLSR	3	1122.83	2	A	72.005	3.37548e+07	2.6773e+07	2.50997e+07	2.42277e+07	3.02639e+07	2.46637e+07	0.163128	0.0249999	mouse
464	Apoptosis
465	1056	9.53409e+07	A	0.125701	Akt1s1	PRAS40	§199, §203	Proline-rich AKT1 substrate 1	AKTS1_MOUSE|Q9D1F4	http://www.phosphosite.org/proteinAction.do?id=6802&showAllSites=true	RT*EARS*SDEENGPPSSPDLDR	3	825.666	1	A	30.3367	8.68667e+07	1.03815e+08	9.24655e+07	8.72594e+07	9.53409e+07	8.98625e+07	0.125701	0.0409653	mouse
466	1057	3.76796e+07	A	0.067443	Akt1s1	PRAS40	§203	Proline-rich AKT1 substrate 1	AKTS1_MOUSE|Q9D1F4	http://www.phosphosite.org/proteinAction.do?id=6802&showAllSites=true	S*SDEENGPPSSPDLDR	2	891.347	2	A	34	3.04402e+07	3.34889e+07	3.62737e+07	3.90856e+07	3.19645e+07	3.76796e+07	0.067443	0.052769	mouse
467	1059	9.53409e+07	A	0.125701	Akt1s1	PRAS40	§203, §204	Proline-rich AKT1 substrate 1	AKTS1_MOUSE|Q9D1F4	http://www.phosphosite.org/proteinAction.do?id=6802&showAllSites=true	RTEARS*S*DEENGPPSSPDLDR	3	825.666	4	A	30.3367	8.68667e+07	1.03815e+08	9.24655e+07	8.72594e+07	9.53409e+07	8.98625e+07	0.125701	0.0409653	mouse
468	1062	7.89192e+08	A	0.291638	Akt1s1	PRAS40	§203, §204, §212	Proline-rich AKT1 substrate 1	AKTS1_MOUSE|Q9D1F4	http://www.phosphosite.org/proteinAction.do?id=6802&showAllSites=true	RTEARS*S*DEENGPPS*SPDLDR	3	852.321	6	A	31.0825	4.20253e+08	4.89449e+08	9.51939e+08	6.26446e+08	4.54851e+08	7.89192e+08	0.107571	0.291638	mouse
469	1064	7.89192e+08	A	0.291638	Akt1s1	PRAS40	§203, §204, §213	Proline-rich AKT1 substrate 1	AKTS1_MOUSE|Q9D1F4	http://www.phosphosite.org/proteinAction.do?id=6802&showAllSites=true	RTEARS*S*DEENGPPSS*PDLDR	3	852.321	6	A	31.0825	4.20253e+08	4.89449e+08	9.51939e+08	6.26446e+08	4.54851e+08	7.89192e+08	0.107571	0.291638	mouse
470	1065	9.53409e+07	A	0.125701	Akt1s1	PRAS40	§203, §212	Proline-rich AKT1 substrate 1	AKTS1_MOUSE|Q9D1F4	http://www.phosphosite.org/proteinAction.do?id=6802&showAllSites=true	RTEARS*SDEENGPPS*SPDLDR	3	825.666	5	A	30.3367	8.68667e+07	1.03815e+08	9.24655e+07	8.72594e+07	9.53409e+07	8.98625e+07	0.125701	0.0409653	mouse
471	1071	1.71556e+08	A	0.10575	Akt1s1	PRAS40	§203, §213	Proline-rich AKT1 substrate 1	AKTS1_MOUSE|Q9D1F4	http://www.phosphosite.org/proteinAction.do?id=6802&showAllSites=true	TEARS*SDEENGPPSS*PDLDR	3	773.632	5	A	31.15	1.3302e+08	1.54521e+08	1.80588e+08	1.62525e+08	1.4377e+08	1.71556e+08	0.10575	0.0744523	mouse
472	1072	3.76796e+07	A	0.067443	Akt1s1	PRAS40	§204	Proline-rich AKT1 substrate 1	AKTS1_MOUSE|Q9D1F4	http://www.phosphosite.org/proteinAction.do?id=6802&showAllSites=true	SS*DEENGPPSSPDLDR	2	891.347	2	A	34	3.04402e+07	3.34889e+07	3.62737e+07	3.90856e+07	3.19645e+07	3.76796e+07	0.067443	0.052769	mouse
473	1075	1.71556e+08	A	0.10575	Akt1s1	PRAS40	§204, §212	Proline-rich AKT1 substrate 1	AKTS1_MOUSE|Q9D1F4	http://www.phosphosite.org/proteinAction.do?id=6802&showAllSites=true	TEARSS*DEENGPPS*SPDLDR	3	773.632	3	A	31.15	1.3302e+08	1.54521e+08	1.80588e+08	1.62525e+08	1.4377e+08	1.71556e+08	0.10575	0.0744523	mouse
474	1079	1.71556e+08	A	0.10575	Akt1s1	PRAS40	§204, §213	Proline-rich AKT1 substrate 1	AKTS1_MOUSE|Q9D1F4	http://www.phosphosite.org/proteinAction.do?id=6802&showAllSites=true	TEARSS*DEENGPPSS*PDLDR	3	773.632	8	A	31.15	1.3302e+08	1.54521e+08	1.80588e+08	1.62525e+08	1.4377e+08	1.71556e+08	0.10575	0.0744523	mouse
475	1080	1.80558e+08	A	0.0813117	Akt1s1	PRAS40	§212	Proline-rich AKT1 substrate 1	AKTS1_MOUSE|Q9D1F4	http://www.phosphosite.org/proteinAction.do?id=6802&showAllSites=true	SSDEENGPPS*SPDLDR	3	594.567	3	A	33.5833	1.44161e+08	1.28485e+08	1.74238e+08	1.86879e+08	1.36323e+08	1.80558e+08	0.0813117	0.0495056	mouse
476	1083	3.76796e+07	A	0.067443	Akt1s1	PRAS40	§213	Proline-rich AKT1 substrate 1	AKTS1_MOUSE|Q9D1F4	http://www.phosphosite.org/proteinAction.do?id=6802&showAllSites=true	SSDEENGPPSS*PDLDR	2	891.347	11	A	34	3.04402e+07	3.34889e+07	3.62737e+07	3.90856e+07	3.19645e+07	3.76796e+07	0.067443	0.052769	mouse
477	1085	4.84592e+07	A	0.195428	Akt1s1	PRAS40	§222	Proline-rich AKT1 substrate 1	AKTS1_MOUSE|Q9D1F4	http://www.phosphosite.org/proteinAction.do?id=6802&showAllSites=true	IAAS*MR	2	364.662	1	A	21.17	3.55369e+07	4.14524e+07	5.51557e+07	4.17627e+07	3.84946e+07	4.84592e+07	0.108661	0.195428	mouse
478	1093	2.79264e+10	A	0.229029	Akt1s1	PRAS40	§247	Proline-rich AKT1 substrate 1	AKTS1_MOUSE|Q9D1F4	http://www.phosphosite.org/proteinAction.do?id=6802&showAllSites=true	LNT*SDFQK	2	516.723	18	A	31.07	1.59379e+10	2.20977e+10	3.05981e+10	2.52548e+10	1.90178e+10	2.79264e+10	0.229029	0.135293	mouse
479	1096	2.59858e+07	A	0.276543	Bad	BAD	§111, §113	Bcl2-associated agonist of cell death	BAD_MOUSE|Q61337	http://www.phosphosite.org/proteinAction.do?id=924&showAllSites=true	SRHS*SY*PAGTEEDEGM#EEELSPFR	3	972.707	1	A	59.21	1.93253e+07	1.89091e+07	3.10672e+07	2.09044e+07	1.91172e+07	2.59858e+07	0.0153956	0.276543	mouse
480	1104	1.34278e+09	A	0.36609	Bad	BAD	§112	Bcl2-associated agonist of cell death	BAD_MOUSE|Q61337	http://www.phosphosite.org/proteinAction.do?id=924&showAllSites=true	HSS*YPAGTEEDEGM#EEELSPFR	3	865.007	37	A	67.0625	1.69038e+09	9.95182e+08	1.41606e+09	9.95426e+08	1.34278e+09	1.20574e+09	0.36609	0.246678	mouse
481	1128	2.2034e+09	A	0.223096	Bad	BAD	§113	Bcl2-associated agonist of cell death	BAD_MOUSE|Q61337	http://www.phosphosite.org/proteinAction.do?id=924&showAllSites=true	HSSY*PAGTEEDEGMEEELSPFR	3	859.676	40	A	69.285	1.6122e+09	1.76525e+09	2.55099e+09	1.85581e+09	1.68872e+09	2.2034e+09	0.0640866	0.223096	mouse
482	1131	1.34278e+09	A	0.36609	Bad	BAD	§117	Bcl2-associated agonist of cell death	BAD_MOUSE|Q61337	http://www.phosphosite.org/proteinAction.do?id=924&showAllSites=true	HSSYPAGT*EEDEGM#EEELSPFR	3	865.007	5	A	67.0625	1.69038e+09	9.95182e+08	1.41606e+09	9.95426e+08	1.34278e+09	1.20574e+09	0.36609	0.246678	mouse
483	1155	5.68711e+09	A	0.173254	Bad	BAD	§136	Bcl2-associated agonist of cell death	BAD_MOUSE|Q61337	http://www.phosphosite.org/proteinAction.do?id=924&showAllSites=true	SRS*APPNLWAAQR	3	511.916	74	A	52.45	4.60156e+09	4.70693e+09	6.38384e+09	4.99039e+09	4.65425e+09	5.68711e+09	0.0160077	0.173254	mouse
484	1176	4.95881e+09	A	0.177811	Bad	BAD	§155	Bcl2-associated agonist of cell death	BAD_MOUSE|Q61337	http://www.phosphosite.org/proteinAction.do?id=924&showAllSites=true	RMS*DEFEGSFK	2	706.781	81	A	47.7375	3.74386e+09	4.82069e+09	5.40067e+09	4.51695e+09	4.28228e+09	4.95881e+09	0.177811	0.126015	mouse
485	1179	5.24595e+06	A	0.192962	Bad	BAD	§94	Bcl2-associated agonist of cell death	BAD_MOUSE|Q61337	http://www.phosphosite.org/proteinAction.do?id=924&showAllSites=true	AAT*NSHHGGAGAMETR	3	549.895	1	A	14.04	3.85642e+06	5.07508e+06	5.32256e+06	5.16934e+06	4.46575e+06	5.24595e+06	0.192962	0.0206532	mouse
486	1180	5.24595e+06	A	0.192962	Bad	BAD	§96	Bcl2-associated agonist of cell death	BAD_MOUSE|Q61337	http://www.phosphosite.org/proteinAction.do?id=924&showAllSites=true	AATNS*HHGGAGAMETR	3	549.895	2	A	14.04	3.85642e+06	5.07508e+06	5.32256e+06	5.16934e+06	4.46575e+06	5.24595e+06	0.192962	0.0206532	mouse
487	1183	4.28096e+07	A	0.432542	Bad	BAD	52	Bcl2-associated agonist of cell death	BAD_MOUSE|Q61337	http://www.phosphosite.org/proteinAction.do?id=924&showAllSites=true	M#FQIPEFEPS*EQEDASATDR	3	808.33	10	A	97.58	5.14557e+07	2.89031e+07	5.59031e+07	2.97161e+07	4.01794e+07	4.28096e+07	0.396897	0.432542	mouse
488	1185	1.15198e+07	A	0.337088	Bcl2l11	BIM	§73	Bcl-2-like protein 11	B2L11_MOUSE|O54918	http://www.phosphosite.org/proteinAction.do?id=2798&showAllSites=true	S*PLFIFVR	2	529.775	3	A	94.4567	1.21366e+07	1.0903e+07	1.38423e+07	8.51363e+06	1.15198e+07	1.1178e+07	0.0757161	0.337088	mouse
489	1186	5.09675e+07	A	0.109157	Bcl2l11	BIM	§83	Bcl-2-like protein 11	B2L11_MOUSE|O54918	http://www.phosphosite.org/proteinAction.do?id=2798&showAllSites=true	RSS*LLSR	2	449.729	1	A	23.25	3.11064e+07	2.73185e+07	5.49014e+07	4.70335e+07	2.92124e+07	5.09675e+07	0.0916882	0.109157	mouse
490	1187	1.28058e+07	A	0.365265	Bcl2l11	BIM	§90	Bcl-2-like protein 11	B2L11_MOUSE|O54918	http://www.phosphosite.org/proteinAction.do?id=2798&showAllSites=true	SSS*GYFSFDTDR	2	724.772	2	A	68.935	6040865	3560907	15360047	10251608	4800886	1.28058e+07	0.365265	0.282076	mouse
491	1188	1.33599e+07	A	0.145451	Bnip2	BNIP2	§114	BCL2/adenovirus E1B 19 kDa protein-interacting protein 2	BNIP2_MOUSE|O54940	http://www.phosphosite.org/proteinAction.do?id=14624&showAllSites=true	KGS*ITEYTATEEK	2	768.845	3	A	31.8467	1.36863e+07	1.30335e+07	1.23028e+07	1.00081e+07	1.33599e+07	1.11555e+07	0.0345465	0.145451	mouse
492	1190	3.87299e+07	A	0.18438	Ccdc6	CCDC6	§316	Coiled-coil domain-containing protein 6	CCDC6_MOUSE|D3YZP9	http://www.phosphosite.org/proteinAction.do?id=11670&showAllSites=true	QLS*ESESSLEMDDER	2	917.856	8	A	45.605	2.00834e+07	2.61053e+07	3.98406e+07	3.76191e+07	2.30943e+07	3.87299e+07	0.18438	0.0405597	mouse
493	1193	3.87299e+07	A	0.18438	Ccdc6	CCDC6	§318	Coiled-coil domain-containing protein 6	CCDC6_MOUSE|D3YZP9	http://www.phosphosite.org/proteinAction.do?id=11670&showAllSites=true	QLSES*ESSLEMDDER	2	917.856	7	A	45.605	2.00834e+07	2.61053e+07	3.98406e+07	3.76191e+07	2.30943e+07	3.87299e+07	0.18438	0.0405597	mouse
494	1194	1.6082e+07	A	0.505129	Ccdc6	CCDC6	§318, §320	Coiled-coil domain-containing protein 6	CCDC6_MOUSE|D3YZP9	http://www.phosphosite.org/proteinAction.do?id=11670&showAllSites=true	QLSES*ES*SLEMDDER	2	957.839	1	A	49.33	3.02405e+06	6.38466e+06	2.17366e+07	1.04274e+07	4.70435e+06	1.6082e+07	0.505129	0.497254	mouse
495	1195	1.6082e+07	A	0.505129	Ccdc6	CCDC6	§318, §321	Coiled-coil domain-containing protein 6	CCDC6_MOUSE|D3YZP9	http://www.phosphosite.org/proteinAction.do?id=11670&showAllSites=true	QLSES*ESS*LEMDDER	2	957.839	1	A	49.33	3.02405e+06	6.38466e+06	2.17366e+07	1.04274e+07	4.70435e+06	1.6082e+07	0.505129	0.497254	mouse
496	1196	17099408	A	0.143251	Ccdc6	CCDC6	§320	Coiled-coil domain-containing protein 6	CCDC6_MOUSE|D3YZP9	http://www.phosphosite.org/proteinAction.do?id=11670&showAllSites=true	QLSESES*SLEM#DDER	3	617.571	1	A	42.56	5096785	4159210	18652356	15546460	4.628e+06	17099408	0.143251	0.128437	mouse
497	1197	3.51775e+07	A	0.24947	Ccdc6	CCDC6	§342, §354	Coiled-coil domain-containing protein 6	CCDC6_MOUSE|D3YZP9	http://www.phosphosite.org/proteinAction.do?id=11670&showAllSites=true	T*VSSPIPYTPSPS*SSRPISPGLSYASHTVGFTPPTSLTR	3	1397.33	1	A	82.7	3.72815e+07	3.07534e+07	4.13829e+07	2.89721e+07	3.40175e+07	3.51775e+07	0.135699	0.24947	mouse
498	1198	8.90801e+07	A	0.107462	Ccdc6	CCDC6	§344	Coiled-coil domain-containing protein 6	CCDC6_MOUSE|D3YZP9	http://www.phosphosite.org/proteinAction.do?id=11670&showAllSites=true	TVS*SPIPYTPSPSSSR	2	871.904	4	A	47.475	6.1202e+07	5.95249e+07	9.5849e+07	8.23111e+07	6.03635e+07	8.90801e+07	0.0196458	0.107462	mouse
499	1199	1.00058e+07	A	0.302885	Ccdc6	CCDC6	§344, §360	Coiled-coil domain-containing protein 6	CCDC6_MOUSE|D3YZP9	http://www.phosphosite.org/proteinAction.do?id=11670&showAllSites=true	TVS*SPIPYTPSPSSSRPIS*PGLSYASH	3	978.11	1	A	71.5	7.85233e+06	5.08213e+06	1.10946e+07	8.91705e+06	6.46723e+06	1.00058e+07	0.302885	0.153889	mouse
500	1201	8.90801e+07	A	0.107462	Ccdc6	CCDC6	§345	Coiled-coil domain-containing protein 6	CCDC6_MOUSE|D3YZP9	http://www.phosphosite.org/proteinAction.do?id=11670&showAllSites=true	TVSS*PIPYTPSPSSSR	2	871.904	7	A	47.475	6.1202e+07	5.95249e+07	9.5849e+07	8.23111e+07	6.03635e+07	8.90801e+07	0.0196458	0.107462	mouse
501	1203	7.81236e+07	A	0.232187	Ccdc6	CCDC6	§345, §352	Coiled-coil domain-containing protein 6	CCDC6_MOUSE|D3YZP9	http://www.phosphosite.org/proteinAction.do?id=11670&showAllSites=true	TVSS*PIPYTPS*PSSSR	2	911.887	6	A	49.9625	5.39404e+07	5.99688e+07	9.095e+07	6.52972e+07	5.69546e+07	7.81236e+07	0.0748445	0.232187	mouse
502	1204	1.00058e+07	A	0.302885	Ccdc6	CCDC6	§345, §356	Coiled-coil domain-containing protein 6	CCDC6_MOUSE|D3YZP9	http://www.phosphosite.org/proteinAction.do?id=11670&showAllSites=true	TVSS*PIPYTPSPSSS*RPISPGLSYASH	3	978.11	1	A	71.5	7.85233e+06	5.08213e+06	1.10946e+07	8.91705e+06	6.46723e+06	1.00058e+07	0.302885	0.153889	mouse
503	1205	1.73749e+08	A	0.291021	Ccdc6	CCDC6	§345, §360	Coiled-coil domain-containing protein 6	CCDC6_MOUSE|D3YZP9	http://www.phosphosite.org/proteinAction.do?id=11670&showAllSites=true	TVSS*PIPYTPSPSSSRPIS*PGLSYASHTVGFTPPTSLTR	4	1048.25	1	A	82.69	1.98014e+08	1.30426e+08	1.95982e+08	1.51517e+08	1.6422e+08	1.73749e+08	0.291021	0.18096	mouse
504	1206	1.1111e+07	A	0.133704	Ccdc6	CCDC6	§350	Coiled-coil domain-containing protein 6	CCDC6_MOUSE|D3YZP9	http://www.phosphosite.org/proteinAction.do?id=11670&showAllSites=true	TVSSPIPYT*PSPSSSRPISPGLSYASHTVGFTPPTSLTR	3	1370.68	1	A	80.93	1.13206e+07	9.36495e+06	1.15167e+07	1.07054e+07	1.03428e+07	1.1111e+07	0.133704	0.0516282	mouse
505	1207	8.90801e+07	A	0.107462	Ccdc6	CCDC6	§352	Coiled-coil domain-containing protein 6	CCDC6_MOUSE|D3YZP9	http://www.phosphosite.org/proteinAction.do?id=11670&showAllSites=true	TVSSPIPYTPS*PSSSR	2	871.904	6	A	47.475	6.1202e+07	5.95249e+07	9.5849e+07	8.23111e+07	6.03635e+07	8.90801e+07	0.0196458	0.107462	mouse
506	1210	2.92181e+08	A	0.185317	Ccdc6	CCDC6	§360	Coiled-coil domain-containing protein 6	CCDC6_MOUSE|D3YZP9	http://www.phosphosite.org/proteinAction.do?id=11670&showAllSites=true	PIS*PGLSYASHTVGFTPPTSLTR	3	822.74	6	A	76.4425	3.12211e+08	2.39867e+08	3.07268e+08	2.77093e+08	2.76039e+08	2.92181e+08	0.185317	0.0730269	mouse
507	1213	1.41139e+08	A	0.297646	Ccdc6	CCDC6	§360, §373	Coiled-coil domain-containing protein 6	CCDC6_MOUSE|D3YZP9	http://www.phosphosite.org/proteinAction.do?id=11670&showAllSites=true	PIS*PGLSYASHTVGFT*PPTSLTR	3	849.396	4	A	82.7367	1.34915e+08	8.79988e+07	1.56807e+08	1.25472e+08	1.11457e+08	1.41139e+08	0.297646	0.156987	mouse
508	1214	88697488	A	0.26487	Ccdc6	CCDC6	§364	Coiled-coil domain-containing protein 6	CCDC6_MOUSE|D3YZP9	http://www.phosphosite.org/proteinAction.do?id=11670&showAllSites=true	TVSSPIPYTPSPSSSRPISPGLS*YASHTVGFTPPTSLTR	4	1028.26	3	A	81.0033	96215792	65860380	97248336	80146640	81038086	88697488	0.26487	0.136337	mouse
509	1219	2.21245e+08	A	0.138254	Ccdc6	CCDC6	§373	Coiled-coil domain-containing protein 6	CCDC6_MOUSE|D3YZP9	http://www.phosphosite.org/proteinAction.do?id=11670&showAllSites=true	TVGFT*PPTSLTR	2	678.832	13	A	69.205	1.72455e+08	1.80227e+08	2.42874e+08	1.99616e+08	1.76341e+08	2.21245e+08	0.0311654	0.138254	mouse
510	1221	5.85875e+07	A	0.602671	Ccdc6	CCDC6	386	Coiled-coil domain-containing protein 6	CCDC6_MOUSE|D3YZP9	http://www.phosphosite.org/proteinAction.do?id=11670&showAllSites=true	AGMSYY*NSPGLHVQHMGASHGITRPSPR	4	772.856	3	A	42.92	2.33797e+07	5.81044e+07	7.0788e+07	4.63871e+07	4.07421e+07	5.85875e+07	0.602671	0.2945	mouse
511	1222	2.94571e+07	A	0.280585	Ccdc6	CCDC6	386, 406	Coiled-coil domain-containing protein 6	CCDC6_MOUSE|D3YZP9	http://www.phosphosite.org/proteinAction.do?id=11670&showAllSites=true	AGMSYY*NSPGLHVQHMGASHGITRPS*PR	4	792.848	2	A	48.17	2.36127e+07	3.53015e+07	2.29398e+07	2.10043e+07	2.94571e+07	2.1972e+07	0.280585	0.0622897	mouse
512	1227	1.18618e+08	A	0.417303	Ccdc6	CCDC6	388	Coiled-coil domain-containing protein 6	CCDC6_MOUSE|D3YZP9	http://www.phosphosite.org/proteinAction.do?id=11670&showAllSites=true	AGMSYYNS*PGLHVQHMGASHGITRPSPR	5	618.486	8	A	43.4325	5.57119e+07	1.02354e+08	1.47193e+08	9.0042e+07	7.90327e+07	1.18618e+08	0.417303	0.340692	mouse
513	1229	1.21478e+07	A	0.340767	Ccdc6	CCDC6	399	Coiled-coil domain-containing protein 6	CCDC6_MOUSE|D3YZP9	http://www.phosphosite.org/proteinAction.do?id=11670&showAllSites=true	AGMSYYNSPGLHVQHM#GAS*HGITRPSPR	4	776.855	2	A	40.12	5732994	9026878	9220658	15074871	7379936	1.21478e+07	0.315603	0.340767	mouse
514	1231	1.18618e+08	A	0.417303	Ccdc6	CCDC6	406	Coiled-coil domain-containing protein 6	CCDC6_MOUSE|D3YZP9	http://www.phosphosite.org/proteinAction.do?id=11670&showAllSites=true	AGMSYYNSPGLHVQHMGASHGITRPS*PR	5	618.486	6	A	43.4325	5.57119e+07	1.02354e+08	1.47193e+08	9.0042e+07	7.90327e+07	1.18618e+08	0.417303	0.340692	mouse
515	1232	1.4781e+07	A	0.234339	Dnm1l;Dnm1l;Dnm1l;Dnm1l	DRP1;DRP1 iso6 iso 2;DRP1 iso3 iso 3;DRP1 iso6 iso 4	§622; 596; 579; 492	Dynamin-1-like protein	DNM1L_MOUSE|Q8K1M6;DNM1L_MOUSE|Q8K1M6-2;DNM1L_MOUSE|Q8K1M6-3;DNM1L_MOUSE|Q8K1M6-4	http://www.phosphosite.org/proteinAction.do?id=7004&showAllSites=true	SKPIPIMPAS*PQK	3	491.923	1	A	45.89	1.30582e+07	1.01167e+07	1.72302e+07	1.23317e+07	1.15874e+07	1.4781e+07	0.1795	0.234339	mouse
516	1234	1.36301e+07	A	0.0579623	Ep400;Ep400;Ep400;Ep400;Ep400	p400;p400 iso 2;p400 iso 3;p400 iso 4;p400 iso 5	§320; §320; §320; §320; §320	E1A-binding protein p400	EP400_MOUSE|Q8CHI8;EP400_MOUSE|Q8CHI8-2;EP400_MOUSE|Q8CHI8-3;EP400_MOUSE|Q8CHI8-4;EP400_MOUSE|Q8CHI8-5	http://www.phosphosite.org/proteinAction.do?id=9696&showAllSites=true	TPGVLLPGVGGPSAFGMTSPPPPT*SPSR	3	914.451	2	A	87.42	9.81571e+06	1.06547e+07	1.34745e+07	1.37856e+07	1.02352e+07	1.36301e+07	0.0579623	0.0161391	mouse
517	1235	1.42066e+07	A	0.528543	Ep400;Ep400;Ep400;Ep400;Ep400	p400;p400 iso 2;p400 iso 3;p400 iso 4;p400 iso 5	§321; §321; §321; §321; §321	E1A-binding protein p400	EP400_MOUSE|Q8CHI8;EP400_MOUSE|Q8CHI8-2;EP400_MOUSE|Q8CHI8-3;EP400_MOUSE|Q8CHI8-4;EP400_MOUSE|Q8CHI8-5	http://www.phosphosite.org/proteinAction.do?id=9696&showAllSites=true	TPGVLLPGVGGPSAFGM#TSPPPPTS*PSR	3	919.782	1	A	82.87	1.95161e+07	8.89707e+06	1.38557e+07	7.76205e+06	1.42066e+07	1.08089e+07	0.528543	0.398641	mouse
518	1238	1.30615e+08	A	0.0474045	Faf1	FAF1	§581	FAS-associated factor 1	FAF1_MOUSE|P54731	http://www.phosphosite.org/proteinAction.do?id=3985&showAllSites=true	TPS*GEFLER	2	558.242	10	A	48.8575	1.29194e+08	1.32035e+08	1.31602e+08	1.23065e+08	1.30615e+08	1.27333e+08	0.0153826	0.0474045	mouse
519	1239	1.33662e+07	A	0.668044	Jmy;Jmy	JMY;JMY iso 3	§701, §704; §701, §704	Junction-mediating and -regulatory protein	JMY_MOUSE|Q9QXM1;JMY_MOUSE|Q9QXM1-3	http://www.phosphosite.org/proteinAction.do?id=2613179&showAllSites=true	RKS*TAS*PVPCEEQCHSLPTVLQGQEK	3	1042.8	1	A	49.95	7052273	19680036	3349785	8038452	1.33662e+07	5.69412e+06	0.668044	0.582248	mouse
520	1241	1.24796e+08	A	0.216391	Jmy;Jmy	JMY;JMY iso 3	§702, §704; §702, §704	Junction-mediating and -regulatory protein	JMY_MOUSE|Q9QXM1;JMY_MOUSE|Q9QXM1-3	http://www.phosphosite.org/proteinAction.do?id=2613179&showAllSites=true	RKST*AS*PVPCEEQCHSLPTVLQGQEK	4	782.35	5	A	49.22	1.2941e+08	1.20182e+08	1.35718e+08	9.96971e+07	1.24796e+08	1.17708e+08	0.0522864	0.216391	mouse
521	1242	9.88834e+06	A	0.259402	Map1s	BPY2-IP1	§684	Microtubule-associated protein 1S	MAP1S_MOUSE|Q8C052	http://www.phosphosite.org/proteinAction.do?id=6752&showAllSites=true	KPPPPAS*PGSSDSSAR	3	539.914	3	A	15.0767	8.07457e+06	1.17021e+07	1.03014e+07	8.3401e+06	9.88834e+06	9.32077e+06	0.259402	0.148795	mouse
522	1245	4.50875e+08	A	0.289494	Map1s	BPY2-IP1	§831	Microtubule-associated protein 1S	MAP1S_MOUSE|Q8C052	http://www.phosphosite.org/proteinAction.do?id=6752&showAllSites=true	KPS*VPK	2	368.194	12	A	16.005	2.7232e+08	4.12507e+08	4.69272e+08	4.32478e+08	3.42414e+08	4.50875e+08	0.289494	0.0577036	mouse
523	1248	7.19123e+07	A	0.227822	Ndrg2;Ndrg2	NDRG2;NDRG2 iso 2	§330, §332; §316, 318	Protein NDRG2	NDRG2_MOUSE|Q9QYG0;NDRG2_MOUSE|Q9QYG0-2	http://www.phosphosite.org/proteinAction.do?id=4691&showAllSites=true	SRT*AS*LTSAASIDGSR	3	580.584	6	A	44.115	5.24144e+07	6.53878e+07	8.34969e+07	6.03276e+07	5.89011e+07	7.19123e+07	0.155746	0.227822	mouse
524	1249	5.76633e+07	A	0.222777	Ndrg2;Ndrg2	NDRG2;NDRG2 iso 2	§330, §334; §316, §320	Protein NDRG2	NDRG2_MOUSE|Q9QYG0;NDRG2_MOUSE|Q9QYG0-2	http://www.phosphosite.org/proteinAction.do?id=4691&showAllSites=true	SRT*ASLT*SAASIDGSR	2	870.372	1	A	42.67	4.85797e+07	6.67468e+07	6.04678e+07	5.09098e+07	5.76633e+07	5.56888e+07	0.222777	0.121363	mouse
525	1250	7.19123e+07	A	0.227822	Ndrg2;Ndrg2	NDRG2;NDRG2 iso 2	§332, §334; 318, §320	Protein NDRG2	NDRG2_MOUSE|Q9QYG0;NDRG2_MOUSE|Q9QYG0-2	http://www.phosphosite.org/proteinAction.do?id=4691&showAllSites=true	SRTAS*LT*SAASIDGSR	3	580.584	2	A	44.115	5.24144e+07	6.53878e+07	8.34969e+07	6.03276e+07	5.89011e+07	7.19123e+07	0.155746	0.227822	mouse
526	1252	3.75109e+08	A	0.0353907	Ndrg2;Ndrg2	NDRG2;NDRG2 iso 2	§332; 318	Protein NDRG2	NDRG2_MOUSE|Q9QYG0;NDRG2_MOUSE|Q9QYG0-2	http://www.phosphosite.org/proteinAction.do?id=4691&showAllSites=true	TAS*LTSAASIDGSR	2	708.822	5	A	42.5867	3.69486e+08	3.65667e+08	3.65722e+08	3.84496e+08	3.67577e+08	3.75109e+08	0.00734656	0.0353907	mouse
527	1253	3.75109e+08	A	0.0353907	Ndrg2;Ndrg2	NDRG2;NDRG2 iso 2	§338; 324	Protein NDRG2	NDRG2_MOUSE|Q9QYG0;NDRG2_MOUSE|Q9QYG0-2	http://www.phosphosite.org/proteinAction.do?id=4691&showAllSites=true	TASLTSAAS*IDGSR	2	708.822	3	A	42.5867	3.69486e+08	3.65667e+08	3.65722e+08	3.84496e+08	3.67577e+08	3.75109e+08	0.00734656	0.0353907	mouse
528	1254	3.40554e+07	A	0.175938	Ndrg2;Ndrg2	NDRG2;NDRG2 iso 2	§346, §353; §332, 339	Protein NDRG2	NDRG2_MOUSE|Q9QYG0;NDRG2_MOUSE|Q9QYG0-2	http://www.phosphosite.org/proteinAction.do?id=4691&showAllSites=true	S*RTLSQSS*ESGTLPSGPPGHTMEVSC	3	950.389	1	A	54.48	2.7051e+07	3.08893e+07	3.82921e+07	2.98187e+07	2.89702e+07	3.40554e+07	0.0936855	0.175938	mouse
529	1256	3.40554e+07	A	0.175938	Ndrg2;Ndrg2	NDRG2;NDRG2 iso 2	§350, §357; 336, 343	Protein NDRG2	NDRG2_MOUSE|Q9QYG0;NDRG2_MOUSE|Q9QYG0-2	http://www.phosphosite.org/proteinAction.do?id=4691&showAllSites=true	SRTLS*QSSESGT*LPSGPPGHTMEVSC	3	950.389	1	A	54.48	2.7051e+07	3.08893e+07	3.82921e+07	2.98187e+07	2.89702e+07	3.40554e+07	0.0936855	0.175938	mouse
530	1257	2.13121e+07	A	0.451754	Ndrg2;Ndrg2	NDRG2;NDRG2 iso 2	§353; 339	Protein NDRG2	NDRG2_MOUSE|Q9QYG0;NDRG2_MOUSE|Q9QYG0-2	http://www.phosphosite.org/proteinAction.do?id=4691&showAllSites=true	TLSQSS*ESGTLPSGPPGHTM#EVSC	3	848.021	1	A	49.27	2.812e+07	1.45042e+07	2.37195e+07	1.62734e+07	2.13121e+07	1.99964e+07	0.451754	0.263307	mouse
531	1259	4.57995e+07	A	0.145779	Ndrg2;Ndrg2	NDRG2;NDRG2 iso 2	§357; 343	Protein NDRG2	NDRG2_MOUSE|Q9QYG0;NDRG2_MOUSE|Q9QYG0-2	http://www.phosphosite.org/proteinAction.do?id=4691&showAllSites=true	TLSQSSESGT*LPSGPPGHTMEVSC	3	842.689	4	A	51.47	3.70513e+07	4.55678e+07	4.92762e+07	4.23229e+07	4.13096e+07	4.57995e+07	0.145779	0.107353	mouse
532	1260	5.03625e+06	A	0.146874	Nlrc4	NLRC4	§533	NLR family CARD domain-containing protein 4	NLRC4_MOUSE|Q3UP24	http://www.phosphosite.org/proteinAction.do?id=3248101&showAllSites=true	QES*IQSLR	2	520.742	1	A	37.1	3.69639e+06	4.55315e+06	5.28222e+06	4.79027e+06	4.12477e+06	5.03625e+06	0.146874	0.0690713	mouse
533	1263	1.66567e+08	A	0.304413	Pawr	PAR-4	§156	PRKC apoptosis WT1 regulator protein	PAWR_MOUSE|Q925B0	http://www.phosphosite.org/proteinAction.do?id=8333&showAllSites=true	RRST*GVVNIPAAECLDEYEDDEAGQK	4	751.335	13	A	66.2625	1.13352e+08	1.17429e+08	2.02421e+08	1.30713e+08	1.15391e+08	1.66567e+08	0.0249801	0.304413	mouse
534	1274	1.32488e+08	A	0.246061	Pawr	PAR-4	155	PRKC apoptosis WT1 regulator protein	PAWR_MOUSE|Q925B0	http://www.phosphosite.org/proteinAction.do?id=8333&showAllSites=true	S*TGVVNIPAAECLDEYEDDEAGQK	3	897.377	28	A	76.505	8.79652e+07	6.87785e+07	1.5554e+08	1.09436e+08	7.83718e+07	1.32488e+08	0.173112	0.246061	mouse
535	1275	1.79797e+07	A	0.201263	Pdcd4	PDCD4	§67, §71, §76	Programmed cell death protein 4	PDCD4_MOUSE|Q61823	http://www.phosphosite.org/proteinAction.do?id=4310&showAllSites=true	KNS*SRDS*GRGDS*VSDNGSEAVR	3	840.657	1	A	19.43	1.79698e+07	1.70842e+07	1.54209e+07	2.05385e+07	1.7527e+07	1.79797e+07	0.0357265	0.201263	mouse
536	1276	2.1683e+07	A	0.172803	Pdcd4	PDCD4	§68, §71	Programmed cell death protein 4	PDCD4_MOUSE|Q61823	http://www.phosphosite.org/proteinAction.do?id=4310&showAllSites=true	KNSS*RDS*GRGDSVSDNGSEAVR	3	814.001	1	A	18.01	1.66345e+07	2.12655e+07	2.13988e+07	2.19673e+07	1.895e+07	2.1683e+07	0.172803	0.0185396	mouse
537	1278	1.64642e+08	A	0.147593	Pdcd4	PDCD4	§76	Programmed cell death protein 4	PDCD4_MOUSE|Q61823	http://www.phosphosite.org/proteinAction.do?id=4310&showAllSites=true	DSGRGDS*VSDNGSEAVR	3	596.578	12	A	21.015	1.13998e+08	1.40565e+08	1.65364e+08	1.63921e+08	1.27282e+08	1.64642e+08	0.147593	0.00620111	mouse
538	1280	8.40427e+08	A	0.294978	Pdcd4	PDCD4	§93	Programmed cell death protein 4	PDCD4_MOUSE|Q61823	http://www.phosphosite.org/proteinAction.do?id=4310&showAllSites=true	SGVAVPT*SPK	2	511.75	2	A	31.2367	4.43366e+08	6.77067e+08	8.05574e+08	8.75281e+08	5.60216e+08	8.40427e+08	0.294978	0.0586494	mouse
539	1282	8.40427e+08	A	0.294978	Pdcd4	PDCD4	§94	Programmed cell death protein 4	PDCD4_MOUSE|Q61823	http://www.phosphosite.org/proteinAction.do?id=4310&showAllSites=true	SGVAVPTS*PK	2	511.75	4	A	31.2367	4.43366e+08	6.77067e+08	8.05574e+08	8.75281e+08	5.60216e+08	8.40427e+08	0.294978	0.0586494	mouse
540	1297	1.16064e+10	A	0.0582469	Pea15;Pea15	PEA-15;PEA-15 iso 2	§116; 94	Astrocytic phosphoprotein PEA-15	PEA15_MOUSE|Q62048;PEA15_MOUSE|Q62048-2	http://www.phosphosite.org/proteinAction.do?id=3981&showAllSites=true	QPS*EEEIIK	2	576.763	54	A	46.5825	8.80402e+09	9.56039e+09	1.19788e+10	1.1234e+10	9.18221e+09	1.16064e+10	0.0582469	0.0453764	mouse
541	1298	7.3956e+06	A	0.386736	Phlda1	PHLDA1	98	Pleckstrin homology-like domain family A member 1	PHLA1_MOUSE|Q62392	http://www.phosphosite.org/proteinAction.do?id=22224&showAllSites=true	LCLLRVS*LLCALR	3	556.301	1	A	55.21	9418026	5373169	5332448	5050585	7.3956e+06	5.19152e+06	0.386736	0.0383909	mouse
542	1299	3.4066e+07	A	0.25118	Tiam2;Tiam2;Tiam2	TIAM2;TIAM2 iso 2;TIAM2 iso 4	§198; §198; §198	T-lymphoma invasion and metastasis-inducing protein 2	TIAM2_MOUSE|Q6ZPF3;TIAM2_MOUSE|Q6ZPF3-2;TIAM2_MOUSE|Q6ZPF3-4	http://www.phosphosite.org/proteinAction.do?id=19959&showAllSites=true	YS*PTLASETCPVR	2	780.842	4	A	49.2575	3.08509e+07	3.7281e+07	3.19202e+07	2.22916e+07	3.4066e+07	2.71059e+07	0.133468	0.25118	mouse
543	Autophagy
544	1302	1.91733e+08	A	0.219609	Foxo3	FOXO3A	§293	Forkhead box protein O3	FOXO3_MOUSE|Q9WVH4	http://www.phosphosite.org/proteinAction.do?id=1786&showAllSites=true	WPGS*PTSR	2	484.205	7	A	36.715	1.7876e+08	2.04706e+08	2.2069e+08	1.61362e+08	1.91733e+08	1.91026e+08	0.0956892	0.219609	mouse
545	1303	3.73338e+06	A	0.834529	Foxo3	FOXO3A	§299	Forkhead box protein O3	FOXO3_MOUSE|Q9WVH4	http://www.phosphosite.org/proteinAction.do?id=1786&showAllSites=true	SS*DELDAWTDFR	2	761.298	1	A	88.31	874564	595658	5936458	1530311	735111	3.73338e+06	0.268281	0.834529	mouse
546	1307	5.56854e+08	A	0.0981425	Foxo3	FOXO3A	§32	Forkhead box protein O3	FOXO3_MOUSE|Q9WVH4	http://www.phosphosite.org/proteinAction.do?id=1786&showAllSites=true	SCT*WPLQRPELQASPAK	3	683.659	13	A	61.63	5.0498e+08	5.15553e+08	5.95498e+08	5.1821e+08	5.10267e+08	5.56854e+08	0.0146523	0.0981425	mouse
547	1315	5.56854e+08	A	0.0981425	Foxo3	FOXO3A	30	Forkhead box protein O3	FOXO3_MOUSE|Q9WVH4	http://www.phosphosite.org/proteinAction.do?id=1786&showAllSites=true	S*CTWPLQRPELQASPAK	3	683.659	8	A	61.63	5.0498e+08	5.15553e+08	5.95498e+08	5.1821e+08	5.10267e+08	5.56854e+08	0.0146523	0.0981425	mouse
548	1319	1.1579e+07	A	0.249679	Pik3c2a;Pik3c2a	PIK3C2A;PIK3C2A iso 2	1084; 1056	Phosphatidylinositol 4-phosphate 3-kinase C2 domain-containing subunit alpha	P3C2A_MOUSE|Q61194;P3C2A_MOUSE|Q61194-2	http://www.phosphosite.org/proteinAction.do?id=2724&showAllSites=true	VQS*FFLR	2	488.736	4	A	69.9875	8.90238e+06	1.06181e+07	1.36233e+07	9.53475e+06	9.76026e+06	1.1579e+07	0.124302	0.249679	mouse
549	1320	1.35831e+07	A	0.185867	Pik3c3;Pik3c3	PIK3C3;PIK3C3 iso 2	§165; §165	Phosphatidylinositol 3-kinase catalytic subunit type 3	PK3C3_MOUSE|Q6PF93;PK3C3_MOUSE|Q6PF93-2	http://www.phosphosite.org/proteinAction.do?id=7169&showAllSites=true	TSS*TLSEDQMSR	2	711.284	4	A	31.6175	1.04614e+07	1.3204e+07	1.53683e+07	1.17979e+07	1.18327e+07	1.35831e+07	0.163896	0.185867	mouse
550	C2H2-type zinc finger protein
551	1321	1.04165e+07	A	0.590505	Klf9	KLF9	129	Krueppel-like factor 9	KLF9_MOUSE|O35739	http://www.phosphosite.org/proteinAction.do?id=20202&showAllSites=true	GSAPSPLSLLHS*GVASK	3	563.285	1	A	51.31	13294377	5462462	14496394	6336517	9.37842e+06	1.04165e+07	0.590505	0.553922	mouse
552	1322	30057927	A	0.432861	Zbtb49	ZNF509	138	Zinc finger and BTB domain-containing protein 49	ZBT49_MOUSE|Q8BXX2	http://www.phosphosite.org/proteinAction.do?id=22274&showAllSites=true	SAPAAQLPGLPCAGGFSLQS*VALD	3	803.05	1	A	48.31	37523256	19936150	29341638	30774216	28729703	30057927	0.432861	0.0337011	mouse
553	1323	1.16556e+07	A	0.0657881	Zfp26	ZNF624	631, 633, 634	Zinc finger protein 26	ZFP26_MOUSE|P10076	http://www.phosphosite.org/proteinAction.do?id=5134566&showAllSites=true	KT*HS*S*ERPFQCK	3	582.215	1	A	13.63	8.95923e+06	9.76254e+06	1.21978e+07	1.11134e+07	9.36089e+06	1.16556e+07	0.0606811	0.0657881	mouse
554	1325	3.7159e+07	A	0.133842	Znf48	ZNF553	382	Zinc finger protein 48	ZNF48_MOUSE|Q3US17	http://www.phosphosite.org/proteinAction.do?id=16627&showAllSites=true	TSPS*LTPR	2	469.721	1	A	28.52	2.68166e+07	3.2423e+07	3.8839e+07	3.5479e+07	2.96198e+07	3.7159e+07	0.133842	0.0639381	mouse
555	1326	9.17536e+06	A	0.252817	Znf609	ZNF609	§467	Zinc finger protein 609	ZN609_MOUSE|Q8BZ47	http://www.phosphosite.org/proteinAction.do?id=11571&showAllSites=true	TNS*MGSATGPLPGTK	2	749.834	1	A	42.77	7.52969e+06	5.24583e+06	9.57658e+06	8.77414e+06	6.38776e+06	9.17536e+06	0.252817	0.0618405	mouse
556	1327	29794118	A	0.0831523	Znf800	ZNF800	551	Zinc finger protein 800	ZN800_MOUSE|Q0VEE6	http://www.phosphosite.org/proteinAction.do?id=24192&showAllSites=true	KIT*ASLEIR	2	555.8	1	A	66.05	29818568	29769668	23429122	20826972	29794118	22128047	0.00116055	0.0831523	mouse
557	Calcium-binding protein
558	1328	2.23756e+08	A	0.213683	Cep131	CEP131	§78	Centrosomal protein of 131 kDa	CP131_MOUSE|Q62036	http://www.phosphosite.org/proteinAction.do?id=19911&showAllSites=true	SNS*TTQVNQSWTGSPR	2	915.394	4	A	41.19	1.61757e+08	1.77106e+08	2.57565e+08	1.89948e+08	1.69432e+08	2.23756e+08	0.0640614	0.213683	mouse
559	1329	4.59076e+07	A	0.189109	Cep131	CEP131	79	Centrosomal protein of 131 kDa	CP131_MOUSE|Q62036	http://www.phosphosite.org/proteinAction.do?id=19911&showAllSites=true	SNST*TQVNQSWTGSPR	3	610.599	2	A	41.575	1.879e+07	2.10426e+07	5.20464e+07	3.97688e+07	1.99163e+07	4.59076e+07	0.079974	0.189109	mouse
560	1330	6.93607e+07	A	0.10904	Cep131;Kif9;Rbbp6;Rbbp6	CEP131;KIF9;RBBP6;RBBP6 iso2 iso 2	§114; 526; §1660; 1626	Centrosomal protein of 131 kDa	CP131_MOUSE|Q62036;KIF9_MOUSE|Q9WV04;RBBP6_MOUSE|P97868;RBBP6_MOUSE|P97868-2	http://www.phosphosite.org/proteinAction.do?id=19911&showAllSites=true	VAS*LSK	2	342.67	1	A	18.19	4.72017e+07	4.81836e+07	7.47086e+07	6.40128e+07	4.76927e+07	6.93607e+07	0.0145582	0.10904	mouse
561	1331	3.28928e+07	A	0.116347	Chordc1	CHORDC1	§199	Cysteine and histidine-rich domain-containing protein 1	CHRD1_MOUSE|Q9D1P4	http://www.phosphosite.org/proteinAction.do?id=16382&showAllSites=true	RKT*SDFNTFLAQEGCTR	3	704.317	3	A	52.84	2.65975e+07	2.69189e+07	3.55989e+07	3.01867e+07	2.67582e+07	3.28928e+07	0.00849382	0.116347	mouse
562	1332	3.28928e+07	A	0.116347	Chordc1	CHORDC1	§200	Cysteine and histidine-rich domain-containing protein 1	CHRD1_MOUSE|Q9D1P4	http://www.phosphosite.org/proteinAction.do?id=16382&showAllSites=true	RKTS*DFNTFLAQEGCTR	3	704.317	1	A	52.84	2.65975e+07	2.69189e+07	3.55989e+07	3.01867e+07	2.67582e+07	3.28928e+07	0.00849382	0.116347	mouse
563	1334	9.08679e+08	A	0.134022	Chp1	CHP	§7	Calcineurin B homologous protein 1	CHP1_MOUSE|P61022	http://www.phosphosite.org/proteinAction.do?id=2453542&showAllSites=true	AST*LLRDEELEEIKK	3	618.647	9	A	50.6425	9.42748e+08	8.74609e+08	8.74604e+08	7.23185e+08	9.08679e+08	7.98894e+08	0.0530234	0.134022	mouse
564	1338	6.10432e+06	A	0.266525	Pitpnm2	PITPNM2	§858, §866	Membrane-associated phosphatidylinositol transfer protein 2	PITM2_MOUSE|Q6ZPQ6	http://www.phosphosite.org/proteinAction.do?id=14489&showAllSites=true	RLS*LLALPPPS*PTTQGPR	3	687.681	5	A	77.405	6.0668e+06	6.14184e+06	6.38378e+06	4.35915e+06	6.10432e+06	5.37147e+06	0.00869235	0.266525	mouse
565	1339	7.78861e+06	A	0.29727	Pitpnm2;Pitpnm2	PITPNM2;PITPNM2 iso2 iso 2	1049, 1054, 1055; 995, 1000, 1001	Membrane-associated phosphatidylinositol transfer protein 2	PITM2_MOUSE|Q6ZPQ6;PITM2_MOUSE|Q6ZPQ6-2	http://www.phosphosite.org/proteinAction.do?id=14489&showAllSites=true	S*GRVSY*T*IPETHR	2	871.839	2	A	38.685	6.15143e+06	9.42578e+06	4.90777e+06	5.82693e+06	7.78861e+06	5.36735e+06	0.29727	0.121093	mouse
566	Cell adhesion
567	1342	6.11385e+08	A	0.130543	Cgnl1;Cgnl1;Cgnl1;Cgnl1	CGNL1;CGNL1 iso 3;CGNL1 iso 4;CGNL1 iso 5	§284; §284; §284; §284	Cingulin-like protein 1	CGNL1_MOUSE|Q6AW69;CGNL1_MOUSE|Q6AW69-3;CGNL1_MOUSE|Q6AW69-4;CGNL1_MOUSE|Q6AW69-5	http://www.phosphosite.org/proteinAction.do?id=16276&showAllSites=true	RQDS*AGPILDGAR	2	718.338	15	A	37.9075	5.17311e+08	6.22528e+08	5.92102e+08	6.30668e+08	5.69919e+08	6.11385e+08	0.130543	0.044603	mouse
568	1345	6.47922e+07	A	0.166688	Cgnl1;Cgnl1;Cgnl1;Cgnl1	CGNL1;CGNL1 iso 3;CGNL1 iso 4;CGNL1 iso 5	§298; §298; §298; §298	Cingulin-like protein 1	CGNL1_MOUSE|Q6AW69;CGNL1_MOUSE|Q6AW69-3;CGNL1_MOUSE|Q6AW69-4;CGNL1_MOUSE|Q6AW69-5	http://www.phosphosite.org/proteinAction.do?id=16276&showAllSites=true	RSS*SSSTTPTSATSLYK	2	920.92	6	A	36.4	4.97414e+07	6.30338e+07	6.42648e+07	6.53196e+07	5.63876e+07	6.47922e+07	0.166688	0.0115114	mouse
569	1348	1.59897e+08	A	0.178954	Cgnl1;Cgnl1;Cgnl1;Cgnl1	CGNL1;CGNL1 iso 3;CGNL1 iso 4;CGNL1 iso 5	§299; §299; §299; §299	Cingulin-like protein 1	CGNL1_MOUSE|Q6AW69;CGNL1_MOUSE|Q6AW69-3;CGNL1_MOUSE|Q6AW69-4;CGNL1_MOUSE|Q6AW69-5	http://www.phosphosite.org/proteinAction.do?id=16276&showAllSites=true	RSSS*SSTTPTSATSLYK	3	614.282	4	A	39.0733	1.09032e+08	1.40623e+08	1.75864e+08	1.4393e+08	1.24827e+08	1.59897e+08	0.178954	0.141221	mouse
570	1350	8.63767e+06	A	0.753757	Cgnl1;Cgnl1;Cgnl1;Cgnl1	CGNL1;CGNL1 iso 3;CGNL1 iso 4;CGNL1 iso 5	§300, §305; §300, §305; §300, §305; §300, §305	Cingulin-like protein 1	CGNL1_MOUSE|Q6AW69;CGNL1_MOUSE|Q6AW69-3;CGNL1_MOUSE|Q6AW69-4;CGNL1_MOUSE|Q6AW69-5	http://www.phosphosite.org/proteinAction.do?id=16276&showAllSites=true	RSSSS*STTPT*SATSLYK	2	960.903	1	A	40.63	2.77602e+06	9.11238e+06	1.05327e+07	6.7426e+06	5.9442e+06	8.63767e+06	0.753757	0.310273	mouse
571	1351	6.47922e+07	A	0.166688	Cgnl1;Cgnl1;Cgnl1;Cgnl1	CGNL1;CGNL1 iso 3;CGNL1 iso 4;CGNL1 iso 5	§300; §300; §300; §300	Cingulin-like protein 1	CGNL1_MOUSE|Q6AW69;CGNL1_MOUSE|Q6AW69-3;CGNL1_MOUSE|Q6AW69-4;CGNL1_MOUSE|Q6AW69-5	http://www.phosphosite.org/proteinAction.do?id=16276&showAllSites=true	RSSSS*STTPTSATSLYK	2	920.92	3	A	36.4	4.97414e+07	6.30338e+07	6.42648e+07	6.53196e+07	5.63876e+07	6.47922e+07	0.166688	0.0115114	mouse
572	1355	3.76716e+07	A	0.464824	Erbb2ip;Erbb2ip;Erbb2ip	Erbin;Erbin iso2 iso 1;Erbin iso2 iso 2	§1013; 1013; 1013	Protein LAP2	LAP2_MOUSE|Q80TH2;LAP2_MOUSE|Q80TH2-1;LAP2_MOUSE|Q80TH2-2	http://www.phosphosite.org/proteinAction.do?id=5501&showAllSites=true	SES*AENHSYAK	3	434.838	5	A	14.435	1.68925e+07	1.98542e+07	5.00536e+07	2.52897e+07	1.83733e+07	3.76716e+07	0.113982	0.464824	mouse
573	1356	1.15227e+07	A	0.165947	Erbb2ip;Erbb2ip;Erbb2ip	Erbin;Erbin iso2 iso 1;Erbin iso2 iso 2	§1077; 1077; 1077	Protein LAP2	LAP2_MOUSE|Q80TH2;LAP2_MOUSE|Q80TH2-1;LAP2_MOUSE|Q80TH2-2	http://www.phosphosite.org/proteinAction.do?id=5501&showAllSites=true	QSS*VSSTASVNLGDPTR	2	893.404	2	A	45.8	5.54332e+06	5.29998e+06	1.28747e+07	1.01706e+07	5.42165e+06	1.15227e+07	0.0317374	0.165947	mouse
574	1357	8.16556e+06	A	0.228896	Erbb2ip;Erbb2ip;Erbb2ip	Erbin;Erbin iso2 iso 1;Erbin iso2 iso 2	§1125; 1125; 1125	Protein LAP2	LAP2_MOUSE|Q80TH2;LAP2_MOUSE|Q80TH2-1;LAP2_MOUSE|Q80TH2-2	http://www.phosphosite.org/proteinAction.do?id=5501&showAllSites=true	AYS*IDGPNTSRPQSAR	3	600.607	1	A	34.02	3.51236e+06	4.8689e+06	8.05753e+06	8.2736e+06	4.19063e+06	8.16556e+06	0.228896	0.0187108	mouse
575	1358	2.71572e+07	A	0.16344	Erbb2ip;Erbb2ip;Erbb2ip	Erbin;Erbin iso2 iso 1;Erbin iso2 iso 2	123; 123; 123	Protein LAP2	LAP2_MOUSE|Q80TH2;LAP2_MOUSE|Q80TH2-1;LAP2_MOUSE|Q80TH2-2	http://www.phosphosite.org/proteinAction.do?id=5501&showAllSites=true	IVEAS*VNPISK	2	618.815	2	A	65.95	1.30345e+07	1.34335e+07	3.02958e+07	2.40187e+07	1.3234e+07	2.71572e+07	0.021319	0.16344	mouse
576	1359	2.71572e+07	A	0.16344	Erbb2ip;Erbb2ip;Erbb2ip	Erbin;Erbin iso2 iso 1;Erbin iso2 iso 2	128; 128; 128	Protein LAP2	LAP2_MOUSE|Q80TH2;LAP2_MOUSE|Q80TH2-1;LAP2_MOUSE|Q80TH2-2	http://www.phosphosite.org/proteinAction.do?id=5501&showAllSites=true	IVEASVNPIS*K	2	618.815	1	A	65.95	1.30345e+07	1.34335e+07	3.02958e+07	2.40187e+07	1.3234e+07	2.71572e+07	0.021319	0.16344	mouse
577	1362	7.64828e+07	A	0.245017	Msln	MSLN	5	Mesothelin	MSLN_MOUSE|Q61468	http://www.phosphosite.org/proteinAction.do?id=15757755&showAllSites=true	M#ALPT*ARPLLGSCGSPIC	2	998.956	5	A	63.2233	8.91076e+07	6.3858e+07	8.90809e+07	6.27719e+07	7.64828e+07	7.59264e+07	0.23344	0.245017	mouse
578	1363	1.03029e+07	A	0.244387	Pkp4;Pkp4	plakophilin 4;plakophilin 4 iso2 iso 2	§313; 313	Plakophilin-4	PKP4_MOUSE|Q68FH0;PKP4_MOUSE|Q68FH0-2	http://www.phosphosite.org/proteinAction.do?id=5312&showAllSites=true	VGS*PLTLTDAQTR	2	719.851	3	A	53.64	6.03633e+06	8.55842e+06	1.01431e+07	1.04627e+07	7.29738e+06	1.03029e+07	0.244387	0.0219367	mouse
579	1364	1.10842e+09	A	0.0644028	Tjap1	TJAP1	§527	Tight junction-associated protein 1	TJAP1_MOUSE|Q9DCD5	http://www.phosphosite.org/proteinAction.do?id=3089&showAllSites=true	KDS*LTQAQEQGTVLS	2	842.893	2	A	45.18	1.02977e+09	1.12804e+09	1.14123e+09	1.07561e+09	1.0789e+09	1.10842e+09	0.0644028	0.0418626	mouse
580	1367	4.37066e+07	A	0.252417	Tjap1	TJAP1	§529	Tight junction-associated protein 1	TJAP1_MOUSE|Q9DCD5	http://www.phosphosite.org/proteinAction.do?id=3089&showAllSites=true	KDSLT*QAQEQGTVLS	3	562.264	9	A	45.3875	2.14059e+07	3.07073e+07	4.85037e+07	3.89094e+07	2.60566e+07	4.37066e+07	0.252417	0.155222	mouse
581	Cell cycle regulation
582	1368	9834415	A	0.436858	Anapc1	APC1	518	Anaphase-promoting complex subunit 1	APC1_MOUSE|P53995	http://www.phosphosite.org/proteinAction.do?id=11239&showAllSites=true	VFIPGLPAPS*LTMSNMMPRPSTPLDGVGTPK	3	1096.88	1	A	94.535	4518098	8557095	6902894	12765936	6.5376e+06	9834415	0.436858	0.42156	mouse
583	1371	9834415	A	0.436858	Anapc1	APC1	529	Anaphase-promoting complex subunit 1	APC1_MOUSE|P53995	http://www.phosphosite.org/proteinAction.do?id=11239&showAllSites=true	VFIPGLPAPSLTMSNMMPRPS*TPLDGVGTPK	3	1096.88	3	A	94.535	4518098	8557095	6902894	12765936	6.5376e+06	9834415	0.436858	0.42156	mouse
584	1379	4.80433e+07	A	0.205914	Arpp19;Arpp19	ARPP-19;ARPP-19 iso 2	§104; 88	cAMP-regulated phosphoprotein 19	ARP19_MOUSE|P56212;ARP19_MOUSE|P56212-2	http://www.phosphosite.org/proteinAction.do?id=5266&showAllSites=true	TEVTGDHIPTPQDLPQRKPS*LVASK	4	699.359	27	A	22.385	4.57799e+07	3.98122e+07	5.50386e+07	4.10481e+07	4.2796e+07	4.80433e+07	0.098604	0.205914	mouse
585	1382	3.85435e+08	A	0.145422	Atrip	ATRIP	§97	ATR-interacting protein	ATRIP_MOUSE|Q8BMG1	http://www.phosphosite.org/proteinAction.do?id=6643&showAllSites=true	RLDGLPNS*PIRK	3	482.592	8	A	39.2275	3.39583e+08	4.17425e+08	4.05143e+08	3.65727e+08	3.78504e+08	3.85435e+08	0.145422	0.0723112	mouse
586	1383	7.43965e+06	A	0.341995	Ccny	CBCP1	§66	Cyclin-Y	CCNY_MOUSE|Q8BGU5	http://www.phosphosite.org/proteinAction.do?id=8281&showAllSites=true	AS*TIFLSK	2	473.736	2	A	53.695	5.64054e+06	9.23876e+06	5.92468e+06	5.79234e+06	7.43965e+06	5.85851e+06	0.341995	0.0159734	mouse
587	1384	2.38734e+07	A	0.202917	Cenpu	CENPU	§164	Centromere protein U	CENPU_MOUSE|Q8C4M7	http://www.phosphosite.org/proteinAction.do?id=17436&showAllSites=true	QAAPAAPS*PPERPAEPVTPR	3	707.016	4	A	40.195	2.04479e+07	2.72988e+07	1.95901e+07	1.67398e+07	2.38734e+07	1.81649e+07	0.202917	0.110951	mouse
588	1385	1.84624e+07	A	0.271305	Cenpu	CENPU	§182, §186	Centromere protein U	CENPU_MOUSE|Q8C4M7	http://www.phosphosite.org/proteinAction.do?id=17436&showAllSites=true	LHS*AQLS*PVDETPATQSQLK	3	770.685	1	A	49.46	1.9014e+07	1.79108e+07	1.96783e+07	1.33434e+07	1.84624e+07	1.65108e+07	0.0422532	0.271305	mouse
589	1390	6.2192e+07	A	0.504331	Cep170	CEP170	§1008	Centrosomal protein of 170 kDa	CE170_MOUSE|Q6A065	http://www.phosphosite.org/proteinAction.do?id=12215&showAllSites=true	IRQPS*IDLTDDDQTSSVPHSAISDIMSSDQETYSCK	4	1027.45	14	A	65.29	3.74352e+07	7.89344e+07	6.28495e+07	6.15346e+07	5.81848e+07	6.2192e+07	0.504331	0.0149503	mouse
590	1393	6.2192e+07	A	0.504331	Cep170	CEP170	§1012	Centrosomal protein of 170 kDa	CE170_MOUSE|Q6A065	http://www.phosphosite.org/proteinAction.do?id=12215&showAllSites=true	IRQPSIDLT*DDDQTSSVPHSAISDIMSSDQETYSCK	4	1027.45	3	A	65.29	3.74352e+07	7.89344e+07	6.28495e+07	6.15346e+07	5.81848e+07	6.2192e+07	0.504331	0.0149503	mouse
591	1394	23582736	A	0.561803	Cep170	CEP170	§1026	Centrosomal protein of 170 kDa	CE170_MOUSE|Q6A065	http://www.phosphosite.org/proteinAction.do?id=12215&showAllSites=true	IRQPSIDLTDDDQTSSVPHSAIS*DIM#SSDQETYSCK	4	1031.45	1	A	66.72	32951096	14214376	16707310	8607468	23582736	12657389	0.561803	0.452499	mouse
592	1395	9.54424e+06	A	0.343099	Cep170	CEP170	§1030	Centrosomal protein of 170 kDa	CE170_MOUSE|Q6A065	http://www.phosphosite.org/proteinAction.do?id=12215&showAllSites=true	SAISDIMS*SDQETYSCK	2	1001.39	3	A	62.025	8.38713e+06	1.03621e+07	1.18598e+07	7.22873e+06	9.37461e+06	9.54424e+06	0.148967	0.343099	mouse
593	1396	9.54424e+06	A	0.343099	Cep170	CEP170	§1031	Centrosomal protein of 170 kDa	CE170_MOUSE|Q6A065	http://www.phosphosite.org/proteinAction.do?id=12215&showAllSites=true	SAISDIMSS*DQETYSCK	2	1001.39	2	A	62.025	8.38713e+06	1.03621e+07	1.18598e+07	7.22873e+06	9.37461e+06	9.54424e+06	0.148967	0.343099	mouse
594	1397	6.80501e+06	A	0.302104	Cep170	CEP170	§1047	Centrosomal protein of 170 kDa	CE170_MOUSE|Q6A065	http://www.phosphosite.org/proteinAction.do?id=12215&showAllSites=true	TPLT*SADEHNIHSK	3	543.914	2	A	25.29	6.9431e+06	6.66693e+06	6.02583e+06	3.90451e+06	6.80501e+06	4.96517e+06	0.0286973	0.302104	mouse
595	1398	6.78127e+06	A	0.314294	Cep170	CEP170	§1150, §1155	Centrosomal protein of 170 kDa	CE170_MOUSE|Q6A065	http://www.phosphosite.org/proteinAction.do?id=12215&showAllSites=true	LGS*LSARS*DSEATISR	3	603.931	1	A	44.24	4.10209e+06	5.51224e+06	8.28834e+06	5.27421e+06	4.80717e+06	6.78127e+06	0.207426	0.314294	mouse
596	1399	3.41058e+06	A	0.235468	Cep170	CEP170	§1213	Centrosomal protein of 170 kDa	CE170_MOUSE|Q6A065	http://www.phosphosite.org/proteinAction.do?id=12215&showAllSites=true	SMSSTHGS*PSVNSR	2	757.309	2	A	16.76	3241158	2315901	3084353	3736816	2.77853e+06	3.41058e+06	0.235468	0.135273	mouse
597	1401	1.07414e+08	A	0.130669	Cep170	CEP170	§829	Centrosomal protein of 170 kDa	CE170_MOUSE|Q6A065	http://www.phosphosite.org/proteinAction.do?id=12215&showAllSites=true	QGS*FTIDKPSSNIPIELIPHINK	3	876.786	2	A	61.33	1.17338e+08	9.7489e+07	1.08836e+08	9.87036e+07	1.07414e+08	1.0377e+08	0.130669	0.0690415	mouse
598	1402	1.07414e+08	A	0.130669	Cep170	CEP170	§831	Centrosomal protein of 170 kDa	CE170_MOUSE|Q6A065	http://www.phosphosite.org/proteinAction.do?id=12215&showAllSites=true	QGSFT*IDKPSSNIPIELIPHINK	3	876.786	2	A	61.33	1.17338e+08	9.7489e+07	1.08836e+08	9.87036e+07	1.07414e+08	1.0377e+08	0.130669	0.0690415	mouse
599	1406	2.69362e+07	A	0.274871	Cep170	CEP170	§837	Centrosomal protein of 170 kDa	CE170_MOUSE|Q6A065	http://www.phosphosite.org/proteinAction.do?id=12215&showAllSites=true	QGSFTIDKPSS*NIPIELIPHINK	4	657.841	9	A	84.39	2.37012e+07	1.59873e+07	2.98406e+07	2.40319e+07	1.98443e+07	2.69362e+07	0.274871	0.152485	mouse
600	1407	3.41058e+06	A	0.235468	Cep170	CEP170	1209	Centrosomal protein of 170 kDa	CE170_MOUSE|Q6A065	http://www.phosphosite.org/proteinAction.do?id=12215&showAllSites=true	SMSS*THGSPSVNSR	2	757.309	1	A	16.76	3241158	2315901	3084353	3736816	2.77853e+06	3.41058e+06	0.235468	0.135273	mouse
601	1408	2.28971e+07	A	0.185454	Cep170;Cep170	CEP170;CEP170 iso 3	§1260; 3	Centrosomal protein of 170 kDa	CE170_MOUSE|Q6A065;CE170_MOUSE|Q6A065-3	http://www.phosphosite.org/proteinAction.do?id=12215&showAllSites=true	MQS*TGSAMPASSSFK	2	798.825	4	A	45.415	1.98945e+07	2.58998e+07	2.09233e+07	1.76182e+07	2.28971e+07	1.92707e+07	0.185454	0.121275	mouse
602	1410	5.31075e+07	A	0.0789592	Clasp1;Clasp1	CLASP1;CLASP1 iso3 iso 2	§1088; 1117	CLIP-associating protein 1	CLAP1_MOUSE|Q80TV8;CLAP1_MOUSE|Q80TV8-2	http://www.phosphosite.org/proteinAction.do?id=10953&showAllSites=true	NSSNTGVGS*PSNTIGR	2	814.357	4	A	30.9225	5.01424e+07	5.60726e+07	3.93876e+07	4.09043e+07	5.31075e+07	4.01459e+07	0.0789592	0.0267127	mouse
603	1411	1.15839e+07	A	0.277046	Clasp1;Clasp1	CLASP1;CLASP1 iso3 iso 2	§600; 600	CLIP-associating protein 1	CLAP1_MOUSE|Q80TV8;CLAP1_MOUSE|Q80TV8-2	http://www.phosphosite.org/proteinAction.do?id=10953&showAllSites=true	SRS*DIDVNAAASAK	2	742.841	4	A	28.1325	7.93646e+06	1.18035e+07	1.04846e+07	1.26832e+07	9.87e+06	1.15839e+07	0.277046	0.134208	mouse
604	1415	6.38865e+08	A	0.0878339	Clasp1;Clasp1	CLASP1;CLASP1 iso3 iso 2	§633; 633	CLIP-associating protein 1	CLAP1_MOUSE|Q80TV8;CLAP1_MOUSE|Q80TV8-2	http://www.phosphosite.org/proteinAction.do?id=10953&showAllSites=true	VSSSSGSPAFSSAAALPPGS*YASLGR	3	831.055	10	A	70.91	6.54177e+08	5.77669e+08	6.48578e+08	6.29152e+08	6.15923e+08	6.38865e+08	0.0878339	0.0215012	mouse
605	1419	6.38865e+08	A	0.0878339	Clasp1;Clasp1	CLASP1;CLASP1 iso3 iso 2	§636; 636	CLIP-associating protein 1	CLAP1_MOUSE|Q80TV8;CLAP1_MOUSE|Q80TV8-2	http://www.phosphosite.org/proteinAction.do?id=10953&showAllSites=true	VSSSSGSPAFSSAAALPPGSYAS*LGR	3	831.055	13	A	70.91	6.54177e+08	5.77669e+08	6.48578e+08	6.29152e+08	6.15923e+08	6.38865e+08	0.0878339	0.0215012	mouse
606	1421	6.38865e+08	A	0.0878339	Clasp1;Clasp1	CLASP1;CLASP1 iso3 iso 2	634; 634	CLIP-associating protein 1	CLAP1_MOUSE|Q80TV8;CLAP1_MOUSE|Q80TV8-2	http://www.phosphosite.org/proteinAction.do?id=10953&showAllSites=true	VSSSSGSPAFSSAAALPPGSY*ASLGR	3	831.055	3	A	70.91	6.54177e+08	5.77669e+08	6.48578e+08	6.29152e+08	6.15923e+08	6.38865e+08	0.0878339	0.0215012	mouse
607	1427	8.88394e+08	A	0.269652	Dnajc2	DNAJC2	§47	DnaJ homolog subfamily C member 2	DNJC2_MOUSE|P54103	http://www.phosphosite.org/proteinAction.do?id=16717&showAllSites=true	NAS*TSFQELEDKK	3	526.235	21	A	49.1525	5.86323e+08	7.64308e+08	1.05779e+09	7.19001e+08	6.75316e+08	8.88394e+08	0.186363	0.269652	mouse
608	1429	8.88394e+08	A	0.269652	Dnajc2	DNAJC2	§48	DnaJ homolog subfamily C member 2	DNJC2_MOUSE|P54103	http://www.phosphosite.org/proteinAction.do?id=16717&showAllSites=true	NAST*SFQELEDKK	3	526.235	2	A	49.1525	5.86323e+08	7.64308e+08	1.05779e+09	7.19001e+08	6.75316e+08	8.88394e+08	0.186363	0.269652	mouse
609	1438	1.62075e+09	A	0.146674	Dync1li1	DNCLI1	§207	Cytoplasmic dynein 1 light intermediate chain 1	DC1L1_MOUSE|Q8R1Q8	http://www.phosphosite.org/proteinAction.do?id=5633&showAllSites=true	DFQEYVEPGEDFPAS*PQR	2	1095.95	103	A	70.1825	1.74361e+09	1.49788e+09	1.17411e+09	9.53448e+08	1.62075e+09	1.06378e+09	0.107207	0.146674	mouse
610	1462	2.27154e+07	A	0.18277	Gtse1	GTSE1	§311	G2 and S phase-expressed protein 1	GTSE1_MOUSE|Q8R080	http://www.phosphosite.org/proteinAction.do?id=3073&showAllSites=true	KSS*TSGSASSLESGVYR	2	891.899	4	A	38.36	2.22872e+07	2.31436e+07	1.30757e+07	1.00828e+07	2.27154e+07	1.15792e+07	0.0266576	0.18277	mouse
611	1464	2.27154e+07	A	0.18277	Gtse1	GTSE1	§312	G2 and S phase-expressed protein 1	GTSE1_MOUSE|Q8R080	http://www.phosphosite.org/proteinAction.do?id=3073&showAllSites=true	KSST*SGSASSLESGVYR	2	891.899	1	A	38.36	2.22872e+07	2.31436e+07	1.30757e+07	1.00828e+07	2.27154e+07	1.15792e+07	0.0266576	0.18277	mouse
612	1465	8.00532e+07	A	0.354884	Gtse1	GTSE1	§313	G2 and S phase-expressed protein 1	GTSE1_MOUSE|Q8R080	http://www.phosphosite.org/proteinAction.do?id=3073&showAllSites=true	KSSTS*GSASSLESGVYR	3	594.935	1	A	38.08	7.02446e+07	7.28238e+07	1.00142e+08	5.99646e+07	7.15342e+07	8.00532e+07	0.025495	0.354884	mouse
613	1466	8.00532e+07	A	0.354884	Gtse1	GTSE1	§315	G2 and S phase-expressed protein 1	GTSE1_MOUSE|Q8R080	http://www.phosphosite.org/proteinAction.do?id=3073&showAllSites=true	KSSTSGS*ASSLESGVYR	3	594.935	3	A	38.08	7.02446e+07	7.28238e+07	1.00142e+08	5.99646e+07	7.15342e+07	8.00532e+07	0.025495	0.354884	mouse
614	1467	40284830	A	0.187944	Gtse1	GTSE1	§478	G2 and S phase-expressed protein 1	GTSE1_MOUSE|Q8R080	http://www.phosphosite.org/proteinAction.do?id=3073&showAllSites=true	LQSWT*PASR	2	563.258	2	A	40.58	35180432	45389228	18188688	23764054	40284830	20976371	0.179192	0.187944	mouse
615	1468	1.86167e+07	A	0.323079	Gtse1	GTSE1	§486	G2 and S phase-expressed protein 1	GTSE1_MOUSE|Q8R080	http://www.phosphosite.org/proteinAction.do?id=3073&showAllSites=true	VVSS*TPVRR	2	540.782	2	A	15.125	1.71813e+07	2.00522e+07	9.60428e+06	1.52918e+07	1.86167e+07	1.24481e+07	0.109045	0.323079	mouse
616	1469	1.86167e+07	A	0.323079	Gtse1	GTSE1	§487	G2 and S phase-expressed protein 1	GTSE1_MOUSE|Q8R080	http://www.phosphosite.org/proteinAction.do?id=3073&showAllSites=true	VVSST*PVRR	2	540.782	1	A	15.125	1.71813e+07	2.00522e+07	9.60428e+06	1.52918e+07	1.86167e+07	1.24481e+07	0.109045	0.323079	mouse
617	1471	6.35161e+07	A	0.0304828	Gtse1	GTSE1	§541	G2 and S phase-expressed protein 1	GTSE1_MOUSE|Q8R080	http://www.phosphosite.org/proteinAction.do?id=3073&showAllSites=true	ALVS*PLCVPAR	2	631.82	5	A	63.9567	6.21471e+07	6.48852e+07	3.67401e+07	3.62592e+07	6.35161e+07	3.64997e+07	0.0304828	0.00931644	mouse
618	1472	9391556	A	0.112745	Gtse1	GTSE1	310	G2 and S phase-expressed protein 1	GTSE1_MOUSE|Q8R080	http://www.phosphosite.org/proteinAction.do?id=3073&showAllSites=true	S*STSGSASSLESGVYR	2	827.851	1	A	47.19	9882899	8900213	7876322	9240956	9391556	8558639	0.0739882	0.112745	mouse
619	1475	2.65117e+08	A	0.188494	Haus8;Haus8	HAUS8;HAUS8 iso 2	§111; 110	HAUS augmin-like complex subunit 8	HAUS8_MOUSE|Q99L00;HAUS8_MOUSE|Q99L00-2	http://www.phosphosite.org/proteinAction.do?id=3754570&showAllSites=true	KAS*WPDREMTDK	3	515.225	9	A	28.62	1.96552e+08	2.3899e+08	3.00453e+08	2.29781e+08	2.17771e+08	2.65117e+08	0.137797	0.188494	mouse
620	1477	8.31122e+06	A	0.284443	Kmt2a;Kmt2a	MLL;MLL iso 2	§748; §748	Histone-lysine N-methyltransferase 2A	KMT2A_MOUSE|P55200;KMT2A_MOUSE|P55200-2	http://www.phosphosite.org/proteinAction.do?id=8986&showAllSites=true	SEPRS*PSHSMR	3	450.859	1	A	14.11	8.39358e+06	8.22887e+06	4.71536e+06	3.13617e+06	8.31122e+06	3.92577e+06	0.0140126	0.284443	mouse
621	1478	19795948	A	0.131102	Kmt2a;Kmt2a	MLL;MLL iso 2	2198; 2195	Histone-lysine N-methyltransferase 2A	KMT2A_MOUSE|P55200;KMT2A_MOUSE|P55200-2	http://www.phosphosite.org/proteinAction.do?id=8986&showAllSites=true	RHST*SSLSPLR	3	440.885	1	A	25.22	15456748	17685522	21631100	17960796	16571135	19795948	0.095104	0.131102	mouse
622	1479	4.73606e+07	A	0.0722604	Kmt2a;Kmt2a;Cnnm3;Cnnm3	MLL;MLL iso 2;CNNM3;CNNM3 iso 2	§740; §740; 518; 518	Histone-lysine N-methyltransferase 2A	KMT2A_MOUSE|P55200;KMT2A_MOUSE|P55200-2;CNNM3_MOUSE|Q32NY4;CNNM3_MOUSE|Q32NY4-2	http://www.phosphosite.org/proteinAction.do?id=8986&showAllSites=true	VFS*PLR	2	399.699	2	A	49.14	4.56897e+07	4.90315e+07	3.79803e+07	3.42877e+07	4.73606e+07	3.6134e+07	0.0498935	0.0722604	mouse
623	1482	2.30453e+07	A	0.147333	Mdc1	MDC1	§168	Mediator of DNA damage checkpoint protein 1	MDC1_MOUSE|Q5PSV9	http://www.phosphosite.org/proteinAction.do?id=9861&showAllSites=true	VLLAADS*EEEGDFPSGR	2	936.407	7	A	63.29	2.3484e+07	2.26065e+07	1.88396e+07	1.52845e+07	2.30453e+07	1.7062e+07	0.0269244	0.147333	mouse
624	1483	1.60567e+07	A	0.259298	Myo16;Myo16;Myo16	MYO16;MYO16 iso 2;MYO16 iso 3	1323; 1323; 1267	Unconventional myosin-XVI	MYO16_MOUSE|Q5DU14;MYO16_MOUSE|Q5DU14-2;MYO16_MOUSE|Q5DU14-3	http://www.phosphosite.org/proteinAction.do?id=12816&showAllSites=true	ALT*RPRPHSDDYSTMK	3	652.3	1	A	26.47	1.31127e+07	1.90007e+07	1.18243e+07	1.27983e+07	1.60567e+07	1.23113e+07	0.259298	0.0559411	mouse
625	1485	1.46062e+07	A	0.159392	Pcnt	PCNT	2052, 2053	Pericentrin	PCNT_MOUSE|P48725-3	http://www.phosphosite.org/proteinAction.do?id=2424204&showAllSites=true	QMKALLQM#VFDESHQILGNSRLLFPS*S*ALNKGEPRDPLD	4	1143.55	1	A	87.68	1.62524e+07	1.296e+07	8.61235e+06	7.94309e+06	1.46062e+07	8.27772e+06	0.159392	0.05717	mouse
626	1486	4.27303e+07	A	0.154541	Pcnt;Pcnt;Pcnt	PCNT iso 3;PCNT;PCNT iso 2	§1437; §1437; 521	Pericentrin	PCNT_MOUSE|P48725-3;PCNT_MOUSE|P48725;PCNT_MOUSE|P48725-2	http://www.phosphosite.org/proteinAction.do?id=2424204&showAllSites=true	RNS*EIDELK	2	592.271	3	A	32.2167	3.90827e+07	4.2004e+07	4.73998e+07	3.80609e+07	4.05434e+07	4.27303e+07	0.0509487	0.154541	mouse
627	1487	4.19069e+07	A	0.124917	Ptms	PTMS	§81	Parathymosin	PTMS_MOUSE|Q9D0J8	http://www.phosphosite.org/proteinAction.do?id=29571006&showAllSites=true	KRT*AEEEDEADPK	3	533.23	3	A	13.64	3.53708e+07	3.8477e+07	4.56085e+07	3.82053e+07	3.69239e+07	4.19069e+07	0.0594839	0.124917	mouse
628	1488	3.68224e+06	A	0.206692	Ranbp1	RANBP1	§60	Ran-specific GTPase-activating protein	RANG_MOUSE|P34022	http://www.phosphosite.org/proteinAction.do?id=7697&showAllSites=true	FAS*ENDLPEWK	2	708.298	2	A	70.56	1.89542e+06	1.41203e+06	3.95655e+06	3.40792e+06	1.65372e+06	3.68224e+06	0.206692	0.105354	mouse
629	1489	1.04992e+07	A	0.553016	Sept9;Sept9	SEPT9;SEPT9 iso3 iso 3	§143; 136	Septin-9	SEPT9_MOUSE|Q80UG5;SEPT9_MOUSE|Q80UG5-3	http://www.phosphosite.org/proteinAction.do?id=8101&showAllSites=true	RAEVLGHKT*PEPVPR	4	442.233	2	A	25.55	4.74203e+06	1.08322e+07	1.07531e+07	1.02453e+07	7.78711e+06	1.04992e+07	0.553016	0.0341976	mouse
630	1491	1.36869e+07	A	0.546321	Ski	SKI	§380	Ski oncogene	SKI_MOUSE|Q60698	http://www.phosphosite.org/proteinAction.do?id=21934&showAllSites=true	LSAFRPWS*PAVSASEK	3	604.961	3	A	67.855	1.80747e+07	8.00135e+06	1.59506e+07	1.14231e+07	1.3038e+07	1.36869e+07	0.546321	0.233909	mouse
631	1492	9.17688e+08	A	0.0130745	Specc1l	SPECC1L	§832	Cytospin-A	CYTSA_MOUSE|Q2KN98	http://www.phosphosite.org/proteinAction.do?id=11511&showAllSites=true	S*STSSEPTPTVK	2	650.787	1	A	23.74	5.16512e+08	5.19777e+08	9.09204e+08	9.26172e+08	5.18145e+08	9.17688e+08	0.00445546	0.0130745	mouse
632	1493	5.77258e+07	A	0.100716	Specc1l	SPECC1L	§832, §833	Cytospin-A	CYTSA_MOUSE|Q2KN98	http://www.phosphosite.org/proteinAction.do?id=11511&showAllSites=true	RS*S*TSSEPTPTVK	2	768.821	1	A	21.2	4.8781e+07	5.62618e+07	5.86343e+07	5.68173e+07	5.25214e+07	5.77258e+07	0.100716	0.0222565	mouse
633	1494	5.77258e+07	A	0.100716	Specc1l	SPECC1L	§832, §834	Cytospin-A	CYTSA_MOUSE|Q2KN98	http://www.phosphosite.org/proteinAction.do?id=11511&showAllSites=true	RS*ST*SSEPTPTVK	2	768.821	1	A	21.2	4.8781e+07	5.62618e+07	5.86343e+07	5.68173e+07	5.25214e+07	5.77258e+07	0.100716	0.0222565	mouse
634	1497	1.23073e+09	A	0.247988	Specc1l	SPECC1L	§833	Cytospin-A	CYTSA_MOUSE|Q2KN98	http://www.phosphosite.org/proteinAction.do?id=11511&showAllSites=true	RSS*TSSEPTPTVK	3	486.228	13	A	20.195	8.14851e+08	9.56416e+08	1.44654e+09	1.01492e+09	8.85633e+08	1.23073e+09	0.113029	0.247988	mouse
635	1500	5.77258e+07	A	0.100716	Specc1l	SPECC1L	§833, §836	Cytospin-A	CYTSA_MOUSE|Q2KN98	http://www.phosphosite.org/proteinAction.do?id=11511&showAllSites=true	RSS*TSS*EPTPTVK	2	768.821	1	A	21.2	4.8781e+07	5.62618e+07	5.86343e+07	5.68173e+07	5.25214e+07	5.77258e+07	0.100716	0.0222565	mouse
636	1501	1.84692e+09	A	0.101382	Specc1l	SPECC1L	§834	Cytospin-A	CYTSA_MOUSE|Q2KN98	http://www.phosphosite.org/proteinAction.do?id=11511&showAllSites=true	RSST*SSEPTPTVK	2	728.838	2	A	19.595	1.71452e+09	1.97932e+09	1.55942e+09	1.72636e+09	1.84692e+09	1.64289e+09	0.101382	0.0718531	mouse
637	1502	5.77258e+07	A	0.100716	Specc1l	SPECC1L	§834, §836	Cytospin-A	CYTSA_MOUSE|Q2KN98	http://www.phosphosite.org/proteinAction.do?id=11511&showAllSites=true	RSST*SS*EPTPTVK	2	768.821	1	A	21.2	4.8781e+07	5.62618e+07	5.86343e+07	5.68173e+07	5.25214e+07	5.77258e+07	0.100716	0.0222565	mouse
638	1504	1.23073e+09	A	0.247988	Specc1l	SPECC1L	§835	Cytospin-A	CYTSA_MOUSE|Q2KN98	http://www.phosphosite.org/proteinAction.do?id=11511&showAllSites=true	RSSTS*SEPTPTVK	3	486.228	4	A	20.195	8.14851e+08	9.56416e+08	1.44654e+09	1.01492e+09	8.85633e+08	1.23073e+09	0.113029	0.247988	mouse
639	1506	1.07896e+07	A	0.0585614	Specc1l	SPECC1L	§835, §836	Cytospin-A	CYTSA_MOUSE|Q2KN98	http://www.phosphosite.org/proteinAction.do?id=11511&showAllSites=true	SSTS*S*EPTPTVK	2	690.77	1	A	26.91	5.96842e+06	5.93381e+06	1.03429e+07	1.12364e+07	5.95111e+06	1.07896e+07	0.00411247	0.0585614	mouse
640	1507	6.96163e+07	A	0.226423	Specc1l	SPECC1L	§869	Cytospin-A	CYTSA_MOUSE|Q2KN98	http://www.phosphosite.org/proteinAction.do?id=11511&showAllSites=true	TPLS*PSPMK	2	519.24	3	A	40.3667	6.04476e+07	7.8785e+07	5.96846e+07	4.32105e+07	6.96163e+07	5.14476e+07	0.186257	0.226423	mouse
641	1508	5275963	A	0.212695	Specc1l	SPECC1L	§949	Cytospin-A	CYTSA_MOUSE|Q2KN98	http://www.phosphosite.org/proteinAction.do?id=11511&showAllSites=true	RSS*EEMKR	3	368.162	3	A	11.76		3960573	6069457	4482469	3960573	5275963		0.212695	mouse
642	1509	5.44389e+07	A	0.0691094	Specc1l	SPECC1L	923	Cytospin-A	CYTSA_MOUSE|Q2KN98	http://www.phosphosite.org/proteinAction.do?id=11511&showAllSites=true	TSS*TSRPASLPR	3	447.217	3	A	23.9133	2.7639e+07	2.72319e+07	5.70992e+07	5.17786e+07	2.74354e+07	5.44389e+07	0.0104902	0.0691094	mouse
643	1511	2.11004e+07	A	0.246679	Tacc2;Tacc2;Tacc2;Tacc2	TACC2 iso1;TACC2 iso1 iso 2;TACC2 iso1 iso 3;TACC2 iso1 iso 4	933; 819; 730; 381	Transforming acidic coiled-coil-containing protein 2	TACC2_MOUSE|Q9JJG0;TACC2_MOUSE|Q9JJG0-2;TACC2_MOUSE|Q9JJG0-3;TACC2_MOUSE|Q9JJG0-4	http://www.phosphosite.org/proteinAction.do?id=15717902&showAllSites=true	IGS*TEVEKPPGLLFQQPDLDSALQVAR	3	996.841	3	A	95.62	1.91759e+07	1.49747e+07	2.47809e+07	1.74199e+07	1.70753e+07	2.11004e+07	0.173979	0.246679	mouse
644	1512	2.11004e+07	A	0.246679	Tacc2;Tacc2;Tacc2;Tacc2	TACC2 iso1;TACC2 iso1 iso 2;TACC2 iso1 iso 3;TACC2 iso1 iso 4	934; 820; 731; 382	Transforming acidic coiled-coil-containing protein 2	TACC2_MOUSE|Q9JJG0;TACC2_MOUSE|Q9JJG0-2;TACC2_MOUSE|Q9JJG0-3;TACC2_MOUSE|Q9JJG0-4	http://www.phosphosite.org/proteinAction.do?id=15717902&showAllSites=true	IGST*EVEKPPGLLFQQPDLDSALQVAR	3	996.841	1	A	95.62	1.91759e+07	1.49747e+07	2.47809e+07	1.74199e+07	1.70753e+07	2.11004e+07	0.173979	0.246679	mouse
645	1515	8.35828e+07	A	0.14204	Tnks1bp1	TNKS1BP1	§1611	182 kDa tankyrase-1-binding protein	TB182_MOUSE|P58871	http://www.phosphosite.org/proteinAction.do?id=4374&showAllSites=true	VPS*SDEEVVEEPQSR	2	883.878	7	A	40.4025	5.44054e+07	6.65543e+07	8.78626e+07	7.9303e+07	6.04799e+07	8.35828e+07	0.14204	0.072414	mouse
646	1516	6.72753e+08	A	0.0655813	Tnks1bp1	TNKS1BP1	§298	182 kDa tankyrase-1-binding protein	TB182_MOUSE|P58871	http://www.phosphosite.org/proteinAction.do?id=4374&showAllSites=true	LANISVPAS*ESPR	2	710.845	3	A	46.4333	6.58857e+08	6.86649e+08	5.91835e+08	5.39377e+08	6.72753e+08	5.65606e+08	0.0292119	0.0655813	mouse
647	1518	6.72753e+08	A	0.0655813	Tnks1bp1	TNKS1BP1	§300	182 kDa tankyrase-1-binding protein	TB182_MOUSE|P58871	http://www.phosphosite.org/proteinAction.do?id=4374&showAllSites=true	LANISVPASES*PR	2	710.845	4	A	46.4333	6.58857e+08	6.86649e+08	5.91835e+08	5.39377e+08	6.72753e+08	5.65606e+08	0.0292119	0.0655813	mouse
648	1521	1.81804e+08	A	0.231809	Tnks1bp1	TNKS1BP1	§429	182 kDa tankyrase-1-binding protein	TB182_MOUSE|P58871	http://www.phosphosite.org/proteinAction.do?id=4374&showAllSites=true	RFS*EGVLQPPSQDQEK	2	962.944	29	A	48.855	1.52004e+08	2.11605e+08	1.9914e+08	1.46354e+08	1.81804e+08	1.72747e+08	0.231809	0.216069	mouse
649	1527	3.23291e+07	A	0.0951964	Tnks1bp1	TNKS1BP1	§602	182 kDa tankyrase-1-binding protein	TB182_MOUSE|P58871	http://www.phosphosite.org/proteinAction.do?id=4374&showAllSites=true	ENYEDQEPLVGHES*PITLAAR	3	816.707	1	A	64.04	3.25881e+07	3.20701e+07	3.22826e+07	2.82106e+07	3.23291e+07	3.02466e+07	0.0113288	0.0951964	mouse
650	1529	1.95374e+07	A	0.169511	Tnks1bp1	TNKS1BP1	368	182 kDa tankyrase-1-binding protein	TB182_MOUSE|P58871	http://www.phosphosite.org/proteinAction.do?id=4374&showAllSites=true	S*SPVETVSGHHSPEQPPVLLPQLLTEGAELPDITR	3	1270.97	2	A	102.44	1.71956e+07	2.18792e+07	1.77958e+07	1.77744e+07	1.95374e+07	1.77851e+07	0.169511	0.000848288	mouse
651	1531	1.95374e+07	A	0.169511	Tnks1bp1	TNKS1BP1	369	182 kDa tankyrase-1-binding protein	TB182_MOUSE|P58871	http://www.phosphosite.org/proteinAction.do?id=4374&showAllSites=true	SS*PVETVSGHHSPEQPPVLLPQLLTEGAELPDITR	3	1270.97	1	A	102.44	1.71956e+07	2.18792e+07	1.77958e+07	1.77744e+07	1.95374e+07	1.77851e+07	0.169511	0.000848288	mouse
652	1534	1.49555e+08	A	0.0975495	Tnks1bp1	TNKS1BP1	373	182 kDa tankyrase-1-binding protein	TB182_MOUSE|P58871	http://www.phosphosite.org/proteinAction.do?id=4374&showAllSites=true	SSPVET*VSGHHSPEQPPVLLPQLLTEGAELPDITR	4	953.479	8	A	102.08	1.53006e+08	1.46105e+08	1.5215e+08	1.32515e+08	1.49555e+08	1.42333e+08	0.0326266	0.0975495	mouse
653	1535	1.49555e+08	A	0.0975495	Tnks1bp1	TNKS1BP1	375	182 kDa tankyrase-1-binding protein	TB182_MOUSE|P58871	http://www.phosphosite.org/proteinAction.do?id=4374&showAllSites=true	SSPVETVS*GHHSPEQPPVLLPQLLTEGAELPDITR	4	953.479	1	A	102.08	1.53006e+08	1.46105e+08	1.5215e+08	1.32515e+08	1.49555e+08	1.42333e+08	0.0326266	0.0975495	mouse
654	1536	1.49555e+08	A	0.0975495	Tnks1bp1	TNKS1BP1	379	182 kDa tankyrase-1-binding protein	TB182_MOUSE|P58871	http://www.phosphosite.org/proteinAction.do?id=4374&showAllSites=true	SSPVETVSGHHS*PEQPPVLLPQLLTEGAELPDITR	4	953.479	2	A	102.08	1.53006e+08	1.46105e+08	1.5215e+08	1.32515e+08	1.49555e+08	1.42333e+08	0.0326266	0.0975495	mouse
655	1538	1.68131e+08	A	0.0690523	Tsc2;Tsc2	TSC2 iso6;TSC2 iso6	§1254; 1211	Tuberin	TSC2_MOUSE|Q61037-6;TSC2_MOUSE|Q61037-7	http://www.phosphosite.org/proteinAction.do?id=1927406&showAllSites=true	SLS*VPAAGTAKPPTLPR	3	581.645	8	A	54.8825	1.60949e+08	1.46674e+08	1.7634e+08	1.59921e+08	1.53812e+08	1.68131e+08	0.0656266	0.0690523	mouse
656	1539	1.06694e+08	A	0.217852	Tsc2;Tsc2;Tsc2;Tsc2	TSC2;TSC2 iso6 iso 2;TSC2 iso6 iso 3;TSC2 iso6 iso 4	§1268; 1231; 1229; 1224	Tuberin	TSC2_MOUSE|Q61037;TSC2_MOUSE|Q61037-2;TSC2_MOUSE|Q61037-3;TSC2_MOUSE|Q61037-4	http://www.phosphosite.org/proteinAction.do?id=1480&showAllSites=true	S*NTVASFSSLYQPSCQGQLHR	3	816.365	1	A	65.94	1.0641e+08	7.8002e+07	1.20174e+08	9.32137e+07	9.22058e+07	1.06694e+08	0.217852	0.178681	mouse
657	1540	1.06694e+08	A	0.217852	Tsc2;Tsc2;Tsc2;Tsc2	TSC2;TSC2 iso6 iso 2;TSC2 iso6 iso 3;TSC2 iso6 iso 4	§1270; 1233; 1231; 1226	Tuberin	TSC2_MOUSE|Q61037;TSC2_MOUSE|Q61037-2;TSC2_MOUSE|Q61037-3;TSC2_MOUSE|Q61037-4	http://www.phosphosite.org/proteinAction.do?id=1480&showAllSites=true	SNT*VASFSSLYQPSCQGQLHR	3	816.365	3	A	65.94	1.0641e+08	7.8002e+07	1.20174e+08	9.32137e+07	9.22058e+07	1.06694e+08	0.217852	0.178681	mouse
658	1542	2.52963e+07	A	0.500977	Tsc2;Tsc2;Tsc2;Tsc2;Tsc2	TSC2;TSC2 iso6 iso 2;TSC2 iso6 iso 3;TSC2 iso6 iso 5;TSC2 iso6 iso 6	§981; 944; 942; §981; §981	Tuberin	TSC2_MOUSE|Q61037;TSC2_MOUSE|Q61037-2;TSC2_MOUSE|Q61037-3;TSC2_MOUSE|Q61037-5;TSC2_MOUSE|Q61037-6	http://www.phosphosite.org/proteinAction.do?id=1480&showAllSites=true	SIS*VSEHVVR	3	398.196	7	A	37.69	1.0787e+07	1.24772e+07	3.42573e+07	1.63352e+07	1.16321e+07	2.52963e+07	0.102742	0.500977	mouse
659	1543	3.31343e+07	A	0.360067	Tsc2;Tsc2;Tsc2;Tsc2;Tsc2;Tsc2	TSC2;TSC2 iso6 iso 2;TSC2 iso6 iso 3;TSC2 iso6 iso 4;TSC2 iso6 iso 5;TSC2 iso6 iso 6	§1805; 1768; 1766; 1761; 1782; §1777	Tuberin	TSC2_MOUSE|Q61037;TSC2_MOUSE|Q61037-2;TSC2_MOUSE|Q61037-3;TSC2_MOUSE|Q61037-4;TSC2_MOUSE|Q61037-5;TSC2_MOUSE|Q61037-6	http://www.phosphosite.org/proteinAction.do?id=1480&showAllSites=true	RLIS*SVDDFTEFV	2	804.371	1	A	112.73	3.4876e+07	3.13927e+07	2.60909e+07	1.55013e+07	3.31343e+07	2.07961e+07	0.0743345	0.360067	mouse
660	1544	3.31343e+07	A	0.360067	Tsc2;Tsc2;Tsc2;Tsc2;Tsc2;Tsc2	TSC2;TSC2 iso6 iso 2;TSC2 iso6 iso 3;TSC2 iso6 iso 4;TSC2 iso6 iso 5;TSC2 iso6 iso 6	§1806; 1769; 1767; 1762; 1783; §1778	Tuberin	TSC2_MOUSE|Q61037;TSC2_MOUSE|Q61037-2;TSC2_MOUSE|Q61037-3;TSC2_MOUSE|Q61037-4;TSC2_MOUSE|Q61037-5;TSC2_MOUSE|Q61037-6	http://www.phosphosite.org/proteinAction.do?id=1480&showAllSites=true	RLISS*VDDFTEFV	2	804.371	1	A	112.73	3.4876e+07	3.13927e+07	2.60909e+07	1.55013e+07	3.31343e+07	2.07961e+07	0.0743345	0.360067	mouse
661	1545	3.20917e+06	A	0.301241	Tsc2;Tsc2;Tsc2;Tsc2;Tsc2;Tsc2;Tsc2	TSC2;TSC2 iso6 iso 2;TSC2 iso6 iso 3;TSC2 iso6 iso 4;TSC2 iso6 iso 5;TSC2 iso6 iso 6;TSC2 iso6 iso 7	§1366; 1329; 1327; 1322; §1343; 1344; 1301	Tuberin	TSC2_MOUSE|Q61037;TSC2_MOUSE|Q61037-2;TSC2_MOUSE|Q61037-3;TSC2_MOUSE|Q61037-4;TSC2_MOUSE|Q61037-5;TSC2_MOUSE|Q61037-6;TSC2_MOUSE|Q61037-7	http://www.phosphosite.org/proteinAction.do?id=1480&showAllSites=true	AISS*EGARPAVDLSFQPSQPLSK	3	822.407	1	A	67.26	1.80892e+06	2.78814e+06	3.18651e+06	3.23183e+06	2.29853e+06	3.20917e+06	0.301241	0.00998608	mouse
662	1546	1.5082e+07	A	0.223166	Tsc2;Tsc2;Tsc2;Tsc2;Tsc2;Tsc2;Tsc2	TSC2;TSC2 iso6 iso 2;TSC2 iso6 iso 3;TSC2 iso6 iso 4;TSC2 iso6 iso 5;TSC2 iso6 iso 6;TSC2 iso6 iso 7	§1419; 1382; 1380; 1375; 1396; §1397; 1354	Tuberin	TSC2_MOUSE|Q61037;TSC2_MOUSE|Q61037-2;TSC2_MOUSE|Q61037-3;TSC2_MOUSE|Q61037-4;TSC2_MOUSE|Q61037-5;TSC2_MOUSE|Q61037-6;TSC2_MOUSE|Q61037-7	http://www.phosphosite.org/proteinAction.do?id=1480&showAllSites=true	S*QSGILDGEAATWSATGEESR	2	1116.48	1	A	71.7575	1.1786e+07	1.24342e+07	1.74619e+07	1.2702e+07	1.21101e+07	1.5082e+07	0.0378523	0.223166	mouse
663	1547	1.5082e+07	A	0.223166	Tsc2;Tsc2;Tsc2;Tsc2;Tsc2;Tsc2;Tsc2	TSC2;TSC2 iso6 iso 2;TSC2 iso6 iso 3;TSC2 iso6 iso 4;TSC2 iso6 iso 5;TSC2 iso6 iso 6;TSC2 iso6 iso 7	§1421; 1384; 1382; 1377; 1398; §1399; 1356	Tuberin	TSC2_MOUSE|Q61037;TSC2_MOUSE|Q61037-2;TSC2_MOUSE|Q61037-3;TSC2_MOUSE|Q61037-4;TSC2_MOUSE|Q61037-5;TSC2_MOUSE|Q61037-6;TSC2_MOUSE|Q61037-7	http://www.phosphosite.org/proteinAction.do?id=1480&showAllSites=true	SQS*GILDGEAATWSATGEESR	2	1116.48	6	A	71.7575	1.1786e+07	1.24342e+07	1.74619e+07	1.2702e+07	1.21101e+07	1.5082e+07	0.0378523	0.223166	mouse
664	1549	9.03935e+07	A	0.31801	Tsc2;Tsc2;Tsc2;Tsc2;Tsc2;Tsc2;Tsc2	TSC2;TSC2 iso6 iso 2;TSC2 iso6 iso 3;TSC2 iso6 iso 4;TSC2 iso6 iso 5;TSC2 iso6 iso 6;TSC2 iso6 iso 7	§1465; 1428; 1426; 1421; 1442; 1443; 1400	Tuberin	TSC2_MOUSE|Q61037;TSC2_MOUSE|Q61037-2;TSC2_MOUSE|Q61037-3;TSC2_MOUSE|Q61037-4;TSC2_MOUSE|Q61037-5;TSC2_MOUSE|Q61037-6;TSC2_MOUSE|Q61037-7	http://www.phosphosite.org/proteinAction.do?id=1480&showAllSites=true	GYT*ISDSAPSR	2	617.261	8	A	36.025	8.0926e+07	8.57227e+07	1.1072e+08	7.0067e+07	8.33243e+07	9.03935e+07	0.0407058	0.31801	mouse
665	1553	3.85521e+07	A	0.237134	Zc3hc1;Zc3hc1	NIPA;NIPA iso2 iso 2	§340; 340	Nuclear-interacting partner of ALK	NIPA_MOUSE|Q80YV2;NIPA_MOUSE|Q80YV2-2	http://www.phosphosite.org/proteinAction.do?id=3472&showAllSites=true	SQDATVSPGSEQS*EKSPGPIVSR	3	808.374	1	A	33.23	3.20877e+07	4.50165e+07	1.22134e+07	1.3978e+07	3.85521e+07	1.30957e+07	0.237134	0.0952776	mouse
666	1554	3.85521e+07	A	0.237134	Zc3hc1;Zc3hc1	NIPA;NIPA iso2 iso 2	§343; 343	Nuclear-interacting partner of ALK	NIPA_MOUSE|Q80YV2;NIPA_MOUSE|Q80YV2-2	http://www.phosphosite.org/proteinAction.do?id=3472&showAllSites=true	SQDATVSPGSEQSEKS*PGPIVSR	3	808.374	3	A	33.23	3.20877e+07	4.50165e+07	1.22134e+07	1.3978e+07	3.85521e+07	1.30957e+07	0.237134	0.0952776	mouse
667	1555	1.16519e+07	A	0.251717	Zc3hc1;Zc3hc1	NIPA;NIPA iso2 iso 2	§353; 353	Nuclear-interacting partner of ALK	NIPA_MOUSE|Q80YV2;NIPA_MOUSE|Q80YV2-2	http://www.phosphosite.org/proteinAction.do?id=3472&showAllSites=true	TRS*WESSSPVDRPELEAASPTTR	3	880.408	2	A	50.115	1.09642e+07	1.23397e+07	9.45055e+06	6.59465e+06	1.16519e+07	8.0226e+06	0.083474	0.251717	mouse
668	1557	4.78671e+07	A	0.345178	Zc3hc1;Zc3hc1	NIPA;NIPA iso2 iso 2	§393; 393	Nuclear-interacting partner of ALK	NIPA_MOUSE|Q80YV2;NIPA_MOUSE|Q80YV2-2	http://www.phosphosite.org/proteinAction.do?id=3472&showAllSites=true	SMGTGDSAGVEVPS*SPLRR	3	661.638	1	A	48.35	4.34397e+07	5.22945e+07	3.88807e+07	2.36245e+07	4.78671e+07	3.12526e+07	0.130805	0.345178	mouse
669	1558	4.78671e+07	A	0.345178	Zc3hc1;Zc3hc1	NIPA;NIPA iso2 iso 2	§394; 394	Nuclear-interacting partner of ALK	NIPA_MOUSE|Q80YV2;NIPA_MOUSE|Q80YV2-2	http://www.phosphosite.org/proteinAction.do?id=3472&showAllSites=true	SMGTGDSAGVEVPSS*PLRR	3	661.638	3	A	48.35	4.34397e+07	5.22945e+07	3.88807e+07	2.36245e+07	4.78671e+07	3.12526e+07	0.130805	0.345178	mouse
670	1559	2.11434e+08	A	0.0989817	Zc3hc1;Zc3hc1	NIPA;NIPA iso2 iso 2	§406, §407; 406, 407	Nuclear-interacting partner of ALK	NIPA_MOUSE|Q80YV2;NIPA_MOUSE|Q80YV2-2	http://www.phosphosite.org/proteinAction.do?id=3472&showAllSites=true	LCS*S*SSSDTSPR	2	722.247	2	A	19.94	2.03968e+08	2.189e+08	2.22957e+08	1.93789e+08	2.11434e+08	2.08373e+08	0.0499378	0.0989817	mouse
671	1560	2.11434e+08	A	0.0989817	Zc3hc1;Zc3hc1	NIPA;NIPA iso2 iso 2	§406, §408; 406, 408	Nuclear-interacting partner of ALK	NIPA_MOUSE|Q80YV2;NIPA_MOUSE|Q80YV2-2	http://www.phosphosite.org/proteinAction.do?id=3472&showAllSites=true	LCS*SS*SSDTSPR	2	722.247	3	A	19.94	2.03968e+08	2.189e+08	2.22957e+08	1.93789e+08	2.11434e+08	2.08373e+08	0.0499378	0.0989817	mouse
672	1561	2.11434e+08	A	0.0989817	Zc3hc1;Zc3hc1	NIPA;NIPA iso2 iso 2	§406, §409; 406, 409	Nuclear-interacting partner of ALK	NIPA_MOUSE|Q80YV2;NIPA_MOUSE|Q80YV2-2	http://www.phosphosite.org/proteinAction.do?id=3472&showAllSites=true	LCS*SSS*SDTSPR	2	722.247	3	A	19.94	2.03968e+08	2.189e+08	2.22957e+08	1.93789e+08	2.11434e+08	2.08373e+08	0.0499378	0.0989817	mouse
673	1564	1.98182e+09	A	0.0506513	Zc3hc1;Zc3hc1	NIPA;NIPA iso2 iso 2	§406; 406	Nuclear-interacting partner of ALK	NIPA_MOUSE|Q80YV2;NIPA_MOUSE|Q80YV2-2	http://www.phosphosite.org/proteinAction.do?id=3472&showAllSites=true	LCS*SSSSDTSPR	2	682.263	8	A	18.355	1.03657e+09	1.10546e+09	2.0528e+09	1.91084e+09	1.07102e+09	1.98182e+09	0.0454827	0.0506513	mouse
674	1565	2.50869e+07	A	0.288654	Zzef1;Zzef1	ZZEF1;ZZEF1 iso 2	§1464, §1488; §1464, §1488	Zinc finger ZZ-type and EF-hand domain-containing protein 1	ZZEF1_MOUSE|Q5SSH7;ZZEF1_MOUSE|Q5SSH7-2	http://www.phosphosite.org/proteinAction.do?id=15955&showAllSites=true	TSS*VVEEHFQGSASPTEAATPAAGDRS*PALEIQPK	4	932.174	2	A	59.2433	2.22994e+07	2.47748e+07	3.02073e+07	1.99664e+07	2.35371e+07	2.50869e+07	0.0743653	0.288654	mouse
675	1566	6.61165e+08	A	0.106848	Zzef1;Zzef1	ZZEF1;ZZEF1 iso 2	§1464; §1464	Zinc finger ZZ-type and EF-hand domain-containing protein 1	ZZEF1_MOUSE|Q5SSH7;ZZEF1_MOUSE|Q5SSH7-2	http://www.phosphosite.org/proteinAction.do?id=15955&showAllSites=true	TSS*VVEEHFQGSASPTEAATPAAGDR	3	894.727	4	A	47.235	4.77855e+08	5.55963e+08	6.92948e+08	6.29383e+08	5.16909e+08	6.61165e+08	0.106848	0.0679816	mouse
676	1567	1.58739e+07	A	0.388527	Zzef1;Zzef1	ZZEF1;ZZEF1 iso 2	§1515, §1518; §1515, §1518	Zinc finger ZZ-type and EF-hand domain-containing protein 1	ZZEF1_MOUSE|Q5SSH7;ZZEF1_MOUSE|Q5SSH7-2	http://www.phosphosite.org/proteinAction.do?id=15955&showAllSites=true	LLPSSGPCVAEVSTAEEPS*PPS*TPTR	3	942.748	3	A	63.3767	2.02349e+07	1.15128e+07	1.99941e+07	1.16179e+07	1.58739e+07	1.5806e+07	0.388527	0.374724	mouse
677	1571	7.04182e+08	A	0.08832	Zzef1;Zzef1	ZZEF1;ZZEF1 iso 2	§1515; §1515	Zinc finger ZZ-type and EF-hand domain-containing protein 1	ZZEF1_MOUSE|Q5SSH7;ZZEF1_MOUSE|Q5SSH7-2	http://www.phosphosite.org/proteinAction.do?id=15955&showAllSites=true	LLPSSGPCVAEVSTAEEPS*PPSTPTR	3	916.093	15	A	60.905	7.4816e+08	6.60205e+08	5.54001e+08	5.25207e+08	7.04182e+08	5.39604e+08	0.08832	0.0377326	mouse
678	1572	4.4153e+07	A	0.500963	Zzef1;Zzef1	ZZEF1;ZZEF1 iso 2	§1535, §1538; §1535, §1538	Zinc finger ZZ-type and EF-hand domain-containing protein 1	ZZEF1_MOUSE|Q5SSH7;ZZEF1_MOUSE|Q5SSH7-2	http://www.phosphosite.org/proteinAction.do?id=15955&showAllSites=true	LLS*FRS*MEETRPVPTVK	3	717.342	1	A	74.96	3.21952e+07	2.4405e+07	5.97935e+07	2.85125e+07	2.83001e+07	4.4153e+07	0.194647	0.500963	mouse
679	1574	42048360	A	0.1335	Zzef1;Zzef1	ZZEF1;ZZEF1 iso 2	§1538; §1538	Zinc finger ZZ-type and EF-hand domain-containing protein 1	ZZEF1_MOUSE|Q5SSH7;ZZEF1_MOUSE|Q5SSH7-2	http://www.phosphosite.org/proteinAction.do?id=15955&showAllSites=true	S*MEETRPVPTVK	3	485.23	5	A	31.1375	24427588	29520200	39807856	44288864	26973894	42048360	0.1335	0.0753549	mouse
680	1575	3.18794e+07	A	0.0681566	Zzef1;Zzef1	ZZEF1;ZZEF1 iso 2	1473, §1475; 1473, §1475	Zinc finger ZZ-type and EF-hand domain-containing protein 1	ZZEF1_MOUSE|Q5SSH7;ZZEF1_MOUSE|Q5SSH7-2	http://www.phosphosite.org/proteinAction.do?id=15955&showAllSites=true	TSSVVEEHFQGS*AS*PTEAATPAAGDR	3	921.383	2	A	49.305	2.7276e+07	2.7905e+07	3.34158e+07	3.0343e+07	2.75905e+07	3.18794e+07	0.0161218	0.0681566	mouse
681	1576	2.50869e+07	A	0.288654	Zzef1;Zzef1	ZZEF1;ZZEF1 iso 2	1473, §1488; 1473, §1488	Zinc finger ZZ-type and EF-hand domain-containing protein 1	ZZEF1_MOUSE|Q5SSH7;ZZEF1_MOUSE|Q5SSH7-2	http://www.phosphosite.org/proteinAction.do?id=15955&showAllSites=true	TSSVVEEHFQGS*ASPTEAATPAAGDRS*PALEIQPK	4	932.174	3	A	59.2433	2.22994e+07	2.47748e+07	3.02073e+07	1.99664e+07	2.35371e+07	2.50869e+07	0.0743653	0.288654	mouse
682	1578	6.61165e+08	A	0.106848	Zzef1;Zzef1	ZZEF1;ZZEF1 iso 2	1473; 1473	Zinc finger ZZ-type and EF-hand domain-containing protein 1	ZZEF1_MOUSE|Q5SSH7;ZZEF1_MOUSE|Q5SSH7-2	http://www.phosphosite.org/proteinAction.do?id=15955&showAllSites=true	TSSVVEEHFQGS*ASPTEAATPAAGDR	3	894.727	4	A	47.235	4.77855e+08	5.55963e+08	6.92948e+08	6.29383e+08	5.16909e+08	6.61165e+08	0.106848	0.0679816	mouse
683	Cell development/differentiation
684	1579	18050443	A	0.204592	Ankrd17	ANKRD17	§1936	Ankyrin repeat domain-containing protein 17	ANR17_MOUSE|Q99NH0	http://www.phosphosite.org/proteinAction.do?id=10939&showAllSites=true	ATNS*PKPHMVPR	3	472.227	3	A	18.7833	15439118	20661768	9068144	11430332	18050443	10249238	0.204592	0.16297	mouse
685	1581	1.06032e+07	A	0.0755621	Cobl;Cobl;Cobl	cordon-bleu;cordon-bleu iso 2;cordon-bleu iso 3	§941; 859; 925	Protein cordon-bleu	COBL_MOUSE|Q5NBX1;COBL_MOUSE|Q5NBX1-2;COBL_MOUSE|Q5NBX1-3	http://www.phosphosite.org/proteinAction.do?id=6718&showAllSites=true	RTS*SQYVASAIAK	2	731.359	1	A	36.76	7.43052e+06	8.26937e+06	1.11076e+07	1.00988e+07	7.84994e+06	1.06032e+07	0.0755621	0.0672755	mouse
686	1583	3.95456e+06	A	0.449633	Cobl;Cobl;Cobl	cordon-bleu;cordon-bleu iso 2;cordon-bleu iso 3	942; 860; 926	Protein cordon-bleu	COBL_MOUSE|Q5NBX1;COBL_MOUSE|Q5NBX1-2;COBL_MOUSE|Q5NBX1-3	http://www.phosphosite.org/proteinAction.do?id=6718&showAllSites=true	TSS*QYVASAIAK	2	653.308	3	A	42.46	2.46697e+06	4.76689e+06	4.40907e+06	3.50004e+06	3.61693e+06	3.95456e+06	0.449633	0.162541	mouse
687	1584	1.24263e+07	A	0.134706	Cobl;Cobl;Cobl;Cobl;Cobl	cordon-bleu;cordon-bleu iso 2;cordon-bleu iso 3;cordon-bleu iso 4;cordon-bleu iso 5	§235; §235; 219; §235; §235	Protein cordon-bleu	COBL_MOUSE|Q5NBX1;COBL_MOUSE|Q5NBX1-2;COBL_MOUSE|Q5NBX1-3;COBL_MOUSE|Q5NBX1-4;COBL_MOUSE|Q5NBX1-5	http://www.phosphosite.org/proteinAction.do?id=6718&showAllSites=true	KSS*LGNDETDK	2	637.269	3	A	14.4033	1.19733e+07	1.28792e+07	1.06354e+07	1.28747e+07	1.24263e+07	1.1755e+07	0.0515494	0.134706	mouse
688	1585	4.24149e+07	A	0.193663	Cobl;Cobl;Cobl;Cobl;Cobl	cordon-bleu;cordon-bleu iso 2;cordon-bleu iso 3;cordon-bleu iso 4;cordon-bleu iso 5	§294; 269; 278; §294; §294	Protein cordon-bleu	COBL_MOUSE|Q5NBX1;COBL_MOUSE|Q5NBX1-2;COBL_MOUSE|Q5NBX1-3;COBL_MOUSE|Q5NBX1-4;COBL_MOUSE|Q5NBX1-5	http://www.phosphosite.org/proteinAction.do?id=6718&showAllSites=true	GCVTTPNS*PSLHSR	3	531.568	2	A	28.045	2.48224e+07	2.43369e+07	4.82232e+07	3.66066e+07	2.45797e+07	4.24149e+07	0.0139671	0.193663	mouse
689	1590	3.16363e+09	A	0.220671	Cobll1;Cobll1;Cobll1;Cobll1	COBLL1;COBLL1 iso2 iso 2;COBLL1 iso2 iso 3;COBLL1 iso2 iso 4	§183; 151; 150; 151	Cordon-bleu protein-like 1	COBL1_MOUSE|Q3UMF0;COBL1_MOUSE|Q3UMF0-2;COBL1_MOUSE|Q3UMF0-3;COBL1_MOUSE|Q3UMF0-4	http://www.phosphosite.org/proteinAction.do?id=12222&showAllSites=true	KPT*PIIPEKTVR	3	486.941	9	A	67.705	2.57726e+09	2.82057e+09	3.65727e+09	2.66998e+09	2.69891e+09	3.16363e+09	0.0637458	0.220671	mouse
690	1592	7.74988e+07	A	0.173649	Cobll1;Cobll1;Cobll1;Cobll1	COBLL1;COBLL1 iso2 iso 2;COBLL1 iso2 iso 3;COBLL1 iso2 iso 4	§319; 287; 286; 287	Cordon-bleu protein-like 1	COBL1_MOUSE|Q3UMF0;COBL1_MOUSE|Q3UMF0-2;COBL1_MOUSE|Q3UMF0-3;COBL1_MOUSE|Q3UMF0-4	http://www.phosphosite.org/proteinAction.do?id=12222&showAllSites=true	SNT*ISKPYISNTLPSDAPK	3	705.012	5	A	53.3625	5.34809e+07	6.23444e+07	8.70147e+07	6.79828e+07	5.79127e+07	7.74988e+07	0.108222	0.173649	mouse
691	1593	1.20633e+08	A	0.142929	Cobll1;Cobll1;Cobll1;Cobll1	COBLL1;COBLL1 iso2 iso 2;COBLL1 iso2 iso 3;COBLL1 iso2 iso 4	§359; 327; 326; 327	Cordon-bleu protein-like 1	COBL1_MOUSE|Q3UMF0;COBL1_MOUSE|Q3UMF0-2;COBL1_MOUSE|Q3UMF0-3;COBL1_MOUSE|Q3UMF0-4	http://www.phosphosite.org/proteinAction.do?id=12222&showAllSites=true	RAS*CVER	2	479.202	4	A	12.61	1.08441e+08	1.32825e+08	1.00255e+08	1.026e+08	1.20633e+08	1.01428e+08	0.142929	0.0163471	mouse
692	1594	10552584	A	0.102846	Cobll1;Cobll1;Cobll1;Cobll1	COBLL1;COBLL1 iso2 iso 2;COBLL1 iso2 iso 3;COBLL1 iso2 iso 4	§384; 352; 351; 352	Cordon-bleu protein-like 1	COBL1_MOUSE|Q3UMF0;COBL1_MOUSE|Q3UMF0-2;COBL1_MOUSE|Q3UMF0-3;COBL1_MOUSE|Q3UMF0-4	http://www.phosphosite.org/proteinAction.do?id=12222&showAllSites=true	TGS*LQLSSTSIGTSSLK	2	873.93	4	A	60.89	7180999	6935168	9785168	11320000	7.05808e+06	10552584	0.0246283	0.102846	mouse
693	1595	10552584	A	0.102846	Cobll1;Cobll1;Cobll1;Cobll1	COBLL1;COBLL1 iso2 iso 2;COBLL1 iso2 iso 3;COBLL1 iso2 iso 4	§394; 362; 361; 362	Cordon-bleu protein-like 1	COBL1_MOUSE|Q3UMF0;COBL1_MOUSE|Q3UMF0-2;COBL1_MOUSE|Q3UMF0-3;COBL1_MOUSE|Q3UMF0-4	http://www.phosphosite.org/proteinAction.do?id=12222&showAllSites=true	TGSLQLSSTSIGT*SSLK	2	873.93	1	A	60.89	7180999	6935168	9785168	11320000	7.05808e+06	10552584	0.0246283	0.102846	mouse
694	1597	3.38393e+08	A	0.121223	Cobll1;Cobll1;Cobll1;Cobll1	COBLL1;COBLL1 iso2 iso 2;COBLL1 iso2 iso 3;COBLL1 iso2 iso 4	§896; 864; 825; 826	Cordon-bleu protein-like 1	COBL1_MOUSE|Q3UMF0;COBL1_MOUSE|Q3UMF0-2;COBL1_MOUSE|Q3UMF0-3;COBL1_MOUSE|Q3UMF0-4	http://www.phosphosite.org/proteinAction.do?id=12222&showAllSites=true	TLS*SPTGTETNPPK	2	755.345	7	A	32.3175	2.18189e+08	2.59101e+08	3.33677e+08	3.43109e+08	2.38645e+08	3.38393e+08	0.121223	0.0197085	mouse
695	1598	3.38393e+08	A	0.121223	Cobll1;Cobll1;Cobll1;Cobll1	COBLL1;COBLL1 iso2 iso 2;COBLL1 iso2 iso 3;COBLL1 iso2 iso 4	§897; 865; 826; 827	Cordon-bleu protein-like 1	COBL1_MOUSE|Q3UMF0;COBL1_MOUSE|Q3UMF0-2;COBL1_MOUSE|Q3UMF0-3;COBL1_MOUSE|Q3UMF0-4	http://www.phosphosite.org/proteinAction.do?id=12222&showAllSites=true	TLSS*PTGTETNPPK	2	755.345	1	A	32.3175	2.18189e+08	2.59101e+08	3.33677e+08	3.43109e+08	2.38645e+08	3.38393e+08	0.121223	0.0197085	mouse
696	1599	2.58222e+07	A	0.180905	Gprin1	GRIN1	§219	G protein-regulated inducer of neurite outgrowth 1	GRIN1_MOUSE|Q3UNH4	http://www.phosphosite.org/proteinAction.do?id=19627&showAllSites=true	ERPGS*TGEGDLVSLR	2	826.886	3	A	50.15	2.04571e+07	2.50594e+07	2.91254e+07	2.25191e+07	2.27582e+07	2.58222e+07	0.142997	0.180905	mouse
697	1601	2.74139e+07	A	0.217736	Gprin1	GRIN1	§220	G protein-regulated inducer of neurite outgrowth 1	GRIN1_MOUSE|Q3UNH4	http://www.phosphosite.org/proteinAction.do?id=19627&showAllSites=true	ERPGST*GEGDLVSLR	3	551.593	5	A	50.175	1.59316e+07	1.49265e+07	3.16346e+07	2.31932e+07	1.5429e+07	2.74139e+07	0.046061	0.217736	mouse
698	1602	40739974	A	0.337407	Ndrg1	NDRG1	§328, §330	Protein NDRG1	NDRG1_MOUSE|Q62433	http://www.phosphosite.org/proteinAction.do?id=6545&showAllSites=true	SRT*AS*GSSVTSLEGTR	2	878.369	3	A	38.84	26988642	43901884	37450156	44029792	35445263	40739974	0.337407	0.1142	mouse
699	1603	4.51403e+07	A	0.134013	Ndrg1	NDRG1	§328, §332	Protein NDRG1	NDRG1_MOUSE|Q62433	http://www.phosphosite.org/proteinAction.do?id=6545&showAllSites=true	SRT*ASGS*SVTSLEGTR	3	585.915	4	A	38.9	3.00749e+07	3.42777e+07	4.94179e+07	4.08627e+07	3.21763e+07	4.51403e+07	0.0923608	0.134013	mouse
700	1604	40739974	A	0.337407	Ndrg1	NDRG1	§328, §335	Protein NDRG1	NDRG1_MOUSE|Q62433	http://www.phosphosite.org/proteinAction.do?id=6545&showAllSites=true	SRT*ASGSSVT*SLEGTR	2	878.369	1	A	38.84	26988642	43901884	37450156	44029792	35445263	40739974	0.337407	0.1142	mouse
701	1606	5.14984e+08	A	0.0245249	Ndrg1	NDRG1	§330	Protein NDRG1	NDRG1_MOUSE|Q62433	http://www.phosphosite.org/proteinAction.do?id=6545&showAllSites=true	TAS*GSSVTSLEGTR	2	716.819	7	A	40.785	3.45758e+08	3.54936e+08	5.23915e+08	5.06053e+08	3.50347e+08	5.14984e+08	0.018525	0.0245249	mouse
702	1607	5.31242e+07	A	0.11467	Ndrg1	NDRG1	§330, §335	Protein NDRG1	NDRG1_MOUSE|Q62433	http://www.phosphosite.org/proteinAction.do?id=6545&showAllSites=true	TAS*GSSVT*SLEGTR	2	756.803	2	A	39.09	3.07713e+07	3.62017e+07	5.12498e+07	5.49985e+07	3.34865e+07	5.31242e+07	0.11467	0.0498961	mouse
703	1608	5.31242e+07	A	0.11467	Ndrg1	NDRG1	§330, §336	Protein NDRG1	NDRG1_MOUSE|Q62433	http://www.phosphosite.org/proteinAction.do?id=6545&showAllSites=true	TAS*GSSVTS*LEGTR	2	756.803	1	A	39.09	3.07713e+07	3.62017e+07	5.12498e+07	5.49985e+07	3.34865e+07	5.31242e+07	0.11467	0.0498961	mouse
704	1609	5.31242e+07	A	0.11467	Ndrg1	NDRG1	§332, §333	Protein NDRG1	NDRG1_MOUSE|Q62433	http://www.phosphosite.org/proteinAction.do?id=6545&showAllSites=true	TASGS*S*VTSLEGTR	2	756.803	3	A	39.09	3.07713e+07	3.62017e+07	5.12498e+07	5.49985e+07	3.34865e+07	5.31242e+07	0.11467	0.0498961	mouse
705	1610	5.31242e+07	A	0.11467	Ndrg1	NDRG1	§332, §335	Protein NDRG1	NDRG1_MOUSE|Q62433	http://www.phosphosite.org/proteinAction.do?id=6545&showAllSites=true	TASGS*SVT*SLEGTR	2	756.803	1	A	39.09	3.07713e+07	3.62017e+07	5.12498e+07	5.49985e+07	3.34865e+07	5.31242e+07	0.11467	0.0498961	mouse
706	1611	5.31242e+07	A	0.11467	Ndrg1	NDRG1	§333, §335	Protein NDRG1	NDRG1_MOUSE|Q62433	http://www.phosphosite.org/proteinAction.do?id=6545&showAllSites=true	TASGSS*VT*SLEGTR	2	756.803	2	A	39.09	3.07713e+07	3.62017e+07	5.12498e+07	5.49985e+07	3.34865e+07	5.31242e+07	0.11467	0.0498961	mouse
707	1612	4.30437e+07	A	0.265422	Ndrg1	NDRG1	§340	Protein NDRG1	NDRG1_MOUSE|Q62433	http://www.phosphosite.org/proteinAction.do?id=6545&showAllSites=true	TASGSSVTSLEGT*RSR	3	559.26	1	A	30.17	2.37994e+07	3.47968e+07	4.78447e+07	3.82428e+07	2.92981e+07	4.30437e+07	0.265422	0.157735	mouse
708	1613	1.06566e+07	A	0.410711	Ndrg1	NDRG1	§342	Protein NDRG1	NDRG1_MOUSE|Q62433	http://www.phosphosite.org/proteinAction.do?id=6545&showAllSites=true	TASGSSVTSLEGTRS*R	2	838.386	1	A	30.84	5.82258e+06	1.05887e+07	9.25428e+06	1.20588e+07	8.20564e+06	1.06566e+07	0.410711	0.186094	mouse
709	1614	1.70405e+07	A	0.0573034	Ndrg1	NDRG1	§344, §346	Protein NDRG1	NDRG1_MOUSE|Q62433	http://www.phosphosite.org/proteinAction.do?id=6545&showAllSites=true	SRS*HT*SEGPR	3	425.162	1	A	11.8	1.66902e+07	1.73907e+07	1.51743e+07	1.39925e+07	1.70405e+07	1.45834e+07	0.02907	0.0573034	mouse
710	1615	1.94771e+07	A	0.3503	Ndrg1	NDRG1	§346	Protein NDRG1	NDRG1_MOUSE|Q62433	http://www.phosphosite.org/proteinAction.do?id=6545&showAllSites=true	SHT*SEGPR	2	475.69	3	A	11.46	1.46526e+07	2.43015e+07	1.27027e+07	1.77871e+07	1.94771e+07	1.52449e+07	0.3503	0.235833	mouse
711	1617	1.23885e+07	A	0.247039	Ndrg1	NDRG1	§375	Protein NDRG1	NDRG1_MOUSE|Q62433	http://www.phosphosite.org/proteinAction.do?id=6545&showAllSites=true	LNIT*PNSGATGNNAGPK	2	853.399	4	A	37.0675	1.02244e+07	1.45525e+07	9.09799e+06	1.26147e+07	1.23885e+07	1.08564e+07	0.247039	0.229056	mouse
712	1619	3.05088e+08	A	0.189674	Ndrg3	NDRG3	§329, §332	Protein NDRG3	NDRG3_MOUSE|Q9QYF9	http://www.phosphosite.org/proteinAction.do?id=9302&showAllSites=true	SRT*HST*SSSIGSGESPFSR	3	709.623	3	A	39.62	2.17188e+08	2.31926e+08	3.46006e+08	2.64169e+08	2.24557e+08	3.05088e+08	0.0464077	0.189674	mouse
713	1620	3.05088e+08	A	0.189674	Ndrg3	NDRG3	§329, §333	Protein NDRG3	NDRG3_MOUSE|Q9QYF9	http://www.phosphosite.org/proteinAction.do?id=9302&showAllSites=true	SRT*HSTS*SSIGSGESPFSR	3	709.623	1	A	39.62	2.17188e+08	2.31926e+08	3.46006e+08	2.64169e+08	2.24557e+08	3.05088e+08	0.0464077	0.189674	mouse
714	1621	3.05088e+08	A	0.189674	Ndrg3	NDRG3	§329, §334	Protein NDRG3	NDRG3_MOUSE|Q9QYF9	http://www.phosphosite.org/proteinAction.do?id=9302&showAllSites=true	SRT*HSTSS*SIGSGESPFSR	3	709.623	1	A	39.62	2.17188e+08	2.31926e+08	3.46006e+08	2.64169e+08	2.24557e+08	3.05088e+08	0.0464077	0.189674	mouse
715	1627	2.92891e+09	A	0.169982	Ndrg3	NDRG3	§331	Protein NDRG3	NDRG3_MOUSE|Q9QYF9	http://www.phosphosite.org/proteinAction.do?id=9302&showAllSites=true	THS*TSSSIGSGESPFSR	3	601.923	18	A	41.735	2.13522e+09	1.95414e+09	3.28095e+09	2.57687e+09	2.04468e+09	2.92891e+09	0.0626201	0.169982	mouse
716	1628	2.13469e+08	A	0.187937	Ndrg3	NDRG3	§331, §332	Protein NDRG3	NDRG3_MOUSE|Q9QYF9	http://www.phosphosite.org/proteinAction.do?id=9302&showAllSites=true	THS*T*SSSIGSGESPFSR	2	942.364	1	A	45.19	1.67904e+08	2.19369e+08	2.37199e+08	1.89738e+08	1.93637e+08	2.13469e+08	0.187937	0.157213	mouse
717	1631	2.13469e+08	A	0.187937	Ndrg3	NDRG3	§331, §334	Protein NDRG3	NDRG3_MOUSE|Q9QYF9	http://www.phosphosite.org/proteinAction.do?id=9302&showAllSites=true	THS*TSS*SIGSGESPFSR	2	942.364	7	A	45.19	1.67904e+08	2.19369e+08	2.37199e+08	1.89738e+08	1.93637e+08	2.13469e+08	0.187937	0.157213	mouse
718	1637	3.86351e+08	A	0.282592	Ndrg3	NDRG3	§331, §335	Protein NDRG3	NDRG3_MOUSE|Q9QYF9	http://www.phosphosite.org/proteinAction.do?id=9302&showAllSites=true	THS*TSSS*IGSGESPFSR	3	628.578	12	A	42.02	2.82327e+08	3.38633e+08	4.63553e+08	3.09149e+08	3.1048e+08	3.86351e+08	0.128237	0.282592	mouse
719	1640	2.92891e+09	A	0.169982	Ndrg3	NDRG3	§332	Protein NDRG3	NDRG3_MOUSE|Q9QYF9	http://www.phosphosite.org/proteinAction.do?id=9302&showAllSites=true	THST*SSSIGSGESPFSR	3	601.923	3	A	41.735	2.13522e+09	1.95414e+09	3.28095e+09	2.57687e+09	2.04468e+09	2.92891e+09	0.0626201	0.169982	mouse
720	1641	3.86351e+08	A	0.282592	Ndrg3	NDRG3	§332, §335	Protein NDRG3	NDRG3_MOUSE|Q9QYF9	http://www.phosphosite.org/proteinAction.do?id=9302&showAllSites=true	THST*SSS*IGSGESPFSR	3	628.578	1	A	42.02	2.82327e+08	3.38633e+08	4.63553e+08	3.09149e+08	3.1048e+08	3.86351e+08	0.128237	0.282592	mouse
721	1645	2.92891e+09	A	0.169982	Ndrg3	NDRG3	§333	Protein NDRG3	NDRG3_MOUSE|Q9QYF9	http://www.phosphosite.org/proteinAction.do?id=9302&showAllSites=true	THSTS*SSIGSGESPFSR	3	601.923	10	A	41.735	2.13522e+09	1.95414e+09	3.28095e+09	2.57687e+09	2.04468e+09	2.92891e+09	0.0626201	0.169982	mouse
722	1646	3.05088e+08	A	0.189674	Ndrg3	NDRG3	§333, §334	Protein NDRG3	NDRG3_MOUSE|Q9QYF9	http://www.phosphosite.org/proteinAction.do?id=9302&showAllSites=true	SRTHSTS*S*SIGSGESPFSR	3	709.623	7	A	39.62	2.17188e+08	2.31926e+08	3.46006e+08	2.64169e+08	2.24557e+08	3.05088e+08	0.0464077	0.189674	mouse
723	1649	3.86351e+08	A	0.282592	Ndrg3	NDRG3	§333, §335	Protein NDRG3	NDRG3_MOUSE|Q9QYF9	http://www.phosphosite.org/proteinAction.do?id=9302&showAllSites=true	THSTS*SS*IGSGESPFSR	3	628.578	4	A	42.02	2.82327e+08	3.38633e+08	4.63553e+08	3.09149e+08	3.1048e+08	3.86351e+08	0.128237	0.282592	mouse
724	1652	2.92891e+09	A	0.169982	Ndrg3	NDRG3	§334	Protein NDRG3	NDRG3_MOUSE|Q9QYF9	http://www.phosphosite.org/proteinAction.do?id=9302&showAllSites=true	THSTSS*SIGSGESPFSR	3	601.923	5	A	41.735	2.13522e+09	1.95414e+09	3.28095e+09	2.57687e+09	2.04468e+09	2.92891e+09	0.0626201	0.169982	mouse
725	1653	2.13469e+08	A	0.187937	Ndrg3	NDRG3	§334, §335	Protein NDRG3	NDRG3_MOUSE|Q9QYF9	http://www.phosphosite.org/proteinAction.do?id=9302&showAllSites=true	THSTSS*S*IGSGESPFSR	2	942.364	1	A	45.19	1.67904e+08	2.19369e+08	2.37199e+08	1.89738e+08	1.93637e+08	2.13469e+08	0.187937	0.157213	mouse
726	1654	2.92891e+09	A	0.169982	Ndrg3	NDRG3	§335	Protein NDRG3	NDRG3_MOUSE|Q9QYF9	http://www.phosphosite.org/proteinAction.do?id=9302&showAllSites=true	THSTSSS*IGSGESPFSR	3	601.923	1	A	41.735	2.13522e+09	1.95414e+09	3.28095e+09	2.57687e+09	2.04468e+09	2.92891e+09	0.0626201	0.169982	mouse
727	1656	1.27585e+08	A	0.158959	Ndrg3	NDRG3	§348	Protein NDRG3	NDRG3_MOUSE|Q9QYF9	http://www.phosphosite.org/proteinAction.do?id=9302&showAllSites=true	SVT*SNQSDGTQESCESPDVLDR	3	831.002	4	A	43.1425	1.13244e+08	1.41925e+08	1.34232e+08	1.07713e+08	1.27585e+08	1.20972e+08	0.158959	0.155009	mouse
728	1657	1.02404e+08	A	0.193845	Ndrg3	NDRG3	§352	Protein NDRG3	NDRG3_MOUSE|Q9QYF9	http://www.phosphosite.org/proteinAction.do?id=9302&showAllSites=true	SVTSNQS*DGTQESCESPDVLDR	2	1246	3	A	46.775	8.83676e+07	1.1644e+08	9.31976e+07	7.74197e+07	1.02404e+08	8.53087e+07	0.193845	0.13078	mouse
729	1660	1.27585e+08	A	0.158959	Ndrg3	NDRG3	§355	Protein NDRG3	NDRG3_MOUSE|Q9QYF9	http://www.phosphosite.org/proteinAction.do?id=9302&showAllSites=true	SVTSNQSDGT*QESCESPDVLDR	3	831.002	3	A	43.1425	1.13244e+08	1.41925e+08	1.34232e+08	1.07713e+08	1.27585e+08	1.20972e+08	0.158959	0.155009	mouse
730	1661	1.27585e+08	A	0.158959	Ndrg3	NDRG3	§358	Protein NDRG3	NDRG3_MOUSE|Q9QYF9	http://www.phosphosite.org/proteinAction.do?id=9302&showAllSites=true	SVTSNQSDGTQES*CESPDVLDR	3	831.002	2	A	43.1425	1.13244e+08	1.41925e+08	1.34232e+08	1.07713e+08	1.27585e+08	1.20972e+08	0.158959	0.155009	mouse
731	1663	1.27585e+08	A	0.158959	Ndrg3	NDRG3	§361	Protein NDRG3	NDRG3_MOUSE|Q9QYF9	http://www.phosphosite.org/proteinAction.do?id=9302&showAllSites=true	SVTSNQSDGTQESCES*PDVLDR	3	831.002	8	A	43.1425	1.13244e+08	1.41925e+08	1.34232e+08	1.07713e+08	1.27585e+08	1.20972e+08	0.158959	0.155009	mouse
732	1664	2.6145e+07	A	0.275578	Ndrg3	NDRG3	§374	Protein NDRG3	NDRG3_MOUSE|Q9QYF9	http://www.phosphosite.org/proteinAction.do?id=9302&showAllSites=true	HQTMEVS*C	2	536.185	4	A	25.385	2.38477e+07	2.84423e+07	2.9412e+07	1.98188e+07	2.6145e+07	2.46154e+07	0.124262	0.275578	mouse
733	1666	1.27585e+08	A	0.158959	Ndrg3	NDRG3	349	Protein NDRG3	NDRG3_MOUSE|Q9QYF9	http://www.phosphosite.org/proteinAction.do?id=9302&showAllSites=true	SVTS*NQSDGTQESCESPDVLDR	3	831.002	3	A	43.1425	1.13244e+08	1.41925e+08	1.34232e+08	1.07713e+08	1.27585e+08	1.20972e+08	0.158959	0.155009	mouse
734	1667	4.10884e+07	A	0.283248	Nyap2;Nyap2;Nyap2	NYAP2;NYAP2 iso5 iso 3;NYAP2 iso4 iso 4	178, §184; 178, 184; 178, 184	Neuronal tyrosine-phosphorylated phosphoinositide-3-kinase adapter 2	NYAP2_MOUSE|Q8BM65;NYAP2_MOUSE|Q8BM65-3;NYAP2_MOUSE|Q8BM65-4	http://www.phosphosite.org/proteinAction.do?id=7159&showAllSites=true	KFT*VPASHS*PPR	3	495.221	1	A	17.64	2.88411e+07	4.32875e+07	4.28471e+07	3.93298e+07	3.60643e+07	4.10884e+07	0.283248	0.0605307	mouse
735	1669	3.00466e+07	A	0.0602628	Rbpj	RBPJ	8	Recombining binding protein suppressor of hairless	SUH_MOUSE|P31266	http://www.phosphosite.org/proteinAction.do?id=3722759&showAllSites=true	PSGFPQS*PR	2	526.732	6	A	32.6475	2.87662e+07	3.13269e+07	2.04533e+07	1.95625e+07	3.00466e+07	2.00079e+07	0.0602628	0.0314821	mouse
736	1672	9.24979e+07	A	0.151844	Robo2	ROBO2	§1270	Roundabout homolog 2	ROBO2_MOUSE|Q7TPD3	http://www.phosphosite.org/proteinAction.do?id=4845812&showAllSites=true	QRPTS*PFSTDSNTSAAQNQSQRPRPTK	4	767.614	7	A	28.6125	6.34722e+07	7.55402e+07	1.02429e+08	8.25664e+07	6.95062e+07	9.24979e+07	0.122771	0.151844	mouse
737	1674	1.59302e+07	A	0.294178	Robo2	ROBO2	1269	Roundabout homolog 2	ROBO2_MOUSE|Q7TPD3	http://www.phosphosite.org/proteinAction.do?id=4845812&showAllSites=true	QRPT*SPFSTDSNTSAAQNQSQRPR	4	686.065	3	A	31.2067	7.1565e+06	8.85739e+06	1.92439e+07	1.26165e+07	8.00695e+06	1.59302e+07	0.150209	0.294178	mouse
738	1676	5.38668e+07	A	0.100019	Robo2	ROBO2	1273	Roundabout homolog 2	ROBO2_MOUSE|Q7TPD3	http://www.phosphosite.org/proteinAction.do?id=4845812&showAllSites=true	QRPTSPFS*TDSNTSAAQNQSQR	3	830.033	2	A	30.87	3.93618e+07	4.22601e+07	5.00571e+07	5.76765e+07	4.08109e+07	5.38668e+07	0.0502171	0.100019	mouse
739	1678	4.37088e+07	A	0.248809	Rufy3;Rufy3	RUFY3;RUFY3 iso1	§27; 27	Protein RUFY3	RUFY3_MOUSE|Q9D394-2;RUFY3_MOUSE|Q9D394-4	http://www.phosphosite.org/proteinAction.do?id=17406&showAllSites=true	RPS*EPLEPR	2	580.777	7	A	26.485	3.60189e+07	5.13987e+07	2.66743e+07	2.81024e+07	4.37088e+07	2.73884e+07	0.248809	0.0368708	mouse
740	1685	6.82754e+07	A	0.152989	Skt;Skt;Skt;Skt;Skt	SKT;SKT iso2 iso 2;SKT iso2 iso 3;SKT iso2 iso 4;SKT iso2 iso 8	§1843; 1526; 1249; 1238; 937	Sickle tail protein	SKT_MOUSE|A2AQ25;SKT_MOUSE|A2AQ25-2;SKT_MOUSE|A2AQ25-3;SKT_MOUSE|A2AQ25-4;SKT_MOUSE|A2AQ25-8	http://www.phosphosite.org/proteinAction.do?id=8252&showAllSites=true	SSSLPSASGDSSNLPNAPATKPSIASTPLS*PQAGR	4	858.418	19	A	54.52	5.97233e+07	4.8063e+07	6.7642e+07	6.89087e+07	5.38932e+07	6.82754e+07	0.152989	0.0131192	mouse
741	1687	2.07019e+07	A	0.152415	Skt;Skt;Skt;Skt;Skt	SKT;SKT iso2 iso 3;SKT iso2 iso 4;SKT iso2 iso 8;SKT iso2 iso 7	§68; 68; 68; 68; 68	Sickle tail protein	SKT_MOUSE|A2AQ25;SKT_MOUSE|A2AQ25-3;SKT_MOUSE|A2AQ25-4;SKT_MOUSE|A2AQ25-8;SKT_MOUSE|A2AQ25-7	http://www.phosphosite.org/proteinAction.do?id=8252&showAllSites=true	RHT*LGGPR	3	325.162	5	A	13.58	1.36292e+07	1.34403e+07	2.2933e+07	1.84708e+07	1.35348e+07	2.07019e+07	0.00986804	0.152415	mouse
742	1688	4.20707e+06	A	0.719228	Skt;Skt;Skt;Skt;Skt;Skt;Skt;Skt	SKT;SKT iso2 iso 2;SKT iso2 iso 3;SKT iso2 iso 4;SKT iso2 iso 5;SKT iso2 iso 6;SKT iso2 iso 8;SKT iso2 iso 9	§361; 79; 361; 361; 79; 79; 361; 79	Sickle tail protein	SKT_MOUSE|A2AQ25;SKT_MOUSE|A2AQ25-2;SKT_MOUSE|A2AQ25-3;SKT_MOUSE|A2AQ25-4;SKT_MOUSE|A2AQ25-5;SKT_MOUSE|A2AQ25-6;SKT_MOUSE|A2AQ25-8;SKT_MOUSE|A2AQ25-9	http://www.phosphosite.org/proteinAction.do?id=8252&showAllSites=true	SIS*PSPSAILER	2	668.829	1	A	63.5	1.06902e+06	3.28165e+06	4.67631e+06	3.73784e+06	2.17534e+06	4.20707e+06	0.719228	0.157735	mouse
743	1689	4.95125e+07	A	0.0638147	Tanc2;Tanc2	TANC2;TANC2 iso 2	§1549; 1559	Protein TANC2	TANC2_MOUSE|A2A690;TANC2_MOUSE|A2A690-2	http://www.phosphosite.org/proteinAction.do?id=11097&showAllSites=true	AS*PPAESMSVYR	2	687.792	4	A	46.2875	4.58983e+07	5.02362e+07	5.10538e+07	4.79712e+07	4.80672e+07	4.95125e+07	0.0638147	0.0440229	mouse
744	1691	5.48933e+07	A	0.424938	Tanc2;Tanc2	TANC2;TANC2 iso 2	§1583; 1593	Protein TANC2	TANC2_MOUSE|A2A690;TANC2_MOUSE|A2A690-2	http://www.phosphosite.org/proteinAction.do?id=11097&showAllSites=true	YQQETNVSQLPGRPKS*PLSK	4	585.045	8	A	38.845	3.53081e+07	4.22551e+07	7.13874e+07	3.83991e+07	3.87816e+07	5.48933e+07	0.126664	0.424938	mouse
745	1693	4.28698e+08	A	0.0676634	Thoc5	FMIP	§328	THO complex subunit 5 homolog	THOC5_MOUSE|Q8BKT7	http://www.phosphosite.org/proteinAction.do?id=6131&showAllSites=true	RPT*LGVQLDDK	2	661.329	37	A	41.965	4.13608e+08	4.43788e+08	4.35037e+08	3.95309e+08	4.28698e+08	4.15173e+08	0.0497787	0.0676634	mouse
746	1704	1.10965e+06	A	0.52801	Twist1;Twist2	TWIST1;TWIST2	§127; 81	Twist-related protein 1	TWST1_MOUSE|P26687;TWST2_MOUSE|Q9D030	http://www.phosphosite.org/proteinAction.do?id=8227&showAllSites=true	TQS*LNEAFAALR	2	700.832	4	A	78.5425	1.49979e+06	719521	1.29123e+06	589167	1.10965e+06	940200	0.49721	0.52801	mouse
747	Chaperone
748	1705	1.69408e+07	A	0.290852	Bcs1l	BCS1L	169	Mitochondrial chaperone BCS1	BCS1_MOUSE|Q9CZP5	http://www.phosphosite.org/proteinAction.do?id=8397&showAllSites=true	TVMY*TAVGSEWR	2	740.321	1	A	51.94	1.77565e+07	1.61251e+07	1.83027e+07	1.20585e+07	1.69408e+07	1.51806e+07	0.0680944	0.290852	mouse
749	1708	3.71083e+07	A	0.141117	Hspa4l;Hspa4l	HSPA4L;HSPA4L iso 2	§593; 572	Heat shock 70 kDa protein 4L	HS74L_MOUSE|P48722;HS74L_MOUSE|P48722-2	http://www.phosphosite.org/proteinAction.do?id=12544&showAllSites=true	QLT*QDLLNSYIENEGK	2	972.951	9	A	84.845	2.76771e+07	2.37604e+07	4.08112e+07	3.34055e+07	2.57187e+07	3.71083e+07	0.107686	0.141117	mouse
750	1710	2.49768e+08	A	0.15851	Hspb1;Hspb1;Hspb1	HSP27;HSP27 iso 2;HSP27 iso 3	§86; 74; 52	Heat shock protein beta-1	HSPB1_MOUSE|P14602;HSPB1_MOUSE|P14602-2;HSPB1_MOUSE|P14602-3	http://www.phosphosite.org/proteinAction.do?id=1682&showAllSites=true	QLS*SGVSEIR	2	578.274	2	A	44.125	2.21528e+08	2.77456e+08	2.73073e+08	2.26464e+08	2.49492e+08	2.49768e+08	0.15851	0.131952	mouse
751	1711	2.65703e+07	A	0.247543	Hsph1;Hsph1	HSP105;HSP105 iso 2	486; 486	Heat shock protein 105 kDa	HS105_MOUSE|Q61699;HS105_MOUSE|Q61699-2	http://www.phosphosite.org/proteinAction.do?id=2296&showAllSites=true	VNT*HGIFTISTASM#VEK	3	644.304	7	A	63.6525	2.77713e+07	1.94974e+07	2.90858e+07	2.40548e+07	2.36344e+07	2.65703e+07	0.247543	0.133888	mouse
752	1713	3.6204e+07	A	0.237469	Sacs;Sacs;Sacs	SACS;SACS iso 2;SACS iso 3	§2511; 1759; 2508	Sacsin	SACS_MOUSE|Q9JLC8;SACS_MOUSE|Q9JLC8-2;SACS_MOUSE|Q9JLC8-3	http://www.phosphosite.org/proteinAction.do?id=8389&showAllSites=true	Y*ASNICFTALGTEFGQK	2	993.937	1	A	91.2133	3.76149e+07	3.09574e+07	4.22832e+07	3.01248e+07	3.42862e+07	3.6204e+07	0.137304	0.237469	mouse
753	1714	3.6204e+07	A	0.237469	Sacs;Sacs;Sacs	SACS;SACS iso 2;SACS iso 3	§2513; 1761; 2510	Sacsin	SACS_MOUSE|Q9JLC8;SACS_MOUSE|Q9JLC8-2;SACS_MOUSE|Q9JLC8-3	http://www.phosphosite.org/proteinAction.do?id=8389&showAllSites=true	YAS*NICFTALGTEFGQK	2	993.937	3	A	91.2133	3.76149e+07	3.09574e+07	4.22832e+07	3.01248e+07	3.42862e+07	3.6204e+07	0.137304	0.237469	mouse
754	1715	1.24169e+07	A	0.392025	Sacs;Sacs;Sacs	SACS;SACS iso 2;SACS iso 3	§2518; 1766; 2515	Sacsin	SACS_MOUSE|Q9JLC8;SACS_MOUSE|Q9JLC8-2;SACS_MOUSE|Q9JLC8-3	http://www.phosphosite.org/proteinAction.do?id=8389&showAllSites=true	YASNICFT*ALGTEFGQK	3	662.96	1	A	91.24	1.11451e+07	6.30727e+06	1.39009e+07	1.0933e+07	8.7262e+06	1.24169e+07	0.392025	0.169016	mouse
755	1716	6635196	A	0.216881	Sacs;Sacs;Sacs	SACS;SACS iso 2;SACS iso 3	§4265; 3513; 4262	Sacsin	SACS_MOUSE|Q9JLC8;SACS_MOUSE|Q9JLC8-2;SACS_MOUSE|Q9JLC8-3	http://www.phosphosite.org/proteinAction.do?id=8389&showAllSites=true	DSAPTTPT*SPTEFLTPGLR	2	1034.49	1	A	82.26	7652756	5617636	5516465	5945015	6635196	5730740	0.216881	0.0528781	mouse
756	1719	3.13992e+08	A	0.161306	Sgta;Sgta	SGTA;SGTA iso 2	§307; 306	Small glutamine-rich tetratricopeptide repeat-containing protein alpha	SGTA_MOUSE|Q8BJU0;SGTA_MOUSE|Q8BJU0-2	http://www.phosphosite.org/proteinAction.do?id=6059&showAllSites=true	TPS*ASHEEQQE	2	661.749	7	A	15.08	2.78178e+08	3.49806e+08	2.80495e+08	3.0758e+08	3.13992e+08	2.94037e+08	0.161306	0.0651345	mouse
757	1720	3.13992e+08	A	0.161306	Sgta;Sgta	SGTA;SGTA iso 2	§309; 308	Small glutamine-rich tetratricopeptide repeat-containing protein alpha	SGTA_MOUSE|Q8BJU0;SGTA_MOUSE|Q8BJU0-2	http://www.phosphosite.org/proteinAction.do?id=6059&showAllSites=true	TPSAS*HEEQQE	2	661.749	1	A	15.08	2.78178e+08	3.49806e+08	2.80495e+08	3.0758e+08	3.13992e+08	2.94037e+08	0.161306	0.0651345	mouse
758	1721	6.57065e+07	A	0.159562	Tomm34;Tomm34	TOMM34;TOMM34 iso2 iso 2	93; 93	Mitochondrial import receptor subunit TOM34	TOM34_MOUSE|Q9CYG7;TOM34_MOUSE|Q9CYG7-2	http://www.phosphosite.org/proteinAction.do?id=8123&showAllSites=true	RAS*AYEALEK	2	609.282	1	A	33.74	3.1103e+07	3.90141e+07	7.0534e+07	6.08791e+07	3.50585e+07	6.57065e+07	0.159562	0.103902	mouse
759	Chromatin, DNA-binding, DNA repair or DNA replication protein
760	1724	4.36871e+07	A	0.194013	Hjurp;Hjurp;Hjurp	FLEG1;FLEG1 iso 2;FLEG1 iso 3	§602; 585; 526	Holliday junction recognition protein	HJURP_MOUSE|Q6PG16;HJURP_MOUSE|Q6PG16-2;HJURP_MOUSE|Q6PG16-3	http://www.phosphosite.org/proteinAction.do?id=6036900&showAllSites=true	RLNPDS*PQQSSQK	3	522.242	11	A	17.4275	3.31204e+07	3.97916e+07	4.96804e+07	3.76937e+07	3.6456e+07	4.36871e+07	0.129397	0.194013	mouse
761	1725	1.09545e+07	A	0.249333	Mcm3	MCM3	§159	DNA replication licensing factor MCM3	MCM3_MOUSE|P25206	http://www.phosphosite.org/proteinAction.do?id=3160&showAllSites=true	RY*SDLTTLVAFPSSSVYPTK	3	771.379	2	A	87.715	1.03981e+07	8.42206e+06	1.28858e+07	9.02317e+06	9.41007e+06	1.09545e+07	0.148486	0.249333	mouse
762	1727	1.09545e+07	A	0.249333	Mcm3	MCM3	§163	DNA replication licensing factor MCM3	MCM3_MOUSE|P25206	http://www.phosphosite.org/proteinAction.do?id=3160&showAllSites=true	RYSDLT*TLVAFPSSSVYPTK	3	771.379	3	A	87.715	1.03981e+07	8.42206e+06	1.28858e+07	9.02317e+06	9.41007e+06	1.09545e+07	0.148486	0.249333	mouse
763	1730	2.48523e+08	A	0.234522	Mcm4	MCM4	§19	DNA replication licensing factor MCM4	MCM4_MOUSE|P49717	http://www.phosphosite.org/proteinAction.do?id=1869&showAllSites=true	VT*PTQSLR	2	491.242	7	A	28.05	2.0731e+08	2.89736e+08	2.03761e+08	2.12198e+08	2.48523e+08	2.07979e+08	0.234522	0.028683	mouse
764	1731	4.07522e+06	A	0.844768	Mcm4	MCM4	§87	DNA replication licensing factor MCM4	MCM4_MOUSE|P49717	http://www.phosphosite.org/proteinAction.do?id=1869&showAllSites=true	SLAIPLDFDVSS*PLTYGTPSSR	3	801.721	1	A	105.87	5.05232e+06	1.27359e+06	4.96454e+06	3.1859e+06	3.16295e+06	4.07522e+06	0.844768	0.308619	mouse
765	1734	4.07522e+06	A	0.844768	Mcm4	MCM4	86	DNA replication licensing factor MCM4	MCM4_MOUSE|P49717	http://www.phosphosite.org/proteinAction.do?id=1869&showAllSites=true	SLAIPLDFDVS*SPLTYGTPSSR	3	801.721	1	A	105.87	5.05232e+06	1.27359e+06	4.96454e+06	3.1859e+06	3.16295e+06	4.07522e+06	0.844768	0.308619	mouse
766	1735	4.07522e+06	A	0.844768	Mcm4	MCM4	90	DNA replication licensing factor MCM4	MCM4_MOUSE|P49717	http://www.phosphosite.org/proteinAction.do?id=1869&showAllSites=true	SLAIPLDFDVSSPLT*YGTPSSR	3	801.721	1	A	105.87	5.05232e+06	1.27359e+06	4.96454e+06	3.1859e+06	3.16295e+06	4.07522e+06	0.844768	0.308619	mouse
767	1736	1.29017e+07	A	0.237232	Terf2ip	TERF2IP	§43	Telomeric repeat-binding factor 2-interacting protein 1	TE2IP_MOUSE|Q91VL8	http://www.phosphosite.org/proteinAction.do?id=6572&showAllSites=true	RLS*TLILHGGGTVCR	3	573.962	1	A	54.22	1.41735e+07	1.16299e+07	1.38316e+07	9.85777e+06	1.29017e+07	1.18447e+07	0.13941	0.237232	mouse
768	1737	1.29017e+07	A	0.237232	Terf2ip	TERF2IP	§44	Telomeric repeat-binding factor 2-interacting protein 1	TE2IP_MOUSE|Q91VL8	http://www.phosphosite.org/proteinAction.do?id=6572&showAllSites=true	RLST*LILHGGGTVCR	3	573.962	2	A	54.22	1.41735e+07	1.16299e+07	1.38316e+07	9.85777e+06	1.29017e+07	1.18447e+07	0.13941	0.237232	mouse
769	Cytoskeletal protein
770	1738	2.94757e+07	A	0.148621	Ablim1;Ablim1;Ablim1;Ablim1	abLIM;abLIM iso2 iso 2;abLIM iso3 iso 3;abLIM iso3 iso 4	§475; 355; 159; 355	Actin-binding LIM protein 1	ABLM1_MOUSE|Q8K4G5;ABLM1_MOUSE|Q8K4G5-2;ABLM1_MOUSE|Q8K4G5-3;ABLM1_MOUSE|Q8K4G5-4	http://www.phosphosite.org/proteinAction.do?id=3230&showAllSites=true	TLS*PTPSAEGYQDVR	2	850.88	4	A	46.7525	2.10501e+07	2.18495e+07	3.25733e+07	2.6378e+07	2.14498e+07	2.94757e+07	0.0263525	0.148621	mouse
771	1739	2.09203e+07	A	0.170381	Ablim1;Ablim1;Ablim1;Ablim1	abLIM;abLIM iso2 iso 2;abLIM iso3 iso 3;abLIM iso3 iso 4	§496; 376; 180; 376	Actin-binding LIM protein 1	ABLM1_MOUSE|Q8K4G5;ABLM1_MOUSE|Q8K4G5-2;ABLM1_MOUSE|Q8K4G5-3;ABLM1_MOUSE|Q8K4G5-4	http://www.phosphosite.org/proteinAction.do?id=3230&showAllSites=true	STS*QGSINSPVYSR	2	781.846	4	A	38.475	1.03258e+07	1.21885e+07	2.34407e+07	1.83998e+07	1.12572e+07	2.09203e+07	0.117005	0.170381	mouse
772	1740	6.44434e+07	A	0.326805	Ablim1;Ablim1;Ablim1;Ablim1	abLIM;abLIM iso2 iso 2;abLIM iso3 iso 3;abLIM iso3 iso 4	§670, §671; 510, 511; 354, 355; 463, 464	Actin-binding LIM protein 1	ABLM1_MOUSE|Q8K4G5;ABLM1_MOUSE|Q8K4G5-2;ABLM1_MOUSE|Q8K4G5-3;ABLM1_MOUSE|Q8K4G5-4	http://www.phosphosite.org/proteinAction.do?id=3230&showAllSites=true	RRS*S*GREEDEEELLR	3	674.288	2	A	35.62	4.22776e+07	4.58185e+07	7.93354e+07	4.95515e+07	4.4048e+07	6.44434e+07	0.0568425	0.326805	mouse
773	1744	1.2603e+08	A	0.212401	Ablim1;Ablim1;Ablim1;Ablim1	abLIM;abLIM iso2 iso 2;abLIM iso3 iso 3;abLIM iso3 iso 4	§670; 510; 354; 463	Actin-binding LIM protein 1	ABLM1_MOUSE|Q8K4G5;ABLM1_MOUSE|Q8K4G5-2;ABLM1_MOUSE|Q8K4G5-3;ABLM1_MOUSE|Q8K4G5-4	http://www.phosphosite.org/proteinAction.do?id=3230&showAllSites=true	S*SGREEDEEELLR	3	543.565	10	A	38.83	5.77526e+07	6.21954e+07	1.44958e+08	1.07101e+08	5.9974e+07	1.2603e+08	0.0523815	0.212401	mouse
774	1746	4.28512e+08	A	0.396384	Ablim1;Ablim1;Ablim1;Ablim1	abLIM;abLIM iso2 iso 2;abLIM iso3 iso 3;abLIM iso3 iso 4	§671; 511; 355; 464	Actin-binding LIM protein 1	ABLM1_MOUSE|Q8K4G5;ABLM1_MOUSE|Q8K4G5-2;ABLM1_MOUSE|Q8K4G5-3;ABLM1_MOUSE|Q8K4G5-4	http://www.phosphosite.org/proteinAction.do?id=3230&showAllSites=true	RSS*GREEDEEELLR	3	595.598	8	A	33.9125	2.72607e+08	2.86228e+08	5.48618e+08	3.08406e+08	2.79417e+08	4.28512e+08	0.0344713	0.396384	mouse
775	1748	3.76232e+07	A	0.156799	Ablim1;Ablim1;Ablim1;Ablim1	abLIM;abLIM iso2 iso 2;abLIM iso3 iso 3;abLIM iso3 iso 4	§738; 578; 422; 531	Actin-binding LIM protein 1	ABLM1_MOUSE|Q8K4G5;ABLM1_MOUSE|Q8K4G5-2;ABLM1_MOUSE|Q8K4G5-3;ABLM1_MOUSE|Q8K4G5-4	http://www.phosphosite.org/proteinAction.do?id=3230&showAllSites=true	TSS*LPGYGK	2	495.221	4	A	32.9675	3.17419e+07	3.64311e+07	4.17946e+07	3.34518e+07	3.40865e+07	3.76232e+07	0.0972753	0.156799	mouse
776	1749	2.26087e+08	A	0.186687	Ablim1;Ablim1;Ablim1;Ablim1	abLIM;abLIM iso2 iso 2;abLIM iso3 iso 3;abLIM iso3 iso 4	§752; 592; 436; 545	Actin-binding LIM protein 1	ABLM1_MOUSE|Q8K4G5;ABLM1_MOUSE|Q8K4G5-2;ABLM1_MOUSE|Q8K4G5-3;ABLM1_MOUSE|Q8K4G5-4	http://www.phosphosite.org/proteinAction.do?id=3230&showAllSites=true	NGLHRPVS*TDFAQYNSYGDISGGVR	3	930.759	9	A	60.7725	1.75892e+08	1.37313e+08	2.55933e+08	1.96242e+08	1.56603e+08	2.26087e+08	0.174194	0.186687	mouse
777	1753	29177604	A	0.652628	Ablim1;Ablim1;Ablim1;Ablim1	abLIM;abLIM iso2 iso 2;abLIM iso3 iso 3;abLIM iso3 iso 4	§753, §760; 593, 600; 437, 444; 546, 553	Actin-binding LIM protein 1	ABLM1_MOUSE|Q8K4G5;ABLM1_MOUSE|Q8K4G5-2;ABLM1_MOUSE|Q8K4G5-3;ABLM1_MOUSE|Q8K4G5-4	http://www.phosphosite.org/proteinAction.do?id=3230&showAllSites=true	NGLHRPVST*DFAQYNS*YGDISGGVR	3	957.415	3	A	64.6733	6747904	10436555	42642416	15712792	8.59223e+06	29177604	0.303562	0.652628	mouse
778	1754	2.26087e+08	A	0.186687	Ablim1;Ablim1;Ablim1;Ablim1	abLIM;abLIM iso2 iso 2;abLIM iso3 iso 3;abLIM iso3 iso 4	§753; 593; 437; 546	Actin-binding LIM protein 1	ABLM1_MOUSE|Q8K4G5;ABLM1_MOUSE|Q8K4G5-2;ABLM1_MOUSE|Q8K4G5-3;ABLM1_MOUSE|Q8K4G5-4	http://www.phosphosite.org/proteinAction.do?id=3230&showAllSites=true	NGLHRPVST*DFAQYNSYGDISGGVR	3	930.759	3	A	60.7725	1.75892e+08	1.37313e+08	2.55933e+08	1.96242e+08	1.56603e+08	2.26087e+08	0.174194	0.186687	mouse
779	1757	10061713	A	0.392097	Ablim1;Ablim1;Ablim1;Ablim1	abLIM;abLIM iso2 iso 2;abLIM iso3 iso 3;abLIM iso3 iso 4	§758; 598; 442; 551	Actin-binding LIM protein 1	ABLM1_MOUSE|Q8K4G5;ABLM1_MOUSE|Q8K4G5-2;ABLM1_MOUSE|Q8K4G5-3;ABLM1_MOUSE|Q8K4G5-4	http://www.phosphosite.org/proteinAction.do?id=3230&showAllSites=true	PVSTDFAQY*NSYGDISGGVR	2	1106.98	1	A	69.18	11448548	6478262	12586722	7536704	8963405	10061713	0.392097	0.3549	mouse
780	1758	2.26087e+08	A	0.186687	Ablim1;Ablim1;Ablim1;Ablim1	abLIM;abLIM iso2 iso 2;abLIM iso3 iso 3;abLIM iso3 iso 4	§760; 600; 444; 553	Actin-binding LIM protein 1	ABLM1_MOUSE|Q8K4G5;ABLM1_MOUSE|Q8K4G5-2;ABLM1_MOUSE|Q8K4G5-3;ABLM1_MOUSE|Q8K4G5-4	http://www.phosphosite.org/proteinAction.do?id=3230&showAllSites=true	NGLHRPVSTDFAQYNS*YGDISGGVR	3	930.759	9	A	60.7725	1.75892e+08	1.37313e+08	2.55933e+08	1.96242e+08	1.56603e+08	2.26087e+08	0.174194	0.186687	mouse
781	1772	7.52105e+08	A	0.29751	Ablim1;Ablim1;Ablim1;Ablim1	abLIM;abLIM iso2 iso 2;abLIM iso3 iso 3;abLIM iso3 iso 4	§789; 629; 473; 582	Actin-binding LIM protein 1	ABLM1_MOUSE|Q8K4G5;ABLM1_MOUSE|Q8K4G5-2;ABLM1_MOUSE|Q8K4G5-3;ABLM1_MOUSE|Q8K4G5-4	http://www.phosphosite.org/proteinAction.do?id=3230&showAllSites=true	GVS*MPNMLEPK	2	641.782	37	A	56.42	4.53359e+08	6.94925e+08	8.06743e+08	6.97467e+08	5.74142e+08	7.52105e+08	0.29751	0.102739	mouse
782	1773	4.71026e+07	A	0.293954	Ablim1;Ablim1;Ablim1;Ablim1	abLIM;abLIM iso2 iso 2;abLIM iso3 iso 3;abLIM iso3 iso 4	773; 613; 457; 566	Actin-binding LIM protein 1	ABLM1_MOUSE|Q8K4G5;ABLM1_MOUSE|Q8K4G5-2;ABLM1_MOUSE|Q8K4G5-3;ABLM1_MOUSE|Q8K4G5-4	http://www.phosphosite.org/proteinAction.do?id=3230&showAllSites=true	DYQT*LPDGHMPAVR	3	560.58	4	A	53.1925	4.19175e+07	5.22877e+07	4.53108e+07	2.9716e+07	4.71026e+07	3.75134e+07	0.155679	0.293954	mouse
783	1774	1.59863e+08	A	0.142511	Actr8	ACTR8	§132	Actin-related protein 8	ARP8_MOUSE|Q8R2S9	http://www.phosphosite.org/proteinAction.do?id=10056&showAllSites=true	RIPVS*PEQTR	2	631.816	7	A	28.725	1.30111e+08	1.59273e+08	1.59821e+08	1.59904e+08	1.44692e+08	1.59863e+08	0.142511	0.00036866	mouse
784	1778	2.68918e+08	A	0.244373	Add2;Add2;Add1;Add3;Add3	ADD2;ADD2 iso2 iso 3;ADD1;ADD3;ADD3 iso2 iso 2	§712; 464; §724; §693; 661	Beta-adducin	ADDB_MOUSE|Q9QYB8;ADDB_MOUSE|Q9QYB8-3;ADDA_MOUSE|Q9QYC0;ADDG_MOUSE|Q9QYB5;ADDG_MOUSE|Q9QYB5-2	http://www.phosphosite.org/proteinAction.do?id=3215&showAllSites=true	TPS*FLKK	2	450.733	6	A	37.7525	2.01792e+08	2.29306e+08	3.15386e+08	2.22449e+08	2.15549e+08	2.68918e+08	0.0902572	0.244373	mouse
785	1779	1.36008e+07	A	0.12861	Arvcf;Arvcf;Arvcf;Arvcf;Arvcf	ARVCF;ARVCF iso 2;ARVCF iso 3;ARVCF iso 4;ARVCF iso 5	§643; 637; 637; 573; 579	Armadillo repeat protein deleted in velo-cardio-facial syndrome homolog	ARVC_MOUSE|P98203;ARVC_MOUSE|P98203-2;ARVC_MOUSE|P98203-3;ARVC_MOUSE|P98203-4;ARVC_MOUSE|P98203-5	http://www.phosphosite.org/proteinAction.do?id=6599&showAllSites=true	NFDT*LDLPK	2	571.76	4	A	70.33	1.05633e+07	1.13036e+07	1.48377e+07	1.23639e+07	1.09334e+07	1.36008e+07	0.0478746	0.12861	mouse
786	1780	1.32628e+08	A	0.0999715	Bsn;Mprip;Mprip;Mprip;Mprip;Sorbs3;Bsn	BSN;RIP3;RIP3 iso 2;RIP3 iso 4;RIP3 iso 5;vinexin;BSN iso 2	§2811; §364; §364; 326; §364; §402; §2811	Protein bassoon	BSN_MOUSE|O88737;MPRIP_MOUSE|P97434;MPRIP_MOUSE|P97434-2;MPRIP_MOUSE|P97434-4;MPRIP_MOUSE|P97434-5;VINEX_MOUSE|Q9R1Z8;BSN_MOUSE|O88737-2	http://www.phosphosite.org/proteinAction.do?id=8008&showAllSites=true	PLS*PHR	2	393.687	4	A	14.895	8.98759e+07	9.90082e+07	1.42004e+08	1.23253e+08	9.44421e+07	1.32628e+08	0.0683753	0.0999715	mouse
787	1782	4.2917e+07	A	0.133616	Cep170b;Cep170b;Cep170	CEP170B;Cep170b iso 2;CEP170	225; 225; §239	Centrosomal protein of 170 kDa protein B	C170B_MOUSE|Q80U49;C170B_MOUSE|Q80U49-2;CE170_MOUSE|Q6A065	http://www.phosphosite.org/proteinAction.do?id=23655&showAllSites=true	REPSY*FEIPTK	3	482.894	6	A	57.2825	2.55083e+07	2.5646e+07	4.69718e+07	3.88621e+07	2.55771e+07	4.2917e+07	0.00380711	0.133616	mouse
788	1783	1.86562e+07	A	0.211641	Clasp2	CLASP2	§376	CLIP-associating protein 2	CLAP2_MOUSE|Q8BRT1	http://www.phosphosite.org/proteinAction.do?id=6744&showAllSites=true	SRS*DIDVNAAAGAK	2	727.835	4	A	27.565	1.00905e+07	1.11597e+07	1.58643e+07	2.14482e+07	1.06251e+07	1.86562e+07	0.0711523	0.211641	mouse
789	1785	9.20714e+07	A	0.164626	Clasp2	CLASP2	§884	CLIP-associating protein 2	CLAP2_MOUSE|Q8BRT1	http://www.phosphosite.org/proteinAction.do?id=6744&showAllSites=true	NTGNGTQSSMGS*PLTRPTPR	3	713.66	4	A	33.9267	8.23063e+07	1.01836e+08	6.05658e+07	4.79354e+07	9.20714e+07	5.42506e+07	0.149992	0.164626	mouse
790	1787	8.69518e+06	A	0.189614	Clasp2	CLASP2	§944	CLIP-associating protein 2	CLAP2_MOUSE|Q8BRT1	http://www.phosphosite.org/proteinAction.do?id=6744&showAllSites=true	GVTEAIQNFS*FRSQEDMSEPVR	3	869.723	2	A	70.31	7.52935e+06	9.861e+06	2.95848e+06	2.90692e+06	8.69518e+06	2.9327e+06	0.189614	0.0124323	mouse
791	1789	4.3463e+07	A	0.252981	Clasp2	CLASP2	§947	CLIP-associating protein 2	CLAP2_MOUSE|Q8BRT1	http://www.phosphosite.org/proteinAction.do?id=6744&showAllSites=true	S*QEDMSEPVR	2	629.245	4	A	36.67	3.70582e+07	4.98678e+07	2.18528e+07	1.52209e+07	4.3463e+07	1.85369e+07	0.208401	0.252981	mouse
792	1790	1.19007e+07	A	0.279902	Clasp2	CLASP2	881	CLIP-associating protein 2	CLAP2_MOUSE|Q8BRT1	http://www.phosphosite.org/proteinAction.do?id=6744&showAllSites=true	NTGNGTQSS*M#GSPLTRPTPR	3	718.991	1	A	26.57	9.54534e+06	1.42562e+07	5.13598e+06	4.92721e+06	1.19007e+07	5.0316e+06	0.279902	0.0293398	mouse
793	1791	7.32514e+06	A	0.631608	Clasp2	CLASP2	952	CLIP-associating protein 2	CLAP2_MOUSE|Q8BRT1	http://www.phosphosite.org/proteinAction.do?id=6744&showAllSites=true	GVTEAIQNFSFRSQEDM#S*EPVR	3	875.055	1	A	68.23	1.00995e+07	4.55082e+06	2.68794e+06	1.02824e+06	7.32514e+06	1.85809e+06	0.535618	0.631608	mouse
794	1793	3.80221e+06	A	0.207539	Clip1;Clip2;Clip2;Clip1	Restin;CYLN2;CYLN2 iso 2;Restin iso 2	§349; §355; §355; §349	CAP-Gly domain-containing linker protein 1	CLIP1_MOUSE|Q922J3;CLIP2_MOUSE|Q9Z0H8;CLIP2_MOUSE|Q9Z0H8-2;CLIP1_MOUSE|Q922J3-2	http://www.phosphosite.org/proteinAction.do?id=6777&showAllSites=true	KISGT*TALQEALK	3	480.588	2	A	57.5	2.78699e+06	2.42189e+06	4.36019e+06	3.24423e+06	2.60444e+06	3.80221e+06	0.0991251	0.207539	mouse
795	1795	4.77147e+07	A	0.507138	Clip2;Clip2	CYLN2;CYLN2 iso 2	§151, §178; §151, §178	CAP-Gly domain-containing linker protein 2	CLIP2_MOUSE|Q9Z0H8;CLIP2_MOUSE|Q9Z0H8-2	http://www.phosphosite.org/proteinAction.do?id=16160&showAllSites=true	QPT*AEGSGSDTHSVESLTAQNLSLHSGTAT*PPLTGR	4	941.926	3	A	65.99	1.63116e+07	7.70075e+06	5.29602e+07	4.24692e+07	1.20062e+07	4.77147e+07	0.507138	0.155472	mouse
796	1796	4.77147e+07	A	0.507138	Clip2;Clip2	CYLN2;CYLN2 iso 2	§151, 176; §151, 176	CAP-Gly domain-containing linker protein 2	CLIP2_MOUSE|Q9Z0H8;CLIP2_MOUSE|Q9Z0H8-2	http://www.phosphosite.org/proteinAction.do?id=16160&showAllSites=true	QPT*AEGSGSDTHSVESLTAQNLSLHSGT*ATPPLTGR	4	941.926	1	A	65.99	1.63116e+07	7.70075e+06	5.29602e+07	4.24692e+07	1.20062e+07	4.77147e+07	0.507138	0.155472	mouse
797	1798	1.09801e+08	A	0.0944392	Clip2;Clip2	CYLN2;CYLN2 iso 2	§151; §151	CAP-Gly domain-containing linker protein 2	CLIP2_MOUSE|Q9Z0H8;CLIP2_MOUSE|Q9Z0H8-2	http://www.phosphosite.org/proteinAction.do?id=16160&showAllSites=true	QPT*AEGSGSDTHSVESLTAQNLSLHSGTATPPLTGR	4	921.934	5	A	63.62	4.41728e+07	3.86425e+07	1.15838e+08	1.03763e+08	4.14076e+07	1.09801e+08	0.0944392	0.0777612	mouse
798	1799	8.719e+06	A	0.227983	Clip2;Clip2	CYLN2;CYLN2 iso 2	§974; 939	CAP-Gly domain-containing linker protein 2	CLIP2_MOUSE|Q9Z0H8;CLIP2_MOUSE|Q9Z0H8-2	http://www.phosphosite.org/proteinAction.do?id=16160&showAllSites=true	RYS*LIDPASPPELLK	3	593.641	2	A	76.495	7.37181e+06	6.12133e+06	1.01246e+07	7.31342e+06	6.74657e+06	8.719e+06	0.131062	0.227983	mouse
799	1800	1.37569e+07	A	0.0529018	Dbn1;Dbn1	DBN1;DBN1 iso3 iso 2	338, 339, 340, 343; 338, 339, 340, 343	Drebrin	DREB_MOUSE|Q9QXS6;DREB_MOUSE|Q9QXS6-2	http://www.phosphosite.org/proteinAction.do?id=2750&showAllSites=true	PSSS*S*S*SSS*SPPR	3	523.815	1	A	33.83	1.29928e+07	1.33827e+07	1.32423e+07	1.42715e+07	1.31877e+07	1.37569e+07	0.0209055	0.0529018	mouse
800	1803	2.42113e+08	A	0.279394	Dmd;Hmha1;Hmha1;Rnf130;Stag3;Tmod3	dystrophin;HMHA1;HMHA1 iso 2;RNF130;STAG3;TMOD3	§1275; §300; 184; §167; §1043; §71	Dystrophin	DMD_MOUSE|P11531;HMHA1_MOUSE|Q3TBD2;HMHA1_MOUSE|Q3TBD2-2;GOLI_MOUSE|Q8VEM1;STAG3_MOUSE|O70576;TMOD3_MOUSE|Q9JHJ0	http://www.phosphosite.org/proteinAction.do?id=8496&showAllSites=true	LLS*YLEK	2	473.238	6	A	79.2875	2.39853e+08	2.44373e+08	1.29606e+08	8.68439e+07	2.42113e+08	1.08225e+08	0.0132009	0.279394	mouse
801	1804	8.34336e+06	A	0.220616	Dst	BPAG1 iso9	140	Dystonin	DYST_MOUSE|Q91ZU6-6	http://www.phosphosite.org/proteinAction.do?id=18407600&showAllSites=true	RPS*SGNASYR	2	587.754	1	A	14.26	7.88518e+06	7.97077e+06	9.64491e+06	7.0418e+06	7.92798e+06	8.34336e+06	0.00763461	0.220616	mouse
802	1806	1.74672e+08	A	0.218763	Dst;Dst;Dst;Dst	BPAG1;BPAG1 iso9 iso 2;BPAG1 iso9 iso 3;BPAG1 iso9 iso 4	7247; 5233; 7217; 7223	Dystonin	DYST_MOUSE|Q91ZU6;DYST_MOUSE|Q91ZU6-2;DYST_MOUSE|Q91ZU6-3;DYST_MOUSE|Q91ZU6-4	http://www.phosphosite.org/proteinAction.do?id=12240&showAllSites=true	STSASS*HACQAASPPVPAAASTPK	3	787.689	6	A	34.81	1.47421e+08	2.01375e+08	1.66545e+08	1.82798e+08	1.74398e+08	1.74672e+08	0.218763	0.0657956	mouse
803	1807	1.704e+07	A	0.254968	Eml1;Eml1;Eml1	EML1;EML1 iso4 iso 2;EML1 iso4 iso 3	§134, §139; 103, 108; 134, 139	Echinoderm microtubule-associated protein-like 1	EMAL1_MOUSE|Q05BC3;EMAL1_MOUSE|Q05BC3-2;EMAL1_MOUSE|Q05BC3-3	http://www.phosphosite.org/proteinAction.do?id=11694&showAllSites=true	TSS*SERVS*PGGR	3	460.517	1	A	16.25	9.03854e+06	1.23534e+07	2.01122e+07	1.39679e+07	1.0696e+07	1.704e+07	0.219143	0.254968	mouse
804	1808	5.10065e+07	A	0.235267	Eml1;Eml1;Eml1	EML1;EML1 iso4 iso 2;EML1 iso4 iso 3	§135, §139; 104, 108; 135, 139	Echinoderm microtubule-associated protein-like 1	EMAL1_MOUSE|Q05BC3;EMAL1_MOUSE|Q05BC3-2;EMAL1_MOUSE|Q05BC3-3	http://www.phosphosite.org/proteinAction.do?id=11694&showAllSites=true	TSSS*ERVS*PGGR	2	690.271	1	A	16.57	3.67833e+07	5.14641e+07	4.7366e+07	5.46471e+07	4.41237e+07	5.10065e+07	0.235267	0.100939	mouse
805	1809	4.70236e+06	A	0.137953	Epb41l2	EPB41L2	522	Band 4.1-like protein 2	E41L2_MOUSE|O70318	http://www.phosphosite.org/proteinAction.do?id=4361&showAllSites=true	EAS*TLIDRPAPQFER	3	603.956	1	A	55.91	3.13417e+06	3.04566e+06	5.16107e+06	4.24366e+06	3.08992e+06	4.70236e+06	0.0202544	0.137953	mouse
806	1811	3.30613e+07	A	0.244093	Epb41l4b	EHM2	§466	Band 4.1-like protein 4B	E41LB_MOUSE|Q9JMC8	http://www.phosphosite.org/proteinAction.do?id=9902&showAllSites=true	WRPHS*PNVSNHSICK	4	475.467	7	A	27.1375	1.08916e+07	1.4941e+07	3.87676e+07	2.73549e+07	1.29163e+07	3.30613e+07	0.221684	0.244093	mouse
807	1812	2.1145e+07	A	0.338325	Evl	EVL	§343, §347	Ena/VASP-like protein	EVL_MOUSE|P70429	http://www.phosphosite.org/proteinAction.do?id=10970&showAllSites=true	TPS*VAKS*PEAK	2	637.775	1	A	17.25	2.53872e+07	1.69028e+07	1.10004e+07	1.79187e+07	2.1145e+07	1.44595e+07	0.283723	0.338325	mouse
808	1813	4946242	A	0.72629	Evl;Evl	EVL;EVL iso 2	§300; §300	Ena/VASP-like protein	EVL_MOUSE|P70429;EVL_MOUSE|P70429-2	http://www.phosphosite.org/proteinAction.do?id=10970&showAllSites=true	KEDESQTEDPS*TSPSPGTR	3	709.962	1	A	19.24	2399308	7465550	3720578	6171906	4932429	4946242	0.72629	0.350438	mouse
809	1815	1.20784e+08	A	0.00728477	Evl;Evl	EVL;EVL iso 2	§329; §329	Ena/VASP-like protein	EVL_MOUSE|P70429;EVL_MOUSE|P70429-2	http://www.phosphosite.org/proteinAction.do?id=10970&showAllSites=true	SNS*VEKPVSSLLSR	3	528.266	8	A	55.9125	8.29065e+07	8.37651e+07	1.21334e+08	1.20235e+08	8.33358e+07	1.20784e+08	0.00728477	0.00643065	mouse
810	1816	2.78837e+07	A	0.239587	Evl;Ttpa	EVL;TTPA	§343; 174	Ena/VASP-like protein	EVL_MOUSE|P70429;TTPA_MOUSE|Q8BWP5	http://www.phosphosite.org/proteinAction.do?id=10970&showAllSites=true	TPS*VAK	2	341.662	1	A	15.68	2.31598e+07	3.26075e+07	2.64897e+07	2.22186e+07	2.78837e+07	2.43542e+07	0.239587	0.124008	mouse
811	1817	4.14243e+06	A	0.331992	Exoc7;Exoc7	EXOC7;EXOC7 iso 2	§241; §241	Exocyst complex component 7	EXOC7_MOUSE|O35250;EXOC7_MOUSE|O35250-2	http://www.phosphosite.org/proteinAction.do?id=9199&showAllSites=true	S*SSSSGVPYSPAIPNK	2	829.377	1	A	48.97	3.10505e+06	5.01012e+06	4.6567e+06	3.62817e+06	4.05759e+06	4.14243e+06	0.331992	0.175568	mouse
812	1818	4.14243e+06	A	0.331992	Exoc7;Exoc7	EXOC7;EXOC7 iso 2	§242; §242	Exocyst complex component 7	EXOC7_MOUSE|O35250;EXOC7_MOUSE|O35250-2	http://www.phosphosite.org/proteinAction.do?id=9199&showAllSites=true	SS*SSSGVPYSPAIPNK	2	829.377	1	A	48.97	3.10505e+06	5.01012e+06	4.6567e+06	3.62817e+06	4.05759e+06	4.14243e+06	0.331992	0.175568	mouse
813	1819	3.92506e+07	A	0.111225	Exoc7;Exoc7	EXOC7;EXOC7 iso 2	§243; §243	Exocyst complex component 7	EXOC7_MOUSE|O35250;EXOC7_MOUSE|O35250-2	http://www.phosphosite.org/proteinAction.do?id=9199&showAllSites=true	KSSS*SSGVPYSPAIPNK	2	893.425	1	A	42.425	3.61636e+07	4.23375e+07	3.45098e+07	3.72694e+07	3.92506e+07	3.58896e+07	0.111225	0.0543708	mouse
814	1821	9.96521e+07	A	0.168505	Exoc7;Exoc7	EXOC7;EXOC7 iso 2	§245; §245	Exocyst complex component 7	EXOC7_MOUSE|O35250;EXOC7_MOUSE|O35250-2	http://www.phosphosite.org/proteinAction.do?id=9199&showAllSites=true	KSSSSS*GVPYSPAIPNK	3	595.952	4	A	42.8775	7.71475e+07	9.63453e+07	1.11526e+08	8.77785e+07	8.67464e+07	9.96521e+07	0.15649	0.168505	mouse
815	1822	3.92506e+07	A	0.111225	Exoc7;Exoc7	EXOC7;EXOC7 iso 2	244; 244	Exocyst complex component 7	EXOC7_MOUSE|O35250;EXOC7_MOUSE|O35250-2	http://www.phosphosite.org/proteinAction.do?id=9199&showAllSites=true	KSSSS*SGVPYSPAIPNK	2	893.425	2	A	42.425	3.61636e+07	4.23375e+07	3.45098e+07	3.72694e+07	3.92506e+07	3.58896e+07	0.111225	0.0543708	mouse
816	1824	5.84156e+07	A	0.261647	Fam65b;Fam65b;Fam65b;Fam65b;Fam65b;Fam65b;Fam65b	FAM65B;FAM65B iso 2;FAM65B iso 3;FAM65B iso 4;FAM65B iso 5;FAM65B iso 6;FAM65B iso 7	§366; §366; §366; §366; §369; §369; 341	Protein FAM65B	FA65B_MOUSE|Q80U16;FA65B_MOUSE|Q80U16-2;FA65B_MOUSE|Q80U16-3;FA65B_MOUSE|Q80U16-4;FA65B_MOUSE|Q80U16-5;FA65B_MOUSE|Q80U16-6;FA65B_MOUSE|Q80U16-7	http://www.phosphosite.org/proteinAction.do?id=21482&showAllSites=true	RMS*MYSQGTPETPTFK	3	647.614	5	A	53.06	4.19434e+07	5.89858e+07	6.92232e+07	4.7608e+07	5.04646e+07	5.84156e+07	0.238797	0.261647	mouse
817	1825	2.65518e+07	A	0.250146	Fam65b;Fam65b;Fam65b;Fam65b;Fam65b;Fam65b;Fam65b	FAM65B;FAM65B iso 2;FAM65B iso 3;FAM65B iso 4;FAM65B iso 5;FAM65B iso 6;FAM65B iso 7	§369; §369; §369; §369; 372; 372; 344	Protein FAM65B	FA65B_MOUSE|Q80U16;FA65B_MOUSE|Q80U16-2;FA65B_MOUSE|Q80U16-3;FA65B_MOUSE|Q80U16-4;FA65B_MOUSE|Q80U16-5;FA65B_MOUSE|Q80U16-6;FA65B_MOUSE|Q80U16-7	http://www.phosphosite.org/proteinAction.do?id=21482&showAllSites=true	RMSMYS*QGTPETPTFK	2	970.918	1	A	49.9	2.18553e+07	3.12483e+07	2.7086e+07	2.29088e+07	2.65518e+07	2.49974e+07	0.250146	0.118161	mouse
818	1829	6.84291e+08	A	0.20255	Fam65b;Fam65b;Fam65b;Fam65b;Fam65b;Fam65b;Fam65b	FAM65B;FAM65B iso 2;FAM65B iso 3;FAM65B iso 4;FAM65B iso 5;FAM65B iso 6;FAM65B iso 7	§46; §46; §46; §46; 49; 49; 21	Protein FAM65B	FA65B_MOUSE|Q80U16;FA65B_MOUSE|Q80U16-2;FA65B_MOUSE|Q80U16-3;FA65B_MOUSE|Q80U16-4;FA65B_MOUSE|Q80U16-5;FA65B_MOUSE|Q80U16-6;FA65B_MOUSE|Q80U16-7	http://www.phosphosite.org/proteinAction.do?id=21482&showAllSites=true	SQS*FAGFSGLQER	2	747.325	15	A	67.7825	6.61052e+08	7.0753e+08	7.81205e+08	5.85465e+08	6.84291e+08	6.83335e+08	0.0480275	0.20255	mouse
819	1833	8.12665e+08	A	0.140636	Fam65b;Fam65b;Fam65b;Fam65b;Fam65b;Fam65b;Fam65b	FAM65B;FAM65B iso 2;FAM65B iso 3;FAM65B iso 4;FAM65B iso 5;FAM65B iso 6;FAM65B iso 7	§62; §62; §62; §62; 65; 65; 37	Protein FAM65B	FA65B_MOUSE|Q80U16;FA65B_MOUSE|Q80U16-2;FA65B_MOUSE|Q80U16-3;FA65B_MOUSE|Q80U16-4;FA65B_MOUSE|Q80U16-5;FA65B_MOUSE|Q80U16-6;FA65B_MOUSE|Q80U16-7	http://www.phosphosite.org/proteinAction.do?id=21482&showAllSites=true	CNS*FIENASALK	2	717.31	15	A	59.3975	7.42399e+08	8.27832e+08	8.9348e+08	7.31849e+08	7.85115e+08	8.12665e+08	0.0769446	0.140636	mouse
820	1836	1.61079e+06	A	0.223048	Fam65b;Fam65b;Fam65b;Fam65b;Fam65b;Fam65b;Fam65b	FAM65B;FAM65B iso 2;FAM65B iso 3;FAM65B iso 4;FAM65B iso 5;FAM65B iso 6;FAM65B iso 7	30; 30; 30; 30; 33; 33; 5	Protein FAM65B	FA65B_MOUSE|Q80U16;FA65B_MOUSE|Q80U16-2;FA65B_MOUSE|Q80U16-3;FA65B_MOUSE|Q80U16-4;FA65B_MOUSE|Q80U16-5;FA65B_MOUSE|Q80U16-6;FA65B_MOUSE|Q80U16-7	http://www.phosphosite.org/proteinAction.do?id=21482&showAllSites=true	MLVGS*QSFSPGGPNGIIR	3	632.973	2	A	93.115	851939	619816	1453622	1767959	735878	1.61079e+06	0.223048	0.137988	mouse
821	1837	3.23108e+07	A	0.172918	Fam65b;Fam65b;Fam65b;Fam65b;Fam65b;Fam65b;Fam65b	FAM65B;FAM65B iso 2;FAM65B iso 3;FAM65B iso 4;FAM65B iso 5;FAM65B iso 6;FAM65B iso 7	368; 368; 368; 368; 371; 371; 343	Protein FAM65B	FA65B_MOUSE|Q80U16;FA65B_MOUSE|Q80U16-2;FA65B_MOUSE|Q80U16-3;FA65B_MOUSE|Q80U16-4;FA65B_MOUSE|Q80U16-5;FA65B_MOUSE|Q80U16-6;FA65B_MOUSE|Q80U16-7	http://www.phosphosite.org/proteinAction.do?id=21482&showAllSites=true	RMSM#Y*SQGTPETPTFK	3	652.946	1	A	45.54	3.21735e+07	2.68979e+07	3.62615e+07	2.83601e+07	2.95357e+07	3.23108e+07	0.126302	0.172918	mouse
822	1839	2.65518e+07	A	0.250146	Fam65b;Fam65b;Fam65b;Fam65b;Fam65b;Fam65b;Fam65b	FAM65B;FAM65B iso 2;FAM65B iso 3;FAM65B iso 4;FAM65B iso 5;FAM65B iso 6;FAM65B iso 7	372; 372; 372; 372; 375; 375; 347	Protein FAM65B	FA65B_MOUSE|Q80U16;FA65B_MOUSE|Q80U16-2;FA65B_MOUSE|Q80U16-3;FA65B_MOUSE|Q80U16-4;FA65B_MOUSE|Q80U16-5;FA65B_MOUSE|Q80U16-6;FA65B_MOUSE|Q80U16-7	http://www.phosphosite.org/proteinAction.do?id=21482&showAllSites=true	RMSMYSQGT*PETPTFK	2	970.918	2	A	49.9	2.18553e+07	3.12483e+07	2.7086e+07	2.29088e+07	2.65518e+07	2.49974e+07	0.250146	0.118161	mouse
823	1851	4.70672e+09	A	0.173926	Flnc;Flnc	FLNC;FLNC iso 2	§2234; 2201	Filamin-C	FLNC_MOUSE|Q8VHX6;FLNC_MOUSE|Q8VHX6-2	http://www.phosphosite.org/proteinAction.do?id=12619&showAllSites=true	LGS*FGSITR	2	509.242	41	A	59.5875	3.83268e+09	3.94674e+09	5.28557e+09	4.12787e+09	3.88971e+09	4.70672e+09	0.0207362	0.173926	mouse
824	1852	1.74927e+06	A	0.300352	Gas2l1	GAS2L1	§352	GAS2-like protein 1	GA2L1_MOUSE|Q8JZP9	http://www.phosphosite.org/proteinAction.do?id=1973403&showAllSites=true	RYS*GDSDSSASSAQSGPMGAR	3	718.623	1	A	26.75		1.74927e+06	871983	1.34224e+06	1.74927e+06	1.10711e+06		0.300352	mouse
825	1855	5.14274e+07	A	0.2309	Gas2l1	GAS2L1	§654	GAS2-like protein 1	GA2L1_MOUSE|Q8JZP9	http://www.phosphosite.org/proteinAction.do?id=1973403&showAllSites=true	RPS*GPIELGAWHAQHSVTPR	4	569.783	5	A	49.8725	4.59361e+07	4.91288e+07	5.9824e+07	4.30308e+07	4.75325e+07	5.14274e+07	0.0474958	0.2309	mouse
826	1856	2.44973e+07	A	0.184768	Gas2l1;Gas2l1	GAS2L1;GAS2L1 iso 2	§306; §306	GAS2-like protein 1	GA2L1_MOUSE|Q8JZP9;GA2L1_MOUSE|Q8JZP9-2	http://www.phosphosite.org/proteinAction.do?id=1973403&showAllSites=true	PGS*PVPGSER	2	531.734	3	A	19.7167	1.28823e+07	1.67543e+07	2.46306e+07	2.4364e+07	1.48183e+07	2.44973e+07	0.184768	0.00769631	mouse
827	1857	3.37924e+08	A	0.0688066	Gas2l1;Gas2l1	GAS2L1;GAS2L1 iso 2	§316; §316	GAS2-like protein 1	GA2L1_MOUSE|Q8JZP9;GA2L1_MOUSE|Q8JZP9-2	http://www.phosphosite.org/proteinAction.do?id=1973403&showAllSites=true	RSS*RPEVTPISLR	3	526.61	6	A	42.7425	2.35819e+08	2.39452e+08	3.54365e+08	3.21483e+08	2.37636e+08	3.37924e+08	0.0108091	0.0688066	mouse
828	1859	3.8655e+07	A	0.253948	Golga2;Golga2	GM130;GM130 iso2 iso 2	§273; 241	Golgin subfamily A member 2	GOGA2_MOUSE|Q921M4;GOGA2_MOUSE|Q921M4-2	http://www.phosphosite.org/proteinAction.do?id=31018600&showAllSites=true	TLS*TVSTQQK	2	586.782	3	A	27.69	1.70331e+07	2.44892e+07	4.22673e+07	3.50426e+07	2.07612e+07	3.8655e+07	0.253948	0.132161	mouse
829	1861	1.21175e+07	A	0.275134	Lima1;Lima1	eplin;eplin iso 2	§225; 65	LIM domain and actin-binding protein 1	LIMA1_MOUSE|Q9ERG0;LIMA1_MOUSE|Q9ERG0-2	http://www.phosphosite.org/proteinAction.do?id=4429&showAllSites=true	RLS*ENNCSLDDWEIGAGHLSSSAFNSEK	4	801.599	2	A	75.97	1.18734e+07	9.10907e+06	1.4475e+07	9.76007e+06	1.04912e+07	1.21175e+07	0.186314	0.275134	mouse
830	1862	1.76287e+07	A	0.202318	Lima1;Lima1	eplin;eplin iso 2	§230; §70	LIM domain and actin-binding protein 1	LIMA1_MOUSE|Q9ERG0;LIMA1_MOUSE|Q9ERG0-2	http://www.phosphosite.org/proteinAction.do?id=4429&showAllSites=true	RLSENNCS*LDDWEIGAGHLSSSAFNSEK	3	1068.46	3	A	75.9567	2.01506e+07	1.51067e+07	1.83173e+07	1.4131e+07	1.76287e+07	1.62241e+07	0.202318	0.182453	mouse
831	1864	7.34686e+06	A	0.423599	Lmna	lamin A/C	§575	Prelamin-A/C	LMNA_MOUSE|P48678	http://www.phosphosite.org/proteinAction.do?id=6080&showAllSites=true	GSHCSGS*GDPAEYNLR	3	596.233	1	A	34.86	1.58993e+06	2.94968e+06	7.52891e+06	7.16482e+06	2.2698e+06	7.34686e+06	0.423599	0.0350421	mouse
832	1865	5.44116e+07	A	0.13444	Lmna;Lmna	lamin A/C;lamin A/C iso3 iso 2	§12, §22; 12, 22	Prelamin-A/C	LMNA_MOUSE|P48678;LMNA_MOUSE|P48678-2	http://www.phosphosite.org/proteinAction.do?id=6080&showAllSites=true	S*GAQASSTPLS*PTR	2	760.313	4	A	26.91	5.22162e+07	5.66069e+07	5.19427e+07	4.29244e+07	5.44116e+07	4.74335e+07	0.0570598	0.13444	mouse
833	1866	5.44116e+07	A	0.13444	Lmna;Lmna	lamin A/C;lamin A/C iso3 iso 2	§18, §22; 18, 22	Prelamin-A/C	LMNA_MOUSE|P48678;LMNA_MOUSE|P48678-2	http://www.phosphosite.org/proteinAction.do?id=6080&showAllSites=true	SGAQASS*TPLS*PTR	2	760.313	2	A	26.91	5.22162e+07	5.66069e+07	5.19427e+07	4.29244e+07	5.44116e+07	4.74335e+07	0.0570598	0.13444	mouse
834	1867	1.67022e+10	A	0.0298805	Lmna;Lmna	lamin A/C;lamin A/C iso3 iso 2	§18; 18	Prelamin-A/C	LMNA_MOUSE|P48678;LMNA_MOUSE|P48678-2	http://www.phosphosite.org/proteinAction.do?id=6080&showAllSites=true	SGAQASS*TPLSPTR	2	720.33	3	A	27.62	1.59689e+10	1.66582e+10	1.64572e+10	1.69473e+10	1.63135e+10	1.67022e+10	0.0298805	0.0207493	mouse
835	1868	5.44116e+07	A	0.13444	Lmna;Lmna	lamin A/C;lamin A/C iso3 iso 2	§19, §22; 19, 22	Prelamin-A/C	LMNA_MOUSE|P48678;LMNA_MOUSE|P48678-2	http://www.phosphosite.org/proteinAction.do?id=6080&showAllSites=true	SGAQASST*PLS*PTR	2	760.313	1	A	26.91	5.22162e+07	5.66069e+07	5.19427e+07	4.29244e+07	5.44116e+07	4.74335e+07	0.0570598	0.13444	mouse
836	1870	1.67022e+10	A	0.0298805	Lmna;Lmna	lamin A/C;lamin A/C iso3 iso 2	§19; 19	Prelamin-A/C	LMNA_MOUSE|P48678;LMNA_MOUSE|P48678-2	http://www.phosphosite.org/proteinAction.do?id=6080&showAllSites=true	SGAQASST*PLSPTR	2	720.33	6	A	27.62	1.59689e+10	1.66582e+10	1.64572e+10	1.69473e+10	1.63135e+10	1.67022e+10	0.0298805	0.0207493	mouse
837	1880	1.67022e+10	A	0.0298805	Lmna;Lmna	lamin A/C;lamin A/C iso3 iso 2	§22; 22	Prelamin-A/C	LMNA_MOUSE|P48678;LMNA_MOUSE|P48678-2	http://www.phosphosite.org/proteinAction.do?id=6080&showAllSites=true	SGAQASSTPLS*PTR	2	720.33	38	A	27.62	1.59689e+10	1.66582e+10	1.64572e+10	1.69473e+10	1.63135e+10	1.67022e+10	0.0298805	0.0207493	mouse
838	1883	5.21696e+07	A	0.0795646	Lmna;Lmna;Lmna	lamin A/C;lamin A/C iso3 iso 2;lamin A/C iso3 iso 3	§224; 224; 112	Prelamin-A/C	LMNA_MOUSE|P48678;LMNA_MOUSE|P48678-2;LMNA_MOUSE|P48678-3	http://www.phosphosite.org/proteinAction.do?id=6080&showAllSites=true	HET*RLVEIDNGK	3	497.572	2	A	28.13	5.0052e+07	5.42873e+07	4.45236e+07	3.97806e+07	5.21696e+07	4.21521e+07	0.0574051	0.0795646	mouse
839	1884	2.27837e+07	A	0.225283	Lmna;Lmna;Lmna	lamin A/C;lamin A/C iso3 iso 2;lamin A/C iso3 iso 3	§301; 301; §189	Prelamin-A/C	LMNA_MOUSE|P48678;LMNA_MOUSE|P48678-2;LMNA_MOUSE|P48678-3	http://www.phosphosite.org/proteinAction.do?id=6080&showAllSites=true	IRIDS*LSAQLSQLQK	2	890.472	1	A	80.22	2.32582e+07	2.23093e+07	2.62503e+07	1.90362e+07	2.27837e+07	2.26433e+07	0.0294485	0.225283	mouse
840	1886	5.35274e+07	A	0.216451	Lmna;Lmna;Lmna	lamin A/C;lamin A/C iso3 iso 2;lamin A/C iso3 iso 3	§303; 303; §191	Prelamin-A/C	LMNA_MOUSE|P48678;LMNA_MOUSE|P48678-2;LMNA_MOUSE|P48678-3	http://www.phosphosite.org/proteinAction.do?id=6080&showAllSites=true	IRIDSLS*AQLSQLQK	3	593.984	5	A	79.1575	5.38778e+07	4.20633e+07	6.172e+07	4.53348e+07	4.79705e+07	5.35274e+07	0.174152	0.216451	mouse
841	1891	1.56945e+08	A	0.322218	Lmna;Lmna;Lmna	lamin A/C;lamin A/C iso3 iso 2;lamin A/C iso3 iso 3	§390, §392; 390, 392; §278, §280	Prelamin-A/C	LMNA_MOUSE|P48678;LMNA_MOUSE|P48678-2;LMNA_MOUSE|P48678-3	http://www.phosphosite.org/proteinAction.do?id=6080&showAllSites=true	LRLS*PS*PTSQR	3	467.881	13	A	36.7725	8.08224e+07	1.04222e+08	1.92704e+08	1.21186e+08	9.25223e+07	1.56945e+08	0.178835	0.322218	mouse
842	1892	5.58841e+08	A	0.136896	Lmna;Lmna;Lmna	lamin A/C;lamin A/C iso3 iso 2;lamin A/C iso3 iso 3	§390, §394; 390, 394; §278, §282	Prelamin-A/C	LMNA_MOUSE|P48678;LMNA_MOUSE|P48678-2;LMNA_MOUSE|P48678-3	http://www.phosphosite.org/proteinAction.do?id=6080&showAllSites=true	LRLS*PSPT*SQR	2	701.318	2	A	37.155	4.33029e+08	5.25848e+08	5.57275e+08	5.60407e+08	4.79439e+08	5.58841e+08	0.136896	0.00396246	mouse
843	1899	5.1275e+09	A	0.139784	Lmna;Lmna;Lmna	lamin A/C;lamin A/C iso3 iso 2;lamin A/C iso3 iso 3	§390; 390; §278	Prelamin-A/C	LMNA_MOUSE|P48678;LMNA_MOUSE|P48678-2;LMNA_MOUSE|P48678-3	http://www.phosphosite.org/proteinAction.do?id=6080&showAllSites=true	LRLS*PSPTSQR	3	441.226	23	A	30.3933	3.33232e+09	3.79703e+09	5.63432e+09	4.62069e+09	3.56467e+09	5.1275e+09	0.0921829	0.139784	mouse
844	1903	5.1275e+09	A	0.139784	Lmna;Lmna;Lmna	lamin A/C;lamin A/C iso3 iso 2;lamin A/C iso3 iso 3	§392; 392; §280	Prelamin-A/C	LMNA_MOUSE|P48678;LMNA_MOUSE|P48678-2;LMNA_MOUSE|P48678-3	http://www.phosphosite.org/proteinAction.do?id=6080&showAllSites=true	LRLSPS*PTSQR	3	441.226	7	A	30.3933	3.33232e+09	3.79703e+09	5.63432e+09	4.62069e+09	3.56467e+09	5.1275e+09	0.0921829	0.139784	mouse
845	1905	6.0266e+06	A	0.11753	Lmna;Lmna;Lmna	lamin A/C;lamin A/C iso3 iso 2;lamin A/C iso3 iso 3	§403, §404, §406; 403, 404, 406; 291, 292, 294	Prelamin-A/C	LMNA_MOUSE|P48678;LMNA_MOUSE|P48678-2;LMNA_MOUSE|P48678-3	http://www.phosphosite.org/proteinAction.do?id=6080&showAllSites=true	GRAS*S*HS*SQSQGGGSVTK	3	653.245	1	A	13.46	4.82592e+06	5.70076e+06	6.1248e+06	5.9284e+06	5.26334e+06	6.0266e+06	0.11753	0.0230436	mouse
846	1907	1.4338e+08	A	0.182726	Lmna;Lmna;Lmna	lamin A/C;lamin A/C iso3 iso 2;lamin A/C iso3 iso 3	§403, §407; 403, 407; 291, 295	Prelamin-A/C	LMNA_MOUSE|P48678;LMNA_MOUSE|P48678-2;LMNA_MOUSE|P48678-3	http://www.phosphosite.org/proteinAction.do?id=6080&showAllSites=true	AS*SHSS*QSQGGGSVTK	2	832.819	5	A	12.9925	1.24855e+08	1.61906e+08	1.23199e+08	1.41513e+08	1.4338e+08	1.32356e+08	0.182726	0.0978416	mouse
847	1908	345955248	A	0.0301798	Lmna;Lmna;Lmna	lamin A/C;lamin A/C iso3 iso 2;lamin A/C iso3 iso 3	§403; 403; 291	Prelamin-A/C	LMNA_MOUSE|P48678;LMNA_MOUSE|P48678-2;LMNA_MOUSE|P48678-3	http://www.phosphosite.org/proteinAction.do?id=6080&showAllSites=true	AS*SHSSQSQGGGSVTK	2	792.836	3	A	11.8667	339726528		338572448	353338048	339726528	345955248		0.0301798	mouse
848	1910	6.0266e+06	A	0.11753	Lmna;Lmna;Lmna	lamin A/C;lamin A/C iso3 iso 2;lamin A/C iso3 iso 3	§404, §406, §407; 404, 406, 407; 292, 294, 295	Prelamin-A/C	LMNA_MOUSE|P48678;LMNA_MOUSE|P48678-2;LMNA_MOUSE|P48678-3	http://www.phosphosite.org/proteinAction.do?id=6080&showAllSites=true	GRASS*HS*S*QSQGGGSVTK	3	653.245	1	A	13.46	4.82592e+06	5.70076e+06	6.1248e+06	5.9284e+06	5.26334e+06	6.0266e+06	0.11753	0.0230436	mouse
849	1912	49030504	A	0.0420255	Lmna;Lmna;Lmna	lamin A/C;lamin A/C iso3 iso 2;lamin A/C iso3 iso 3	§404, §406; 404, 406; 292, 294	Prelamin-A/C	LMNA_MOUSE|P48678;LMNA_MOUSE|P48678-2;LMNA_MOUSE|P48678-3	http://www.phosphosite.org/proteinAction.do?id=6080&showAllSites=true	ASS*HS*SQSQGGGSVTKK	3	598.247	3	A	12.19		47165468	50487520	47573488	47165468	49030504		0.0420255	mouse
850	1914	49030504	A	0.0420255	Lmna;Lmna;Lmna	lamin A/C;lamin A/C iso3 iso 2;lamin A/C iso3 iso 3	§404, §407; 404, 407; 292, 295	Prelamin-A/C	LMNA_MOUSE|P48678;LMNA_MOUSE|P48678-2;LMNA_MOUSE|P48678-3	http://www.phosphosite.org/proteinAction.do?id=6080&showAllSites=true	ASS*HSS*QSQGGGSVTKK	3	598.247	4	A	12.19		47165468	50487520	47573488	47165468	49030504		0.0420255	mouse
851	1917	55194982	A	0.1918	Lmna;Lmna;Lmna	lamin A/C;lamin A/C iso3 iso 2;lamin A/C iso3 iso 3	§404; 404; 292	Prelamin-A/C	LMNA_MOUSE|P48678;LMNA_MOUSE|P48678-2;LMNA_MOUSE|P48678-3	http://www.phosphosite.org/proteinAction.do?id=6080&showAllSites=true	ASS*HSSQSQGGGSVTKK	3	571.591	5	A	11.4367	39095636	51364044	58493408	51896556	45229840	55194982	0.1918	0.0845127	mouse
852	1919	1.13447e+08	A	0.128156	Lmna;Lmna;Lmna	lamin A/C;lamin A/C iso3 iso 2;lamin A/C iso3 iso 3	§406, §407; 406, 407; 294, 295	Prelamin-A/C	LMNA_MOUSE|P48678;LMNA_MOUSE|P48678-2;LMNA_MOUSE|P48678-3	http://www.phosphosite.org/proteinAction.do?id=6080&showAllSites=true	ASSHS*S*QSQGGGSVTK	3	555.549	2	A	12.32	9.35954e+07	1.12249e+08	1.15995e+08	1.10899e+08	1.02922e+08	1.13447e+08	0.128156	0.0317635	mouse
853	1920	583280576	A	0.112715	Lmna;Lmna;Lmna	lamin A/C;lamin A/C iso3 iso 2;lamin A/C iso3 iso 3	§406; 406; 294	Prelamin-A/C	LMNA_MOUSE|P48678;LMNA_MOUSE|P48678-2;LMNA_MOUSE|P48678-3	http://www.phosphosite.org/proteinAction.do?id=6080&showAllSites=true	ASSHS*SQSQGGGSVTK	3	528.893	1	A	11.82	438524992	427517952	629768896	536792256	433021472	583280576	0.0179741	0.112715	mouse
854	1921	1.13447e+08	A	0.128156	Lmna;Lmna;Lmna	lamin A/C;lamin A/C iso3 iso 2;lamin A/C iso3 iso 3	§407, §409; 407, 409; 295, 297	Prelamin-A/C	LMNA_MOUSE|P48678;LMNA_MOUSE|P48678-2;LMNA_MOUSE|P48678-3	http://www.phosphosite.org/proteinAction.do?id=6080&showAllSites=true	ASSHSS*QS*QGGGSVTK	3	555.549	1	A	12.32	9.35954e+07	1.12249e+08	1.15995e+08	1.10899e+08	1.02922e+08	1.13447e+08	0.128156	0.0317635	mouse
855	1931	1.41245e+09	A	0.304174	Lmna;Lmna;Lmna	lamin A/C;lamin A/C iso3 iso 2;lamin A/C iso3 iso 3	§548; 548; §436	Prelamin-A/C	LMNA_MOUSE|P48678;LMNA_MOUSE|P48678-2;LMNA_MOUSE|P48678-3	http://www.phosphosite.org/proteinAction.do?id=6080&showAllSites=true	SLT*MVEDNEDDDEDGEELLHHHR	4	704.534	21	A	54.1975	4.34718e+08	6.72962e+08	1.60168e+09	1.22322e+09	5.5384e+08	1.41245e+09	0.304174	0.189463	mouse
856	1934	1.9564e+09	A	0.220677	Lmnb1	Lamin B1	§24	Lamin-B1	LMNB1_MOUSE|P14733	http://www.phosphosite.org/proteinAction.do?id=2157&showAllSites=true	ASAPATPLS*PTR	2	624.803	9	A	35.4	1.87812e+09	2.03469e+09	1.27482e+09	1.74623e+09	1.9564e+09	1.51052e+09	0.0565893	0.220677	mouse
857	1935	1.01119e+07	A	0.116845	Lmnb2;Lmnb2	Lamin B2;Lamin B2 iso 2	§421, §424; 299, 302	Lamin-B2	LMNB2_MOUSE|P21619;LMNB2_MOUSE|P21619-2	http://www.phosphosite.org/proteinAction.do?id=7445&showAllSites=true	RLET*EDT*SGSPSR	2	797.811	1	A	18.37	9.27646e+06	1.09474e+07	1.02769e+07	9.9136e+06	1.01119e+07	1.00952e+07	0.116845	0.0254453	mouse
858	1937	3.6159e+07	A	0.373305	Lmnb2;Lmnb2	Lamin B2;Lamin B2 iso 2	§421; 299	Lamin-B2	LMNB2_MOUSE|P21619;LMNB2_MOUSE|P21619-2	http://www.phosphosite.org/proteinAction.do?id=7445&showAllSites=true	RLET*EDTSGSPSR	3	505.554	8	A	18.825	2.31834e+07	2.57428e+07	4.57038e+07	2.66143e+07	2.44631e+07	3.6159e+07	0.0739796	0.373305	mouse
859	1941	1.37159e+07	A	0.508732	Macf1;Macf1;Macf1;Macf1	ACF7 iso4 iso 4;ACF7;ACF7 iso4 iso 2;ACF7 iso4 iso 3	1527; §1376; 1376; 1319	Microtubule-actin cross-linking factor 1	MACF1_MOUSE|Q9QXZ0-4;MACF1_MOUSE|Q9QXZ0;MACF1_MOUSE|Q9QXZ0-2;MACF1_MOUSE|Q9QXZ0-3	http://www.phosphosite.org/proteinAction.do?id=7664801&showAllSites=true	MIS*SSDAITQEFMDLR	2	962.415	6	A	93.7167	4.52191e+06	9.60305e+06	1.52432e+07	1.21885e+07	7.06248e+06	1.37159e+07	0.508732	0.157479	mouse
860	1942	4.83138e+06	A	0.811728	Macf1;Macf1;Macf1;Macf1	ACF7 iso4 iso 4;ACF7;ACF7 iso4 iso 2;ACF7 iso4 iso 3	1533; 1382; 1382; 1325	Microtubule-actin cross-linking factor 1	MACF1_MOUSE|Q9QXZ0-4;MACF1_MOUSE|Q9QXZ0;MACF1_MOUSE|Q9QXZ0-2;MACF1_MOUSE|Q9QXZ0-3	http://www.phosphosite.org/proteinAction.do?id=7664801&showAllSites=true	M#ISSSDAIT*QEFM#DLR	3	652.609	1	A	86.08	7.60449e+06	2.05827e+06	3.36364e+06	4.34332e+06	4.83138e+06	3.85348e+06	0.811728	0.17977	mouse
861	1943	1.39545e+07	A	0.298803	Macf1;Macf1;Macf1;Macf1	ACF7 iso4 iso 4;ACF7;ACF7 iso4 iso 2;ACF7 iso4 iso 3	3518; §5394; 3367; 3310	Microtubule-actin cross-linking factor 1	MACF1_MOUSE|Q9QXZ0-4;MACF1_MOUSE|Q9QXZ0;MACF1_MOUSE|Q9QXZ0-2;MACF1_MOUSE|Q9QXZ0-3	http://www.phosphosite.org/proteinAction.do?id=7664801&showAllSites=true	RWT*DLLSK	2	549.771	2	A	61.695	7.99014e+06	1.03003e+07	1.69029e+07	1.10061e+07	9.14523e+06	1.39545e+07	0.178623	0.298803	mouse
862	1944	1.30745e+08	A	0.145827	Map1a;Map1a	MAP1A;MAP1A iso 2	§1720; 1944	Microtubule-associated protein 1A	MAP1A_MOUSE|Q9QYR6;MAP1A_MOUSE|Q9QYR6-2	http://www.phosphosite.org/proteinAction.do?id=2767&showAllSites=true	S*PWASDFK	2	509.207	4	A	56.6225	1.29846e+08	1.31644e+08	9.32104e+07	7.57844e+07	1.30745e+08	8.44974e+07	0.00972354	0.145827	mouse
863	1945	6.48656e+06	A	0.261188	Map1a;Map1a	MAP1A;MAP1A iso 2	§2182; 2406	Microtubule-associated protein 1A	MAP1A_MOUSE|Q9QYR6;MAP1A_MOUSE|Q9QYR6-2	http://www.phosphosite.org/proteinAction.do?id=2767&showAllSites=true	ALALVPGT*PTR	2	588.313	1	A	56.63	5.28857e+06	7.68455e+06	3.42984e+06	3.19456e+06	6.48656e+06	3.3122e+06	0.261188	0.0502273	mouse
864	1947	8.88717e+07	A	0.149805	Map1a;Map1a	MAP1A;MAP1A iso 2	§2209; 2433	Microtubule-associated protein 1A	MAP1A_MOUSE|Q9QYR6;MAP1A_MOUSE|Q9QYR6-2	http://www.phosphosite.org/proteinAction.do?id=2767&showAllSites=true	APSLDSSLPQLPS*PSSPGAPLLSNLPR	3	926.807	6	A	101.325	9.33233e+07	8.44201e+07	6.23415e+07	5.03991e+07	8.88717e+07	5.63703e+07	0.0708376	0.149805	mouse
865	1948	8.88717e+07	A	0.149805	Map1a;Map1a	MAP1A;MAP1A iso 2	§2212; 2436	Microtubule-associated protein 1A	MAP1A_MOUSE|Q9QYR6;MAP1A_MOUSE|Q9QYR6-2	http://www.phosphosite.org/proteinAction.do?id=2767&showAllSites=true	APSLDSSLPQLPSPSS*PGAPLLSNLPR	3	926.807	2	A	101.325	9.33233e+07	8.44201e+07	6.23415e+07	5.03991e+07	8.88717e+07	5.63703e+07	0.0708376	0.149805	mouse
866	1950	3.34353e+07	A	0.0141457	Map1a;Map1a	MAP1A;MAP1A iso 2	§2226; 2450	Microtubule-associated protein 1A	MAP1A_MOUSE|Q9QYR6;MAP1A_MOUSE|Q9QYR6-2	http://www.phosphosite.org/proteinAction.do?id=2767&showAllSites=true	PAS*PALSEGSSSEATTPVISSVAER	3	837.393	5	A	61.6225	3.32157e+07	3.26122e+07	3.31009e+07	3.37698e+07	3.29139e+07	3.34353e+07	0.0129655	0.0141457	mouse
867	1953	4.93537e+07	A	0.199232	Map1a;Map1a	MAP1A;MAP1A iso 2	§2603, §2605; 2827, 2829	Microtubule-associated protein 1A	MAP1A_MOUSE|Q9QYR6;MAP1A_MOUSE|Q9QYR6-2	http://www.phosphosite.org/proteinAction.do?id=2767&showAllSites=true	GKRS*PT*PGKGPVDR	4	403.691	14	A	15.3475	2.08751e+07	2.74443e+07	5.63066e+07	4.24009e+07	2.41597e+07	4.93537e+07	0.192268	0.199232	mouse
868	1957	3.35894e+08	A	0.366742	Map1a;Map1a	MAP1A;MAP1A iso 2	§384; 608	Microtubule-associated protein 1A	MAP1A_MOUSE|Q9QYR6;MAP1A_MOUSE|Q9QYR6-2	http://www.phosphosite.org/proteinAction.do?id=2767&showAllSites=true	VRTES*SEALK	3	400.527	10	A	18.0925	1.02815e+08	1.74811e+08	4.05144e+08	2.66643e+08	1.38813e+08	3.35894e+08	0.366742	0.291565	mouse
869	1960	3.35894e+08	A	0.366742	Map1a;Map1a	MAP1A;MAP1A iso 2	§385; 609	Microtubule-associated protein 1A	MAP1A_MOUSE|Q9QYR6;MAP1A_MOUSE|Q9QYR6-2	http://www.phosphosite.org/proteinAction.do?id=2767&showAllSites=true	VRTESS*EALK	3	400.527	2	A	18.0925	1.02815e+08	1.74811e+08	4.05144e+08	2.66643e+08	1.38813e+08	3.35894e+08	0.366742	0.291565	mouse
870	1961	7.35832e+07	A	0.192148	Map1a;Map1a	MAP1A;MAP1A iso 2	2281; 2505	Microtubule-associated protein 1A	MAP1A_MOUSE|Q9QYR6;MAP1A_MOUSE|Q9QYR6-2	http://www.phosphosite.org/proteinAction.do?id=2767&showAllSites=true	SLWDLTPLS*PAPLASR	2	902.456	5	A	106.185	6.35855e+07	8.35809e+07	2.91837e+07	2.53611e+07	7.35832e+07	2.72724e+07	0.192148	0.0991098	mouse
871	1963	2.0493e+08	A	0.166837	Map1a;Map1a	MAP1A;MAP1A iso 2	2623; 2847	Microtubule-associated protein 1A	MAP1A_MOUSE|Q9QYR6;MAP1A_MOUSE|Q9QYR6-2	http://www.phosphosite.org/proteinAction.do?id=2767&showAllSites=true	S*TPSQVTSEEK	2	636.771	1	A	20.6533	1.0903e+08	1.38195e+08	2.06177e+08	2.03682e+08	1.23612e+08	2.0493e+08	0.166837	0.00860686	mouse
872	1964	2.0493e+08	A	0.166837	Map1a;Map1a	MAP1A;MAP1A iso 2	2624; 2848	Microtubule-associated protein 1A	MAP1A_MOUSE|Q9QYR6;MAP1A_MOUSE|Q9QYR6-2	http://www.phosphosite.org/proteinAction.do?id=2767&showAllSites=true	ST*PSQVTSEEK	2	636.771	3	A	20.6533	1.0903e+08	1.38195e+08	2.06177e+08	2.03682e+08	1.23612e+08	2.0493e+08	0.166837	0.00860686	mouse
873	1966	8.5111e+06	A	0.148752	Map4;Map4;Map4;Map4	MAP4;MAP4 iso6 iso 2;MAP4 iso3 iso 3;MAP4 iso4 iso 4	§898; 898; 898; 745	Microtubule-associated protein 4	MAP4_MOUSE|P27546;MAP4_MOUSE|P27546-2;MAP4_MOUSE|P27546-3;MAP4_MOUSE|P27546-4	http://www.phosphosite.org/proteinAction.do?id=1731&showAllSites=true	LAT*TVSAPDLK	2	598.302	1	A	49.66	5.37052e+06	6.63311e+06	8.0739e+06	8.9483e+06	6.00181e+06	8.5111e+06	0.148752	0.0726452	mouse
874	1967	1.23956e+08	A	0.120972	Map6;Map6;Map6	MAP6;MAP6 iso3 iso 2;MAP6 iso3 iso 3	§491; 491; §288	Microtubule-associated protein 6	MAP6_MOUSE|Q7TSJ2;MAP6_MOUSE|Q7TSJ2-2;MAP6_MOUSE|Q7TSJ2-3	http://www.phosphosite.org/proteinAction.do?id=8692&showAllSites=true	IRS*LYSEPFK	2	660.323	6	A	54.7925	1.26266e+08	1.21645e+08	1.14101e+08	9.61192e+07	1.23956e+08	1.0511e+08	0.0263611	0.120972	mouse
875	1969	3.51465e+07	A	0.256468	Map6;Map6;Map6	MAP6;MAP6 iso3 iso 2;MAP6 iso3 iso 3	§493; 493; 290	Microtubule-associated protein 6	MAP6_MOUSE|Q7TSJ2;MAP6_MOUSE|Q7TSJ2-2;MAP6_MOUSE|Q7TSJ2-3	http://www.phosphosite.org/proteinAction.do?id=8692&showAllSites=true	IRSLY*SEPFK	3	440.551	2	A	55.215	2.97101e+07	2.4719e+07	4.15204e+07	2.87727e+07	2.72146e+07	3.51465e+07	0.129683	0.256468	mouse
876	1971	2.99426e+06	A	0.00864676	Map7d1;Map7d1	RPRC1;RPRC1 iso 2	§115, §118; §115, §118	MAP7 domain-containing protein 1	MA7D1_MOUSE|A2AJI0;MA7D1_MOUSE|A2AJI0-2	http://www.phosphosite.org/proteinAction.do?id=23650&showAllSites=true	RSS*QPS*PTTVPASDSPPAK	3	690.636	7	A	29.3075	1.7842e+06	1.80616e+06	2.98414e+06	3.00437e+06	1.79518e+06	2.99426e+06	0.00864676	0.00477758	mouse
877	1974	5.6147e+08	A	0.126026	Map7d1;Map7d1	RPRC1;RPRC1 iso 2	§115; §115	MAP7 domain-containing protein 1	MA7D1_MOUSE|A2AJI0;MA7D1_MOUSE|A2AJI0-2	http://www.phosphosite.org/proteinAction.do?id=23650&showAllSites=true	RSS*QPSPTTVPASDSPPAK	3	663.981	13	A	28.31	4.36703e+08	4.64182e+08	5.11435e+08	6.11505e+08	4.50443e+08	5.6147e+08	0.0431357	0.126026	mouse
878	1976	2.99426e+06	A	0.00864676	Map7d1;Map7d1	RPRC1;RPRC1 iso 2	§118, 125; §118, 125	MAP7 domain-containing protein 1	MA7D1_MOUSE|A2AJI0;MA7D1_MOUSE|A2AJI0-2	http://www.phosphosite.org/proteinAction.do?id=23650&showAllSites=true	RSSQPS*PTTVPAS*DSPPAK	3	690.636	2	A	29.3075	1.7842e+06	1.80616e+06	2.98414e+06	3.00437e+06	1.79518e+06	2.99426e+06	0.00864676	0.00477758	mouse
879	1978	5.6147e+08	A	0.126026	Map7d1;Map7d1	RPRC1;RPRC1 iso 2	§118; §118	MAP7 domain-containing protein 1	MA7D1_MOUSE|A2AJI0;MA7D1_MOUSE|A2AJI0-2	http://www.phosphosite.org/proteinAction.do?id=23650&showAllSites=true	RSSQPS*PTTVPASDSPPAK	3	663.981	2	A	28.31	4.36703e+08	4.64182e+08	5.11435e+08	6.11505e+08	4.50443e+08	5.6147e+08	0.0431357	0.126026	mouse
880	1979	2.99426e+06	A	0.00864676	Map7d1;Map7d1	RPRC1;RPRC1 iso 2	§120, §121; §120, §121	MAP7 domain-containing protein 1	MA7D1_MOUSE|A2AJI0;MA7D1_MOUSE|A2AJI0-2	http://www.phosphosite.org/proteinAction.do?id=23650&showAllSites=true	RSSQPSPT*T*VPASDSPPAK	3	690.636	1	A	29.3075	1.7842e+06	1.80616e+06	2.98414e+06	3.00437e+06	1.79518e+06	2.99426e+06	0.00864676	0.00477758	mouse
881	1980	5.75967e+07	A	0.106934	Map7d1;Map7d1	RPRC1;RPRC1 iso 2	§121; §121	MAP7 domain-containing protein 1	MA7D1_MOUSE|A2AJI0;MA7D1_MOUSE|A2AJI0-2	http://www.phosphosite.org/proteinAction.do?id=23650&showAllSites=true	RSSQPSPTT*VPASDSPPAK	2	995.467	1	A	28.83	4.33523e+07	5.04447e+07	5.60148e+07	5.91786e+07	4.68985e+07	5.75967e+07	0.106934	0.0388407	mouse
882	1982	4.05231e+08	A	0.130139	Map7d1;Map7d1	RPRC1;RPRC1 iso 2	§455; 418	MAP7 domain-containing protein 1	MA7D1_MOUSE|A2AJI0;MA7D1_MOUSE|A2AJI0-2	http://www.phosphosite.org/proteinAction.do?id=23650&showAllSites=true	LST*GSELSPK	2	549.758	7	A	30.45	2.13637e+08	2.56941e+08	3.88802e+08	4.21661e+08	2.35289e+08	4.05231e+08	0.130139	0.0573369	mouse
883	1983	1.34426e+08	A	0.354156	Map7d1;Map7d1	RPRC1;RPRC1 iso 2	§468, §469, §483, §496; 431, 432, 446, 459	MAP7 domain-containing protein 1	MA7D1_MOUSE|A2AJI0;MA7D1_MOUSE|A2AJI0-2	http://www.phosphosite.org/proteinAction.do?id=23650&showAllSites=true	ARPS*S*PSTTWHRPASPCPS*PGPGHALPPKPPS*PR	5	777.74	1	A	44.7633	1.0992e+08	7.55274e+07	1.68089e+08	1.00762e+08	9.27237e+07	1.34426e+08	0.262277	0.354156	mouse
884	1984	309931648	A	0.641984	Map7d1;Map7d1	RPRC1;RPRC1 iso 2	§468, §469, §496; 431, 432, 459	MAP7 domain-containing protein 1	MA7D1_MOUSE|A2AJI0;MA7D1_MOUSE|A2AJI0-2	http://www.phosphosite.org/proteinAction.do?id=23650&showAllSites=true	ARPS*S*PSTTWHRPASPCPSPGPGHALPPKPPS*PR	6	634.956	1	A	39.915	279826752	105092224	330297280	289566016	192459488	309931648	0.641984	0.0929281	mouse
885	1985	1.43368e+10	A	0.184751	Map7d1;Map7d1	RPRC1;RPRC1 iso 2	§468, §469; 431, 432	MAP7 domain-containing protein 1	MA7D1_MOUSE|A2AJI0;MA7D1_MOUSE|A2AJI0-2	http://www.phosphosite.org/proteinAction.do?id=23650&showAllSites=true	ARPS*S*PSTTWHRPASPCPSPGPGHALPPKPPSPR	5	745.753	3	A	35.69	9.25882e+09	9.47381e+09	1.62097e+10	1.24639e+10	9.36631e+09	1.43368e+10	0.0162305	0.184751	mouse
886	1988	10791898	A	0.672515	Map7d1;Map7d1	RPRC1;RPRC1 iso 2	§468, §471; 431, 434	MAP7 domain-containing protein 1	MA7D1_MOUSE|A2AJI0;MA7D1_MOUSE|A2AJI0-2	http://www.phosphosite.org/proteinAction.do?id=23650&showAllSites=true	PS*SPS*TTWHRPASPCPSPGPGHALPPKPPSPR	4	875.155	2	A	40.81	8013511		15923880	5659916	8013511	10791898		0.672515	mouse
887	1989	8.03519e+08	A	0.408907	Map7d1;Map7d1	RPRC1;RPRC1 iso 2	§468, §473, §479, §496; 431, 436, 442, 459	MAP7 domain-containing protein 1	MA7D1_MOUSE|A2AJI0;MA7D1_MOUSE|A2AJI0-2	http://www.phosphosite.org/proteinAction.do?id=23650&showAllSites=true	ARPS*SPSTT*WHRPAS*PCPSPGPGHALPPKPPS*PR	4	971.923	1	A	45.2675	4.82963e+08	8.75852e+08	8.51169e+08	7.55869e+08	6.79408e+08	8.03519e+08	0.408907	0.0838649	mouse
888	1990	9.624e+09	A	0.191558	Map7d1;Map7d1	RPRC1;RPRC1 iso 2	§468, §473, §483; 431, 436, 446	MAP7 domain-containing protein 1	MA7D1_MOUSE|A2AJI0;MA7D1_MOUSE|A2AJI0-2	http://www.phosphosite.org/proteinAction.do?id=23650&showAllSites=true	ARPS*SPSTT*WHRPASPCPS*PGPGHALPPKPPSPR	5	761.746	1	A	38.93	7.44556e+09	7.2317e+09	1.09276e+10	8.32041e+09	7.33863e+09	9.624e+09	0.0206059	0.191558	mouse
889	1995	9.624e+09	A	0.191558	Map7d1;Map7d1	RPRC1;RPRC1 iso 2	§468, §479, §496; 431, 442, 459	MAP7 domain-containing protein 1	MA7D1_MOUSE|A2AJI0;MA7D1_MOUSE|A2AJI0-2	http://www.phosphosite.org/proteinAction.do?id=23650&showAllSites=true	ARPS*SPSTTWHRPAS*PCPSPGPGHALPPKPPS*PR	5	761.746	13	A	38.93	7.44556e+09	7.2317e+09	1.09276e+10	8.32041e+09	7.33863e+09	9.624e+09	0.0206059	0.191558	mouse
890	2000	1.70745e+09	A	0.0800609	Map7d1;Map7d1	RPRC1;RPRC1 iso 2	§468, §479; 431, 442	MAP7 domain-containing protein 1	MA7D1_MOUSE|A2AJI0;MA7D1_MOUSE|A2AJI0-2	http://www.phosphosite.org/proteinAction.do?id=23650&showAllSites=true	ARPS*SPSTTWHRPAS*PCPSPGPGHALPPKPPSPR	4	931.939	8	A	37.165	1.37075e+09	1.23227e+09	1.80411e+09	1.61079e+09	1.30151e+09	1.70745e+09	0.0752405	0.0800609	mouse
891	2005	9.624e+09	A	0.191558	Map7d1;Map7d1	RPRC1;RPRC1 iso 2	§468, §483, §496; 431, 446, 459	MAP7 domain-containing protein 1	MA7D1_MOUSE|A2AJI0;MA7D1_MOUSE|A2AJI0-2	http://www.phosphosite.org/proteinAction.do?id=23650&showAllSites=true	ARPS*SPSTTWHRPASPCPS*PGPGHALPPKPPS*PR	5	761.746	8	A	38.93	7.44556e+09	7.2317e+09	1.09276e+10	8.32041e+09	7.33863e+09	9.624e+09	0.0206059	0.191558	mouse
892	2010	1.05721e+09	A	0.239421	Map7d1;Map7d1	RPRC1;RPRC1 iso 2	§468; 431	MAP7 domain-containing protein 1	MA7D1_MOUSE|A2AJI0;MA7D1_MOUSE|A2AJI0-2	http://www.phosphosite.org/proteinAction.do?id=23650&showAllSites=true	ARPS*SPSTTWHR	3	488.224	5	A	23.4725	6.02421e+08	8.01904e+08	1.23619e+09	8.78224e+08	7.02162e+08	1.05721e+09	0.200888	0.239421	mouse
893	2011	9.624e+09	A	0.191558	Map7d1;Map7d1	RPRC1;RPRC1 iso 2	§469, §471, §496; 432, 434, 459	MAP7 domain-containing protein 1	MA7D1_MOUSE|A2AJI0;MA7D1_MOUSE|A2AJI0-2	http://www.phosphosite.org/proteinAction.do?id=23650&showAllSites=true	ARPSS*PS*TTWHRPASPCPSPGPGHALPPKPPS*PR	5	761.746	1	A	38.93	7.44556e+09	7.2317e+09	1.09276e+10	8.32041e+09	7.33863e+09	9.624e+09	0.0206059	0.191558	mouse
894	2012	1.42427e+08	A	0.0947999	Map7d1;Map7d1	RPRC1;RPRC1 iso 2	§469, §472; 432, 435	MAP7 domain-containing protein 1	MA7D1_MOUSE|A2AJI0;MA7D1_MOUSE|A2AJI0-2	http://www.phosphosite.org/proteinAction.do?id=23650&showAllSites=true	ARPSS*PST*TWHRPASPCPSPGPGH	3	895.379	1	A	31.35	1.3288e+08	1.51975e+08	1.3302e+08	1.30322e+08	1.42427e+08	1.31671e+08	0.0947999	0.014488	mouse
895	2013	10791898	A	0.672515	Map7d1;Map7d1	RPRC1;RPRC1 iso 2	§469, §473; 432, 436	MAP7 domain-containing protein 1	MA7D1_MOUSE|A2AJI0;MA7D1_MOUSE|A2AJI0-2	http://www.phosphosite.org/proteinAction.do?id=23650&showAllSites=true	PSS*PSTT*WHRPASPCPSPGPGHALPPKPPSPR	4	875.155	1	A	40.81	8013511		15923880	5659916	8013511	10791898		0.672515	mouse
896	2022	9.624e+09	A	0.191558	Map7d1;Map7d1	RPRC1;RPRC1 iso 2	§469, §479, §496; 432, 442, 459	MAP7 domain-containing protein 1	MA7D1_MOUSE|A2AJI0;MA7D1_MOUSE|A2AJI0-2	http://www.phosphosite.org/proteinAction.do?id=23650&showAllSites=true	ARPSS*PSTTWHRPAS*PCPSPGPGHALPPKPPS*PR	5	761.746	27	A	38.93	7.44556e+09	7.2317e+09	1.09276e+10	8.32041e+09	7.33863e+09	9.624e+09	0.0206059	0.191558	mouse
897	2029	1.43368e+10	A	0.184751	Map7d1;Map7d1	RPRC1;RPRC1 iso 2	§469, §479; 432, 442	MAP7 domain-containing protein 1	MA7D1_MOUSE|A2AJI0;MA7D1_MOUSE|A2AJI0-2	http://www.phosphosite.org/proteinAction.do?id=23650&showAllSites=true	ARPSS*PSTTWHRPAS*PCPSPGPGHALPPKPPSPR	5	745.753	12	A	35.69	9.25882e+09	9.47381e+09	1.62097e+10	1.24639e+10	9.36631e+09	1.43368e+10	0.0162305	0.184751	mouse
898	2034	6.87128e+09	A	0.0795156	Map7d1;Map7d1	RPRC1;RPRC1 iso 2	§469, §483, §496; 432, 446, 459	MAP7 domain-containing protein 1	MA7D1_MOUSE|A2AJI0;MA7D1_MOUSE|A2AJI0-2	http://www.phosphosite.org/proteinAction.do?id=23650&showAllSites=true	ARPSS*PSTTWHRPASPCPS*PGPGHALPPKPPS*PR	4	951.931	6	A	41.69	7.07919e+09	6.66338e+09	7.04419e+09	6.29423e+09	6.87128e+09	6.66921e+09	0.0427896	0.0795156	mouse
899	2037	1.70745e+09	A	0.0800609	Map7d1;Map7d1	RPRC1;RPRC1 iso 2	§469, §483; 432, 446	MAP7 domain-containing protein 1	MA7D1_MOUSE|A2AJI0;MA7D1_MOUSE|A2AJI0-2	http://www.phosphosite.org/proteinAction.do?id=23650&showAllSites=true	ARPSS*PSTTWHRPASPCPS*PGPGHALPPKPPSPR	4	931.939	2	A	37.165	1.37075e+09	1.23227e+09	1.80411e+09	1.61079e+09	1.30151e+09	1.70745e+09	0.0752405	0.0800609	mouse
900	2041	1.05721e+09	A	0.239421	Map7d1;Map7d1	RPRC1;RPRC1 iso 2	§469; 432	MAP7 domain-containing protein 1	MA7D1_MOUSE|A2AJI0;MA7D1_MOUSE|A2AJI0-2	http://www.phosphosite.org/proteinAction.do?id=23650&showAllSites=true	ARPSS*PSTTWHR	3	488.224	8	A	23.4725	6.02421e+08	8.01904e+08	1.23619e+09	8.78224e+08	7.02162e+08	1.05721e+09	0.200888	0.239421	mouse
901	2043	6.87128e+09	A	0.0795156	Map7d1;Map7d1	RPRC1;RPRC1 iso 2	§471, §472, §496; 434, 435, 459	MAP7 domain-containing protein 1	MA7D1_MOUSE|A2AJI0;MA7D1_MOUSE|A2AJI0-2	http://www.phosphosite.org/proteinAction.do?id=23650&showAllSites=true	ARPSSPS*T*TWHRPASPCPSPGPGHALPPKPPS*PR	4	951.931	1	A	41.69	7.07919e+09	6.66338e+09	7.04419e+09	6.29423e+09	6.87128e+09	6.66921e+09	0.0427896	0.0795156	mouse
902	2044	1.43368e+10	A	0.184751	Map7d1;Map7d1	RPRC1;RPRC1 iso 2	§471, §472; 434, 435	MAP7 domain-containing protein 1	MA7D1_MOUSE|A2AJI0;MA7D1_MOUSE|A2AJI0-2	http://www.phosphosite.org/proteinAction.do?id=23650&showAllSites=true	ARPSSPS*T*TWHRPASPCPSPGPGHALPPKPPSPR	5	745.753	1	A	35.69	9.25882e+09	9.47381e+09	1.62097e+10	1.24639e+10	9.36631e+09	1.43368e+10	0.0162305	0.184751	mouse
903	2048	1.34426e+08	A	0.354156	Map7d1;Map7d1	RPRC1;RPRC1 iso 2	§471, §473, §483, §496; 434, 436, 446, 459	MAP7 domain-containing protein 1	MA7D1_MOUSE|A2AJI0;MA7D1_MOUSE|A2AJI0-2	http://www.phosphosite.org/proteinAction.do?id=23650&showAllSites=true	ARPSSPS*TT*WHRPASPCPS*PGPGHALPPKPPS*PR	5	777.74	9	A	44.7633	1.0992e+08	7.55274e+07	1.68089e+08	1.00762e+08	9.27237e+07	1.34426e+08	0.262277	0.354156	mouse
904	2050	9.624e+09	A	0.191558	Map7d1;Map7d1	RPRC1;RPRC1 iso 2	§471, §473, §496; 434, 436, 459	MAP7 domain-containing protein 1	MA7D1_MOUSE|A2AJI0;MA7D1_MOUSE|A2AJI0-2	http://www.phosphosite.org/proteinAction.do?id=23650&showAllSites=true	ARPSSPS*TT*WHRPASPCPSPGPGHALPPKPPS*PR	5	761.746	3	A	38.93	7.44556e+09	7.2317e+09	1.09276e+10	8.32041e+09	7.33863e+09	9.624e+09	0.0206059	0.191558	mouse
905	2054	1.34426e+08	A	0.354156	Map7d1;Map7d1	RPRC1;RPRC1 iso 2	§471, §479, §483, §496; 434, 442, 446, 459	MAP7 domain-containing protein 1	MA7D1_MOUSE|A2AJI0;MA7D1_MOUSE|A2AJI0-2	http://www.phosphosite.org/proteinAction.do?id=23650&showAllSites=true	ARPSSPS*TTWHRPAS*PCPS*PGPGHALPPKPPS*PR	5	777.74	10	A	44.7633	1.0992e+08	7.55274e+07	1.68089e+08	1.00762e+08	9.27237e+07	1.34426e+08	0.262277	0.354156	mouse
906	2055	9.624e+09	A	0.191558	Map7d1;Map7d1	RPRC1;RPRC1 iso 2	§471, §479, §496; 434, 442, 459	MAP7 domain-containing protein 1	MA7D1_MOUSE|A2AJI0;MA7D1_MOUSE|A2AJI0-2	http://www.phosphosite.org/proteinAction.do?id=23650&showAllSites=true	ARPSSPS*TTWHRPAS*PCPSPGPGHALPPKPPS*PR	5	761.746	2	A	38.93	7.44556e+09	7.2317e+09	1.09276e+10	8.32041e+09	7.33863e+09	9.624e+09	0.0206059	0.191558	mouse
907	2062	1.43368e+10	A	0.184751	Map7d1;Map7d1	RPRC1;RPRC1 iso 2	§471, §479; 434, 442	MAP7 domain-containing protein 1	MA7D1_MOUSE|A2AJI0;MA7D1_MOUSE|A2AJI0-2	http://www.phosphosite.org/proteinAction.do?id=23650&showAllSites=true	ARPSSPS*TTWHRPAS*PCPSPGPGHALPPKPPSPR	5	745.753	11	A	35.69	9.25882e+09	9.47381e+09	1.62097e+10	1.24639e+10	9.36631e+09	1.43368e+10	0.0162305	0.184751	mouse
908	2066	309931648	A	0.641984	Map7d1;Map7d1	RPRC1;RPRC1 iso 2	§471, §483, §496; 434, 446, 459	MAP7 domain-containing protein 1	MA7D1_MOUSE|A2AJI0;MA7D1_MOUSE|A2AJI0-2	http://www.phosphosite.org/proteinAction.do?id=23650&showAllSites=true	ARPSSPS*TTWHRPASPCPS*PGPGHALPPKPPS*PR	6	634.956	3	A	39.915	279826752	105092224	330297280	289566016	192459488	309931648	0.641984	0.0929281	mouse
909	2068	1.43368e+10	A	0.184751	Map7d1;Map7d1	RPRC1;RPRC1 iso 2	§471, §483; 434, 446	MAP7 domain-containing protein 1	MA7D1_MOUSE|A2AJI0;MA7D1_MOUSE|A2AJI0-2	http://www.phosphosite.org/proteinAction.do?id=23650&showAllSites=true	ARPSSPS*TTWHRPASPCPS*PGPGHALPPKPPSPR	5	745.753	3	A	35.69	9.25882e+09	9.47381e+09	1.62097e+10	1.24639e+10	9.36631e+09	1.43368e+10	0.0162305	0.184751	mouse
910	2071	8.03519e+08	A	0.408907	Map7d1;Map7d1	RPRC1;RPRC1 iso 2	§472, §473, §483, §496; 435, 436, 446, 459	MAP7 domain-containing protein 1	MA7D1_MOUSE|A2AJI0;MA7D1_MOUSE|A2AJI0-2	http://www.phosphosite.org/proteinAction.do?id=23650&showAllSites=true	ARPSSPST*T*WHRPASPCPS*PGPGHALPPKPPS*PR	4	971.923	6	A	45.2675	4.82963e+08	8.75852e+08	8.51169e+08	7.55869e+08	6.79408e+08	8.03519e+08	0.408907	0.0838649	mouse
911	2072	10791898	A	0.672515	Map7d1;Map7d1	RPRC1;RPRC1 iso 2	§472, §473; 435, 436	MAP7 domain-containing protein 1	MA7D1_MOUSE|A2AJI0;MA7D1_MOUSE|A2AJI0-2	http://www.phosphosite.org/proteinAction.do?id=23650&showAllSites=true	PSSPST*T*WHRPASPCPSPGPGHALPPKPPSPR	4	875.155	1	A	40.81	8013511		15923880	5659916	8013511	10791898		0.672515	mouse
912	2073	8.03519e+08	A	0.408907	Map7d1;Map7d1	RPRC1;RPRC1 iso 2	§472, §479, §483, §496; 435, 442, 446, 459	MAP7 domain-containing protein 1	MA7D1_MOUSE|A2AJI0;MA7D1_MOUSE|A2AJI0-2	http://www.phosphosite.org/proteinAction.do?id=23650&showAllSites=true	ARPSSPST*TWHRPAS*PCPS*PGPGHALPPKPPS*PR	4	971.923	2	A	45.2675	4.82963e+08	8.75852e+08	8.51169e+08	7.55869e+08	6.79408e+08	8.03519e+08	0.408907	0.0838649	mouse
913	2085	1.43368e+10	A	0.184751	Map7d1;Map7d1	RPRC1;RPRC1 iso 2	§472, §479; 435, 442	MAP7 domain-containing protein 1	MA7D1_MOUSE|A2AJI0;MA7D1_MOUSE|A2AJI0-2	http://www.phosphosite.org/proteinAction.do?id=23650&showAllSites=true	ARPSSPST*TWHRPAS*PCPSPGPGHALPPKPPSPR	5	745.753	32	A	35.69	9.25882e+09	9.47381e+09	1.62097e+10	1.24639e+10	9.36631e+09	1.43368e+10	0.0162305	0.184751	mouse
914	2087	6.87128e+09	A	0.0795156	Map7d1;Map7d1	RPRC1;RPRC1 iso 2	§472, §483, §496; 435, 446, 459	MAP7 domain-containing protein 1	MA7D1_MOUSE|A2AJI0;MA7D1_MOUSE|A2AJI0-2	http://www.phosphosite.org/proteinAction.do?id=23650&showAllSites=true	ARPSSPST*TWHRPASPCPS*PGPGHALPPKPPS*PR	4	951.931	2	A	41.69	7.07919e+09	6.66338e+09	7.04419e+09	6.29423e+09	6.87128e+09	6.66921e+09	0.0427896	0.0795156	mouse
915	2089	6.08568e+07	A	0.226995	Map7d1;Map7d1	RPRC1;RPRC1 iso 2	§472; 435	MAP7 domain-containing protein 1	MA7D1_MOUSE|A2AJI0;MA7D1_MOUSE|A2AJI0-2	http://www.phosphosite.org/proteinAction.do?id=23650&showAllSites=true	ARPSSPST*TWHR	2	731.833	1	A	22.14	4.08907e+07	5.65273e+07	6.80331e+07	5.36805e+07	4.8709e+07	6.08568e+07	0.226995	0.166765	mouse
916	2092	8.03519e+08	A	0.408907	Map7d1;Map7d1	RPRC1;RPRC1 iso 2	§473, §479, §483, §496; 436, 442, 446, 459	MAP7 domain-containing protein 1	MA7D1_MOUSE|A2AJI0;MA7D1_MOUSE|A2AJI0-2	http://www.phosphosite.org/proteinAction.do?id=23650&showAllSites=true	ARPSSPSTT*WHRPAS*PCPS*PGPGHALPPKPPS*PR	4	971.923	9	A	45.2675	4.82963e+08	8.75852e+08	8.51169e+08	7.55869e+08	6.79408e+08	8.03519e+08	0.408907	0.0838649	mouse
917	2097	9.624e+09	A	0.191558	Map7d1;Map7d1	RPRC1;RPRC1 iso 2	§473, §479, §496; 436, 442, 459	MAP7 domain-containing protein 1	MA7D1_MOUSE|A2AJI0;MA7D1_MOUSE|A2AJI0-2	http://www.phosphosite.org/proteinAction.do?id=23650&showAllSites=true	ARPSSPSTT*WHRPAS*PCPSPGPGHALPPKPPS*PR	5	761.746	6	A	38.93	7.44556e+09	7.2317e+09	1.09276e+10	8.32041e+09	7.33863e+09	9.624e+09	0.0206059	0.191558	mouse
918	2110	1.43368e+10	A	0.184751	Map7d1;Map7d1	RPRC1;RPRC1 iso 2	§473, §479; 436, 442	MAP7 domain-containing protein 1	MA7D1_MOUSE|A2AJI0;MA7D1_MOUSE|A2AJI0-2	http://www.phosphosite.org/proteinAction.do?id=23650&showAllSites=true	ARPSSPSTT*WHRPAS*PCPSPGPGHALPPKPPSPR	5	745.753	36	A	35.69	9.25882e+09	9.47381e+09	1.62097e+10	1.24639e+10	9.36631e+09	1.43368e+10	0.0162305	0.184751	mouse
919	2118	6.87128e+09	A	0.0795156	Map7d1;Map7d1	RPRC1;RPRC1 iso 2	§473, §483, §496; 436, 446, 459	MAP7 domain-containing protein 1	MA7D1_MOUSE|A2AJI0;MA7D1_MOUSE|A2AJI0-2	http://www.phosphosite.org/proteinAction.do?id=23650&showAllSites=true	ARPSSPSTT*WHRPASPCPS*PGPGHALPPKPPS*PR	4	951.931	7	A	41.69	7.07919e+09	6.66338e+09	7.04419e+09	6.29423e+09	6.87128e+09	6.66921e+09	0.0427896	0.0795156	mouse
920	2124	2265284992	A	0.153361	Map7d1;Map7d1	RPRC1;RPRC1 iso 2	§473, §483; 436, 446	MAP7 domain-containing protein 1	MA7D1_MOUSE|A2AJI0;MA7D1_MOUSE|A2AJI0-2	http://www.phosphosite.org/proteinAction.do?id=23650&showAllSites=true	ARPSSPSTT*WHRPASPCPS*PGPGHALPPKPPSPR	6	621.629	5	A	39.3867	1406664448	1150622720	2510938368	2019631616	1278643584	2265284992	0.141594	0.153361	mouse
921	2127	9.624e+09	A	0.191558	Map7d1;Map7d1	RPRC1;RPRC1 iso 2	§479, §483, §496; 442, 446, 459	MAP7 domain-containing protein 1	MA7D1_MOUSE|A2AJI0;MA7D1_MOUSE|A2AJI0-2	http://www.phosphosite.org/proteinAction.do?id=23650&showAllSites=true	ARPSSPSTTWHRPAS*PCPS*PGPGHALPPKPPS*PR	5	761.746	13	A	38.93	7.44556e+09	7.2317e+09	1.09276e+10	8.32041e+09	7.33863e+09	9.624e+09	0.0206059	0.191558	mouse
922	2134	2265284992	A	0.153361	Map7d1;Map7d1	RPRC1;RPRC1 iso 2	§479, §483; 442, 446	MAP7 domain-containing protein 1	MA7D1_MOUSE|A2AJI0;MA7D1_MOUSE|A2AJI0-2	http://www.phosphosite.org/proteinAction.do?id=23650&showAllSites=true	ARPSSPSTTWHRPAS*PCPS*PGPGHALPPKPPSPR	6	621.629	8	A	39.3867	1406664448	1150622720	2510938368	2019631616	1278643584	2265284992	0.141594	0.153361	mouse
923	2145	6.484e+08	A	0.0618443	Map7d1;Map7d1	RPRC1;RPRC1 iso 2	§479, §496; 442, 459	MAP7 domain-containing protein 1	MA7D1_MOUSE|A2AJI0;MA7D1_MOUSE|A2AJI0-2	http://www.phosphosite.org/proteinAction.do?id=23650&showAllSites=true	PAS*PCPSPGPGHALPPKPPS*PR	3	787.692	47	A	39.65	6.15852e+08	6.72178e+08	6.72844e+08	6.23957e+08	6.44015e+08	6.484e+08	0.0618443	0.0533136	mouse
924	2157	2.60208e+08	A	0.132232	Map7d1;Map7d1	RPRC1;RPRC1 iso 2	§479; 442	MAP7 domain-containing protein 1	MA7D1_MOUSE|A2AJI0;MA7D1_MOUSE|A2AJI0-2	http://www.phosphosite.org/proteinAction.do?id=23650&showAllSites=true	PAS*PCPSPGPGHALPPKPPSPR	3	761.036	56	A	36.05	1.67822e+08	2.02443e+08	2.63015e+08	2.57402e+08	1.85133e+08	2.60208e+08	0.132232	0.015254	mouse
925	2167	1.86212e+08	A	0.264987	Map7d1;Map7d1	RPRC1;RPRC1 iso 2	§483; 446	MAP7 domain-containing protein 1	MA7D1_MOUSE|A2AJI0;MA7D1_MOUSE|A2AJI0-2	http://www.phosphosite.org/proteinAction.do?id=23650&showAllSites=true	PASPCPS*PGPGHALPPKPPSPR	4	571.029	5	A	36.3875	1.01207e+08	1.0891e+08	2.21103e+08	1.51321e+08	1.05059e+08	1.86212e+08	0.05185	0.264987	mouse
926	2169	2.89669e+07	A	0.0844399	Map7d1;Map7d1	RPRC1;RPRC1 iso 2	§496; 459	MAP7 domain-containing protein 1	MA7D1_MOUSE|A2AJI0;MA7D1_MOUSE|A2AJI0-2	http://www.phosphosite.org/proteinAction.do?id=23650&showAllSites=true	ALPPKPPS*PR	3	380.537	5	A	28.2925	2.15013e+07	2.42319e+07	2.90299e+07	2.8904e+07	2.28666e+07	2.89669e+07	0.0844399	0.00307342	mouse
927	2172	4746207	A	0.429778	Mapre2	RP1	40, 42, 44	Microtubule-associated protein RP/EB family member 2	MARE2_MOUSE|Q8R001-2	http://www.phosphosite.org/proteinAction.do?id=2773&showAllSites=true	NWGMAVNVYS*TS*IT*QETMSR	3	838.987	1	A	40.75	4249241	5243173	2960060	5544626	4746207	4252343	0.14808	0.429778	mouse
928	2176	7.2026e+08	A	0.214758	Nes;Nes	nestin;nestin iso 2	§688; §688	Nestin	NEST_MOUSE|Q6P5H2;NEST_MOUSE|Q6P5H2-2	http://www.phosphosite.org/proteinAction.do?id=6702&showAllSites=true	EDQRFPRS*PEEDQQAFRPLEK	4	671.313	29	A	48.6875	7.50222e+08	6.90299e+08	4.51295e+08	3.323e+08	7.2026e+08	3.91797e+08	0.0588287	0.214758	mouse
929	2183	45055384	A	0.0607147	Palld;Palld;Palld;Palld;Palld;Palld	palladin;palladin iso 2;palladin iso 3;palladin iso 4;palladin iso 5;palladin iso 6	§1126, §1129; 884, 887; 381, 384; 720, 723; 388, 391; 1109, 1112	Palladin	PALLD_MOUSE|Q9ET54;PALLD_MOUSE|Q9ET54-2;PALLD_MOUSE|Q9ET54-3;PALLD_MOUSE|Q9ET54-4;PALLD_MOUSE|Q9ET54-5;PALLD_MOUSE|Q9ET54-6	http://www.phosphosite.org/proteinAction.do?id=10414&showAllSites=true	GRS*PRS*PSGHPHAR	3	553.573	5	A	11.58	43121076	46989692	37424416	36041944	45055384	36733180	0.0607147	0.0266123	mouse
930	2185	1.59222e+07	A	0.0562941	Palld;Palld;Palld;Palld;Palld;Palld	palladin;palladin iso 2;palladin iso 3;palladin iso 4;palladin iso 5;palladin iso 6	§1126; 884; 381; 720; 388; 1109	Palladin	PALLD_MOUSE|Q9ET54;PALLD_MOUSE|Q9ET54-2;PALLD_MOUSE|Q9ET54-3;PALLD_MOUSE|Q9ET54-4;PALLD_MOUSE|Q9ET54-5;PALLD_MOUSE|Q9ET54-6	http://www.phosphosite.org/proteinAction.do?id=10414&showAllSites=true	S*PRSPSGHPHAR	4	342.16	1	A	11.22	9.75803e+06		1.6556e+07	1.52884e+07	9.75803e+06	1.59222e+07		0.0562941	mouse
931	2195	3.38337e+07	A	0.0992612	Palld;Palld;Palld;Palld;Palld;Palld	palladin;palladin iso 2;palladin iso 3;palladin iso 4;palladin iso 5;palladin iso 6	§1129; 887; 384; 723; 391; 1112	Palladin	PALLD_MOUSE|Q9ET54;PALLD_MOUSE|Q9ET54-2;PALLD_MOUSE|Q9ET54-3;PALLD_MOUSE|Q9ET54-4;PALLD_MOUSE|Q9ET54-5;PALLD_MOUSE|Q9ET54-6	http://www.phosphosite.org/proteinAction.do?id=10414&showAllSites=true	SPRS*PSGHPHAR	3	455.877	25	A	8.345	2.02778e+07		3.14589e+07	3.62084e+07	2.02778e+07	3.38337e+07		0.0992612	mouse
932	2199	1.52158e+08	A	0.3629	Palld;Palld;Palld;Palld;Palld;Palld	palladin;palladin iso 2;palladin iso 3;palladin iso 4;palladin iso 5;palladin iso 6	§1141, §1143, §1146; 899, §901, 904; 396, 398, 401; 735, 737, 740; 403, 405, 408; 1124, §1126, §1129	Palladin	PALLD_MOUSE|Q9ET54;PALLD_MOUSE|Q9ET54-2;PALLD_MOUSE|Q9ET54-3;PALLD_MOUSE|Q9ET54-4;PALLD_MOUSE|Q9ET54-5;PALLD_MOUSE|Q9ET54-6	http://www.phosphosite.org/proteinAction.do?id=10414&showAllSites=true	S*RS*RDS*GDENEPIQER	3	705.591	6	A	25.1933	7.3854e+07	6.48961e+07	1.91204e+08	1.13113e+08	6.93751e+07	1.52158e+08	0.0913033	0.3629	mouse
933	2203	1.17645e+08	A	0.142186	Palld;Palld;Palld;Palld;Palld;Palld	palladin;palladin iso 2;palladin iso 3;palladin iso 4;palladin iso 5;palladin iso 6	§1143, §1146; §901, 904; 398, 401; 737, 740; 405, 408; §1126, §1129	Palladin	PALLD_MOUSE|Q9ET54;PALLD_MOUSE|Q9ET54-2;PALLD_MOUSE|Q9ET54-3;PALLD_MOUSE|Q9ET54-4;PALLD_MOUSE|Q9ET54-5;PALLD_MOUSE|Q9ET54-6	http://www.phosphosite.org/proteinAction.do?id=10414&showAllSites=true	SRS*RDS*GDENEPIQER	3	678.935	10	A	22.87	7.53523e+07	8.39616e+07	1.29474e+08	1.05817e+08	7.9657e+07	1.17645e+08	0.0764244	0.142186	mouse
934	2204	4.57889e+06	A	0.0940443	Palld;Palld;Palld;Palld;Palld;Palld	palladin;palladin iso 2;palladin iso 3;palladin iso 4;palladin iso 5;palladin iso 6	§1143; §901; 398; 737; 405; §1126	Palladin	PALLD_MOUSE|Q9ET54;PALLD_MOUSE|Q9ET54-2;PALLD_MOUSE|Q9ET54-3;PALLD_MOUSE|Q9ET54-4;PALLD_MOUSE|Q9ET54-5;PALLD_MOUSE|Q9ET54-6	http://www.phosphosite.org/proteinAction.do?id=10414&showAllSites=true	S*RDSGDENEPIQER	2	856.35	1	A	21.83	2.82645e+06	2.94561e+06	4.2744e+06	4.88338e+06	2.88603e+06	4.57889e+06	0.0291948	0.0940443	mouse
935	2207	1.10051e+07	A	0.0793403	Palld;Palld;Palld;Palld;Palld;Palld	palladin;palladin iso 2;palladin iso 3;palladin iso 4;palladin iso 5;palladin iso 6	§1146; 904; 401; 740; 408; §1129	Palladin	PALLD_MOUSE|Q9ET54;PALLD_MOUSE|Q9ET54-2;PALLD_MOUSE|Q9ET54-3;PALLD_MOUSE|Q9ET54-4;PALLD_MOUSE|Q9ET54-5;PALLD_MOUSE|Q9ET54-6	http://www.phosphosite.org/proteinAction.do?id=10414&showAllSites=true	SRDS*GDENEPIQER	3	571.236	6	A	26.1	6.9009e+06	6.24373e+06	1.16225e+07	1.03877e+07	6.57232e+06	1.10051e+07	0.0707039	0.0793403	mouse
936	2211	7.02814e+08	A	0.0827587	Pbxip1	PBXIP1	§164	Pre-B-cell leukemia transcription factor-interacting protein 1	PBIP1_MOUSE|Q3TVI8	http://www.phosphosite.org/proteinAction.do?id=17231&showAllSites=true	GREPS*SSQPVVPVDVEDQAK	3	735.346	8	A	47.9825	5.41081e+08	6.08344e+08	7.30798e+08	6.74831e+08	5.74712e+08	7.02814e+08	0.0827587	0.0563094	mouse
937	2213	4.84948e+07	A	0.290918	Pbxip1	PBXIP1	§165	Pre-B-cell leukemia transcription factor-interacting protein 1	PBIP1_MOUSE|Q3TVI8	http://www.phosphosite.org/proteinAction.do?id=17231&showAllSites=true	GREPSS*SQPVVPVDVEDQAK	2	1102.52	6	A	51.4433	3.76364e+07	4.53642e+07	5.84707e+07	3.85189e+07	4.15003e+07	4.84948e+07	0.131671	0.290918	mouse
938	2217	7.02814e+08	A	0.0827587	Pbxip1	PBXIP1	§166	Pre-B-cell leukemia transcription factor-interacting protein 1	PBIP1_MOUSE|Q3TVI8	http://www.phosphosite.org/proteinAction.do?id=17231&showAllSites=true	GREPSSS*QPVVPVDVEDQAK	3	735.346	9	A	47.9825	5.41081e+08	6.08344e+08	7.30798e+08	6.74831e+08	5.74712e+08	7.02814e+08	0.0827587	0.0563094	mouse
939	2218	6.83784e+06	A	0.682959	Pdlim3	PDLIM3	178, 183	PDZ and LIM domain protein 3	PDLI3_MOUSE|O70209	http://www.phosphosite.org/proteinAction.do?id=6275103&showAllSites=true	TAS*VPPQS*DVYR	3	493.869	1	A	44.45	3.91251e+06	2.61581e+06	1.014e+07	3.53568e+06	3.26416e+06	6.83784e+06	0.2809	0.682959	mouse
940	2219	7.07861e+07	A	0.21432	Pdlim4	RIL	§107	PDZ and LIM domain protein 4	PDLI4_MOUSE|P70271	http://www.phosphosite.org/proteinAction.do?id=8747&showAllSites=true	IHIDPES*QDCSPATSR	2	946.896	2	A	35.395	6.46355e+07	7.48815e+07	8.15135e+07	6.00587e+07	6.97585e+07	7.07861e+07	0.103858	0.21432	mouse
941	2223	2.44972e+07	A	0.251204	Pdlim4	RIL	§107, §111	PDZ and LIM domain protein 4	PDLI4_MOUSE|P70271	http://www.phosphosite.org/proteinAction.do?id=8747&showAllSites=true	IHIDPES*QDCS*PATSR	3	658.255	8	A	42.9075	1.69937e+07	2.14596e+07	2.88486e+07	2.01458e+07	1.92266e+07	2.44972e+07	0.164244	0.251204	mouse
942	2225	2.52041e+08	A	0.314385	Pdlim4	RIL	§111	PDZ and LIM domain protein 4	PDLI4_MOUSE|P70271	http://www.phosphosite.org/proteinAction.do?id=8747&showAllSites=true	IHIDPESQDCS*PATSR	3	631.6	7	A	35.835	2.30381e+08	2.41144e+08	3.08071e+08	1.96012e+08	2.35762e+08	2.52041e+08	0.0322794	0.314385	mouse
943	2226	2.7669e+07	A	0.23586	Pdlim4	RIL	§118	PDZ and LIM domain protein 4	PDLI4_MOUSE|P70271	http://www.phosphosite.org/proteinAction.do?id=8747&showAllSites=true	S*SVSGISLEDNR	2	672.296	2	A	46.895	2.30545e+07	3.22836e+07	2.20521e+07	2.55209e+07	2.7669e+07	2.37865e+07	0.23586	0.10312	mouse
944	2228	1.33991e+08	A	0.214067	Pdlim4	RIL	§119	PDZ and LIM domain protein 4	PDLI4_MOUSE|P70271	http://www.phosphosite.org/proteinAction.do?id=8747&showAllSites=true	RSS*VSGISLEDNR	3	500.567	6	A	38.8833	9.65669e+07	1.06171e+08	1.54273e+08	1.13709e+08	1.01369e+08	1.33991e+08	0.066994	0.214067	mouse
945	2230	2.08368e+07	A	0.167951	Pdlim4	RIL	§119, §121	PDZ and LIM domain protein 4	PDLI4_MOUSE|P70271	http://www.phosphosite.org/proteinAction.do?id=8747&showAllSites=true	RSS*VS*GISLEDNR	2	790.329	1	A	42.55	1.66491e+07	2.11365e+07	2.15494e+07	2.01241e+07	1.88928e+07	2.08368e+07	0.167951	0.04837	mouse
946	2231	1.33991e+08	A	0.214067	Pdlim4	RIL	§121	PDZ and LIM domain protein 4	PDLI4_MOUSE|P70271	http://www.phosphosite.org/proteinAction.do?id=8747&showAllSites=true	RSSVS*GISLEDNR	3	500.567	3	A	38.8833	9.65669e+07	1.06171e+08	1.54273e+08	1.13709e+08	1.01369e+08	1.33991e+08	0.066994	0.214067	mouse
947	2232	4.08848e+07	A	0.0290202	Pdlim4	RIL	§134	PDZ and LIM domain protein 4	PDLI4_MOUSE|P70271	http://www.phosphosite.org/proteinAction.do?id=8747&showAllSites=true	SGLGS*PYGQPPR	2	648.293	4	A	41.6925	4.06475e+07	4.11221e+07	3.79324e+07	3.6407e+07	4.08848e+07	3.71697e+07	0.00820751	0.0290202	mouse
948	2233	1.80121e+08	A	0.1374	Pdlim7;Pdlim7	PDLIM7;PDLIM7 iso2 iso 2	§161; 127	PDZ and LIM domain protein 7	PDLI7_MOUSE|Q3TJD7;PDLI7_MOUSE|Q3TJD7-2	http://www.phosphosite.org/proteinAction.do?id=6275104&showAllSites=true	LMEDTEDWRPRPGT*GQSR	3	737.66	2	A	41.99	1.01376e+08	1.22672e+08	1.97621e+08	1.62621e+08	1.12024e+08	1.80121e+08	0.134426	0.1374	mouse
949	2234	1.80121e+08	A	0.1374	Pdlim7;Pdlim7	PDLIM7;PDLIM7 iso2 iso 2	164; 130	PDZ and LIM domain protein 7	PDLI7_MOUSE|Q3TJD7;PDLI7_MOUSE|Q3TJD7-2	http://www.phosphosite.org/proteinAction.do?id=6275104&showAllSites=true	LMEDTEDWRPRPGTGQS*R	3	737.66	1	A	41.99	1.01376e+08	1.22672e+08	1.97621e+08	1.62621e+08	1.12024e+08	1.80121e+08	0.134426	0.1374	mouse
950	2235	1.21911e+08	A	0.233038	Plec;Plec;Plec;Plec;Plec;Plec;Plec;Plec;Plec;Plec;Plec;Plec;Plec;Plec;Plec;Plec	Plectin-1;Plectin-1 iso3 iso 2;Plectin-1 iso3 iso 3;Plectin-1 iso3 iso 4;Plectin-1 iso3 iso 5;Plectin-1 iso6 iso 6;Plectin-1 iso3 iso 7;Plectin-1 iso3 iso 8;Plectin-1 iso3 iso 9;Plectin-1 iso3 iso 10;Plectin-1 iso3 iso 11;Plectin-1 iso3 iso 12;Plectin-1 iso3 iso 13;Plectin-1 iso3 iso 14;Plectin-1 iso3 iso 15;Plectin-1 iso3 iso 16	§2893; 2888; 2745; 2750; 2745; 2774; 2779; 2791; 2718; 2713; 2728; 2723; 2736; 2752; 2651; 2746	Plectin	PLEC_MOUSE|Q9QXS1;PLEC_MOUSE|Q9QXS1-2;PLEC_MOUSE|Q9QXS1-3;PLEC_MOUSE|Q9QXS1-4;PLEC_MOUSE|Q9QXS1-5;PLEC_MOUSE|Q9QXS1-6;PLEC_MOUSE|Q9QXS1-7;PLEC_MOUSE|Q9QXS1-8;PLEC_MOUSE|Q9QXS1-9;PLEC_MOUSE|Q9QXS1-10;PLEC_MOUSE|Q9QXS1-11;PLEC_MOUSE|Q9QXS1-12;PLEC_MOUSE|Q9QXS1-13;PLEC_MOUSE|Q9QXS1-14;PLEC_MOUSE|Q9QXS1-15;PLEC_MOUSE|Q9QXS1-16	http://www.phosphosite.org/proteinAction.do?id=3451&showAllSites=true	RLT*VNEAVK	2	555.289	3	A	30.24	1.01822e+08	1.42e+08	1.0816e+08	1.06852e+08	1.21911e+08	1.07506e+08	0.233038	0.00860542	mouse
951	2237	2.5869e+07	A	0.14341	Plec;Plec;Plec;Plec;Plec;Plec;Plec;Plec;Plec;Plec;Plec;Plec;Plec;Plec;Plec;Plec	Plectin-1;Plectin-1 iso3 iso 2;Plectin-1 iso3 iso 3;Plectin-1 iso3 iso 4;Plectin-1 iso3 iso 5;Plectin-1 iso6 iso 6;Plectin-1 iso3 iso 7;Plectin-1 iso3 iso 8;Plectin-1 iso3 iso 9;Plectin-1 iso3 iso 10;Plectin-1 iso3 iso 11;Plectin-1 iso3 iso 12;Plectin-1 iso3 iso 13;Plectin-1 iso3 iso 14;Plectin-1 iso3 iso 15;Plectin-1 iso3 iso 16	§4393; 4388; 4245; 4250; 4245; 4274; 4279; 4291; 4218; 4213; 4228; 4223; 4236; 4252; 4151; 4246	Plectin	PLEC_MOUSE|Q9QXS1;PLEC_MOUSE|Q9QXS1-2;PLEC_MOUSE|Q9QXS1-3;PLEC_MOUSE|Q9QXS1-4;PLEC_MOUSE|Q9QXS1-5;PLEC_MOUSE|Q9QXS1-6;PLEC_MOUSE|Q9QXS1-7;PLEC_MOUSE|Q9QXS1-8;PLEC_MOUSE|Q9QXS1-9;PLEC_MOUSE|Q9QXS1-10;PLEC_MOUSE|Q9QXS1-11;PLEC_MOUSE|Q9QXS1-12;PLEC_MOUSE|Q9QXS1-13;PLEC_MOUSE|Q9QXS1-14;PLEC_MOUSE|Q9QXS1-15;PLEC_MOUSE|Q9QXS1-16	http://www.phosphosite.org/proteinAction.do?id=3451&showAllSites=true	SSS*VGSSSSYPISSAGPR	2	896.891	5	A	43.935	2.50932e+07	2.66447e+07	2.56278e+07	2.09088e+07	2.5869e+07	2.32683e+07	0.0424077	0.14341	mouse
952	2238	1.07144e+08	A	0.225782	Plec;Plec;Plec;Plec;Plec;Plec;Plec;Plec;Plec;Plec;Plec;Plec;Plec;Plec;Plec;Plec	Plectin-1;Plectin-1 iso3 iso 2;Plectin-1 iso3 iso 3;Plectin-1 iso3 iso 4;Plectin-1 iso3 iso 5;Plectin-1 iso6 iso 6;Plectin-1 iso3 iso 7;Plectin-1 iso3 iso 8;Plectin-1 iso3 iso 9;Plectin-1 iso3 iso 10;Plectin-1 iso3 iso 11;Plectin-1 iso3 iso 12;Plectin-1 iso3 iso 13;Plectin-1 iso3 iso 14;Plectin-1 iso3 iso 15;Plectin-1 iso3 iso 16	§4619, §4625; 4614, 4620; 4471, 4477; 4476, 4482; 4471, 4477; 4500, 4506; 4505, 4511; 4517, 4523; 4444, 4450; 4439, 4445; 4454, 4460; 4449, 4455; 4462, 4468; 4478, 4484; 4377, 4383; 4472, 4478	Plectin	PLEC_MOUSE|Q9QXS1;PLEC_MOUSE|Q9QXS1-2;PLEC_MOUSE|Q9QXS1-3;PLEC_MOUSE|Q9QXS1-4;PLEC_MOUSE|Q9QXS1-5;PLEC_MOUSE|Q9QXS1-6;PLEC_MOUSE|Q9QXS1-7;PLEC_MOUSE|Q9QXS1-8;PLEC_MOUSE|Q9QXS1-9;PLEC_MOUSE|Q9QXS1-10;PLEC_MOUSE|Q9QXS1-11;PLEC_MOUSE|Q9QXS1-12;PLEC_MOUSE|Q9QXS1-13;PLEC_MOUSE|Q9QXS1-14;PLEC_MOUSE|Q9QXS1-15;PLEC_MOUSE|Q9QXS1-16	http://www.phosphosite.org/proteinAction.do?id=3451&showAllSites=true	GYY*SPYSVS*GSGSTAGSR	2	971.866	1	A	51.23	5.75871e+07	6.16758e+07	1.2425e+08	9.0038e+07	5.96314e+07	1.07144e+08	0.0484845	0.225782	mouse
953	2239	1.07144e+08	A	0.225782	Plec;Plec;Plec;Plec;Plec;Plec;Plec;Plec;Plec;Plec;Plec;Plec;Plec;Plec;Plec;Plec	Plectin-1;Plectin-1 iso3 iso 2;Plectin-1 iso3 iso 3;Plectin-1 iso3 iso 4;Plectin-1 iso3 iso 5;Plectin-1 iso6 iso 6;Plectin-1 iso3 iso 7;Plectin-1 iso3 iso 8;Plectin-1 iso3 iso 9;Plectin-1 iso3 iso 10;Plectin-1 iso3 iso 11;Plectin-1 iso3 iso 12;Plectin-1 iso3 iso 13;Plectin-1 iso3 iso 14;Plectin-1 iso3 iso 15;Plectin-1 iso3 iso 16	§4620, §4629; 4615, 4624; 4472, 4481; 4477, 4486; 4472, 4481; 4501, 4510; 4506, 4515; 4518, 4527; 4445, 4454; 4440, 4449; 4455, 4464; 4450, 4459; 4463, 4472; 4479, 4488; 4378, 4387; 4473, 4482	Plectin	PLEC_MOUSE|Q9QXS1;PLEC_MOUSE|Q9QXS1-2;PLEC_MOUSE|Q9QXS1-3;PLEC_MOUSE|Q9QXS1-4;PLEC_MOUSE|Q9QXS1-5;PLEC_MOUSE|Q9QXS1-6;PLEC_MOUSE|Q9QXS1-7;PLEC_MOUSE|Q9QXS1-8;PLEC_MOUSE|Q9QXS1-9;PLEC_MOUSE|Q9QXS1-10;PLEC_MOUSE|Q9QXS1-11;PLEC_MOUSE|Q9QXS1-12;PLEC_MOUSE|Q9QXS1-13;PLEC_MOUSE|Q9QXS1-14;PLEC_MOUSE|Q9QXS1-15;PLEC_MOUSE|Q9QXS1-16	http://www.phosphosite.org/proteinAction.do?id=3451&showAllSites=true	GYYS*PYSVSGSGS*TAGSR	2	971.866	1	A	51.23	5.75871e+07	6.16758e+07	1.2425e+08	9.0038e+07	5.96314e+07	1.07144e+08	0.0484845	0.225782	mouse
954	2240	1.07144e+08	A	0.225782	Plec;Plec;Plec;Plec;Plec;Plec;Plec;Plec;Plec;Plec;Plec;Plec;Plec;Plec;Plec;Plec	Plectin-1;Plectin-1 iso3 iso 2;Plectin-1 iso3 iso 3;Plectin-1 iso3 iso 4;Plectin-1 iso3 iso 5;Plectin-1 iso6 iso 6;Plectin-1 iso3 iso 7;Plectin-1 iso3 iso 8;Plectin-1 iso3 iso 9;Plectin-1 iso3 iso 10;Plectin-1 iso3 iso 11;Plectin-1 iso3 iso 12;Plectin-1 iso3 iso 13;Plectin-1 iso3 iso 14;Plectin-1 iso3 iso 15;Plectin-1 iso3 iso 16	§4620, §4630; 4615, 4625; 4472, 4482; 4477, 4487; 4472, 4482; 4501, 4511; 4506, 4516; 4518, 4528; 4445, 4455; 4440, 4450; 4455, 4465; 4450, 4460; 4463, 4473; 4479, 4489; 4378, 4388; 4473, 4483	Plectin	PLEC_MOUSE|Q9QXS1;PLEC_MOUSE|Q9QXS1-2;PLEC_MOUSE|Q9QXS1-3;PLEC_MOUSE|Q9QXS1-4;PLEC_MOUSE|Q9QXS1-5;PLEC_MOUSE|Q9QXS1-6;PLEC_MOUSE|Q9QXS1-7;PLEC_MOUSE|Q9QXS1-8;PLEC_MOUSE|Q9QXS1-9;PLEC_MOUSE|Q9QXS1-10;PLEC_MOUSE|Q9QXS1-11;PLEC_MOUSE|Q9QXS1-12;PLEC_MOUSE|Q9QXS1-13;PLEC_MOUSE|Q9QXS1-14;PLEC_MOUSE|Q9QXS1-15;PLEC_MOUSE|Q9QXS1-16	http://www.phosphosite.org/proteinAction.do?id=3451&showAllSites=true	GYYS*PYSVSGSGST*AGSR	2	971.866	1	A	51.23	5.75871e+07	6.16758e+07	1.2425e+08	9.0038e+07	5.96314e+07	1.07144e+08	0.0484845	0.225782	mouse
955	2242	9.83468e+08	A	0.0663436	Plec;Plec;Plec;Plec;Plec;Plec;Plec;Plec;Plec;Plec;Plec;Plec;Plec;Plec;Plec;Plec	Plectin-1;Plectin-1 iso3 iso 2;Plectin-1 iso3 iso 3;Plectin-1 iso3 iso 4;Plectin-1 iso3 iso 5;Plectin-1 iso6 iso 6;Plectin-1 iso3 iso 7;Plectin-1 iso3 iso 8;Plectin-1 iso3 iso 9;Plectin-1 iso3 iso 10;Plectin-1 iso3 iso 11;Plectin-1 iso3 iso 12;Plectin-1 iso3 iso 13;Plectin-1 iso3 iso 14;Plectin-1 iso3 iso 15;Plectin-1 iso3 iso 16	§4620; 4615; 4472; 4477; 4472; 4501; 4506; 4518; 4445; 4440; 4455; 4450; 4463; 4479; 4378; 4473	Plectin	PLEC_MOUSE|Q9QXS1;PLEC_MOUSE|Q9QXS1-2;PLEC_MOUSE|Q9QXS1-3;PLEC_MOUSE|Q9QXS1-4;PLEC_MOUSE|Q9QXS1-5;PLEC_MOUSE|Q9QXS1-6;PLEC_MOUSE|Q9QXS1-7;PLEC_MOUSE|Q9QXS1-8;PLEC_MOUSE|Q9QXS1-9;PLEC_MOUSE|Q9QXS1-10;PLEC_MOUSE|Q9QXS1-11;PLEC_MOUSE|Q9QXS1-12;PLEC_MOUSE|Q9QXS1-13;PLEC_MOUSE|Q9QXS1-14;PLEC_MOUSE|Q9QXS1-15;PLEC_MOUSE|Q9QXS1-16	http://www.phosphosite.org/proteinAction.do?id=3451&showAllSites=true	GYYS*PYSVSGSGSTAGSR	2	931.883	8	A	48.02	6.86078e+08	7.44732e+08	1.0296e+09	9.37331e+08	7.15405e+08	9.83468e+08	0.0579735	0.0663436	mouse
956	2245	1.07144e+08	A	0.225782	Plec;Plec;Plec;Plec;Plec;Plec;Plec;Plec;Plec;Plec;Plec;Plec;Plec;Plec;Plec;Plec	Plectin-1;Plectin-1 iso3 iso 2;Plectin-1 iso3 iso 3;Plectin-1 iso3 iso 4;Plectin-1 iso3 iso 5;Plectin-1 iso6 iso 6;Plectin-1 iso3 iso 7;Plectin-1 iso3 iso 8;Plectin-1 iso3 iso 9;Plectin-1 iso3 iso 10;Plectin-1 iso3 iso 11;Plectin-1 iso3 iso 12;Plectin-1 iso3 iso 13;Plectin-1 iso3 iso 14;Plectin-1 iso3 iso 15;Plectin-1 iso3 iso 16	§4622, §4625; 4617, 4620; 4474, 4477; 4479, 4482; 4474, 4477; 4503, 4506; 4508, 4511; 4520, 4523; 4447, 4450; 4442, 4445; 4457, 4460; 4452, 4455; 4465, 4468; 4481, 4484; 4380, 4383; 4475, 4478	Plectin	PLEC_MOUSE|Q9QXS1;PLEC_MOUSE|Q9QXS1-2;PLEC_MOUSE|Q9QXS1-3;PLEC_MOUSE|Q9QXS1-4;PLEC_MOUSE|Q9QXS1-5;PLEC_MOUSE|Q9QXS1-6;PLEC_MOUSE|Q9QXS1-7;PLEC_MOUSE|Q9QXS1-8;PLEC_MOUSE|Q9QXS1-9;PLEC_MOUSE|Q9QXS1-10;PLEC_MOUSE|Q9QXS1-11;PLEC_MOUSE|Q9QXS1-12;PLEC_MOUSE|Q9QXS1-13;PLEC_MOUSE|Q9QXS1-14;PLEC_MOUSE|Q9QXS1-15;PLEC_MOUSE|Q9QXS1-16	http://www.phosphosite.org/proteinAction.do?id=3451&showAllSites=true	GYYSPY*SVS*GSGSTAGSR	2	971.866	2	A	51.23	5.75871e+07	6.16758e+07	1.2425e+08	9.0038e+07	5.96314e+07	1.07144e+08	0.0484845	0.225782	mouse
957	2246	1.07144e+08	A	0.225782	Plec;Plec;Plec;Plec;Plec;Plec;Plec;Plec;Plec;Plec;Plec;Plec;Plec;Plec;Plec;Plec	Plectin-1;Plectin-1 iso3 iso 2;Plectin-1 iso3 iso 3;Plectin-1 iso3 iso 4;Plectin-1 iso3 iso 5;Plectin-1 iso6 iso 6;Plectin-1 iso3 iso 7;Plectin-1 iso3 iso 8;Plectin-1 iso3 iso 9;Plectin-1 iso3 iso 10;Plectin-1 iso3 iso 11;Plectin-1 iso3 iso 12;Plectin-1 iso3 iso 13;Plectin-1 iso3 iso 14;Plectin-1 iso3 iso 15;Plectin-1 iso3 iso 16	§4622, §4629; 4617, 4624; 4474, 4481; 4479, 4486; 4474, 4481; 4503, 4510; 4508, 4515; 4520, 4527; 4447, 4454; 4442, 4449; 4457, 4464; 4452, 4459; 4465, 4472; 4481, 4488; 4380, 4387; 4475, 4482	Plectin	PLEC_MOUSE|Q9QXS1;PLEC_MOUSE|Q9QXS1-2;PLEC_MOUSE|Q9QXS1-3;PLEC_MOUSE|Q9QXS1-4;PLEC_MOUSE|Q9QXS1-5;PLEC_MOUSE|Q9QXS1-6;PLEC_MOUSE|Q9QXS1-7;PLEC_MOUSE|Q9QXS1-8;PLEC_MOUSE|Q9QXS1-9;PLEC_MOUSE|Q9QXS1-10;PLEC_MOUSE|Q9QXS1-11;PLEC_MOUSE|Q9QXS1-12;PLEC_MOUSE|Q9QXS1-13;PLEC_MOUSE|Q9QXS1-14;PLEC_MOUSE|Q9QXS1-15;PLEC_MOUSE|Q9QXS1-16	http://www.phosphosite.org/proteinAction.do?id=3451&showAllSites=true	GYYSPY*SVSGSGS*TAGSR	2	971.866	1	A	51.23	5.75871e+07	6.16758e+07	1.2425e+08	9.0038e+07	5.96314e+07	1.07144e+08	0.0484845	0.225782	mouse
958	2247	9.83468e+08	A	0.0663436	Plec;Plec;Plec;Plec;Plec;Plec;Plec;Plec;Plec;Plec;Plec;Plec;Plec;Plec;Plec;Plec	Plectin-1;Plectin-1 iso3 iso 2;Plectin-1 iso3 iso 3;Plectin-1 iso3 iso 4;Plectin-1 iso3 iso 5;Plectin-1 iso6 iso 6;Plectin-1 iso3 iso 7;Plectin-1 iso3 iso 8;Plectin-1 iso3 iso 9;Plectin-1 iso3 iso 10;Plectin-1 iso3 iso 11;Plectin-1 iso3 iso 12;Plectin-1 iso3 iso 13;Plectin-1 iso3 iso 14;Plectin-1 iso3 iso 15;Plectin-1 iso3 iso 16	§4622; 4617; 4474; 4479; 4474; 4503; 4508; 4520; 4447; 4442; 4457; 4452; 4465; 4481; 4380; 4475	Plectin	PLEC_MOUSE|Q9QXS1;PLEC_MOUSE|Q9QXS1-2;PLEC_MOUSE|Q9QXS1-3;PLEC_MOUSE|Q9QXS1-4;PLEC_MOUSE|Q9QXS1-5;PLEC_MOUSE|Q9QXS1-6;PLEC_MOUSE|Q9QXS1-7;PLEC_MOUSE|Q9QXS1-8;PLEC_MOUSE|Q9QXS1-9;PLEC_MOUSE|Q9QXS1-10;PLEC_MOUSE|Q9QXS1-11;PLEC_MOUSE|Q9QXS1-12;PLEC_MOUSE|Q9QXS1-13;PLEC_MOUSE|Q9QXS1-14;PLEC_MOUSE|Q9QXS1-15;PLEC_MOUSE|Q9QXS1-16	http://www.phosphosite.org/proteinAction.do?id=3451&showAllSites=true	GYYSPY*SVSGSGSTAGSR	2	931.883	4	A	48.02	6.86078e+08	7.44732e+08	1.0296e+09	9.37331e+08	7.15405e+08	9.83468e+08	0.0579735	0.0663436	mouse
959	2249	6.25568e+07	A	0.0303402	Plec;Plec;Plec;Plec;Plec;Plec;Plec;Plec;Plec;Plec;Plec;Plec;Plec;Plec;Plec;Plec	Plectin-1;Plectin-1 iso3 iso 2;Plectin-1 iso3 iso 3;Plectin-1 iso3 iso 4;Plectin-1 iso3 iso 5;Plectin-1 iso6 iso 6;Plectin-1 iso3 iso 7;Plectin-1 iso3 iso 8;Plectin-1 iso3 iso 9;Plectin-1 iso3 iso 10;Plectin-1 iso3 iso 11;Plectin-1 iso3 iso 12;Plectin-1 iso3 iso 13;Plectin-1 iso3 iso 14;Plectin-1 iso3 iso 15;Plectin-1 iso3 iso 16	§4623; 4618; 4475; 4480; 4475; 4504; 4509; 4521; 4448; 4443; 4458; 4453; 4466; 4482; 4381; 4476	Plectin	PLEC_MOUSE|Q9QXS1;PLEC_MOUSE|Q9QXS1-2;PLEC_MOUSE|Q9QXS1-3;PLEC_MOUSE|Q9QXS1-4;PLEC_MOUSE|Q9QXS1-5;PLEC_MOUSE|Q9QXS1-6;PLEC_MOUSE|Q9QXS1-7;PLEC_MOUSE|Q9QXS1-8;PLEC_MOUSE|Q9QXS1-9;PLEC_MOUSE|Q9QXS1-10;PLEC_MOUSE|Q9QXS1-11;PLEC_MOUSE|Q9QXS1-12;PLEC_MOUSE|Q9QXS1-13;PLEC_MOUSE|Q9QXS1-14;PLEC_MOUSE|Q9QXS1-15;PLEC_MOUSE|Q9QXS1-16	http://www.phosphosite.org/proteinAction.do?id=3451&showAllSites=true	GYYSPYS*VSGSGSTAGSR	3	621.591	1	A	46.56	3.93249e+07	3.7673e+07	6.35664e+07	6.15471e+07	3.84989e+07	6.25568e+07	0.0303402	0.0228252	mouse
960	2250	9.83468e+08	A	0.0663436	Plec;Plec;Plec;Plec;Plec;Plec;Plec;Plec;Plec;Plec;Plec;Plec;Plec;Plec;Plec;Plec	Plectin-1;Plectin-1 iso3 iso 2;Plectin-1 iso3 iso 3;Plectin-1 iso3 iso 4;Plectin-1 iso3 iso 5;Plectin-1 iso6 iso 6;Plectin-1 iso3 iso 7;Plectin-1 iso3 iso 8;Plectin-1 iso3 iso 9;Plectin-1 iso3 iso 10;Plectin-1 iso3 iso 11;Plectin-1 iso3 iso 12;Plectin-1 iso3 iso 13;Plectin-1 iso3 iso 14;Plectin-1 iso3 iso 15;Plectin-1 iso3 iso 16	§4625; 4620; 4477; 4482; 4477; 4506; 4511; 4523; 4450; 4445; 4460; 4455; 4468; 4484; 4383; 4478	Plectin	PLEC_MOUSE|Q9QXS1;PLEC_MOUSE|Q9QXS1-2;PLEC_MOUSE|Q9QXS1-3;PLEC_MOUSE|Q9QXS1-4;PLEC_MOUSE|Q9QXS1-5;PLEC_MOUSE|Q9QXS1-6;PLEC_MOUSE|Q9QXS1-7;PLEC_MOUSE|Q9QXS1-8;PLEC_MOUSE|Q9QXS1-9;PLEC_MOUSE|Q9QXS1-10;PLEC_MOUSE|Q9QXS1-11;PLEC_MOUSE|Q9QXS1-12;PLEC_MOUSE|Q9QXS1-13;PLEC_MOUSE|Q9QXS1-14;PLEC_MOUSE|Q9QXS1-15;PLEC_MOUSE|Q9QXS1-16	http://www.phosphosite.org/proteinAction.do?id=3451&showAllSites=true	GYYSPYSVS*GSGSTAGSR	2	931.883	2	A	48.02	6.86078e+08	7.44732e+08	1.0296e+09	9.37331e+08	7.15405e+08	9.83468e+08	0.0579735	0.0663436	mouse
961	2251	9.83468e+08	A	0.0663436	Plec;Plec;Plec;Plec;Plec;Plec;Plec;Plec;Plec;Plec;Plec;Plec;Plec;Plec;Plec;Plec	Plectin-1;Plectin-1 iso3 iso 2;Plectin-1 iso3 iso 3;Plectin-1 iso3 iso 4;Plectin-1 iso3 iso 5;Plectin-1 iso6 iso 6;Plectin-1 iso3 iso 7;Plectin-1 iso3 iso 8;Plectin-1 iso3 iso 9;Plectin-1 iso3 iso 10;Plectin-1 iso3 iso 11;Plectin-1 iso3 iso 12;Plectin-1 iso3 iso 13;Plectin-1 iso3 iso 14;Plectin-1 iso3 iso 15;Plectin-1 iso3 iso 16	§4629; 4624; 4481; 4486; 4481; 4510; 4515; 4527; 4454; 4449; 4464; 4459; 4472; 4488; 4387; 4482	Plectin	PLEC_MOUSE|Q9QXS1;PLEC_MOUSE|Q9QXS1-2;PLEC_MOUSE|Q9QXS1-3;PLEC_MOUSE|Q9QXS1-4;PLEC_MOUSE|Q9QXS1-5;PLEC_MOUSE|Q9QXS1-6;PLEC_MOUSE|Q9QXS1-7;PLEC_MOUSE|Q9QXS1-8;PLEC_MOUSE|Q9QXS1-9;PLEC_MOUSE|Q9QXS1-10;PLEC_MOUSE|Q9QXS1-11;PLEC_MOUSE|Q9QXS1-12;PLEC_MOUSE|Q9QXS1-13;PLEC_MOUSE|Q9QXS1-14;PLEC_MOUSE|Q9QXS1-15;PLEC_MOUSE|Q9QXS1-16	http://www.phosphosite.org/proteinAction.do?id=3451&showAllSites=true	GYYSPYSVSGSGS*TAGSR	2	931.883	3	A	48.02	6.86078e+08	7.44732e+08	1.0296e+09	9.37331e+08	7.15405e+08	9.83468e+08	0.0579735	0.0663436	mouse
962	2255	7.35116e+07	A	0.292627	Plec;Plec;Plec;Plec;Plec;Plec;Plec;Plec;Plec;Plec;Plec;Plec;Plec;Plec;Plec;Plec	Plectin-1;Plectin-1 iso3 iso 2;Plectin-1 iso3 iso 3;Plectin-1 iso3 iso 4;Plectin-1 iso3 iso 5;Plectin-1 iso6 iso 6;Plectin-1 iso3 iso 7;Plectin-1 iso3 iso 8;Plectin-1 iso3 iso 9;Plectin-1 iso3 iso 10;Plectin-1 iso3 iso 11;Plectin-1 iso3 iso 12;Plectin-1 iso3 iso 13;Plectin-1 iso3 iso 14;Plectin-1 iso3 iso 15;Plectin-1 iso3 iso 16	§4649; 4644; 4501; 4506; 4501; 4530; 4535; 4547; 4474; 4469; 4484; 4479; 4492; 4508; 4407; 4502	Plectin	PLEC_MOUSE|Q9QXS1;PLEC_MOUSE|Q9QXS1-2;PLEC_MOUSE|Q9QXS1-3;PLEC_MOUSE|Q9QXS1-4;PLEC_MOUSE|Q9QXS1-5;PLEC_MOUSE|Q9QXS1-6;PLEC_MOUSE|Q9QXS1-7;PLEC_MOUSE|Q9QXS1-8;PLEC_MOUSE|Q9QXS1-9;PLEC_MOUSE|Q9QXS1-10;PLEC_MOUSE|Q9QXS1-11;PLEC_MOUSE|Q9QXS1-12;PLEC_MOUSE|Q9QXS1-13;PLEC_MOUSE|Q9QXS1-14;PLEC_MOUSE|Q9QXS1-15;PLEC_MOUSE|Q9QXS1-16	http://www.phosphosite.org/proteinAction.do?id=3451&showAllSites=true	RGS*FDATGSGFSM#TFSSSSYSSSGYGR	3	957.052	15	A	63.41	8.87226e+07	5.83007e+07	6.58461e+07	4.60609e+07	7.35116e+07	5.59535e+07	0.292627	0.250034	mouse
963	2258	6.19935e+07	A	0.545128	Plec;Plec;Plec;Plec;Plec;Plec;Plec;Plec;Plec;Plec;Plec;Plec;Plec;Plec;Plec;Plec	Plectin-1;Plectin-1 iso3 iso 2;Plectin-1 iso3 iso 3;Plectin-1 iso3 iso 4;Plectin-1 iso3 iso 5;Plectin-1 iso6 iso 6;Plectin-1 iso3 iso 7;Plectin-1 iso3 iso 8;Plectin-1 iso3 iso 9;Plectin-1 iso3 iso 10;Plectin-1 iso3 iso 11;Plectin-1 iso3 iso 12;Plectin-1 iso3 iso 13;Plectin-1 iso3 iso 14;Plectin-1 iso3 iso 15;Plectin-1 iso3 iso 16	§4653; 4648; 4505; 4510; 4505; 4534; 4539; 4551; 4478; 4473; 4488; 4483; 4496; 4512; 4411; 4506	Plectin	PLEC_MOUSE|Q9QXS1;PLEC_MOUSE|Q9QXS1-2;PLEC_MOUSE|Q9QXS1-3;PLEC_MOUSE|Q9QXS1-4;PLEC_MOUSE|Q9QXS1-5;PLEC_MOUSE|Q9QXS1-6;PLEC_MOUSE|Q9QXS1-7;PLEC_MOUSE|Q9QXS1-8;PLEC_MOUSE|Q9QXS1-9;PLEC_MOUSE|Q9QXS1-10;PLEC_MOUSE|Q9QXS1-11;PLEC_MOUSE|Q9QXS1-12;PLEC_MOUSE|Q9QXS1-13;PLEC_MOUSE|Q9QXS1-14;PLEC_MOUSE|Q9QXS1-15;PLEC_MOUSE|Q9QXS1-16	http://www.phosphosite.org/proteinAction.do?id=3451&showAllSites=true	RGSFDAT*GSGFSMTFSSSSYSSSGYGR	3	951.72	2	A	74.145	7.81734e+07	4.58136e+07	3.01799e+07	1.33866e+07	6.19935e+07	2.17833e+07	0.369101	0.545128	mouse
964	2259	2.61606e+07	A	0.20864	Plec;Plec;Plec;Plec;Plec;Plec;Plec;Plec;Plec;Plec;Plec;Plec;Plec;Plec;Plec;Plec	Plectin-1;Plectin-1 iso3 iso 2;Plectin-1 iso3 iso 3;Plectin-1 iso3 iso 4;Plectin-1 iso3 iso 5;Plectin-1 iso6 iso 6;Plectin-1 iso3 iso 7;Plectin-1 iso3 iso 8;Plectin-1 iso3 iso 9;Plectin-1 iso3 iso 10;Plectin-1 iso3 iso 11;Plectin-1 iso3 iso 12;Plectin-1 iso3 iso 13;Plectin-1 iso3 iso 14;Plectin-1 iso3 iso 15;Plectin-1 iso3 iso 16	§4680; 4675; 4532; 4537; 4532; 4561; 4566; 4578; 4505; 4500; 4515; 4510; 4523; 4539; 4438; 4533	Plectin	PLEC_MOUSE|Q9QXS1;PLEC_MOUSE|Q9QXS1-2;PLEC_MOUSE|Q9QXS1-3;PLEC_MOUSE|Q9QXS1-4;PLEC_MOUSE|Q9QXS1-5;PLEC_MOUSE|Q9QXS1-6;PLEC_MOUSE|Q9QXS1-7;PLEC_MOUSE|Q9QXS1-8;PLEC_MOUSE|Q9QXS1-9;PLEC_MOUSE|Q9QXS1-10;PLEC_MOUSE|Q9QXS1-11;PLEC_MOUSE|Q9QXS1-12;PLEC_MOUSE|Q9QXS1-13;PLEC_MOUSE|Q9QXS1-14;PLEC_MOUSE|Q9QXS1-15;PLEC_MOUSE|Q9QXS1-16	http://www.phosphosite.org/proteinAction.do?id=3451&showAllSites=true	RYASGPS*ASLGGPESAVA	2	878.899	1	A	52.85	2.62119e+07	2.61094e+07	2.05506e+07	1.52665e+07	2.61606e+07	1.79085e+07	0.00277217	0.20864	mouse
965	2260	1.55039e+08	A	0.112112	Rab11fip5	RAB11FIP5	§280	Rab11 family-interacting protein 5	RFIP5_MOUSE|Q8R361	http://www.phosphosite.org/proteinAction.do?id=5607&showAllSites=true	SPS*HSSWLSTEGGR	2	784.331	4	A	42.465	1.54926e+08	1.55153e+08	1.47605e+08	1.25921e+08	1.55039e+08	1.36763e+08	0.00103236	0.112112	mouse
966	2261	2.5811e+07	A	0.266466	Rab11fip5	RAB11FIP5	§280, §282	Rab11 family-interacting protein 5	RFIP5_MOUSE|Q8R361	http://www.phosphosite.org/proteinAction.do?id=5607&showAllSites=true	SPS*HS*SWLSTEGGR	2	824.314	1	A	49.0233	1.92216e+07	2.16126e+07	3.06743e+07	2.09477e+07	2.04171e+07	2.5811e+07	0.0828081	0.266466	mouse
967	2262	1.22594e+08	A	0.190326	Rab11fip5	RAB11FIP5	§282	Rab11 family-interacting protein 5	RFIP5_MOUSE|Q8R361	http://www.phosphosite.org/proteinAction.do?id=5607&showAllSites=true	SPSHS*SWLSTEGGR	3	523.223	3	A	40.9	1.02951e+08	1.01991e+08	1.39093e+08	1.06095e+08	1.02471e+08	1.22594e+08	0.00662789	0.190326	mouse
968	2263	2.5811e+07	A	0.266466	Rab11fip5	RAB11FIP5	§282, §283	Rab11 family-interacting protein 5	RFIP5_MOUSE|Q8R361	http://www.phosphosite.org/proteinAction.do?id=5607&showAllSites=true	SPSHS*S*WLSTEGGR	2	824.314	3	A	49.0233	1.92216e+07	2.16126e+07	3.06743e+07	2.09477e+07	2.04171e+07	2.5811e+07	0.0828081	0.266466	mouse
969	2264	1.22594e+08	A	0.190326	Rab11fip5	RAB11FIP5	§283	Rab11 family-interacting protein 5	RFIP5_MOUSE|Q8R361	http://www.phosphosite.org/proteinAction.do?id=5607&showAllSites=true	SPSHSS*WLSTEGGR	3	523.223	1	A	40.9	1.02951e+08	1.01991e+08	1.39093e+08	1.06095e+08	1.02471e+08	1.22594e+08	0.00662789	0.190326	mouse
970	2266	3.97125e+08	A	0.240019	Rcsd1;Rcsd1	CapZIP;CapZIP iso 2	§243, §246; 213, §216	CapZ-interacting protein	CPZIP_MOUSE|Q3UZA1;CPZIP_MOUSE|Q3UZA1-2	http://www.phosphosite.org/proteinAction.do?id=7841&showAllSites=true	RNT*CNS*TEKPEELVR	3	664.946	9	A	30.96	3.83686e+08	4.10563e+08	2.25289e+08	1.59913e+08	3.97125e+08	1.92601e+08	0.0478577	0.240019	mouse
971	2270	3.97125e+08	A	0.240019	Rcsd1;Rcsd1	CapZIP;CapZIP iso 2	§243, §247; 213, 217	CapZ-interacting protein	CPZIP_MOUSE|Q3UZA1;CPZIP_MOUSE|Q3UZA1-2	http://www.phosphosite.org/proteinAction.do?id=7841&showAllSites=true	RNT*CNST*EKPEELVR	3	664.946	3	A	30.96	3.83686e+08	4.10563e+08	2.25289e+08	1.59913e+08	3.97125e+08	1.92601e+08	0.0478577	0.240019	mouse
972	2271	3.6007e+07	A	0.195616	Rcsd1;Rcsd1	CapZIP;CapZIP iso 2	§243, §256; 213, 226	CapZ-interacting protein	CPZIP_MOUSE|Q3UZA1;CPZIP_MOUSE|Q3UZA1-2	http://www.phosphosite.org/proteinAction.do?id=7841&showAllSites=true	RNT*CNSTEKPEELVRT*PEEANAGEK	4	755.577	2	A	35.84	9.87525e+06	1.30457e+07	4.01212e+07	3.18929e+07	1.14605e+07	3.6007e+07	0.195616	0.161587	mouse
973	2273	2.53008e+08	A	0.0979745	Rcsd1;Rcsd1	CapZIP;CapZIP iso 2	§243; 213	CapZ-interacting protein	CPZIP_MOUSE|Q3UZA1;CPZIP_MOUSE|Q3UZA1-2	http://www.phosphosite.org/proteinAction.do?id=7841&showAllSites=true	RNT*CNSTEKPEELVR	3	638.291	4	A	26.35	1.40292e+08	1.41769e+08	2.70536e+08	2.3548e+08	1.41031e+08	2.53008e+08	0.00740617	0.0979745	mouse
974	2274	8.04123e+07	A	0.279272	Rcsd1;Rcsd1	CapZIP;CapZIP iso 2	§246, §247; §216, 217	CapZ-interacting protein	CPZIP_MOUSE|Q3UZA1;CPZIP_MOUSE|Q3UZA1-2	http://www.phosphosite.org/proteinAction.do?id=7841&showAllSites=true	RRNTCNS*T*EKPEELVR	3	716.98	1	A	28.23	6.45329e+07	9.62918e+07	3.73715e+07	3.40239e+07	8.04123e+07	3.56977e+07	0.279272	0.0663094	mouse
975	2275	2.53008e+08	A	0.0979745	Rcsd1;Rcsd1	CapZIP;CapZIP iso 2	§246; §216	CapZ-interacting protein	CPZIP_MOUSE|Q3UZA1;CPZIP_MOUSE|Q3UZA1-2	http://www.phosphosite.org/proteinAction.do?id=7841&showAllSites=true	RNTCNS*TEKPEELVR	3	638.291	2	A	26.35	1.40292e+08	1.41769e+08	2.70536e+08	2.3548e+08	1.41031e+08	2.53008e+08	0.00740617	0.0979745	mouse
976	2277	1.57536e+07	A	0.138389	Rcsd1;Rcsd1	CapZIP;CapZIP iso 2	§247; 217	CapZ-interacting protein	CPZIP_MOUSE|Q3UZA1;CPZIP_MOUSE|Q3UZA1-2	http://www.phosphosite.org/proteinAction.do?id=7841&showAllSites=true	RRNTCNST*EKPEELVR	3	690.325	2	A	22.495	6.40612e+06	6.58229e+06	1.42121e+07	1.72952e+07	6.49421e+06	1.57536e+07	0.0191817	0.138389	mouse
977	2280	946565088	A	0.0345664	Spire1;Spire1;Spire1	SPIRE1;SPIRE1 iso2 iso 2;SPIRE1 iso2 iso 3	§351; 352; 351	Protein spire homolog 1	SPIR1_MOUSE|Q52KF3;SPIR1_MOUSE|Q52KF3-2;SPIR1_MOUSE|Q52KF3-3	http://www.phosphosite.org/proteinAction.do?id=7706&showAllSites=true	FLPISST*PQPER	2	726.35	15	A	54.17	933224192	916540416	969701184	923428992	924882304	946565088	0.0127554	0.0345664	mouse
978	2284	4.86954e+06	A	0.444043	Spire1;Spire1;Spire1	SPIRE1;SPIRE1 iso2 iso 2;SPIRE1 iso2 iso 3	349; 350; 349	Protein spire homolog 1	SPIR1_MOUSE|Q52KF3;SPIR1_MOUSE|Q52KF3-2;SPIR1_MOUSE|Q52KF3-3	http://www.phosphosite.org/proteinAction.do?id=7706&showAllSites=true	FLPIS*STPQPER	3	484.569	3	A	53.4633	4.15189e+06	2.16765e+06	4.70616e+06	5.03291e+06	3.15977e+06	4.86954e+06	0.444043	0.0474477	mouse
979	2287	2.0463e+08	A	0.0964483	Spire1;Spire1;Spire1	SPIRE1;SPIRE1 iso2 iso 2;SPIRE1 iso2 iso 3	350; 351; 350	Protein spire homolog 1	SPIR1_MOUSE|Q52KF3;SPIR1_MOUSE|Q52KF3-2;SPIR1_MOUSE|Q52KF3-3	http://www.phosphosite.org/proteinAction.do?id=7706&showAllSites=true	FLPISS*TPQPERR	3	536.603	2	A	47.955	1.80948e+08	2.06142e+08	2.18585e+08	1.90674e+08	1.93545e+08	2.0463e+08	0.092043	0.0964483	mouse
980	2289	5920931	A	0.619705	Sptbn1;Sptbn1	SPTBN1 iso2 iso 2;SPTBN1	986; §999	Spectrin beta chain, non-erythrocytic 1	SPTB2_MOUSE|Q62261-2;SPTB2_MOUSE|Q62261	http://www.phosphosite.org/proteinAction.do?id=6043513&showAllSites=true	KLT*GMER	3	305.477	4	A	20.3533	2611808	1959118	8515467	3326395	2285463	5920931	0.201938	0.619705	mouse
981	2290	2.24146e+07	A	0.289488	Ssfa2;Ssfa2	SSFA2;SSFA2 iso 3	§738, §745; 587, 594	Sperm-specific antigen 2 homolog	SSFA2_MOUSE|Q922B9;SSFA2_MOUSE|Q922B9-3	http://www.phosphosite.org/proteinAction.do?id=11059&showAllSites=true	SQS*LPTTLLS*PVR	2	779.867	4	A	78.8525	2.46471e+07	1.65803e+07	2.70028e+07	1.78263e+07	2.06137e+07	2.24146e+07	0.276713	0.289488	mouse
982	2291	3.44287e+07	A	0.127033	Ssfa2;Ssfa2	SSFA2;SSFA2 iso 3	§738; 587	Sperm-specific antigen 2 homolog	SSFA2_MOUSE|Q922B9;SSFA2_MOUSE|Q922B9-3	http://www.phosphosite.org/proteinAction.do?id=11059&showAllSites=true	SQS*LPTTLLSPVR	2	739.884	3	A	76.8633	3.49584e+07	3.38989e+07	2.64366e+07	2.20787e+07	3.44287e+07	2.42577e+07	0.0217599	0.127033	mouse
983	2292	3.44287e+07	A	0.127033	Ssfa2;Ssfa2	SSFA2;SSFA2 iso 3	§741; 590	Sperm-specific antigen 2 homolog	SSFA2_MOUSE|Q922B9;SSFA2_MOUSE|Q922B9-3	http://www.phosphosite.org/proteinAction.do?id=11059&showAllSites=true	SQSLPT*TLLSPVR	2	739.884	1	A	76.8633	3.49584e+07	3.38989e+07	2.64366e+07	2.20787e+07	3.44287e+07	2.42577e+07	0.0217599	0.127033	mouse
984	2293	7050657	A	0.214287	Ssfa2;Ssfa2	SSFA2;SSFA2 iso 3	751; 600	Sperm-specific antigen 2 homolog	SSFA2_MOUSE|Q922B9;SSFA2_MOUSE|Q922B9-3	http://www.phosphosite.org/proteinAction.do?id=11059&showAllSites=true	VVS*SVNVR	2	470.237	1	A	32.59	6350053	7751261	5863712	7958038	7050657	6910875	0.140526	0.214287	mouse
985	2294	8.1583e+07	A	0.140534	Sun1;Sun1;Sun1;Sun1	SUN1;SUN1 iso 2;SUN1 iso 3;SUN1 iso 4	830, 832; 707, 709; 793, 795; 766, 768	SUN domain-containing protein 1	SUN1_MOUSE|Q9D666;SUN1_MOUSE|Q9D666-2;SUN1_MOUSE|Q9D666-3;SUN1_MOUSE|Q9D666-4	http://www.phosphosite.org/proteinAction.do?id=14990&showAllSites=true	TLS*PT*GNISSAP	2	652.762	1	A	39.26	6.40264e+07	7.81554e+07	8.26048e+07	8.05612e+07	7.10909e+07	8.1583e+07	0.140534	0.0177119	mouse
986	2295	8.1583e+07	A	0.140534	Sun1;Sun1;Sun1;Sun1	SUN1;SUN1 iso 2;SUN1 iso 3;SUN1 iso 4	830, 836; 707, 713; 793, 799; 766, 772	SUN domain-containing protein 1	SUN1_MOUSE|Q9D666;SUN1_MOUSE|Q9D666-2;SUN1_MOUSE|Q9D666-3;SUN1_MOUSE|Q9D666-4	http://www.phosphosite.org/proteinAction.do?id=14990&showAllSites=true	TLS*PTGNIS*SAP	2	652.762	1	A	39.26	6.40264e+07	7.81554e+07	8.26048e+07	8.05612e+07	7.10909e+07	8.1583e+07	0.140534	0.0177119	mouse
987	2296	6.41535e+07	A	0.0804322	Synpo	SYNPO	§197	Synaptopodin	SYNPO_MOUSE|Q8CC35	http://www.phosphosite.org/proteinAction.do?id=5638&showAllSites=true	LNQEALQT*GRPLSPIGHAPGPSVK	3	849.774	1	A	52.32	6.34358e+07	6.48712e+07	4.7177e+07	4.20995e+07	6.41535e+07	4.46383e+07	0.0158207	0.0804322	mouse
988	2297	11929727	A	0.259268	Synpo	SYNPO	§197, §215	Synaptopodin	SYNPO_MOUSE|Q8CC35	http://www.phosphosite.org/proteinAction.do?id=5638&showAllSites=true	LNQEALQT*GRPLSPIGHAPGPSVKPT*SPSK	3	1075.53	1	A	51.54	8344436	12090833	11710096	12149358	1.02176e+07	11929727	0.259268	0.0260362	mouse
989	2298	6.70684e+08	A	0.427485	Synpo	SYNPO	§197, §215, §218	Synaptopodin	SYNPO_MOUSE|Q8CC35	http://www.phosphosite.org/proteinAction.do?id=5638&showAllSites=true	LNQEALQT*GRPLSPIGHAPGPSVKPT*SPS*KPGSPK	5	754.967	1	A	49.29	7.95547e+08	5.45821e+08	8.71635e+08	4.66996e+08	6.70684e+08	6.69316e+08	0.263288	0.427485	mouse
990	2299	6.70684e+08	A	0.427485	Synpo	SYNPO	§197, §215, §222	Synaptopodin	SYNPO_MOUSE|Q8CC35	http://www.phosphosite.org/proteinAction.do?id=5638&showAllSites=true	LNQEALQT*GRPLSPIGHAPGPSVKPT*SPSKPGS*PK	5	754.967	1	A	49.29	7.95547e+08	5.45821e+08	8.71635e+08	4.66996e+08	6.70684e+08	6.69316e+08	0.263288	0.427485	mouse
991	2300	4.98741e+08	A	0.128584	Synpo	SYNPO	§197, §218	Synaptopodin	SYNPO_MOUSE|Q8CC35	http://www.phosphosite.org/proteinAction.do?id=5638&showAllSites=true	LNQEALQT*GRPLSPIGHAPGPSVKPTSPS*KPGSPK	5	738.974	2	A	47.22	3.13239e+08	3.59901e+08	5.44088e+08	4.53395e+08	3.3657e+08	4.98741e+08	0.0980339	0.128584	mouse
992	2301	4.98741e+08	A	0.128584	Synpo	SYNPO	§197, §222	Synaptopodin	SYNPO_MOUSE|Q8CC35	http://www.phosphosite.org/proteinAction.do?id=5638&showAllSites=true	LNQEALQT*GRPLSPIGHAPGPSVKPTSPSKPGS*PK	5	738.974	1	A	47.22	3.13239e+08	3.59901e+08	5.44088e+08	4.53395e+08	3.3657e+08	4.98741e+08	0.0980339	0.128584	mouse
993	2303	8.73412e+07	A	0.0429211	Synpo	SYNPO	§202	Synaptopodin	SYNPO_MOUSE|Q8CC35	http://www.phosphosite.org/proteinAction.do?id=5638&showAllSites=true	LNQEALQTGRPLS*PIGHAPGPS	3	774.053	13	A	50.7625	8.46904e+07	8.9992e+07	6.983e+07	6.82895e+07	8.73412e+07	6.90598e+07	0.0429211	0.0157727	mouse
994	2308	1.03119e+08	A	0.114476	Synpo	SYNPO	§202, §211, §222	Synaptopodin	SYNPO_MOUSE|Q8CC35	http://www.phosphosite.org/proteinAction.do?id=5638&showAllSites=true	PLS*PIGHAPGPS*VKPTSPSKPGS*PK	4	665.813	1	A	43.39	9.47716e+07	1.11466e+08	9.3338e+07	8.22584e+07	1.03119e+08	8.77982e+07	0.114476	0.089233	mouse
995	2309	6.5441e+07	A	0.263339	Synpo	SYNPO	§202, §211, §222, §227	Synaptopodin	SYNPO_MOUSE|Q8CC35	http://www.phosphosite.org/proteinAction.do?id=5638&showAllSites=true	LNQEALQTGRPLS*PIGHAPGPS*VKPTSPSKPGS*PKHPS*PQSPSR	5	965.655	1	A	45.58	5.32553e+07	7.76267e+07	6.38554e+07	5.25185e+07	6.5441e+07	5.8187e+07	0.263339	0.13777	mouse
996	2311	1.01542e+09	A	0.0773067	Synpo	SYNPO	§202, §215	Synaptopodin	SYNPO_MOUSE|Q8CC35	http://www.phosphosite.org/proteinAction.do?id=5638&showAllSites=true	LNQEALQTGRPLS*PIGHAPGPSVKPT*SPSKPGSPK	4	923.466	3	A	42.665	8.80262e+08	9.82064e+08	1.02846e+09	1.00238e+09	9.31163e+08	1.01542e+09	0.0773067	0.0181641	mouse
997	2316	5.71918e+09	A	0.146812	Synpo	SYNPO	§202, §215, §222	Synaptopodin	SYNPO_MOUSE|Q8CC35	http://www.phosphosite.org/proteinAction.do?id=5638&showAllSites=true	LNQEALQTGRPLS*PIGHAPGPSVKPT*SPSKPGS*PK	4	943.457	18	A	49.9275	6.09633e+09	5.34203e+09	4.45091e+09	3.61371e+09	5.71918e+09	4.03231e+09	0.0932591	0.146812	mouse
998	2322	1.01542e+09	A	0.0773067	Synpo	SYNPO	§202, §216	Synaptopodin	SYNPO_MOUSE|Q8CC35	http://www.phosphosite.org/proteinAction.do?id=5638&showAllSites=true	LNQEALQTGRPLS*PIGHAPGPSVKPTS*PSKPGSPK	4	923.466	6	A	42.665	8.80262e+08	9.82064e+08	1.02846e+09	1.00238e+09	9.31163e+08	1.01542e+09	0.0773067	0.0181641	mouse
999	2328	1.03119e+08	A	0.114476	Synpo	SYNPO	§202, §216, §222	Synaptopodin	SYNPO_MOUSE|Q8CC35	http://www.phosphosite.org/proteinAction.do?id=5638&showAllSites=true	PLS*PIGHAPGPSVKPTS*PSKPGS*PK	4	665.813	12	A	43.39	9.47716e+07	1.11466e+08	9.3338e+07	8.22584e+07	1.03119e+08	8.77982e+07	0.114476	0.089233	mouse
1000	2329	6.5441e+07	A	0.263339	Synpo	SYNPO	§202, §216, §222, §227	Synaptopodin	SYNPO_MOUSE|Q8CC35	http://www.phosphosite.org/proteinAction.do?id=5638&showAllSites=true	LNQEALQTGRPLS*PIGHAPGPSVKPTS*PSKPGS*PKHPS*PQSPSR	5	965.655	1	A	45.58	5.32553e+07	7.76267e+07	6.38554e+07	5.25185e+07	6.5441e+07	5.8187e+07	0.263339	0.13777	mouse
1001	2331	4.98741e+08	A	0.128584	Synpo	SYNPO	§202, §218	Synaptopodin	SYNPO_MOUSE|Q8CC35	http://www.phosphosite.org/proteinAction.do?id=5638&showAllSites=true	LNQEALQTGRPLS*PIGHAPGPSVKPTSPS*KPGSPK	5	738.974	4	A	47.22	3.13239e+08	3.59901e+08	5.44088e+08	4.53395e+08	3.3657e+08	4.98741e+08	0.0980339	0.128584	mouse
1002	2333	2.0213e+08	A	0.0949715	Synpo	SYNPO	§202, §218, §222	Synaptopodin	SYNPO_MOUSE|Q8CC35	http://www.phosphosite.org/proteinAction.do?id=5638&showAllSites=true	PLS*PIGHAPGPSVKPTSPS*KPGS*PK	3	887.414	1	A	42.98	1.88556e+08	2.15705e+08	1.24029e+08	1.27217e+08	2.0213e+08	1.25623e+08	0.0949715	0.0179437	mouse
1003	2335	1.01542e+09	A	0.0773067	Synpo	SYNPO	§202, §222	Synaptopodin	SYNPO_MOUSE|Q8CC35	http://www.phosphosite.org/proteinAction.do?id=5638&showAllSites=true	LNQEALQTGRPLS*PIGHAPGPSVKPTSPSKPGS*PK	4	923.466	8	A	42.665	8.80262e+08	9.82064e+08	1.02846e+09	1.00238e+09	9.31163e+08	1.01542e+09	0.0773067	0.0181641	mouse
1004	2337	6.49452e+06	A	0.26775	Synpo	SYNPO	§216, §222	Synaptopodin	SYNPO_MOUSE|Q8CC35	http://www.phosphosite.org/proteinAction.do?id=5638&showAllSites=true	PTS*PSKPGS*PK	2	621.762	2	A	13.895	5.60315e+06	7.38588e+06	2.57503e+06	3.7778e+06	6.49452e+06	3.17642e+06	0.194099	0.26775	mouse
1005	2338	5.80475e+06	A	0.18893	Synpo	SYNPO	§222	Synaptopodin	SYNPO_MOUSE|Q8CC35	http://www.phosphosite.org/proteinAction.do?id=5638&showAllSites=true	PTSPSKPGS*PK	2	581.779	3	A	13.5567	5.50548e+06	6.10403e+06	3.3896e+06	4.43491e+06	5.80475e+06	3.91225e+06	0.072912	0.18893	mouse
1006	2341	2.33709e+08	A	0.11364	Synpo	SYNPO	§227, §230	Synaptopodin	SYNPO_MOUSE|Q8CC35	http://www.phosphosite.org/proteinAction.do?id=5638&showAllSites=true	HPS*PQS*PSR	2	576.715	8	A	14.03	2.14929e+08	2.52489e+08	1.76181e+08	1.69543e+08	2.33709e+08	1.72862e+08	0.11364	0.0271532	mouse
1007	2344	3.75881e+07	A	0.45005	Synpo	SYNPO	§230	Synaptopodin	SYNPO_MOUSE|Q8CC35	http://www.phosphosite.org/proteinAction.do?id=5638&showAllSites=true	HPSPQS*PSR	3	358.157	10	A	13.235	3.99075e+07	3.52687e+07	4.82179e+07	2.49375e+07	3.75881e+07	3.65777e+07	0.0872653	0.45005	mouse
1008	2641	18441004	A	0.206246	Synpo;Synpo;Synpo	SYNPO;SYNPO iso2 iso 2;SYNPO iso 3	§828, §833, §838; 589, §594, §599; 589, §594, 599	Synaptopodin	SYNPO_MOUSE|Q8CC35;SYNPO_MOUSE|Q8CC35-2;SYNPO_MOUSE|Q8CC35-3	http://www.phosphosite.org/proteinAction.do?id=5638&showAllSites=true	TVS*PRAAS*PAKPS*SLDLVPNLPR	4	654.061	1	A	75.86	12479334	9302684	19598168	17283840	10891009	18441004	0.206246	0.0887412	mouse
1009	2649	5.90183e+08	A	0.153091	Synpo;Synpo;Synpo	SYNPO;SYNPO iso2 iso 2;SYNPO iso 3	§833, §838; §594, §599; §594, 599	Synaptopodin	SYNPO_MOUSE|Q8CC35;SYNPO_MOUSE|Q8CC35-2;SYNPO_MOUSE|Q8CC35-3	http://www.phosphosite.org/proteinAction.do?id=5638&showAllSites=true	AAS*PAKPS*SLDLVPNLPR	3	664.99	25	A	75.92	6.54071e+08	5.26294e+08	6.10481e+08	5.01936e+08	5.90183e+08	5.56208e+08	0.153091	0.137993	mouse
1010	2653	5.90183e+08	A	0.153091	Synpo;Synpo;Synpo	SYNPO;SYNPO iso2 iso 2;SYNPO iso 3	§833, §839; §594, §600; §594, 600	Synaptopodin	SYNPO_MOUSE|Q8CC35;SYNPO_MOUSE|Q8CC35-2;SYNPO_MOUSE|Q8CC35-3	http://www.phosphosite.org/proteinAction.do?id=5638&showAllSites=true	AAS*PAKPSS*LDLVPNLPR	3	664.99	11	A	75.92	6.54071e+08	5.26294e+08	6.10481e+08	5.01936e+08	5.90183e+08	5.56208e+08	0.153091	0.137993	mouse
1011	2680	2.86281e+10	A	0.101729	Synpo;Synpo;Synpo	SYNPO;SYNPO iso2 iso 2;SYNPO iso 3	§833; §594; §594	Synaptopodin	SYNPO_MOUSE|Q8CC35;SYNPO_MOUSE|Q8CC35-2;SYNPO_MOUSE|Q8CC35-3	http://www.phosphosite.org/proteinAction.do?id=5638&showAllSites=true	AAS*PAKPSSLDLVPNLPR	3	638.335	91	A	74.3825	2.65688e+10	3.06875e+10	2.22274e+10	2.40406e+10	2.86281e+10	2.3134e+10	0.101729	0.0554218	mouse
1012	2683	5.90183e+08	A	0.153091	Synpo;Synpo;Synpo	SYNPO;SYNPO iso2 iso 2;SYNPO iso 3	§838, §839; §599, §600; 599, 600	Synaptopodin	SYNPO_MOUSE|Q8CC35;SYNPO_MOUSE|Q8CC35-2;SYNPO_MOUSE|Q8CC35-3	http://www.phosphosite.org/proteinAction.do?id=5638&showAllSites=true	AASPAKPS*S*LDLVPNLPR	3	664.99	5	A	75.92	6.54071e+08	5.26294e+08	6.10481e+08	5.01936e+08	5.90183e+08	5.56208e+08	0.153091	0.137993	mouse
1013	2687	2.86281e+10	A	0.101729	Synpo;Synpo;Synpo	SYNPO;SYNPO iso2 iso 2;SYNPO iso 3	§838; §599; 599	Synaptopodin	SYNPO_MOUSE|Q8CC35;SYNPO_MOUSE|Q8CC35-2;SYNPO_MOUSE|Q8CC35-3	http://www.phosphosite.org/proteinAction.do?id=5638&showAllSites=true	AASPAKPS*SLDLVPNLPR	3	638.335	10	A	74.3825	2.65688e+10	3.06875e+10	2.22274e+10	2.40406e+10	2.86281e+10	2.3134e+10	0.101729	0.0554218	mouse
1014	2695	2.86281e+10	A	0.101729	Synpo;Synpo;Synpo	SYNPO;SYNPO iso2 iso 2;SYNPO iso 3	§839; §600; 600	Synaptopodin	SYNPO_MOUSE|Q8CC35;SYNPO_MOUSE|Q8CC35-2;SYNPO_MOUSE|Q8CC35-3	http://www.phosphosite.org/proteinAction.do?id=5638&showAllSites=true	AASPAKPSS*LDLVPNLPR	3	638.335	25	A	74.3825	2.65688e+10	3.06875e+10	2.22274e+10	2.40406e+10	2.86281e+10	2.3134e+10	0.101729	0.0554218	mouse
1015	2745	1.6498e+08	A	0.217785	Synpo;Synpo;Synpo	SYNPO;SYNPO iso2 iso 2;SYNPO iso 3	§863, §882; §624, §643; 624, 643	Synaptopodin	SYNPO_MOUSE|Q8CC35;SYNPO_MOUSE|Q8CC35-2;SYNPO_MOUSE|Q8CC35-3	http://www.phosphosite.org/proteinAction.do?id=5638&showAllSites=true	S*SPGLYTAPVQDSLQPTAVS*PTYSSDISPVSPSR	3	1217.89	2	A	81.53	1.79414e+08	1.45238e+08	1.90386e+08	1.39573e+08	1.62326e+08	1.6498e+08	0.148874	0.217785	mouse
1016	2746	1.6498e+08	A	0.217785	Synpo;Synpo;Synpo	SYNPO;SYNPO iso2 iso 2;SYNPO iso 3	§863, §893; §624, 654; 624, 654	Synaptopodin	SYNPO_MOUSE|Q8CC35;SYNPO_MOUSE|Q8CC35-2;SYNPO_MOUSE|Q8CC35-3	http://www.phosphosite.org/proteinAction.do?id=5638&showAllSites=true	S*SPGLYTAPVQDSLQPTAVSPTYSSDISPVS*PSR	3	1217.89	1	A	81.53	1.79414e+08	1.45238e+08	1.90386e+08	1.39573e+08	1.62326e+08	1.6498e+08	0.148874	0.217785	mouse
1017	2747	1.6498e+08	A	0.217785	Synpo;Synpo;Synpo	SYNPO;SYNPO iso2 iso 2;SYNPO iso 3	§863, 879; §624, 640; 624, 640	Synaptopodin	SYNPO_MOUSE|Q8CC35;SYNPO_MOUSE|Q8CC35-2;SYNPO_MOUSE|Q8CC35-3	http://www.phosphosite.org/proteinAction.do?id=5638&showAllSites=true	S*SPGLYTAPVQDSLQPT*AVSPTYSSDISPVSPSR	3	1217.89	1	A	81.53	1.79414e+08	1.45238e+08	1.90386e+08	1.39573e+08	1.62326e+08	1.6498e+08	0.148874	0.217785	mouse
1018	2749	2.24759e+07	A	0.472654	Synpo;Synpo;Synpo	SYNPO;SYNPO iso2 iso 2;SYNPO iso 3	§863; §624; 624	Synaptopodin	SYNPO_MOUSE|Q8CC35;SYNPO_MOUSE|Q8CC35-2;SYNPO_MOUSE|Q8CC35-3	http://www.phosphosite.org/proteinAction.do?id=5638&showAllSites=true	S*SPGLYTAPVQDSLQPTAVSPTYSSDISPVSPSR	4	893.677	2	A	81.54	2.64638e+07	1.32056e+07	2.44592e+07	2.04926e+07	1.98347e+07	2.24759e+07	0.472654	0.124793	mouse
1019	2750	1.6498e+08	A	0.217785	Synpo;Synpo;Synpo	SYNPO;SYNPO iso2 iso 2;SYNPO iso 3	§864, §882; §625, §643; 625, 643	Synaptopodin	SYNPO_MOUSE|Q8CC35;SYNPO_MOUSE|Q8CC35-2;SYNPO_MOUSE|Q8CC35-3	http://www.phosphosite.org/proteinAction.do?id=5638&showAllSites=true	SS*PGLYTAPVQDSLQPTAVS*PTYSSDISPVSPSR	3	1217.89	3	A	81.53	1.79414e+08	1.45238e+08	1.90386e+08	1.39573e+08	1.62326e+08	1.6498e+08	0.148874	0.217785	mouse
1020	2751	1.6498e+08	A	0.217785	Synpo;Synpo;Synpo	SYNPO;SYNPO iso2 iso 2;SYNPO iso 3	§864, §893; §625, 654; 625, 654	Synaptopodin	SYNPO_MOUSE|Q8CC35;SYNPO_MOUSE|Q8CC35-2;SYNPO_MOUSE|Q8CC35-3	http://www.phosphosite.org/proteinAction.do?id=5638&showAllSites=true	SS*PGLYTAPVQDSLQPTAVSPTYSSDISPVS*PSR	3	1217.89	3	A	81.53	1.79414e+08	1.45238e+08	1.90386e+08	1.39573e+08	1.62326e+08	1.6498e+08	0.148874	0.217785	mouse
1021	2752	1.6498e+08	A	0.217785	Synpo;Synpo;Synpo	SYNPO;SYNPO iso2 iso 2;SYNPO iso 3	§864, 879; §625, 640; 625, 640	Synaptopodin	SYNPO_MOUSE|Q8CC35;SYNPO_MOUSE|Q8CC35-2;SYNPO_MOUSE|Q8CC35-3	http://www.phosphosite.org/proteinAction.do?id=5638&showAllSites=true	SS*PGLYTAPVQDSLQPT*AVSPTYSSDISPVSPSR	3	1217.89	2	A	81.53	1.79414e+08	1.45238e+08	1.90386e+08	1.39573e+08	1.62326e+08	1.6498e+08	0.148874	0.217785	mouse
1022	2753	1.6498e+08	A	0.217785	Synpo;Synpo;Synpo	SYNPO;SYNPO iso2 iso 2;SYNPO iso 3	§864, 890; §625, 651; 625, 651	Synaptopodin	SYNPO_MOUSE|Q8CC35;SYNPO_MOUSE|Q8CC35-2;SYNPO_MOUSE|Q8CC35-3	http://www.phosphosite.org/proteinAction.do?id=5638&showAllSites=true	SS*PGLYTAPVQDSLQPTAVSPTYSSDIS*PVSPSR	3	1217.89	1	A	81.53	1.79414e+08	1.45238e+08	1.90386e+08	1.39573e+08	1.62326e+08	1.6498e+08	0.148874	0.217785	mouse
1023	2755	1.41788e+08	A	0.206077	Synpo;Synpo;Synpo	SYNPO;SYNPO iso2 iso 2;SYNPO iso 3	§864; §625; 625	Synaptopodin	SYNPO_MOUSE|Q8CC35;SYNPO_MOUSE|Q8CC35-2;SYNPO_MOUSE|Q8CC35-3	http://www.phosphosite.org/proteinAction.do?id=5638&showAllSites=true	SS*PGLYTAPVQDSLQPTAVSPTYSSDISPVSPSR	3	1191.23	7	A	74.7475	1.53813e+08	1.29763e+08	1.3401e+08	9.9922e+07	1.41788e+08	1.16966e+08	0.11994	0.206077	mouse
1024	2757	1.41788e+08	A	0.206077	Synpo;Synpo;Synpo	SYNPO;SYNPO iso2 iso 2;SYNPO iso 3	§868; §629; 629	Synaptopodin	SYNPO_MOUSE|Q8CC35;SYNPO_MOUSE|Q8CC35-2;SYNPO_MOUSE|Q8CC35-3	http://www.phosphosite.org/proteinAction.do?id=5638&showAllSites=true	SSPGLY*TAPVQDSLQPTAVSPTYSSDISPVSPSR	3	1191.23	1	A	74.7475	1.53813e+08	1.29763e+08	1.3401e+08	9.9922e+07	1.41788e+08	1.16966e+08	0.11994	0.206077	mouse
1025	2758	1.6498e+08	A	0.217785	Synpo;Synpo;Synpo	SYNPO;SYNPO iso2 iso 2;SYNPO iso 3	§869, §882; §630, §643; 630, 643	Synaptopodin	SYNPO_MOUSE|Q8CC35;SYNPO_MOUSE|Q8CC35-2;SYNPO_MOUSE|Q8CC35-3	http://www.phosphosite.org/proteinAction.do?id=5638&showAllSites=true	SSPGLYT*APVQDSLQPTAVS*PTYSSDISPVSPSR	3	1217.89	1	A	81.53	1.79414e+08	1.45238e+08	1.90386e+08	1.39573e+08	1.62326e+08	1.6498e+08	0.148874	0.217785	mouse
1026	2759	1.6498e+08	A	0.217785	Synpo;Synpo;Synpo	SYNPO;SYNPO iso2 iso 2;SYNPO iso 3	§869, 886; §630, 647; 630, 647	Synaptopodin	SYNPO_MOUSE|Q8CC35;SYNPO_MOUSE|Q8CC35-2;SYNPO_MOUSE|Q8CC35-3	http://www.phosphosite.org/proteinAction.do?id=5638&showAllSites=true	SSPGLYT*APVQDSLQPTAVSPTYS*SDISPVSPSR	3	1217.89	1	A	81.53	1.79414e+08	1.45238e+08	1.90386e+08	1.39573e+08	1.62326e+08	1.6498e+08	0.148874	0.217785	mouse
1027	2760	1.41788e+08	A	0.206077	Synpo;Synpo;Synpo	SYNPO;SYNPO iso2 iso 2;SYNPO iso 3	§869; §630; 630	Synaptopodin	SYNPO_MOUSE|Q8CC35;SYNPO_MOUSE|Q8CC35-2;SYNPO_MOUSE|Q8CC35-3	http://www.phosphosite.org/proteinAction.do?id=5638&showAllSites=true	SSPGLYT*APVQDSLQPTAVSPTYSSDISPVSPSR	3	1191.23	2	A	74.7475	1.53813e+08	1.29763e+08	1.3401e+08	9.9922e+07	1.41788e+08	1.16966e+08	0.11994	0.206077	mouse
1028	2762	1.98158e+07	A	0.0926511	Synpo;Synpo;Synpo	SYNPO;SYNPO iso2 iso 2;SYNPO iso 3	§882; §643; 643	Synaptopodin	SYNPO_MOUSE|Q8CC35;SYNPO_MOUSE|Q8CC35-2;SYNPO_MOUSE|Q8CC35-3	http://www.phosphosite.org/proteinAction.do?id=5638&showAllSites=true	AVS*PTYSSDISPVSPSR	2	915.419	5	A	56.0933	1.85176e+07	2.11141e+07	9.41056e+06	8.74673e+06	1.98158e+07	9.07864e+06	0.0926511	0.0517033	mouse
1029	2764	10564488	A	0.847401	Synpo;Synpo;Synpo	SYNPO;SYNPO iso2 iso 2;SYNPO iso 3	§884, §893; §645, 654; 645, 654	Synaptopodin	SYNPO_MOUSE|Q8CC35;SYNPO_MOUSE|Q8CC35-2;SYNPO_MOUSE|Q8CC35-3	http://www.phosphosite.org/proteinAction.do?id=5638&showAllSites=true	AVSPT*YSSDISPVS*PSR	2	955.403	1	A	52.06	16894762	4234214	4586287	10749073	10564488	7667680	0.847401	0.568327	mouse
1030	2765	1.98158e+07	A	0.0926511	Synpo;Synpo;Synpo	SYNPO;SYNPO iso2 iso 2;SYNPO iso 3	§884; §645; 645	Synaptopodin	SYNPO_MOUSE|Q8CC35;SYNPO_MOUSE|Q8CC35-2;SYNPO_MOUSE|Q8CC35-3	http://www.phosphosite.org/proteinAction.do?id=5638&showAllSites=true	AVSPT*YSSDISPVSPSR	2	915.419	2	A	56.0933	1.85176e+07	2.11141e+07	9.41056e+06	8.74673e+06	1.98158e+07	9.07864e+06	0.0926511	0.0517033	mouse
1031	2767	1.41788e+08	A	0.206077	Synpo;Synpo;Synpo	SYNPO;SYNPO iso2 iso 2;SYNPO iso 3	§885; §646; 646	Synaptopodin	SYNPO_MOUSE|Q8CC35;SYNPO_MOUSE|Q8CC35-2;SYNPO_MOUSE|Q8CC35-3	http://www.phosphosite.org/proteinAction.do?id=5638&showAllSites=true	SSPGLYTAPVQDSLQPTAVSPTY*SSDISPVSPSR	3	1191.23	1	A	74.7475	1.53813e+08	1.29763e+08	1.3401e+08	9.9922e+07	1.41788e+08	1.16966e+08	0.11994	0.206077	mouse
1032	2768	1.41788e+08	A	0.206077	Synpo;Synpo;Synpo	SYNPO;SYNPO iso2 iso 2;SYNPO iso 3	§893; 654; 654	Synaptopodin	SYNPO_MOUSE|Q8CC35;SYNPO_MOUSE|Q8CC35-2;SYNPO_MOUSE|Q8CC35-3	http://www.phosphosite.org/proteinAction.do?id=5638&showAllSites=true	SSPGLYTAPVQDSLQPTAVSPTYSSDISPVS*PSR	3	1191.23	5	A	74.7475	1.53813e+08	1.29763e+08	1.3401e+08	9.9922e+07	1.41788e+08	1.16966e+08	0.11994	0.206077	mouse
1033	2770	71016362	A	0.740784	Synpo;Synpo;Synpo	SYNPO;SYNPO iso2 iso 2;SYNPO iso 3	§909; 670; 670	Synaptopodin	SYNPO_MOUSE|Q8CC35;SYNPO_MOUSE|Q8CC35-2;SYNPO_MOUSE|Q8CC35-3	http://www.phosphosite.org/proteinAction.do?id=5638&showAllSites=true	QAPRPS*FSTR	3	409.527	1	A	27.15	62491660	79541064	18688166	59802808	71016362	39245487	0.16976	0.740784	mouse
1034	2771	1.56695e+08	A	0.0643748	Synpo;Synpo;Synpo	SYNPO;SYNPO iso2 iso 2;SYNPO iso 3	610, 613; 371, 374; 371, 374	Synaptopodin	SYNPO_MOUSE|Q8CC35;SYNPO_MOUSE|Q8CC35-2;SYNPO_MOUSE|Q8CC35-3	http://www.phosphosite.org/proteinAction.do?id=5638&showAllSites=true	GSRKS*M#FT*FVE	2	732.785	3	A	48.73	1.31713e+08	1.34491e+08	1.63828e+08	1.49562e+08	1.33102e+08	1.56695e+08	0.014757	0.0643748	mouse
1035	2772	18441004	A	0.206246	Synpo;Synpo;Synpo	SYNPO;SYNPO iso2 iso 2;SYNPO iso 3	826, §828, §833; 587, 589, §594; 587, 589, §594	Synaptopodin	SYNPO_MOUSE|Q8CC35;SYNPO_MOUSE|Q8CC35-2;SYNPO_MOUSE|Q8CC35-3	http://www.phosphosite.org/proteinAction.do?id=5638&showAllSites=true	T*VS*PRAAS*PAKPSSLDLVPNLPR	4	654.061	2	A	75.86	12479334	9302684	19598168	17283840	10891009	18441004	0.206246	0.0887412	mouse
1036	2773	1.6498e+08	A	0.217785	Synpo;Synpo;Synpo	SYNPO;SYNPO iso2 iso 2;SYNPO iso 3	875, §882; 636, §643; §636, 643	Synaptopodin	SYNPO_MOUSE|Q8CC35;SYNPO_MOUSE|Q8CC35-2;SYNPO_MOUSE|Q8CC35-3	http://www.phosphosite.org/proteinAction.do?id=5638&showAllSites=true	SSPGLYTAPVQDS*LQPTAVS*PTYSSDISPVSPSR	3	1217.89	2	A	81.53	1.79414e+08	1.45238e+08	1.90386e+08	1.39573e+08	1.62326e+08	1.6498e+08	0.148874	0.217785	mouse
1037	2774	2.79454e+06	A	0.469463	Synpo;Synpo;Synpo	SYNPO;SYNPO iso2 iso 2;SYNPO iso 3	875, §884; 636, §645; §636, 645	Synaptopodin	SYNPO_MOUSE|Q8CC35;SYNPO_MOUSE|Q8CC35-2;SYNPO_MOUSE|Q8CC35-3	http://www.phosphosite.org/proteinAction.do?id=5638&showAllSites=true	SSPGLYTAPVQDS*LQPTAVSPT*YSSDISPVSPSR	4	913.668	1	A	83.85	3.41728e+06	1.71393e+06	3.06803e+06	2.52104e+06	2.56561e+06	2.79454e+06	0.469463	0.138406	mouse
1038	2775	1.6498e+08	A	0.217785	Synpo;Synpo;Synpo	SYNPO;SYNPO iso2 iso 2;SYNPO iso 3	875, 879; 636, 640; §636, 640	Synaptopodin	SYNPO_MOUSE|Q8CC35;SYNPO_MOUSE|Q8CC35-2;SYNPO_MOUSE|Q8CC35-3	http://www.phosphosite.org/proteinAction.do?id=5638&showAllSites=true	SSPGLYTAPVQDS*LQPT*AVSPTYSSDISPVSPSR	3	1217.89	1	A	81.53	1.79414e+08	1.45238e+08	1.90386e+08	1.39573e+08	1.62326e+08	1.6498e+08	0.148874	0.217785	mouse
1039	2776	1.41788e+08	A	0.206077	Synpo;Synpo;Synpo	SYNPO;SYNPO iso2 iso 2;SYNPO iso 3	875; 636; §636	Synaptopodin	SYNPO_MOUSE|Q8CC35;SYNPO_MOUSE|Q8CC35-2;SYNPO_MOUSE|Q8CC35-3	http://www.phosphosite.org/proteinAction.do?id=5638&showAllSites=true	SSPGLYTAPVQDS*LQPTAVSPTYSSDISPVSPSR	3	1191.23	2	A	74.7475	1.53813e+08	1.29763e+08	1.3401e+08	9.9922e+07	1.41788e+08	1.16966e+08	0.11994	0.206077	mouse
1040	2778	1.6498e+08	A	0.217785	Synpo;Synpo;Synpo	SYNPO;SYNPO iso2 iso 2;SYNPO iso 3	879, 886; 640, 647; 640, 647	Synaptopodin	SYNPO_MOUSE|Q8CC35;SYNPO_MOUSE|Q8CC35-2;SYNPO_MOUSE|Q8CC35-3	http://www.phosphosite.org/proteinAction.do?id=5638&showAllSites=true	SSPGLYTAPVQDSLQPT*AVSPTYS*SDISPVSPSR	3	1217.89	1	A	81.53	1.79414e+08	1.45238e+08	1.90386e+08	1.39573e+08	1.62326e+08	1.6498e+08	0.148874	0.217785	mouse
1041	2780	1.41788e+08	A	0.206077	Synpo;Synpo;Synpo	SYNPO;SYNPO iso2 iso 2;SYNPO iso 3	879; 640; 640	Synaptopodin	SYNPO_MOUSE|Q8CC35;SYNPO_MOUSE|Q8CC35-2;SYNPO_MOUSE|Q8CC35-3	http://www.phosphosite.org/proteinAction.do?id=5638&showAllSites=true	SSPGLYTAPVQDSLQPT*AVSPTYSSDISPVSPSR	3	1191.23	4	A	74.7475	1.53813e+08	1.29763e+08	1.3401e+08	9.9922e+07	1.41788e+08	1.16966e+08	0.11994	0.206077	mouse
1042	2345	2.83393e+06	A	0.486096	Synpo	SYNPO iso2	§723	Synaptopodin	SYNPO_MOUSE|Q8CC35-2	http://www.phosphosite.org/proteinAction.do?id=23728&showAllSites=true	GSSM#SS*PPPLPPPPPMSPSWSER	3	834.367	1	A	73.62	2.97783e+06	2.57218e+06	3.80802e+06	1.85985e+06	2.775e+06	2.83393e+06	0.103367	0.486096	mouse
1043	2354	1.02222e+08	A	0.493347	Synpo	SYNPO iso2	§723, §734	Synaptopodin	SYNPO_MOUSE|Q8CC35-2	http://www.phosphosite.org/proteinAction.do?id=23728&showAllSites=true	GSSMSS*PPPLPPPPPMS*PSWSER	3	855.691	14	A	76.4	5.28562e+07	1.09491e+08	1.01871e+08	1.02574e+08	8.11734e+07	1.02222e+08	0.493347	0.00486258	mouse
1044	2355	7.47248e+07	A	0.343377	Synpo	SYNPO iso2	§723, 738	Synaptopodin	SYNPO_MOUSE|Q8CC35-2	http://www.phosphosite.org/proteinAction.do?id=23728&showAllSites=true	GSSM#SS*PPPLPPPPPMSPSWS*ER	3	861.023	1	A	73.2333	9.28683e+07	5.65813e+07	8.16317e+07	5.43614e+07	7.47248e+07	6.79966e+07	0.343377	0.283588	mouse
1045	2356	3.42014e+08	A	0.142698	Synpo	SYNPO iso2	§741, §743	Synaptopodin	SYNPO_MOUSE|Q8CC35-2	http://www.phosphosite.org/proteinAction.do?id=23728&showAllSites=true	S*VS*PLRSETEARPPSR	3	643.626	3	A	36.3567	3.07504e+08	3.76524e+08	2.82545e+08	2.58529e+08	3.42014e+08	2.70537e+08	0.142698	0.0627699	mouse
1046	2360	7.08965e+08	A	0.159583	Synpo	SYNPO iso2	§774	Synaptopodin	SYNPO_MOUSE|Q8CC35-2	http://www.phosphosite.org/proteinAction.do?id=23728&showAllSites=true	S*ASPRPAPAETLRPFSPPQGPPPPPAR	4	714.614	6	A	46.135	7.88966e+08	6.28963e+08	6.44056e+08	5.77719e+08	7.08965e+08	6.10887e+08	0.159583	0.0767853	mouse
1047	2361	4.8088e+09	A	0.0648164	Synpo	SYNPO iso2	§774, §784	Synaptopodin	SYNPO_MOUSE|Q8CC35-2	http://www.phosphosite.org/proteinAction.do?id=23728&showAllSites=true	S*ASPRPAPAET*LRPFSPPQGPPPPPAR	3	979.139	2	A	57.935	5.0292e+09	4.5884e+09	3.81605e+09	3.80068e+09	4.8088e+09	3.80837e+09	0.0648164	0.00285456	mouse
1048	2366	6.3991e+09	A	0.130628	Synpo	SYNPO iso2	§774, §789	Synaptopodin	SYNPO_MOUSE|Q8CC35-2	http://www.phosphosite.org/proteinAction.do?id=23728&showAllSites=true	S*ASPRPAPAETLRPFS*PPQGPPPPPAR	4	734.606	13	A	60.365	6.99017e+09	5.80803e+09	5.94918e+09	5.08796e+09	6.3991e+09	5.51857e+09	0.130628	0.110351	mouse
1049	2372	7.08965e+08	A	0.159583	Synpo	SYNPO iso2	§776	Synaptopodin	SYNPO_MOUSE|Q8CC35-2	http://www.phosphosite.org/proteinAction.do?id=23728&showAllSites=true	SAS*PRPAPAETLRPFSPPQGPPPPPAR	4	714.614	14	A	46.135	7.88966e+08	6.28963e+08	6.44056e+08	5.77719e+08	7.08965e+08	6.10887e+08	0.159583	0.0767853	mouse
1050	2373	6.3991e+09	A	0.130628	Synpo	SYNPO iso2	§776, §784	Synaptopodin	SYNPO_MOUSE|Q8CC35-2	http://www.phosphosite.org/proteinAction.do?id=23728&showAllSites=true	SAS*PRPAPAET*LRPFSPPQGPPPPPAR	4	734.606	1	A	60.365	6.99017e+09	5.80803e+09	5.94918e+09	5.08796e+09	6.3991e+09	5.51857e+09	0.130628	0.110351	mouse
1051	2393	6.3991e+09	A	0.130628	Synpo	SYNPO iso2	§776, §789	Synaptopodin	SYNPO_MOUSE|Q8CC35-2	http://www.phosphosite.org/proteinAction.do?id=23728&showAllSites=true	SAS*PRPAPAETLRPFS*PPQGPPPPPAR	4	734.606	66	A	60.365	6.99017e+09	5.80803e+09	5.94918e+09	5.08796e+09	6.3991e+09	5.51857e+09	0.130628	0.110351	mouse
1052	2407	7.08965e+08	A	0.159583	Synpo	SYNPO iso2	§784	Synaptopodin	SYNPO_MOUSE|Q8CC35-2	http://www.phosphosite.org/proteinAction.do?id=23728&showAllSites=true	SASPRPAPAET*LRPFSPPQGPPPPPAR	4	714.614	40	A	46.135	7.88966e+08	6.28963e+08	6.44056e+08	5.77719e+08	7.08965e+08	6.10887e+08	0.159583	0.0767853	mouse
1053	2409	6.3991e+09	A	0.130628	Synpo	SYNPO iso2	§784, §789	Synaptopodin	SYNPO_MOUSE|Q8CC35-2	http://www.phosphosite.org/proteinAction.do?id=23728&showAllSites=true	SASPRPAPAET*LRPFS*PPQGPPPPPAR	4	734.606	4	A	60.365	6.99017e+09	5.80803e+09	5.94918e+09	5.08796e+09	6.3991e+09	5.51857e+09	0.130628	0.110351	mouse
1054	2488	5.7021e+10	A	0.0572934	Synpo	SYNPO iso2	§789	Synaptopodin	SYNPO_MOUSE|Q8CC35-2	http://www.phosphosite.org/proteinAction.do?id=23728&showAllSites=true	PAPAETLRPFS*PPQGPPPPPAR	3	786.398	294	A	72.4325	5.9331e+10	5.47109e+10	4.06797e+10	4.05134e+10	5.7021e+10	4.05966e+10	0.0572934	0.00289764	mouse
1055	2532	8.18519e+09	A	0.334861	Synpo	SYNPO iso2	§803	Synaptopodin	SYNPO_MOUSE|Q8CC35-2	http://www.phosphosite.org/proteinAction.do?id=23728&showAllSites=true	MRS*PQPASPAR	3	426.532	86	A	16.725	6.22672e+09	1.00903e+10	9.59209e+09	6.77829e+09	8.15851e+09	8.18519e+09	0.334861	0.24308	mouse
1056	2541	4.87702e+08	A	0.247079	Synpo	SYNPO iso2	§803, §808	Synaptopodin	SYNPO_MOUSE|Q8CC35-2	http://www.phosphosite.org/proteinAction.do?id=23728&showAllSites=true	MRS*PQPAS*PAR	3	453.188	24	A	16.005	4.75864e+08	4.9954e+08	5.44292e+08	3.8239e+08	4.87702e+08	4.63341e+08	0.0343274	0.247079	mouse
1057	2543	1.86317e+08	A	0.0673822	Synpo	SYNPO iso2	§808	Synaptopodin	SYNPO_MOUSE|Q8CC35-2	http://www.phosphosite.org/proteinAction.do?id=23728&showAllSites=true	SPQPAS*PAR	2	495.724	5	A	14.5725	1.7744e+08	1.95195e+08	1.45892e+08	1.44903e+08	1.86317e+08	1.45398e+08	0.0673822	0.0048096	mouse
1058	2553	8.21441e+09	A	0.107918	Synpo	SYNPO iso2	§819	Synaptopodin	SYNPO_MOUSE|Q8CC35-2	http://www.phosphosite.org/proteinAction.do?id=23728&showAllSites=true	GAAFS*PIPR	2	498.239	29	A	55.665	7.75334e+09	8.67548e+09	7.64386e+09	6.55997e+09	8.21441e+09	7.10191e+09	0.0793787	0.107918	mouse
1059	2564	1.23048e+09	A	0.225519	Synpo	SYNPO iso2	§819, §824	Synaptopodin	SYNPO_MOUSE|Q8CC35-2	http://www.phosphosite.org/proteinAction.do?id=23728&showAllSites=true	GAAFS*PIPRS*PLPIGPSSCASPR	3	828.05	36	A	74.82	1.37273e+09	1.08823e+09	1.10735e+09	8.02752e+08	1.23048e+09	9.5505e+08	0.163495	0.225519	mouse
1060	2574	1.42906e+07	A	0.238348	Synpo	SYNPO iso2	§824	Synaptopodin	SYNPO_MOUSE|Q8CC35-2	http://www.phosphosite.org/proteinAction.do?id=23728&showAllSites=true	SPIPRS*PLPIGPSSCASPR	3	686.006	26	A	53.1175	13196067	15385114	10975800	7809737	1.42906e+07	9.39277e+06	0.108315	0.238348	mouse
1061	2575	9.97427e+07	A	0.226605	Synpo	SYNPO iso2	§824, §831	Synaptopodin	SYNPO_MOUSE|Q8CC35-2	http://www.phosphosite.org/proteinAction.do?id=23728&showAllSites=true	S*PLPIGPS*SCASPR	2	793.328	1	A	53.09	9.25732e+07	1.06912e+08	7.98335e+07	5.77827e+07	9.97427e+07	6.88081e+07	0.101654	0.226605	mouse
1062	2576	9.97427e+07	A	0.226605	Synpo	SYNPO iso2	§824, §832	Synaptopodin	SYNPO_MOUSE|Q8CC35-2	http://www.phosphosite.org/proteinAction.do?id=23728&showAllSites=true	S*PLPIGPSS*CASPR	2	793.328	1	A	53.09	9.25732e+07	1.06912e+08	7.98335e+07	5.77827e+07	9.97427e+07	6.88081e+07	0.101654	0.226605	mouse
1063	2578	9.97427e+07	A	0.226605	Synpo	SYNPO iso2	§824, §835	Synaptopodin	SYNPO_MOUSE|Q8CC35-2	http://www.phosphosite.org/proteinAction.do?id=23728&showAllSites=true	S*PLPIGPSSCAS*PR	2	793.328	7	A	53.09	9.25732e+07	1.06912e+08	7.98335e+07	5.77827e+07	9.97427e+07	6.88081e+07	0.101654	0.226605	mouse
1064	2580	1.12349e+09	A	0.102408	Synpo	SYNPO iso2	§831	Synaptopodin	SYNPO_MOUSE|Q8CC35-2	http://www.phosphosite.org/proteinAction.do?id=23728&showAllSites=true	SPLPIGPS*SCASPR	2	753.345	5	A	53.0567	1.05714e+09	1.18983e+09	1.06939e+09	9.2497e+08	1.12349e+09	9.97179e+08	0.0835088	0.102408	mouse
1065	2582	1.59134e+08	A	0.379563	Synpo	SYNPO iso2	§831, §838	Synaptopodin	SYNPO_MOUSE|Q8CC35-2	http://www.phosphosite.org/proteinAction.do?id=23728&showAllSites=true	SPLPIGPS*SCASPRS*PQAAPSRPFPYR	4	760.853	2	A	63.35	1.75369e+08	1.18687e+08	2.01844e+08	1.16424e+08	1.47028e+08	1.59134e+08	0.272601	0.379563	mouse
1066	2583	1.12349e+09	A	0.102408	Synpo	SYNPO iso2	§832	Synaptopodin	SYNPO_MOUSE|Q8CC35-2	http://www.phosphosite.org/proteinAction.do?id=23728&showAllSites=true	SPLPIGPSS*CASPR	2	753.345	1	A	53.0567	1.05714e+09	1.18983e+09	1.06939e+09	9.2497e+08	1.12349e+09	9.97179e+08	0.0835088	0.102408	mouse
1067	2586	1.59134e+08	A	0.379563	Synpo	SYNPO iso2	§832, §838	Synaptopodin	SYNPO_MOUSE|Q8CC35-2	http://www.phosphosite.org/proteinAction.do?id=23728&showAllSites=true	SPLPIGPSS*CASPRS*PQAAPSRPFPYR	4	760.853	7	A	63.35	1.75369e+08	1.18687e+08	2.01844e+08	1.16424e+08	1.47028e+08	1.59134e+08	0.272601	0.379563	mouse
1068	2591	4.49882e+07	A	0.176377	Synpo	SYNPO iso2	§835	Synaptopodin	SYNPO_MOUSE|Q8CC35-2	http://www.phosphosite.org/proteinAction.do?id=23728&showAllSites=true	SPLPIGPSSCAS*PRSPQAAPSR	3	767.367	11	A	44.505	3.93774e+07	5.0599e+07	2.13135e+07	2.41575e+07	4.49882e+07	2.27355e+07	0.176377	0.0884517	mouse
1069	2592	1.59134e+08	A	0.379563	Synpo	SYNPO iso2	§835, §838	Synaptopodin	SYNPO_MOUSE|Q8CC35-2	http://www.phosphosite.org/proteinAction.do?id=23728&showAllSites=true	SPLPIGPSSCAS*PRS*PQAAPSRPFPYR	4	760.853	1	A	63.35	1.75369e+08	1.18687e+08	2.01844e+08	1.16424e+08	1.47028e+08	1.59134e+08	0.272601	0.379563	mouse
1070	2612	4.49882e+07	A	0.176377	Synpo	SYNPO iso2	§838	Synaptopodin	SYNPO_MOUSE|Q8CC35-2	http://www.phosphosite.org/proteinAction.do?id=23728&showAllSites=true	SPLPIGPSSCASPRS*PQAAPSR	3	767.367	56	A	44.505	3.93774e+07	5.0599e+07	2.13135e+07	2.41575e+07	4.49882e+07	2.27355e+07	0.176377	0.0884517	mouse
1071	2617	1.87624e+08	A	0.0617409	Synpo	SYNPO iso2	§852	Synaptopodin	SYNPO_MOUSE|Q8CC35-2	http://www.phosphosite.org/proteinAction.do?id=23728&showAllSites=true	S*PTDSDVSLDSEDSGLK	2	916.378	6	A	45.7767	1.51351e+08	1.65169e+08	1.90644e+08	1.84604e+08	1.5826e+08	1.87624e+08	0.0617409	0.0227628	mouse
1072	2618	5.14472e+07	A	0.0858506	Synpo	SYNPO iso2	§854	Synaptopodin	SYNPO_MOUSE|Q8CC35-2	http://www.phosphosite.org/proteinAction.do?id=23728&showAllSites=true	RSPT*DSDVSLDSEDSGLK	2	994.428	12	A	45.88	4.46388e+07	5.04087e+07	5.15298e+07	5.13646e+07	4.75238e+07	5.14472e+07	0.0858506	0.00227112	mouse
1073	2623	2.10525e+08	A	0.128312	Synpo	SYNPO iso2	§856	Synaptopodin	SYNPO_MOUSE|Q8CC35-2	http://www.phosphosite.org/proteinAction.do?id=23728&showAllSites=true	RSPTDS*DVSLDSEDSGLK	3	663.288	2	A	42.295	1.66017e+08	1.99149e+08	2.15783e+08	2.05267e+08	1.82583e+08	2.10525e+08	0.128312	0.0353239	mouse
1074	2624	10745316	A	0.281595	Synpo	SYNPO iso2	§859	Synaptopodin	SYNPO_MOUSE|Q8CC35-2	http://www.phosphosite.org/proteinAction.do?id=23728&showAllSites=true	SPTDSDVS*LDSEDSGLKSPGILGYNICPR	3	1053.81	1	A	78.77	11676450	9814182	293826	439930	10745316	366878	0.122548	0.281595	mouse
1075	2627	2.37563e+08	A	0.210081	Synpo	SYNPO iso2	§869	Synaptopodin	SYNPO_MOUSE|Q8CC35-2	http://www.phosphosite.org/proteinAction.do?id=23728&showAllSites=true	S*PGILGYNICPR	2	713.831	7	A	74.0467	2.31443e+08	2.43682e+08	1.38887e+08	1.0296e+08	2.37563e+08	1.20923e+08	0.0364301	0.210081	mouse
1076	2629	1.02222e+08	A	0.493347	Synpo	SYNPO iso2	719, §734	Synaptopodin	SYNPO_MOUSE|Q8CC35-2	http://www.phosphosite.org/proteinAction.do?id=23728&showAllSites=true	GS*SMSSPPPLPPPPPMS*PSWSER	3	855.691	2	A	76.4	5.28562e+07	1.09491e+08	1.01871e+08	1.02574e+08	8.11734e+07	1.02222e+08	0.493347	0.00486258	mouse
1077	2631	3578383	A	0.202843	Synpo	SYNPO iso2	720	Synaptopodin	SYNPO_MOUSE|Q8CC35-2	http://www.phosphosite.org/proteinAction.do?id=23728&showAllSites=true	GSS*MSSPPPLPPPPPMSPSWSER	3	829.036	2	A	75.43		3578383	2612731	3487732	3578383	3.05023e+06		0.202843	mouse
1078	2635	7.47248e+07	A	0.343377	Synpo	SYNPO iso2	720, §734	Synaptopodin	SYNPO_MOUSE|Q8CC35-2	http://www.phosphosite.org/proteinAction.do?id=23728&showAllSites=true	GSS*MSSPPPLPPPPPM#S*PSWSER	3	861.023	6	A	73.2333	9.28683e+07	5.65813e+07	8.16317e+07	5.43614e+07	7.47248e+07	6.79966e+07	0.343377	0.283588	mouse
1079	2639	1.02222e+08	A	0.493347	Synpo	SYNPO iso2	722, §734	Synaptopodin	SYNPO_MOUSE|Q8CC35-2	http://www.phosphosite.org/proteinAction.do?id=23728&showAllSites=true	GSSMS*SPPPLPPPPPMS*PSWSER	3	855.691	7	A	76.4	5.28562e+07	1.09491e+08	1.01871e+08	1.02574e+08	8.11734e+07	1.02222e+08	0.493347	0.00486258	mouse
1080	2640	4.35419e+08	A	0.157761	Synpo;Brca1	SYNPO iso2;BRCA1	§743; 967	Synaptopodin	SYNPO_MOUSE|Q8CC35-2;BRCA1_MOUSE|P48754	http://www.phosphosite.org/proteinAction.do?id=23728&showAllSites=true	SVS*PIR	2	369.681	1	A	25.44	4.06695e+08	4.20506e+08	4.83992e+08	3.86846e+08	4.13601e+08	4.35419e+08	0.0236112	0.157761	mouse
1081	2783	1.02596e+09	A	0.0762184	Tln1	Talin-1	§1201	Talin-1	TLN1_MOUSE|P26039	http://www.phosphosite.org/proteinAction.do?id=3418&showAllSites=true	CVS*CLPGQR	2	578.736	7	A	33.6425	8.8069e+08	8.79771e+08	1.08126e+09	9.70668e+08	8.8023e+08	1.02596e+09	0.000738596	0.0762184	mouse
1082	2784	1.75496e+07	A	0.205291	Triobp;Triobp;Triobp;Triobp	Tara;Tara iso6 iso 4;Tara iso6 iso 1;Tara iso6 iso 2	§1603; 1557; 169; 1607	TRIO and F-actin-binding protein	TARA_MOUSE|Q99KW3;TARA_MOUSE|Q99KW3-4;TARA_MOUSE|Q99KW3-1;TARA_MOUSE|Q99KW3-2	http://www.phosphosite.org/proteinAction.do?id=5273&showAllSites=true	ADGPRPSLDYVELSPLAPS*SPQR	3	844.742	3	A	76.1233	1.5499e+07	1.15696e+07	1.9248e+07	1.58512e+07	1.35343e+07	1.75496e+07	0.205291	0.136864	mouse
[truncated: 2,218 more rows]
